# Supplementary material for: Integrated metabolomics and lipidomics analyses suggest the temperature-dependent lipid desaturation promotes aflatoxin biosynthesis in Aspergillus flavus
Source: Front Microbiol. 2023 Mar 31;14:1137643. doi: 10.3389/fmicb.2023.1137643 (PMC10102665; doi:10.3389/fmicb.2023.1137643)
Supplement: Supplementary file 1 [file Table_1.XLSX]

## Sheet: Supplementary Table S1
Supplementary Table S1 List of genes and primers used in this study.
Genes	Genbank ID	Primers used
Omega-6 fatty acid desaturase	XM_002380151.1	F: ACCTCCTGGTGTGGTATGGA
		R: AGCCGAAGTCACGGTCAATG
Delta8-sphingolipid desaturase	XM_002378988.1	F: CAGCCGTACGTCAAGGAGTT
		R: CCCTCGACTAAATCCCTCGC
β-tubulin	XM_041294101.1	F: CCAAGAACATGATGGCTGCT
		R: CTTGAAGAGCTCCTGGATGG
