# Supplementary material for: Integrated metabolomics and lipidomics analyses suggest the temperature-dependent lipid desaturation promotes aflatoxin biosynthesis in Aspergillus flavus
Source: Front Microbiol. 2023 Mar 31;14:1137643. doi: 10.3389/fmicb.2023.1137643 (PMC10102665; doi:10.3389/fmicb.2023.1137643)
Supplement: Supplementary file 2 [file Table_2.XLSX]

## Sheet: Supplementary Table S2
Supplementary Table S2 The total peak information for primary metabolome in mycelia samples detected by GC-MS.
1
2	Experiment title:		The total peak information for primary metabolome in mycelia samples detected by GC-MS.
3	Plant species:		Aspergillus flavus
4	Organ/tissue:		mycelia
5	Analytical tool:		GC-MS
6
7	Peak no.- number referenced back to the main text
8	RT- Retention time
9	Corresponding metabolite name in literature
10	Metabolite Class
11	Molecular formula of the metabolite
12	Qualitative ion
13	1, 2- different isomers
14	Identification level (A; B; C; D)- (A) standard or NMR; (B) MS/MS; (C) MSE; (D) MS only
15	Peak No.	RT (min)	Corresponding metabolite name in literature	Metabolite Class	Molecular formula	Qualitative ion	Identification level (A-D)	28-2D-1	28-2D-2	28-2D-3	28-2D-4	28-2D-5	28-3D-1	28-3D-2	28-3D-3	28-3D-4	28-3D-5	28-4D-1	28-4D-2	28-4D-3	28-4D-4	28-4D-5	28-5D-1	28-5D-2	28-5D-3	28-5D-4	28-5D-5	28-6D-1	28-6D-2	28-6D-3	28-6D-4	28-6D-5	37-2D-1	37-2D-2	37-2D-3	37-2D-4	37-2D-5	37-3D-1	37-3D-2	37-3D-3	37-3D-4	37-3D-5	37-4D-1	37-4D-2	37-4D-3	37-4D-4	37-4D-5	37-5D-1	37-5D-2
16	1	4.33	Propanoic acid	unspecified	C3H6O2	147	D	4.56748	4.43886	5.50859	3.96641	3.10982	1.37331	1.54618	2.18344	3.02896	1.45191	0.850106	0.688162	1.01384	0.760141	0.860471	0.638472	0.478046	0.445515	0.441026	0.501958	0.470758	0.443737	0.767178	0.774475	0.383447	0.995475	1.22665	1.29294	1.53969	1.36473	0.267306	0.256283	0.197389	0.26832	0.314334	0.0812802	0.160572	0.104007	0.110232	0.175661	0.0410134	0.0665403
17	2	4.511	Pentasiloxane	unspecified	C10H30O4Si5	281	D	0.84915	0.728223	0.663277	0.642465	0.673	0.57957	1.25227	2.08904	1.03214	0.557086	0.754353	0.67376	0.72921	0.585267	1.02978	1.90423	0.728754	0.70346	0.933541	0.730046	1.07148	0.597573	1.1899	1.07908	0.545768	0.375467	0.379949	0.658036	0.72883	0.505586	0.201216	0.380025	0.454009	0.693205	0.625602	0.546528	0.528829	0.514625	0.818311	0.727919	0.518575	0.560125
18	3	4.796	Benzoic acid	unspecified	C7H6O2	121	D	7.06771	6.87274	5.06941	4.31818	4.59212	2.274	3.91234	3.99174	4.10997	1.80685	1.15398	0.92901	1.56555	0.809024	1.22368	0.586256	0.420834	0.479062	0.742855	0.88975	0.232032	0.307464	0.786086	0.839903	0.472887	2.23827	2.99789	4.2026	6.97552	3.25242	0.636544	1.22192	0.738444	0.958125	1.21971	0.47818	0.468034	0.604783	0.54082	0.397013	0	0.0277909
19	4	4.907	2,6-dimethoxyamphetamine	unspecified	C11H17NO2	152	D	1.10384	1.15898	1.30191	1.34269	1.40555	0.975167	1.22363	1.34755	1.16775	1.16278	1.07859	1.19733	1.39488	1.11208	1.19659	1.29705	1.33646	1.25776	1.16141	1.32315	1.23842	1.24001	2.14017	1.85906	1.34544	0.777302	1.08218	1.09824	1.31174	1.37576	0.745293	0.804558	0.91717	0.907451	1.0189	0.68698	0.76695	0.970096	0.905339	1.18275	0.551126	0.621905
20	5	5.004	Alanine	Amino acid	C3H7NO2	116	A	1.83858	1.65816	2.05718	1.51814	0.870873	1.95555	2.36382	2.23928	2.04798	1.47881	1.21664	1.13084	1.28576	0.970148	1.10937	1.0064	0.724302	0.599082	0.669088	0.674998	0.309371	0.193065	0.512681	0.458994	0.268478	1.77184	1.97769	2.17085	2.19684	2.10124	0.719869	0.988234	0.693067	0.697732	0.697364	0.57012	0.590714	0.51529	0.328448	0.300071	0.126241	0.108894
21	6	5.477	Pyruvic acid	TCA	C3H4O3	174	A	10.5706	9.19669	7.93697	7.85987	8.75962	0.572293	0.915163	0.854527	1.4729	0.983074	0.188687	0.207255	0.086715	0.120619	0.104762	0.156191	0.0782652	0.0419622	0.104214	0.101424	0.00837158	0.00623305	0.0565147	0.0299656	0.0151262	0.626226	0.759206	0.837784	1.68491	1.1788	0.132146	0.173013	0.0943564	0.158278	0.153479	0.0136918	0.0232892	0.0248018	0.0142134	0.0188556	0.00753703	0.00651992
22	7	5.532	Butylsemithiocarbazide	unspecified	C5H13N3S	147	D	1.89724	2.01771	2.03998	1.45849	3.57922	0.939191	1.2666	1.0082	1.67014	1.19739	0.927054	0.875696	0.876699	0.962965	1.2023	0.801969	0.683203	0.661838	0.704368	0.795449	0.538959	0.629337	0.654114	0.788628	0.706676	1.03729	1.11493	1.54084	1.83354	1.28987	0.774886	0.919631	0.793443	0.919932	0.911005	0.85102	1.02034	0.824639	0.996468	1.1353	0.714399	0.704569
23	8	5.859	Hydantoic acid	unspecified	C3H6N2O3	181	D	1.46206	1.48812	1.15193	1.1819	1.48128	1.3311	1.25487	1.66925	1.35227	1.0972	1.37964	1.04247	1.44219	0.975032	1.24933	1.01738	0.949948	0.922583	1.39039	1.45457	1.25813	1.2591	1.46499	1.84484	1.55718	1.27246	1.4259	1.32524	1.76144	1.37899	1.31677	1.57022	1.73049	1.20568	1.6914	1.33664	1.08514	1.69564	1.75232	1.87807	0.852542	0.856777
24	9	6.283	Acetic acid	unspecified	C2H4O2	147	D	0.619655	0.572168	0.663662	0.642328	0.584933	1.04445	1.34678	1.47077	1.53325	0.807373	1.33848	1.50451	1.72641	1.01437	1.11274	1.5603	1.20459	0.888333	0.918325	0.943408	0.619031	0.553066	1.00312	0.980809	0.548782	1.17442	1.3225	2.03392	1.72293	1.56771	1.02348	1.40052	1.39829	0.904311	0.931536	0.91779	1.0956	1.11461	0.759439	0.323753	0.275998	0.253504
25	10	6.401	Aminobutyric acid	Organic acid	C4H9NO2	130	A	2.57362	2.22071	2.67963	2.13529	1.60099	1.67299	2.60464	2.03553	2.33184	1.44124	1.01295	0.868744	0.95237	0.714045	0.962466	0.611488	0.371768	0.327199	0.360078	0.329258	0.260377	0.210361	0.516504	0.376019	0.233808	2.29345	2.57867	2.99773	3.25106	2.94094	0.595813	0.835599	0.861039	0.601658	0.660309	0.560608	0.715905	0.706473	0.370241	0.367517	0.215077	0.189438
26	11	6.644	Oxalacetic acid	TCA	C4H4O5	147	A	0.033941	0.0335031	0.207259	0.109662	0.136421	0.942532	0.90835	0.850913	0.669711	1.41173	1.24713	1.3265	1.28805	1.38074	1.54758	1.30399	1.38127	1.39509	1.38631	1.46117	1.6235	1.46638	1.5501	1.59372	1.47425	0.936729	0.782374	0.733586	0.75844	1.0421	1.06623	0.912751	1.23848	0.850146	1.00122	0.86508	0.98383	1.32815	1.25932	1.65164	1.03735	1.04396
27	12	6.95	Butanoic acid	unspecified	C4H8O2	130	D	0.0339872	0	0	0.0107412	0	0.793409	0.673652	0.60712	0.357667	0.286647	1.95026	1.74024	1.57159	0.913486	0.96607	2.51585	1.85823	1.3542	1.40085	1.48582	1.32454	0.660827	1.88853	1.44686	0.827877	0.93561	0.811524	0.473737	0.363118	0.479668	1.25801	1.39652	2.45253	0.513175	0.438467	2.36419	3.01588	4.32503	2.04035	1.88437	2.55609	2.33181
28	13	7.186	Valine	Amino acid	C5H11NO2	144	A	1.97722	1.8503	2.16522	1.73383	1.2168	1.01832	1.40809	1.28523	1.31714	0.804088	1.19103	1.09736	1.39659	0.958202	1.10275	1.06913	0.812502	0.604575	0.738395	0.767787	0.555936	0.382032	1.05562	0.869307	0.47274	1.24848	1.30057	1.70817	1.66216	1.64718	0.806961	1.02304	1.63967	0.779672	0.829184	1.10449	1.36202	1.39237	0.88377	0.896301	0.379539	0.311276
29	14	7.436	Ethanimidic acid	unspecified	C2H5NO	147	D	2.17422	2.72337	3.96819	2.64265	2.4453	1.37687	2.16434	2.7694	2.58675	2.20096	0.773253	0.847952	1.19108	1.04843	1.03398	0.448675	0.436627	0.544337	0.344819	0.43759	0.19253	0.202651	0.310843	0.299759	0.269157	1.53639	2.04916	2.73133	2.98819	2.68506	0.729157	1.06241	0.943133	0.995663	1.12313	0.433012	0.841446	0.963133	0.615904	0.550843	0.289157	0.254458
30	15	7.624	Ethanolamine	Others	C2H7NO	174	A	0.524166	0.575192	0.910033	0.630472	0.533037	1.51414	1.93456	1.87933	2.22886	1.39436	1.6717	1.55555	2.69738	2.09198	2.19415	1.77588	0.904075	0.741363	0.985455	1.04686	0.412845	0.335039	0.746908	0.807087	0.418373	0.332408	0.242536	0.245797	0.548843	0.670923	0.399637	0.61834	0.642174	0.570012	0.604156	0.864485	0.776981	0.964088	0.734792	0.77463	0.410892	0.355645
31	16	7.77	Carbonic acid	unspecified	CH2O3	228	D	1.04179	1.04623	1.08232	0.983936	0.933813	1.04263	1.09491	1.11758	1.12237	1.18581	0.944905	0.990771	1.10852	1.04503	1.06674	1.08844	1.01092	0.964151	0.921462	0.895321	0.959414	0.891784	0.921162	0.82865	0.860787	1.07375	1.07837	1.10996	1.04239	1.1078	0.934413	1.00564	0.936691	1.11218	0.976681	1.00144	1.01931	0.832308	0.959054	0.925299	1.04557	0.911749
32	17	7.895	Glycerol	Carbohydrates	C3H8O3	147	A	3.11008	3.00737	3.02626	2.78149	2.8379	1.39482	1.9732	1.95065	2.28029	1.29947	1.4304	1.41109	1.54632	0.955344	1.30852	1.54088	1.20148	0.978749	0.797875	0.862247	0.516992	0.327734	0.772687	0.607337	0.40497	0.224988	0.244391	0.378997	0.35663	0.298779	0.135316	0.185703	0.0732277	0.121336	0.12663	0.0114828	0.00936256	0.0100589	0.007647	0.0051096	0.00183136	0.00180113
33	18	7.978	2-Carboxycinnamic acid	unspecified	C10H8O4	117	D	0.0495358	0.311132	0.0691143	0.127142	0.124311	0.654816	0.237772	0.470354	0.292025	0.535852	1.08884	1.09938	1.0327	0.601192	0.760493	0.925219	1.2244	0.876233	0.979158	0.959265	0.87474	0.433085	1.02382	0.940316	0.491741	0.898564	1.0706	1.38284	1.36876	1.07438	1.10944	1.44299	1.47381	0.870179	1.08963	1.39424	1.96162	2.47467	1.53482	2.15725	1.97852	1.23541
34	19	8.096	Methyl phosphate	unspecified	CH5O4P	241	D	1.1959	0.97892	1.70288	0.798356	0.490286	0.402365	0.110459	0.173235	0.0607914	0.762826	0.0738275	0.0627903	0.142426	0.149277	0.103463	0.0698442	0.0562867	0.0558957	0.108358	0.115717	0.0606755	0.0599223	0.073277	0.0768547	0.0727266	0.314227	0.300394	0.397802	0.39983	0.303711	0.0404697	0.0701049	0.0464083	0.111038	0.114587	0.0730598	0.0446702	0.0386301	0.0536506	0.0413532	0.0260431	0.0228131
35	20	8.18	Malonic acid	Organic acid	C3H4O4	233	A	1.55688	1.78438	2.37748	2.08036	1.87267	0.823995	1.21109	1.41256	1.55914	1.92869	0.595925	0.839842	1.27108	1.34295	1.28636	0.324844	0.573288	0.707414	0.751556	0.861347	0.415393	0.4618	0.667233	0.775325	0.848331	0.736842	0.817204	1.12733	0.980192	1.36446	0.486701	0.760611	0.86644	1.2326	1.24335	0.465195	0.770798	0.906055	1.00509	1.19242	0.337861	0.481041
36	21	8.312	Leucine	Amino acid	C6H13NO2	158	A	0.482194	0.491176	0.543358	0.46035	0.361264	0.938424	1.4541	1.18545	1.13345	0.624024	1.6461	1.51563	2.07245	1.31383	1.30241	1.77498	1.42202	1.08904	1.22925	1.31685	0.972668	0.635368	1.82038	1.58901	0.861369	0.924968	1.06946	1.38422	1.23861	1.31888	0.798447	0.962208	1.86124	0.876137	0.889768	1.60687	1.93993	2.10694	1.39584	1.38099	0.467112	0.384339
37	22	8.777	Isoleucine	Amino acid	C6H13NO2	158	A	0.387701	0.395614	0.407823	0.35886	0.266589	0.853926	1.36328	1.1211	1.03112	0.545036	1.61271	1.49069	1.97044	1.24308	1.33592	1.66992	1.34985	1.02055	1.1971	1.23477	0.990419	0.653759	1.89963	1.58556	0.808814	0.883478	1.01354	1.29629	1.16347	1.1751	0.852123	1.00983	2.06656	0.88194	0.935453	1.66769	2.06174	2.28603	1.48579	1.52313	0.537304	0.43888
38	23	8.972	Glycine	Amino acid	C2H5NO2	174	A	1.01085	1.00212	1.3545	1.01325	0.644757	1.83066	2.59026	2.27615	2.1772	1.34847	1.30863	1.21645	1.54298	1.22059	1.30206	1.1159	0.83005	0.588798	0.685128	0.697762	0.331767	0.166927	0.573394	0.488357	0.301619	1.57573	1.78556	2.45719	2.15331	2.15622	0.732077	1.10444	0.924339	0.82854	0.746897	0.928848	1.06976	1.00895	0.576936	0.593834	0.220735	0.182152
39	24	9.257	Phosphate	Organic acid	H3PO4	299	A	1.41703	1.35044	1.30545	1.29132	1.27053	0.927009	1.27561	1.19	1.37027	0.858814	1.00154	1.00681	1.01068	0.770602	0.922103	1.04479	0.900114	0.807744	0.676056	0.703722	0.72214	0.568726	0.8457	0.763784	0.54159	0.97289	0.998848	1.16826	1.18555	1.11456	0.84896	0.845931	0.896804	0.715242	0.740032	0.747502	0.955699	1.0312	0.818048	0.951279	0.865603	0.654625
40	25	9.43	Proline	Amino acid	C5H9NO2	142	A	0.575921	0.402059	0.621741	0.442752	0.122259	1.68797	1.68202	1.59922	1.07183	0.725433	2.15583	1.86757	2.19215	1.27985	1.39563	2.05239	1.76774	1.42101	1.39045	1.49397	1.48493	0.998299	2.46695	1.97693	0.959345	1.07124	1.10824	0.869591	0.825397	0.983876	1.14684	1.15333	1.8199	0.769039	0.841649	2.21545	2.40413	2.68178	1.56189	1.57011	0.883528	0.80867
41	26	9.639	Oxiranecarboxylic acid	unspecified	C3H4O3	189	D	1.96456	2.14203	2.16738	1.69911	2.07542	0.734226	1.20896	1.65387	1.5629	0.971345	0.878387	0.721301	1.05585	0.996698	1.00565	0.944999	0.585094	0.595533	0.555765	0.706388	0.649221	0.369847	0.985264	0.810283	0.480205	1.1339	1.09214	1.36307	1.65835	1.76324	0.629833	0.695451	0.912687	0.625857	0.705394	0.732237	0.903739	0.619891	0.706885	0.990733	0.510528	0.281362
42	27	9.924	2-Quinolinecarboxaldehyde	unspecified	C10H7NO	188	D	2.56297	4.53386	6.2326	8.03441	6.39703	0.424161	1.38544	1.35506	2.7822	1.84828	0.14521	0.19746	0.442841	0.613215	0.663453	0.0945319	0.0572535	0.0666742	0.0775814	0.0760918	0.0143362	0.0123146	0.0450544	0.0565422	0.0282225	0.541136	1.06342	3.37681	3.00535	2.8317	0.0634245	0.185458	0.142611	0.520599	0.331897	0.058202	0.108774	0.0852875	0.0877863	0.0923279	0.00797063	0.0105819
43	28	10.049	Serine	Amino acid	C3H7NO3	204	A	0.94423	0.91093	1.06962	0.936884	0.705831	0.770875	1.15732	1.03505	0.98964	0.612736	1.24168	1.17443	1.60686	0.880119	1.12492	1.19271	0.965829	0.678751	0.816224	0.885923	1.2479	0.964411	2.46104	1.93618	0.907931	0.986572	0.999654	0.947105	1.36695	1.3486	0.722111	0.864471	1.35952	0.78502	0.918453	1.09551	1.60175	1.98652	1.33402	1.58994	0.801439	0.612335
44	29	10.104	1H-Indole-3-ethanamine	unspecified	C10H12N2	174	D	0.967728	0.991423	1.02312	0.949001	0.91927	1.08296	1.04529	1.04745	1.09191	1.07757	1.05295	1.01682	1.07505	1.04198	1.04384	1.05155	1.03632	0.933537	0.954129	0.895225	1.0065	0.920527	1.0119	0.989897	0.913563	1.09016	1.03508	1.04594	1.00754	1.08064	1.02674	1.07754	1.09989	1.04601	1.02341	1.06884	1.09592	1.08627	1.04515	1.05037	1.01685	0.917983
45	30	10.285	Succinic acid	TCA	C4H6O4	147	A	1.3328	1.33751	1.41104	1.26095	1.14793	1.09008	1.75609	1.54954	1.85841	0.932177	1.13224	1.06969	1.20814	0.862092	0.989341	1.29623	0.848259	0.664538	0.621068	0.65233	0.405417	0.366135	0.839006	0.692067	0.407971	1.12194	1.33136	2.01527	1.63412	1.58644	0.914048	1.03228	1.01626	0.717699	0.743709	0.737445	1.09771	1.0393	0.621638	0.748849	0.500679	0.336193
46	31	10.327	Mandelic acid	unspecified	C8H8O3	107	D	0.995	1.00048	1.05797	0.986537	1.0088	0.988247	0.993574	1.01751	1.04655	1.08085	0.995235	1.0159	1.04556	1.04839	1.03547	1.07945	1.0768	1.01894	1.05103	1.01166	1.05318	1.00494	1.01407	1.04051	1.0139	1.04226	1.01806	1.02175	1.03596	1.03422	0.990331	1.0526	1.06299	1.0487	1.03839	1.02948	1.05567	1.05907	1.05709	1.05048	1.06685	1.01323
47	32	10.375	Threonine	Amino acid	C4H9NO3	218	A	0.750725	0.771768	0.931504	0.797751	0.604533	1.08169	1.57498	1.3261	1.2437	0.739718	1.50786	1.4419	1.84885	1.25316	1.49687	1.36385	1.0316	0.77987	0.896642	0.908979	0.692825	0.494114	1.29182	1.04158	0.549988	1.31227	1.40782	1.72764	1.78112	1.73353	0.834875	1.11876	1.97017	0.97406	1.0053	1.22684	1.82423	2.03924	1.45136	1.51271	0.577854	0.480989
48	33	10.48	Fumaric acid	TCA	C4H4O4	245	A	2.85864	2.70675	3.25819	2.76985	1.64288	2.10718	1.95353	2.01931	1.8471	2.13752	1.18677	0.983061	1.82267	1.6362	1.5214	1.04931	0.608922	0.471964	0.814628	0.791095	0.257257	0.213407	0.506898	0.516811	0.254835	1.36882	1.72268	2.58874	1.97715	1.94715	0.497545	0.73793	0.593686	0.706554	0.661424	0.203313	0.209186	0.243008	0.253373	0.179709	0.0458018	0.0326395
49	34	10.528	2-Methylacetoacetic acid	unspecified	C5H8O3	157	D	0.939655	0.821839	1.06645	0.974258	0.864104	0.725216	1.05292	1.03927	0.883022	0.976892	1.16499	0.984195	1.03412	1.14128	1.16523	1.1608	1.08405	0.874162	0.846264	0.850096	1.05939	0.988625	1.0364	1.0249	0.896432	1.08824	0.914631	1.22258	1.02407	1.12787	0.938218	1.0164	1.14104	1.00982	0.996648	1.04777	0.9375	0.994492	1.10105	1.04658	0.983118	0.648587
50	35	10.577	Pipecolic acid	Organic acid	C6H11NO2	156	A	0.325695	0.205003	0.332226	0.242668	0.0261209	1.38418	0.98898	1.26488	0.691621	0.70958	1.65098	1.40738	1.61891	1.10921	1.0474	2.59448	1.91079	1.4005	1.58766	1.77867	1.99405	1.39129	2.92543	2.29887	1.22314	0.902921	0.79284	0.472975	0.468544	0.652207	0.396712	0.423182	1.20926	0.180631	0.223194	0.559034	1.25019	2.15824	1.68935	2.08174	2.35916	1.40575
51	36	10.938	Nicotinic acid	Organic acid	C6H5NO2	180	A	0.433471	0.44991	0.432606	0.282059	0.321859	0.436932	0.418763	0.430876	0.675731	0.104691	0.621222	0.520858	0.891169	0.521723	0.776961	0.859156	0.770904	0.36512	0.528645	0.714665	0.814165	0.414437	0.899821	0.858291	0.379828	0.680057	0.682652	0.762252	1.02095	0.882517	0.491441	0.808973	0.972499	0.674	0.75533	1.23293	1.14381	1.81262	1.56776	1.92856	1.18188	0.800321
52	37	11.07	Pentadecanoic acid	unspecified	C15H30O2	256	D	12.9125	13.3372	9.97019	8.22864	7.03821	0.990552	2.90993	1.94583	3.3185	1.16691	0.614319	0.643712	1.20218	0.311568	0.396809	0.698089	0.443838	0.383582	0.415914	0.514382	0.313038	0.268948	1.07432	1.13164	0.242494	0.795087	1.31535	1.61663	2.9114	1.36826	0.164602	0.158723	0.142557	0.0352719	0.0543775	0.177829	0.0176359	0.160193	0.155784	0.373294	0.0440899	0.0396809
53	38	11.147	Uracil	Others	C4H4N2O2	241	A	2.02645	2.06047	2.23038	1.6728	1.48052	1.37971	1.92006	1.76865	1.84981	1.17196	1.35102	1.2898	1.53017	1.11788	1.35427	1.07631	0.615892	0.443065	0.556191	0.611379	0.485697	0.314019	0.790361	0.696397	0.342372	0.684785	0.753268	1.10774	0.993921	1.10085	0.620693	0.685401	0.985346	0.515651	0.582779	0.751586	1.02383	1.33391	0.791551	1.11123	0.914976	0.51881
54	39	11.223	beta-alanine	Amino acid	C3H7NO2	174	A	0.543286	0.526842	0.576143	0.546487	0.488713	1.00181	1.24383	1.10361	0.989256	0.797543	1.46269	1.39352	1.46385	1.12059	1.32326	1.20419	0.924766	0.816749	0.838057	0.826289	0.668061	0.502019	0.836206	0.8674	0.554678	1.3462	1.40174	1.75592	1.71908	1.6185	0.989131	1.28447	1.45434	1.00065	0.957309	1.11485	1.51148	1.70251	1.20184	1.12969	0.798453	0.733869
55	40	11.348	Acrylanilide	unspecified	C9H9NO	228	D	1.13771	1.11443	1.12761	1.06787	1.04063	1.15572	1.09378	1.16802	1.21195	1.21546	0.964639	1.08148	0.990995	1.14342	1.1175	1.09906	1.06479	0.952778	0.916319	0.872831	0.9396	0.827586	0.948386	0.901823	0.924665	1.21458	1.11882	1.13947	1.11531	1.20668	1.06567	1.11179	1.16934	1.21942	1.15133	1.05118	1.08895	1.04986	1.08017	1.11136	1.05161	0.939161
56	41	11.397	Rhamnose	unspecified	C6H12O5	117	D	0.167719	0.187393	0.181544	0.111205	0.104521	0.94137	1.33264	1.12064	0.868828	0.525414	1.25075	1.31783	1.37746	0.762333	1.08448	1.07521	0.796515	0.559596	0.74904	0.684474	0.269505	0.10999	0.393396	0.565825	0.24216	2.35544	2.39767	2.64355	3.19358	2.73979	1.12428	1.85182	1.92626	1.25721	1.29147	1.41399	1.83747	2.13872	1.4882	1.06617	0.285837	0.467609
57	42	11.585	Threose	unspecified	C4H8O4	205	D	3.73115	3.68977	2.90787	2.91215	3.33734	0.676315	2.00183	1.15145	2.91358	0.500815	1.07583	1.06726	1.02874	0.710558	0.552181	1.34264	0.639217	0.757644	0.233999	0.228292	0.278231	0.0584998	1.06726	0.821851	0.0684876	0.682022	0.763351	1.18569	1.99898	0.911741	0	0.191194	0	0.0955972	0.0299633	0.0927436	0.26967	0.235426	0.198329	0.622095	0.589278	0.0214024
58	43	11.626	Homoserine	Amino acid	C4H9NO3	218	A	5.1054	4.87639	5.58644	4.24355	2.98493	2.33953	2.52509	2.62559	2.54315	2.02363	0.482876	0.425821	0.513497	0.359343	0.531556	0.39677	0.18556	0.154939	0.201264	0.196814	0.126411	0.0761609	0.265909	0.185037	0.0643835	1.7059	1.736	2.1982	2.63475	2.1804	0.323226	0.479997	0.291296	0.373215	0.366148	0.154154	0.178494	0.197338	0.167763	0.135833	0.0277425	0.0497271
59	44	11.724	Meso-erythritol	Carbohydrates	C4H10O4	217	A	0.636181	0.873655	0.79483	0.646765	0.867046	1.56481	2.07879	1.9891	1.95364	1.30624	1.53325	1.46969	1.69019	1.04461	1.34303	1.53676	1.43645	1.0941	1.10916	1.21355	1.7889	1.40182	2.50157	2.31578	1.31157	0.5271	0.592096	0.951049	0.947734	0.796831	0.280245	0.312284	0.358884	0.240168	0.26449	0.455542	0.571533	0.645933	0.410143	0.585444	0.409323	0.256592
60	45	11.897	Pentitol	unspecified	C5H12O5	117	D	0.836072	1.0035	1.12263	0.947333	0.961286	1.15447	1.60453	1.64209	1.56267	0.516955	1.64961	1.4278	1.52403	0.762732	0.950911	1.92436	1.71472	1.23354	1.42386	1.55802	1.05716	0.519459	1.64603	1.54836	0.761659	0.992053	1.19919	1.61991	1.62456	1.35589	0.508369	0.567756	0.552373	0.396392	0.447908	0.677229	0.629648	0.868985	0.63716	0.645389	0.609971	0.39353
61	46	11.96	Methylaminopropionic acid	unspecified	C10H13NO3	160	D	11.7043	20.3179	14.1387	11.0821	23.6585	1.56444	4.33301	3.2825	5.51378	1.41649	1.9283	1.28199	1.79876	0.579764	1.63382	0.253426	0.390757	0.126005	0.615159	0.467917	0.165647	0	0.649138	0.724175	0	1.28341	2.07696	4.82075	14.4722	4.32593	0.438894	1.22041	1.05972	0.458715	0.785053	0.318552	0.841685	1.1836	0.911058	0.85018	0	0
62	47	12.217	Mesitylglyoxylic acid	unspecified	C11H12O3	247	D	1.00532	1.00825	1.01549	0.862304	0.796123	0.463949	0.71176	0.612929	0.720754	0.382812	0.395129	0.328557	0.457302	0.267655	0.307931	0.374502	0.274401	0.179577	0.171268	0.188473	0.132557	0.103328	0.249864	0.166967	0.0982446	3.05516	3.69595	5.14108	5.05789	4.3822	1.50143	1.50573	2.35259	1.12224	1.07228	1.1108	1.80565	2.0473	1.25636	2.20967	1.20259	0.640594
63	48	12.557	Phenoxathiin	unspecified	C12H8OS	232	D	4.65639	8.30782	9.68248	5.46484	10.6102	1.44408	4.89233	3.45383	7.61268	3.59279	0.867001	1.10567	1.6594	1.56113	2.51697	0.28716	0.250521	0.233237	0.40884	0.403749	0.0805543	0.0752914	0.255381	0.344966	0.176639	1.07605	2.17137	5.49688	7.56768	5.24589	0.21368	0.519534	0.475302	0.604862	0.731201	0.119753	0.338984	0.403548	0.40605	0.490803	0.0293918	0.0296794
64	49	12.724	Malic acid	TCA	C4H6O5	245	A	1.24833	1.26158	1.46861	1.2666	0.927389	1.37145	1.81598	1.74869	1.966	1.3026	1.36948	1.2817	1.8307	1.40125	1.4777	1.6656	1.02192	0.751495	0.92459	0.948856	0.520837	0.445159	1.03154	0.893142	0.472874	1.07586	1.29334	1.71259	1.67295	1.5381	0.785431	0.909963	0.985021	0.759429	0.777488	0.523291	0.814363	0.89124	0.628385	0.758724	0.390542	0.253077
65	50	12.724	Urea acid	Organic acid	CH4N2O	171	A	1.24453	1.25344	1.44039	1.25281	0.915716	1.34697	1.77579	1.6846	1.92465	1.2743	1.34293	1.25501	1.75207	1.35193	1.43748	1.61292	0.991777	0.750274	0.927067	0.952504	0.520224	0.447218	1.0006	0.898068	0.490139	1.06503	1.2606	1.64977	1.61748	1.5113	0.800054	0.902669	0.972496	0.743524	0.759446	0.523654	0.814554	0.887662	0.623847	0.752602	0.383867	0.256448
66	51	12.773	Threonic acid	Organic acid	C4H8O5	292	A	1.63994	1.47635	1.39879	1.35578	1.00507	1.16608	2.01418	1.7017	1.85721	1.15947	1.24071	1.39658	1.57671	0.978599	1.20064	1.31938	0.983746	0.778615	0.721634	0.868682	0.596644	0.39666	0.869784	0.777145	0.430848	1.3635	1.68737	1.90794	2.3329	2.10461	0.708768	1.08227	1.01463	0.755088	0.76391	0.603629	0.830082	0.866843	0.672373	0.806186	0.237849	0.307696
67	52	13.065	GABA	Amino acid	C4H9NO2	174	A	2.28815	2.52414	2.87416	2.32314	1.37893	1.40625	1.99052	1.94997	1.9184	1.2351	0.764406	0.735613	1.05483	0.608926	0.69464	0.765177	0.720358	0.557165	0.613732	0.653421	0.747277	0.607466	1.48863	1.20606	0.533843	1.37894	1.52554	1.44236	1.93815	1.84696	0.505292	0.668055	0.604567	0.553087	0.597563	0.51374	0.553641	0.698609	0.442536	0.552966	0.307977	0.252046
68	53	13.072	trans-4-hydroxy-L-proline	Amino acid	C5H9NO3	230	A	2.32446	2.50964	3.02562	2.39582	1.42513	1.42419	2.02939	2.02397	2.00293	1.20647	0.743522	0.74932	1.09583	0.607724	0.703961	0.785514	0.738378	0.544688	0.624091	0.599307	0.807025	0.683946	1.47928	1.2118	0.542911	1.39165	1.56691	1.44804	2.02799	1.9542	0.487732	0.696105	0.609314	0.561055	0.630637	0.520278	0.596033	0.721076	0.485206	0.566105	0.331732	0.252049
69	54	13.231	Aspartic acid	Amino acid	C4H7NO4	232	A	0.897747	1.11003	1.12593	0.929894	1.04793	1.00365	0.984367	1.04286	1.38831	1.098	1.28005	1.152	1.29036	0.991365	1.42665	1.03511	0.628174	0.422607	0.680484	0.608234	1.14081	0.770364	2.60318	1.71558	0.769075	2.00267	1.80175	2.13671	2.89062	2.91581	0.915525	1.38939	1.25997	1.1807	1.31103	0.609917	0.692372	0.803224	0.557819	0.491694	0.269723	0.249378
70	55	13.753	Methionine	Amino acid	C5H11NO2S	176	A	0.898808	0.928761	1.01077	0.955409	0.792215	1.36236	1.97527	1.88293	1.85525	1.14381	1.36815	1.21714	1.47433	0.890751	1.11489	1.12294	0.862657	0.711857	0.777961	0.800065	0.593697	0.471611	1.04713	0.967804	0.453432	1.45243	1.4671	1.75775	1.91061	1.89243	0.876911	1.16653	1.27663	1.05519	1.05684	0.748834	0.951691	1.09567	0.734787	0.786018	0.415422	0.249129
71	56	13.864	1,3-Diaminopropane	Others	C3H10N2	174	A	0.793028	0.930577	0.95052	0.609729	0.633777	1.20274	2.3131	2.08639	2.40929	0.761354	2.25297	1.95236	1.90837	1.27753	1.93301	1.62418	0.758715	0.589199	0.544327	0.381557	0.176848	0.122298	0.352815	0.32818	0.0527903	1.16432	0.821183	0.952279	0.983953	1.2875	2.83338	2.39316	3.53226	1.38135	1.91512	1.67492	1.95676	4.04051	1.67316	2.17526	1.22591	0.40238
72	57	13.898	Cysteine	Amino acid	C3H7NO2S	220	A	0.0633423	0.0660377	0.169137	0.100116	0.0591067	0.406045	1.05651	0.669908	0.954178	0.265787	0.818733	0.81392	0.719677	0.392183	0.482191	0.653254	0.431074	0.262996	0.301405	0.268772	0.173277	0.0697921	0.16779	0.161147	0.100019	0.855699	0.749422	1.08962	0.987967	0.876203	1.08394	1.14411	1.53668	0.863593	0.800443	1.19128	2.24865	2.49528	1.57874	2.71044	2.30554	1.18955
73	58	14.169	Hydroxyglutaric acid	unspecified	C5H8O5	129	D	1.86471	1.83069	1.93389	1.53133	1.26369	1.31022	1.83335	1.71639	1.73052	0.979645	0.955875	0.829494	0.978471	0.717791	0.762681	0.867154	0.570274	0.398149	0.43096	0.471689	0.255395	0.183432	0.491299	0.415292	0.21574	2.22643	2.51261	4.02515	3.15714	2.91512	0.972851	1.29479	0.836473	0.843333	0.779522	0.809851	0.968708	1.00065	0.555563	0.622393	0.323484	0.207336
74	59	14.267	Arginine	Amino acid	C6H14N4O2	142	A	0.152762	0.219713	0.373042	0.21977	0.167546	1.43366	1.79956	1.8238	1.53538	0.894541	0.224301	0.212633	0.269897	0.184652	0.252395	0.203343	0.108695	0.103711	0.0972537	0.122289	0.0665539	0.0444637	0.195414	0.156841	0.0658176	6.43109	5.93055	5.65963	6.25108	6.61093	5.14068	7.76075	2.24425	5.45697	5.78436	5.25153	2.70028	2.26697	0.974859	0.781032	0.470919	0.459817
75	60	14.364	4-(3-Fluorophenyl)pyrimidine	unspecified	C10H7FN2	174	D	3.87272	2.61405	1.97163	1.46144	1.18532	1.47639	2.43885	2.30008	2.22533	1.25073	1.14467	0.654096	0.864809	0.878825	0.910596	0.616252	0.524212	0.381245	0.287802	0.362089	0.382179	0.282663	0.612515	0.692408	0.153245	2.14871	2.29775	3.33636	5.20661	3.64332	0.556916	0.899383	0.790522	0.760621	0.68026	0.568129	0.790522	0.670916	0.245286	0.273786	0.118672	0.0686801
76	61	14.461	2-Butenoic acid	unspecified	C4H6O2	245	D	1.64209	1.39351	1.85638	1.37637	0.85227	1.4278	2.04741	1.74495	1.29677	1.10575	1.25759	1.03595	1.7523	1.21718	1.19636	1.10207	0.901251	0.844923	1.20738	1.02493	0.331846	0	1.02125	0.803289	0.264498	2.45028	2.61436	3.03927	3.97481	3.31602	0.887781	1.26983	0.642876	1.14616	1.02125	0.607365	0.473891	0.47634	0.317152	0.304907	0	0
77	62	14.454	Arabinose 1	Carbohydrates	C5H10O5	103	A	2.22852	1.84464	1.4149	1.47903	1.44081	0.820832	1.52913	1.47945	1.91598	0.404683	1.10789	0.766478	0.874761	0.785586	0.79875	1.35376	0.782189	0.622524	0.578361	0.631866	0.298523	0.262853	0.600867	0.419546	0.470078	1.09685	1.31384	1.55334	1.56056	1.49559	0.611484	0.69896	0.608511	0.459037	0.386424	0.575389	0.603415	0.804695	0.570718	0.824653	0.565622	0.39704
78	63	14.496	Arabinose 2	Carbohydrates	C5H10O5	103	A	2.71149	2.43422	1.86747	1.68476	1.41463	0.848609	1.93362	1.85574	1.14873	0.725272	1.16747	1.2023	1.77412	0.404232	0.765417	1.42491	0.758767	0.43821	0.534946	0.365296	0.683192	0.423337	1.01028	0.828658	0.352721	0.895405	0.973035	1.88501	1.31354	1.28948	0.298549	0.415961	0.347037	0.377509	0.340145	0.301572	0.784401	0.513422	0.681258	0.903869	0.499516	0.448851
79	64	14.496	Xylitol	Carbohydrates	C5H12O5	217	A	1.94893	2.53859	4.66104	1.86297	1.72118	3.24233	0.882481	0.445458	2.53176	3.96855	0.549894	1.8224	1.04436	0.35468	6.38142	0.910197	0.852356	0.775636	0.516153	0.612154	0.561944	0.274746	0.44345	0.662363	0.245825	6.66942	9.97119	11.8727	12.8934	11.5269	3.12383	5.31818	4.07741	3.3086	4.23687	2.20881	3.52751	4.31319	2.21966	3.39858	2.36828	0.627819
80	65	14.663	Arabitol	Carbohydrates	C5H12O5	217	A	0.679343	0.76125	0.851411	0.749832	0.715478	1.47823	1.89367	1.88869	1.6811	1.22045	1.7989	1.70513	2.01393	1.35362	1.68884	2.01183	1.86528	1.52886	1.61558	1.76844	1.52258	1.17625	2.19368	1.99402	1.23718	0.45754	0.507302	0.69035	0.772603	0.690972	0.159314	0.200044	0.185645	0.135052	0.146596	0.198104	0.330948	0.359251	0.255134	0.311873	0.289572	0.164516
81	66	14.732	Glutamine 1	Amino acid	C5H10N2O3	156	A	2.25284	3.04527	2.9328	3.51483	5.07083	1.52628	2.77941	2.71022	3.21508	1.85071	0.283168	0.27265	0.38122	0.289543	0.395362	0.22534	0.207159	0.156213	0.188334	0.220473	0.212294	0.131746	0.472268	0.427756	0.163892	2.40739	4.1768	4.91252	7.06463	5.23928	0.653558	1.07688	0.256749	1.01059	0.779977	0.658276	0.565838	0.417378	0.237025	0.260467	0.142841	0.126596
82	67	14.795	Glutamic acid	Amino acid	C5H9NO4	246	A	1.88947	1.51516	1.452	0.816851	0.557743	2.18471	2.31481	2.23286	1.7062	1.52698	1.17621	1.0164	1.02041	0.745904	1.12198	0.787103	0.559947	0.376499	0.474506	0.567032	0.579899	0.341508	1.01101	0.991986	0.427849	2.49582	2.60355	2.34247	3.20077	3.07622	0.742251	1.22449	0.802118	0.678271	0.739114	0.792065	0.739575	0.630443	0.308871	0.286391	0.103299	0.103707
83	68	14.864	2-Furancarboxylic acid	unspecified	C5H4O3	271	D	2.05323	2.38389	1.82203	1.75744	1.93642	1.01134	1.71935	1.54292	1.86335	0.930328	1.01296	0.860483	0.963972	0.578275	0.820648	0.929386	0.680688	0.528348	0.503855	0.495107	0.576526	0.342363	1.01888	0.870307	0.361742	1.16382	1.31468	1.92377	1.75313	1.75192	0.643545	0.747438	0.784043	0.582582	0.599808	0.689032	0.852004	0.961684	0.62282	0.830068	0.508834	0.344516
84	69	14.982	Carbamic acid	unspecified	CH3NO2	179	D	1.46314	1.33456	1.67469	1.41286	1.25243	1.03932	1.74006	1.46398	1.58993	1.12624	0.960303	0.943302	1.30738	0.790535	0.87051	1.16994	0.816994	0.677516	0.653571	0.690566	0.661832	0.482606	0.909899	0.832199	0.357854	1.19233	1.34282	1.44351	1.82016	1.73946	0.494339	0.6325	0.617534	0.741807	0.720497	0.53277	0.661233	0.636092	0.589878	0.671051	0.422026	0.231785
85	70	15.094	Putrescine	Others	C4H12N2	174	A	0.846416	1.00948	1.54402	1.00078	0.643457	0.78884	1.58286	1.51822	1.59361	0.633704	0.484287	0.435807	0.477966	0.353262	0.451939	0.420705	0.253527	0.158197	0.182823	0.155537	0.0726488	0.0417874	0.125648	0.10311	0.0554877	0.893666	0.648205	0.927645	1.07775	1.13564	0.608134	0.763842	0.575499	0.482943	0.459547	0.513204	0.619546	0.603071	0.235508	0.217746	0.193578	0.173299
86	71	15.205	Erythrulose	unspecified	C4H8O4	320	D	0.765447	0.851528	1.20682	0.686961	0.545181	2.38749	3.39514	3.23986	2.40014	1.5714	1.94695	1.68449	2.32081	1.44312	1.57815	1.579	1.07179	0.863343	1.12581	1.36295	0.501296	0.101272	0.944361	0.839713	0.35614	2.52336	2.63645	2.61957	3.36223	3.06094	0.513111	1.41781	0.678522	0.789921	0.698776	0.602568	0.67599	0.575562	0.389053	0.218579	0	0
87	72	15.274	α-Ketoglutaric acid	Organic acid	C5H7NO5	198	A	2.43643	2.25962	2.46916	1.90729	1.38691	0.897971	1.80496	1.80367	3.38595	1.13071	1.08226	1.03277	1.45418	0.685592	0.761626	1.22891	0.782503	0.474244	0.630178	0.780183	0.425016	0.273721	0.948489	0.787658	0.331198	1.37196	1.31706	1.74955	2.30704	1.71785	0.363931	0.577083	0.533267	0.406201	0.385323	0.24537	0.42914	0.507493	0.29099	0.512905	0.227843	0.102581
88	73	15.434	Fenpropidin	unspecified	C19H31N	98	D	1.7093	1.71528	1.68447	1.72349	1.59636	0.865666	1.28888	1.37289	1.4401	0.949115	0.576115	0.664978	1.15391	0.928019	0.883961	0.473064	0.384574	0.416124	0.34649	0.373933	0.199195	0.213009	0.451221	0.487625	0.262481	0.771389	0.931753	1.85006	1.51309	1.40388	0.324088	0.71501	0.788937	0.65807	0.800885	0.431246	0.84513	0.628014	0.590676	0.667031	0.137401	0.130867
89	74	15.497	Phenylalanine	Amino acid	C9H11NO2	218	A	0.364447	0.344598	0.367441	0.327878	0.26463	0.698481	1.14306	0.920655	0.850006	0.457939	1.42774	1.3208	1.81093	1.118	1.17055	1.41395	1.10289	0.769197	0.970075	0.952413	0.781544	0.474794	1.52834	1.2379	0.603341	0.891554	0.909115	1.20503	1.09324	1.21839	1.05176	1.26788	2.46605	1.1469	1.19686	1.93066	2.60448	3.04516	1.95354	1.8547	0.579253	0.451311
90	75	15.587	3,5-Dihydroxybiphenyl	unspecified	C12H10O2	142	D	2.81513	4.30355	3.79399	2.81859	5.04186	1.01741	2.99266	1.9813	3.7819	1.35232	1.05654	1.27694	1.75169	1.16271	2.16861	0.420371	0.483959	0.426989	0.534887	0.582938	0.227593	0.214358	0.815135	1.13883	0.455474	0.823766	1.17451	2.57718	3.51777	2.26183	0.308445	0.587541	0.887354	0.585815	0.793843	0.394763	1.0364	1.35405	1.16875	1.57042	0.101568	0.135232
91	76	15.99	2-keto-1-gluconic acid	unspecified	C6H10O7	292	D	2.83732	2.61455	2.5962	2.43424	1.94728	1.42102	2.06627	1.70459	1.9368	1.06301	1.24175	1.19143	1.69097	0.906286	0.951365	1.25905	1.04414	0.778913	0.890037	0.927777	0.496387	0.307162	0.786776	0.737504	0.361676	1.85713	1.84874	2.38706	3.01292	2.53068	0.695047	0.880602	0.618518	0.654162	0.54199	0.450784	0.448164	0.562432	0.421955	0.450784	0.15463	0
92	77	16.066	Fructopyranose	unspecified	C6H12O6	204	D	20.5281	17.9382	14.2174	12.4967	15.6102	14.517	10.7586	9.34238	5.90341	7.80225	3.02721	6.34755	1.38344	6.78117	10.4566	0.442928	0.474508	0.396368	0.815003	1.10934	0.535238	0.299199	0.34252	0.346569	0.20365	21.1953	13.4028	18.8941	12.1056	18.3965	18.1293	18.437	16.1539	7.41965	15.7304	4.77787	4.56572	9.61931	4.11226	2.56364	0.59192	0.343735
93	78	16.08	Asparagine	Amino acid	C4H8N2O3	116	A	1.2172	1.09224	0.879567	0.735913	0.513309	2.9979	4.5292	3.30952	2.30447	1.07224	1.18896	1.03969	1.20635	0.698268	1.1691	1.21458	0.804276	0.524028	0.67487	0.740619	0.766108	0.477625	1.51875	1.09093	0.546641	1.46176	1.39235	1.60764	1.38647	1.58698	1.57326	1.75364	1.37118	1.21785	1.40542	2.76026	2.3625	2.25767	1.07551	1.03446	0.707026	0.64363
94	79	16.185	Aminoadipic acid	Organic acid	C6H11NO4	260	A	2.06071	2.36113	2.16598	2.05679	1.76693	1.56182	2.00944	1.91804	2.0776	1.3543	1.27528	1.24662	1.43574	0.861144	1.10516	1.07409	0.902769	0.669611	0.727523	0.733556	0.767941	0.540213	1.34646	1.16669	0.54896	1.9832	1.94971	2.25707	2.57378	2.62928	0.710934	0.830981	0.90126	0.709124	0.789659	0.393924	0.742002	0.783626	0.468426	0.613509	0.220489	0.136938
95	80	16.282	Allonic acid	unspecified	C6H12O7	451	D	0.676416	0.342431	0.310582	0.150409	0.0604427	1.39863	1.67775	1.26806	0.497412	0.325228	1.20397	1.13756	1.54478	0.491291	0.525619	2.14564	1.15787	0.749644	0.779478	0.733836	0.999319	0.567929	1.22226	0.956312	0.484084	1.66326	1.18243	0.997692	0.760183	0.68308	0.628914	0.975685	0.892305	0.526006	0.659523	1.55981	1.41552	1.27588	1.12307	1.09184	0.973902	0.488268
96	81	16.33	Tartaric acid	unspecified	C4H6O6	231	D	2.15983	2.19388	1.81017	2.01678	2.16776	0.664534	1.7016	1.43997	2.18868	0.594827	0.934047	0.867069	1.03928	0.459442	0.607954	1.12086	0.697286	0.488078	0.408624	0.457059	0.356939	0.229699	0.644345	0.424437	0.217525	0.713792	1.04864	1.63424	1.79141	1.3503	0.402689	0.428249	0.49371	0.354773	0.347018	0.377258	0.658425	0.175199	0.439037	0.631911	0.539373	0.296937
97	82	16.421	Fructofuranoside	unspecified	C6H11O6	217	D	1.13191	1.03639	1.47143	1.27774	1.02621	0.970124	1.69334	1.57324	1.31796	1.19075	0.5739	0.684188	0.993285	0.979753	0.897251	0.965344	0.746211	0.644296	0.572834	0.602426	0.377808	0.320514	0.61013	0.504088	0.300895	1.29955	1.68157	1.93048	1.90262	2.42766	0.436374	0.573814	0.529348	1.10751	0.980062	0.69846	0.776319	0.490057	0.637813	0.619587	0.319294	0.27622
98	83	16.49	Ribofuranose	unspecified	C5H10O5	217	D	4.21147	4.34631	3.72421	3.41794	3.15551	0.637696	2.34887	2.03805	2.83832	0.947716	0.532311	0.563037	0.717602	0.400557	0.589032	0.336155	0.12946	0.145947	0.124729	0.118734	0.120514	0.0851042	0.0717555	0.0771887	0.0687579	1.22256	1.67187	2.62662	2.44353	2.23819	0.0951275	0.182761	0.0977973	0.218967	0.24365	0.10679	0.117141	0.0761582	0.0829029	0.0977036	0.0884766	0.0696009
99	84	16.727	Ornithine	Amino acid	C5H12N2O2	142	A	0.184621	0.223263	0.31707	0.194861	0.130054	1.57569	2.32719	2.29232	1.957	0.967172	0.762863	0.673364	0.899166	0.578993	0.686332	0.750842	0.455984	0.332371	0.359051	0.394093	0.201491	0.114761	0.468031	0.383812	0.183689	2.77834	1.84483	2.50326	2.7603	2.82429	2.32823	3.03314	3.16741	2.4455	2.66723	2.09023	2.43815	2.79924	1.75658	1.54992	0.337651	0.316982
100	85	16.789	4H-Pyran-4-one	unspecified	C5H4O2	271	D	0.0939945	0.145811	0.0378492	0.110921	0.178826	0.0150759	0.0816435	0.0629731	0.0535872	0.0221652	0.195745	0.208883	0.406151	0.0417723	0.051861	1.25353	4.34359	4.93581	1.09537	2.20202	9.38052	9.19112	13.997	9.64831	4.86632	0.00603332	0.00461285	0.00705167	0.00885464	0.0074309	0.00319728	0.00363372	0.00418131	0.00250421	0.00208412	0.0030044	0.00227864	0.00411429	0.00394756	0.00270854	0.00235546	0.000907204
101	86	16.831	Glycerol-3-phosphate	Carbohydrates	C3H9O6P	357	A	0.281461	0.351733	0.609794	0.309671	0.445438	1.37058	1.59266	1.43309	1.04716	0.924963	1.75427	1.37701	1.68634	0.81189	0.983508	0.883594	0.627805	0.490017	0.597138	0.883594	0.725066	0.374175	1.15743	1.2011	0.504967	1.40323	1.00813	0.776085	1.98849	1.91473	1.29443	1.68473	2.05669	1.15948	1.43927	1.40926	1.34164	2.16849	1.20848	1.1912	0.228182	0.191278
102	87	16.956	Quinic acid	Organic acid	C7H12O6	345	A	4.29581	3.0596	4.88918	4.69139	2.61457	2.48477	4.69139	3.26976	4.82119	2.47241	2.78764	0.91479	0.902428	0.945695	0.840618	0.259603	0.216336	0.30287	0.562472	1.05077	0.179249	0.395585	1.61943	0.896247	0.377042	2.63311	2.83709	3.30684	3.20795	3.63444	2.16336	1.53289	1.434	0.463576	0.673731	0.525386	0.834437	2.81854	0.315232	0.259603	0.222517	0.154525
103	88	17.004	Fructose 1	Carbohydrates	C6H12O6	103	A	1.71473	1.73142	1.62293	1.63131	1.69175	0.69335	1.51323	1.55001	2.31303	0.731331	1.1553	1.04923	1.29895	0.633605	0.761016	1.36651	1.02501	0.714855	0.711052	0.729847	0.122767	0.100587	0.261669	0.235069	0.0976765	1.1303	1.11336	1.87971	1.64352	1.79226	0.467703	0.645229	0.463225	0.463467	0.412428	0.259851	0.459865	0.301885	0.317086	0.343043	0.086036	0.0835011
104	89	17.109	Mannitol	Carbohydrates	C6H14O6	319	A	1.38404	0.262151	1.5083	1.44405	1.3244	1.09047	1.3685	1.26521	1.33219	1.02463	1.00267	0.968193	1.03871	0.884789	0.974862	0.959897	0.885798	0.800098	0.822118	0.845008	0.695617	0.508514	0.889241	0.850898	0.565041	1.00095	1.3777	0.564643	1.51294	1.48559	0.85856	1.00622	0.88416	0.850615	0.866942	0.798631	0.924697	0.987228	0.84597	0.970664	0.729192	0.59077
105	90	17.269	Fructose 2	Carbohydrates	C6H12O6	103	A	4.10333	9.54381	0.255103	1.07925	0.910851	2.40033	1.09355	1.30692	0.417602	1.43846	1.89971	1.84957	2.04436	1.70138	1.52339	2.18401	1.44244	1.63826	1.7987	1.66893	0.528344	0.402119	1.10166	0.755135	0.6904	2.26231	1.09842	1.18173	1.69518	1.67041	1.6272	1.83217	1.74591	1.76316	1.60759	1.06775	1.18955	1.90708	1.89602	2.41272	1.56247	0.865139
106	91	17.269	Galactose	Carbohydrates	C6H12O6	319	A	0.539013	0.426023	0.132212	0.575373	0.628023	1.63815	0.0927895	0.255497	0.282604	1.29136	1.43257	1.27266	1.95177	1.04343	1.60948	2.12875	1.83298	1.23963	0.787472	1.54197	0.590946	0.319094	0.869966	0.536406	0.26905	1.83305	2.01452	0.556411	0.646268	1.85579	1.31078	2.05245	1.79167	1.37659	0.963277	0.752741	1.10807	1.6506	1.45361	2.08822	0.810409	0.417422
107	92	17.366	Glucose 1	Carbohydrates	C6H12O6	319	A	1.57847	1.57647	1.53566	1.54484	1.61012	0.921254	1.22223	1.18243	1.37395	0.962616	0.853136	0.842018	0.860601	0.637592	0.779844	0.690882	0.438879	0.300852	0.333196	0.265508	0.00279028	0.00166579	0.00289837	0.00302686	0.00221254	0.960082	1.08897	1.21437	1.27171	1.17221	0.259021	0.322518	0.142893	0.243055	0.21824	0.00140664	0.00161699	0.00581179	0.00574408	0.00232333	0.00308716	0.000846643
108	93	17.421	Citric acid	TCA	C6H8O7	273	A	0.233612	0.241543	0.12379	0.254445	0.00961153	0.885729	0.0896524	0.242632	0.0654105	0.899767	2.08691	1.9938	2.37883	1.39433	1.81845	1.88192	2.56434	1.85941	1.77399	2.20421	3.73962	2.4057	5.37498	5.00399	2.04449	1.00095	0.51282	0.209276	0.116759	0.30094	0.385834	0.487915	0.626194	0.383775	0.402098	0.19964	0.29881	0.463555	0.407969	0.405389	0.275941	0.144481
109	94	17.567	Glutamine2	Amino acid	C5H10N2O3	156	A	0.421718	0.411714	0.421684	0.43936	0.469623	5.67506	5.86128	6.18998	2.69646	2.38114	0.563273	0.482116	0.384077	0.260457	0.428319	0.408958	0.289382	0.218116	0.218013	0.259118	0.333796	0.154687	0.628094	0.530919	0.203378	5.6328	3.24374	2.01573	1.63313	2.76405	3.13277	4.21279	0.653001	2.57659	3.24364	1.78581	0.949182	0.925311	0.348025	0.274107	0.157995	0.147447
110	95	17.567	Isocitric acid	TCA	C6H8O7	273	A	11.4193	5.65744	10.8848	12.3597	11.0103	7.67739	7.13685	7.426	5.92471	4.53861	1.54912	1.98091	0.782926	1.4571	2.66023	0.507293	0.428142	0.197769	0.31124	0.452595	0.917632	0.818533	1.41785	1.25933	0.572501	7.66774	5.71643	6.59095	5.27327	6.97254	2.69284	3.19691	1.02252	1.92278	2.66988	0.97426	0.542471	0.627628	0.359717	0.399828	0.12441	0.107679
111	96	17.63	Glucose 2	Carbohydrates	C6H12O6	319	A	0.886488	1.35395	1.42729	1.5319	1.38292	0.8282	1.43059	1.28671	1.58148	0.903809	0.721827	0.692841	0.728663	0.370348	0.580664	0.430551	0.191791	0.11316	0.126702	0.0948238	0.000972682	0.000478611	0.00102032	0.00102308	0.000713392	0.930352	1.13368	1.37543	1.47459	1.29213	0.0970011	0.128492	0.0513223	0.094117	0.0809191	0.000825127	0.000793706	0.00215199	0.00214898	0.000777744	0.00115442	0.000202103
112	97	18.095	Lysine	Amino acid	C6H14N2O2	174	A	0.223532	0.263849	0.358388	0.263196	0.201386	1.00231	1.56241	1.4503	1.41272	0.711649	0.903424	0.80155	1.0624	0.710668	0.828221	0.874579	0.583175	0.438255	0.46154	0.492566	0.311768	0.179986	0.699809	0.56556	0.278446	1.09783	0.910755	1.21062	1.28872	1.28358	1.71243	2.07927	2.38598	1.94919	2.09538	2.20768	2.44651	2.90537	1.82439	1.75427	0.626781	0.57089
113	98	18.151	Erythrotetrofuranose	unspecified	C4H8O4	218	D	0.736518	0.641394	0.653147	0.650318	0.647793	1.29321	2.05196	2.03977	2.06309	1.11925	1.10839	1.10441	1.37856	0.845655	1.24612	1.0716	0.732455	0.476608	0.651362	0.659603	0.36749	0.19602	0.659793	0.654191	0.297429	1.98097	2.03322	2.24483	2.42413	2.03698	1.28427	1.84239	1.35896	1.59556	1.68835	0.730177	0.817307	0.946532	0.639135	0.684988	0.265189	0.204716
114	99	18.151	Erythrofuranose	unspecified	C4H8O4	217	D	0.716195	0.648519	0.701365	0.699495	0.708168	1.12269	2.01726	2.02416	1.9604	1.10679	1.07483	1.12835	1.36039	0.886352	1.16131	1.07178	0.785327	0.554115	0.682878	0.702292	0.435794	0.25718	0.715318	0.681554	0.353885	1.92686	1.95739	2.16356	2.34987	1.90794	1.27587	1.79765	1.35761	1.57267	1.71118	0.680032	0.835045	0.935755	0.616792	0.801761	0.293807	0.238594
115	100	18.408	Gluconic acid 1	Organic acid	C6H12O7	217	A	2.30388	2.16172	1.52773	1.3389	1.9001	1.26455	1.79464	1.75949	2.6159	0.643321	1.06235	1.22474	1.48573	0.61719	0.861079	1.02875	1.03497	0.690916	0.66043	0.625589	0.493689	0.308595	0.836192	0.293352	0.252911	1.85717	1.77131	1.75949	2.23669	1.49382	0.682828	0.894365	0.762777	0.584837	0.434895	0.471603	0.782064	0.819705	0.56275	0.83557	0.624656	0.396009
116	101	18.464	Gluconic acid 2	Organic acid	C6H12O7	333	A	3.87153	3.6239	3.2589	2.88983	2.88542	1.55397	2.26057	2.26294	2.51261	1.24528	1.02106	0.999685	1.30498	0.560733	0.983063	0.820576	0.420974	0.384677	0.447772	0.385695	0.23067	0.110247	0.376875	0.355504	0.091929	2.06688	1.98987	2.95122	3.56182	2.84369	0.690315	1.09263	0.607206	0.80158	0.787672	0.484747	0.61399	0.529185	0.3399	0.465751	0.179787	0.0610598
117	102	18.533	Borinic acid	unspecified	BH3O	129	D	0	0	0.0745662	0.0307127	0.267323	0.0221559	0.963898	0.817593	0.845784	0.426731	1.40045	1.23982	1.60883	0.830237	0.537129	2.00229	2.01837	1.24482	1.53159	1.70215	1.51444	0.654708	2.23951	1.9168	0.853424	1.05856	1.12781	1.22026	1.47001	1.2708	0.601801	1.35911	0.754983	0.693787	0.934141	0.782525	0.887078	1.00917	0.743103	0.807775	0.546221	0.30495
118	103	18.596	Glucopyranose	unspecified	C6H12O6	204	D	37.5517	36.0924	30.1	30.7291	35.056	15.4066	13.9759	13.3452	14.4064	11.9017	5.31155	6.50419	0.849367	5.33924	9.60441	0.0173505	0.00550346	0.00570775	0.120093	0.108385	0.00167168	0.000656733	0.00236798	0.00235863	0.00194934	16.1368	13.4876	16.6721	13.7415	16.4369	5.18352	4.63571	2.53432	2.64947	4.14229	0.0119938	0.00963879	0.030865	0.0380293	0.00811385	0.00340738	0.00090058
119	104	19.381	Myo-Inositol	Carbohydrates	C6H12O6	305	A	1.58896	1.76308	1.80461	1.40362	1.29475	0.790638	1.29018	1.22008	1.4178	0.767737	0.63214	0.630249	0.840757	0.500778	0.60558	0.770779	0.599742	0.477055	0.523268	0.510152	0.496749	0.436721	1.14661	0.959743	0.376283	2.16276	2.64208	2.62999	3.41939	3.37055	1.06746	1.41262	1.28323	1.32003	1.33849	1.05529	1.28985	1.31966	0.776823	0.891903	0.345858	0.290805
120	105	19.43	Talopyranose	unspecified	C6H12O6	204	D	4.01237	4.07291	3.9646	4.13225	4.0129	0.69761	2.24775	1.91043	3.05754	1.02346	0.417172	0.480186	0.643697	0.322829	0.541387	0.192576	0.070816	0.04877	0.0593228	0.0485553	0.0022965	0.00202649	0.00439064	0.00426094	0.00224955	0.963165	1.53486	2.37188	2.72653	2.08042	0.0613258	0.114797	0.0455712	0.0849522	0.0804654	0.00415305	0.00538236	0.00579046	0.00178219	0.004503	0.000432132	0.00153175
121	106	19.506	Tyrosine	Amino acid	C9H11NO3	218	A	0.339961	0.352068	0.409917	0.392823	0.236551	0.497268	0.872996	0.742433	0.919389	0.439155	1.00985	0.904728	1.3899	0.825881	0.792403	1.14506	0.84806	0.550684	0.581668	0.691041	0.527915	0.32689	1.2134	0.93935	0.414434	0.612677	0.771333	1.01361	0.834423	0.96248	0.901523	1.23442	2.50585	1.12549	1.17556	1.57566	2.38851	3.37908	2.36015	2.27653	0.468211	0.370729
122	107	19.603	Mannonic acid	unspecified	C6H12O7	217	D	2.55645	3.06083	2.35001	2.4237	3.30152	2.10256	2.50125	1.70527	1.32778	0.182824	2.95133	2.13029	1.22939	0.142357	0.240806	2.27216	0.886336	0.474967	0.476719	0.441567	0.0937976	0.0703029	0.0690949	0.0177569	0.0513984	1.7255	1.28677	1.13517	1.78113	0.857466	0.598843	0.575046	0.214955	0.0953679	0.0952471	0.0336415	0.0300176	0.0134083	0.0552035	0.0372654	0.0284473	0.0562302
123	108	20.249	2-Fluoro-4-phenylpyrimidine	unspecified	C10H7FN2	174	D	38.163	36.3491	38.6839	33.985	41.3549	1.15208	1.55796	1.49101	2.25395	2.61589	0.351482	0.347995	0.307547	0.0697385	0.331258	0.259427	0.404483	0.305455	0.104608	0.153425	0.506301	0.18132	1.05445	0.817335	0.170162	2.62984	2.68493	5.59721	5.199	4.01066	0.0446326	0.136687	0.201544	0.108095	0.172254	0.0474222	0.147846	0.60254	0.0920548	0.147148	0	0
124	109	20.305	Histidine	Amino acid	C6H9N3O2	154	A	0.0503451	0.173154	0.0138819	0.2508	0.273844	0.439316	1.49258	1.23207	0.741387	0.273011	1.12092	0.980988	1.34247	0.196013	0.862992	1.68138	0.820513	0.382863	0.356765	0.465507	0.208691	0.0285967	0.767485	0.607102	0.0691319	1.62428	1.52599	2.32522	3.88731	3.68185	2.56954	3.96218	4.85737	2.40657	2.77499	3.44586	8.03976	13.7101	4.21834	5.53194	2.90391	2.44572
125	110	20.354	Sorbopyranose	unspecified	C6H12O6	204	D	3.85507	5.16926	5.76407	6.98273	6.35078	0.292145	1.50078	1.36278	3.36943	1.13168	0.16186	0.206465	0.375686	0.231915	0.389735	0.0653161	0.0227444	0.0240406	0.0270409	0.0224648	0.0015304	0.000540365	0.00540365	0.0017269	0.000495019	0.450366	0.931056	2.63631	2.8052	2.28302	0.0172614	0.0446802	0.0241766	0.0766789	0.0532013	0.00214256	0.00149639	0.00381656	0.0023315	0.001281	0.000884233	0.000634834
126	111	20.715	Mannobiose	unspecified	C12H22O11	205	D	0.933924	0.837351	0.939442	0.819924	0.591345	0.676155	0.92492	1.00218	1.07334	0.497531	0.579582	0.565205	0.68269	0.509004	0.641011	0.574644	0.507406	0.444961	0.45077	0.410979	0.241359	0.149579	0.445687	0.37903	0.223787	2.98678	3.39617	3.77534	4.56012	4.18937	1.74223	2.30932	1.92608	2.0273	2.01365	0.980685	1.34258	1.61342	1.00305	1.29567	0.562881	0.408655
127	112	20.924	5-fluoro-2-phenylpyrimidine	unspecified	C10H7FN2	174	D	0.649438	0.595965	0.566263	0.540503	0.518309	0.536895	1.11139	0.902738	1.1379	0.741576	0.918878	0.845377	1.15543	0.715567	0.841496	1.17576	1.07047	0.915725	0.847866	0.822284	0.924234	0.834556	0.980696	0.97951	0.767801	0.486564	0.492861	0.715415	0.620062	0.585427	0.547202	0.451818	0.692294	0.933064	0.951375	0.900223	1.0021	0.939289	0.968422	1.06759	1.0361	0.882995
128	113	21.062	Palmitic acid	Fatty acid	C16H32O2	313	A	1.3619	1.02438	1.93759	1.20379	2.87127	0.892236	1.12407	1.19298	1.09711	1.31663	0.677873	0.695681	1.0089	0.819006	1.00308	0.936673	0.738287	0.71066	0.606141	0.693185	0.613131	0.535075	0.675543	0.681867	0.476325	1.04835	0.886244	1.19581	1.09395	2.60082	0.709162	0.772406	0.854955	0.843971	1.1279	0.544728	0.718149	0.95781	0.59083	0.987268	0.608138	0.515769
129	114	21.146	2,3,4-Trifluoroaniline	unspecified	C6H4F3N	243	D	1.73931	1.82198	1.62386	1.60486	1.60533	0.884146	1.5602	1.48181	1.3008	0.962061	0.845188	0.740668	0.962536	0.777725	0.860391	1.0376	0.530677	0.56821	0.629021	0.536854	0.450387	0.31261	0.590064	0.559658	0.198113	1.33358	1.1559	1.74026	1.6975	1.43288	0.426157	0.644224	0.705511	0.841862	0.765848	0.67178	0.743043	0.705036	0.705986	0.640424	0.527827	0.337315
130	115	22.515	Uric acid	Organic acid	C5H4N4O3	441	A	1.25129	1.34649	1.53092	1.2249	0.761653	2.36956	4.48532	3.46987	3.18779	1.51351	1.40199	1.30406	1.56166	0.779334	1.10276	1.07502	0.69528	0.518468	0.550566	0.529349	0.201022	0.103095	0.428974	0.364233	0.164843	0.803272	0.636252	0.719762	0.625916	0.487458	0.928673	0.636524	1.42375	0.630812	0.457808	0.760021	1.24911	1.07366	0.908815	0.7962	0.19395	0.153147
131	116	22.612	Ethene	unspecified	C2H4	232	D	14.7535	12.547	20.1517	10.2061	9.02961	10.4952	8.08512	10.2916	6.02924	6.0211	2.6584	1.81976	1.82791	2.2228	3.05736	0	0	0	0	0	0	0	0	0	0	7.30348	9.44486	6.72539	6.12287	7.64952	0.663583	0.708364	0	0.411177	0	0	0	0	0	0	0	0
132	117	22.744	1,3-Isoindolinedione	unspecified	C8H5NO2	246	D	29.5715	17.5743	30.3436	11.9972	7.95239	12.6532	6.31908	10.7816	3.72509	5.57255	3.02532	2.21545	1.3905	1.53528	2.09932	0.104061	0	0	0	0.105569	0	0	0	0	0	7.19681	10.569	3.89249	3.76732	6.43219	1.04061	1.15825	0.487127	0.0995368	0.271464	0	0	0	0	0	0	0
133	118	22.904	Methyl cinnamate	unspecified	C10H10O2	128	D	0.380679	0.359772	0.679316	0.421997	0.299034	1.44533	1.8483	1.68858	1.58018	0.907803	1.44939	1.45484	1.9458	1.24469	1.52797	1.36101	0.870052	0.573693	0.778697	0.784246	0.424771	0.288135	0.873916	0.706762	0.401189	1.37518	1.46099	1.52797	1.36874	1.47416	0.981323	1.19832	2.07362	1.20297	1.18444	1.23973	1.84632	1.9681	1.32643	1.29274	0.426653	0.352737
134	119	23.071	Antipyrine	unspecified	C11H12N2O	357	D	0.291645	0.316291	0.761547	0.261979	0.561668	1.25287	2.54283	2.24273	1.75684	1.28007	1.9437	1.68977	1.96794	0.929863	1.07133	0.720044	0.565152	0.416665	0.561053	0.652974	0.486246	0.298511	0.7658	1.12498	0.398425	1.60743	1.0949	1.08342	3.40849	3.13888	1.01256	1.41975	1.94017	1.30661	1.60159	1.14942	1.4157	2.06293	1.13861	1.32409	0.293541	0.234515
135	120	23.182	Dulcitol	unspecified	C6H14O6	387	D	1.1576	1.33105	3.4394	1.14575	1.5115	1.31112	1.33644	1.38815	1.76414	1.19962	1.21093	1.03963	1.01162	1.03855	0.932974	1.00677	0.614082	0.526279	0.450327	0.689496	1.11073	0.582301	1.40916	0.837091	0.599	2.09327	1.80723	1.62355	2.70088	3.14475	0.359292	0.663101	0.458946	0.648018	0.590381	1.5713	1.84117	1.60793	1.1005	1.14952	0.788072	0.594152
136	121	23.21	Mannose-6-phosphate	unspecified	C6H13O9P	387	D	0.940952	0.880592	1.55835	0.988751	0.598092	0.857918	2.35284	2.99107	3.86645	0.910313	1.058	1.2832	2.16195	0.590432	0.963932	1.57612	1.21212	0.875689	1.23939	0.991815	0.367986	0.244507	0.700429	0.81778	0.181388	1.48267	1.90182	2.14909	2.53117	1.714	0.556115	0.936969	1.06014	0.972205	1.00989	0.335507	0.480128	0.528845	0.739035	0.614944	0.26718	0.208964
137	122	23.265	Linoleic acid	Fatty acid	C18H32O2	339	A	1.04821	0.548064	2.59742	1.16085	3.67421	0.762414	1.15833	1.52735	1.13984	1.74002	0.759051	0.764095	1.48616	0.910357	1.3483	1.33401	0.476614	0.860763	0.602702	0.801921	0.775863	0.653137	1.01543	1.26761	0.632963	1.38277	0.807805	1.36848	1.70892	7.57706	0.881777	1.06082	0.996097	1.10033	1.43741	0.689282	0.84227	1.59123	0.870009	1.47607	0.816211	0.610267
138	123	23.321	Mannopyranose	unspecified	C6H12O6	204	D	9.9738	6.90941	6.88811	6.82649	6.84833	1.28705	1.76073	1.82921	2.67609	1.19601	0.846399	0.747895	1.05219	0.685074	0.698733	0.667684	0.43716	0.237685	0.316091	0.36772	0.157293	0.121671	0.535844	0.328667	0.181182	0.453948	0.468029	0.540838	0.806384	0.611662	0.175044	0.230223	0.186838	0.213074	0.219874	0.0910423	0.115232	0.124619	0.0984437	0.0996471	0.051027	0.034359
139	124	23.328	Oleic acid	Fatty acid	C18H34O2	337	A	7.46469	5.18211	7.85934	5.65365	10.514	1.01247	1.60908	1.93567	2.63481	1.33464	0.684113	0.795922	1.34922	0.79106	0.871934	0.776918	0.422046	0.208151	0.152467	0.197544	0.120648	0.0760125	0.248808	0.371666	0.14407	0.687648	0.797689	1.15124	1.08053	3.54165	0.175889	0.48922	0.353105	0.19887	0.557278	0	0.136557	0.351779	0.141861	0.348243	0.0981092	0.0667319
140	125	23.342	Stearic acid	Fatty acid	C18H36O2	341	A	1.45181	0.906937	1.72523	1.14135	2.28074	1.11299	1.24852	1.35253	1.19887	1.71656	0.613423	0.811988	1.21739	0.66858	1.05862	0.947517	0.848234	0.75171	0.596482	0.840355	0.740284	0.507837	0.748558	0.730829	0.544477	0.925848	0.577177	1.25797	0.958548	2.14285	0.647305	0.812382	0.754073	0.877388	1.35765	0.538962	0.733587	0.696159	0.618939	0.847446	0.60318	0.376643
141	126	23.418	Glucose-6-phosphate	Carbohydrates	C6H13O9P	387	A	1.11825	1.22404	2.01553	1.27095	0.846856	0.890728	2.52813	2.83836	3.6084	0.928712	1.10543	1.21245	2.20298	0.877054	0.879902	1.52288	1.14256	0.763386	0.886834	0.876389	0.314224	0.171783	0.690931	0.627403	0.237971	1.44112	1.41766	1.84271	2.18523	1.90262	0.581822	0.836885	0.925293	0.806783	0.828054	0.308431	0.434823	0.503764	0.635095	0.5615	0.241579	0.187832
142	127	23.585	Altro-2-Heptulose	unspecified	C25H62O7Si6	387	D	1.26613	1.44128	2.10847	1.42744	1.14062	0.983126	2.51556	2.83198	3.46003	0.824203	1.32579	1.22318	2.24592	0.81609	0.969286	1.50332	1.14157	0.826112	0.927765	0.781728	0.267258	0.178967	0.683893	0.716346	0.261531	1.71379	1.62932	1.9128	2.43777	2.05072	0.616601	0.872405	0.79175	0.704892	0.950673	0.420931	0.471519	0.507312	0.715868	0.591307	0.198534	0.14031
143	128	24.113	Glucose-1-phosphate	unspecified	C6H13O9P	387	D	10.4296	8.47173	11.8064	6.94361	6.27709	5.04463	6.61949	8.01147	7.2596	2.76667	2.69047	2.8002	2.12962	2.27796	3.3641	1.05262	0.681762	0.411496	0.594383	0.584222	0	0	0.35663	0.297699	0	8.74301	5.70099	8.15066	5.83714	6.52399	5.36977	5.56789	6.96698	4.41672	6.67233	1.5586	1.13695	2.90079	1.73438	1.11866	0.251978	0
144	129	24.189	Galactopyranoside	unspecified	C6H12O6	204	D	1.05926	1.04415	1.102	0.809291	0.776751	0.475221	0.740565	0.638822	0.874742	0.440937	0.402427	0.380346	0.405491	0.297885	0.310299	0.226992	0.171842	0.118805	0.150554	0.151504	0.098256	0.126571	0.241361	0.179396	0.08188	5.83672	6.32557	6.45801	8.44986	7.58816	1.61879	2.13559	2.16433	1.67368	1.79581	0.91246	1.10728	1.71171	1.18911	1.52799	0.59466	0.41706
145	130	24.829	Sucrose	Carbohydrates	C12H22O11	361	A	0.479741	0.410268	0.628318	0.494186	0.625566	0.614561	0.774755	0.829019	0.958488	0.733483	0.588957	0.615554	0.871895	0.640546	0.937012	1.15437	0.754119	0.688161	0.736158	0.786754	0.71193	0.585518	0.945113	0.839489	0.605084	0.638789	0.733025	0.913166	0.948094	1.12075	0.809224	0.839795	1.17532	1.37044	1.27842	0.897346	0.928146	1.25931	1.1799	1.27108	1.02712	0.793556
146	131	25.301	Cellobiose	Carbohydrates	C12H22O11	204	A	15.1799	14.7011	11.1087	10.6419	12.9691	3.05924	4.17201	3.12125	5.19262	2.55023	2.27635	1.73547	0.75103	1.57699	3.23322	0.55466	1.0542	0.366902	1.25143	0.37207	0.829406	0.711412	1.45038	0.530544	0.580498	4.39938	3.51141	3.97047	4.75165	4.45106	3.89123	2.76727	4.1367	2.1506	2.70784	1.97318	1.99213	4.23574	1.75183	2.21433	0.65629	0.576192
147	132	25.489	Arabinofuranose	unspecified	C5H10O5	204	D	2.62718	2.26535	2.02493	1.72387	2.66491	1.25269	1.41606	1.38256	1.57175	0.94832	0.66818	0.750395	0.688038	0.693069	0.871003	0.939847	0.339319	0.298278	0.369505	0.384994	0.410016	0.225595	0.408428	0.572858	0.305427	1.48993	1.36151	1.7379	1.86765	2.07603	1.48358	1.5233	1.92047	1.72572	1.88843	1.22753	1.20688	1.77405	1.26103	1.32365	0.719945	0.506265
148	133	25.551	Maltose	Carbohydrates	C12H22O11	204	A	0.674	0.705272	0.695387	0.729581	0.718763	0.572536	1.91979	1.49528	2.16369	0.510551	1.27607	1.15465	1.50424	0.565387	0.819605	1.64568	1.16099	0.822714	0.587893	0.689232	0.718452	0.470637	1.10099	0.783857	0.399948	0.576267	0.670954	0.845531	1.25369	0.992628	0.317758	0.377318	0.477849	0.302961	0.289594	0.302526	0.700361	0.748046	0.482636	0.857841	0.707386	0.349776
149	134	25.69	Trehalose	Carbohydrates	C12H22O11	361	A	0.210181	0.246863	0.219238	0.216375	0.168351	0.811706	0.945901	0.888156	0.835652	0.541115	1.02071	0.944059	1.0403	0.927448	0.982324	0.974276	0.873689	0.766431	0.8168	0.8284	0.23805	0.0962461	0.353476	0.357325	0.181295	1.22277	1.27393	0.793509	1.31147	1.28758	1.30167	0.88798	1.3414	1.33429	1.29335	1.1196	1.17882	1.20168	1.08928	1.0894	0.677453	0.56731
150	135	26.135	Gentiobiose	Carbohydrates	C12H22O11	204	A	3.19688	2.07178	2.57183	2.17074	2.27605	0.917118	2.02974	1.17896	2.15235	1.06534	1.39002	1.11219	1.58662	0.83852	0.74613	0.691834	0.526976	0.642136	0.759703	1.0441	0.761455	0.400432	0.882526	0.595284	0.625715	0.956088	2.11819	1.22998	2.21234	2.4617	0.717011	1.25428	0.470929	0.535952	0.631627	0.609514	0.707816	0.698621	0.129171	0.621775	0.412035	0.204047
151	136	26.427	Lactose	unspecified	C12H22O11	204	D	1.74312	1.85919	1.80599	1.62376	1.79519	0.580663	1.8618	1.47037	2.33808	0.516369	1.09353	0.925205	1.25663	0.456267	0.637511	1.24613	0.768415	0.577063	0.480377	0.479045	0.377971	0.29642	0.685682	0.453752	0.239326	0.839513	1.05019	1.33261	1.83784	1.36811	0.385169	0.502071	0.517257	0.365053	0.317572	0.354304	0.779608	0.745587	0.507987	0.937925	0.721822	0.433291
152	137	26.517	Adenosine	Carbohydrates	C10H13N5O4	230	A	1.10198	1.10419	4.73633	0.912015	3.25176	0.640224	0.635358	0.651502	0.673396	1.49474	0.766942	0.976369	0.456892	0.513285	0.394086	0.28506	0.201908	0.186649	0.242821	0.322876	0.324867	0.182226	0.315136	0.436104	0.249455	0.83992	0.62209	0.407797	2.85281	3.4477	0.308502	0.352289	0.280637	0.306069	0.284175	0.320665	0.32752	0.338135	0.297002	0.270685	0.200802	0.204783
153	138	26.878	Galactinol	Carbohydrates	C12H22O11	204	A	0.745985	1.10365	1.28175	1.44088	1.40876	1.28175	0.637956	1.10657	1.26423	0.862774	0.922628	0.89781	1.10949	1.10365	0.99854	1.18978	0.975182	1.40876	1.36788	0.80292	0.870073	0.772263	1.35036	0.878832	0.973723	1.0438	1.18394	1.22336	1.06131	1.3854	0.867153	1.10803	1.20584	1.26423	1.22336	1.05109	1.07299	1.20438	1.30803	1.08759	0.760584	0.816058
154	139	28.643	Raffinose	Carbohydrates	C18H32O16	361	A	0.603412	0.376434	1.03921	1.27247	0.871595	0.75636	0.833882	0.981942	0.945625	0.863215	0.597825	0.63484	1.13768	0.893246	0.842263	1.68383	1.29762	1.03642	0.860421	1.46034	0.933752	1.37584	1.14257	1.62097	1.57697	0.440686	0.884865	0.731218	0.981942	1.12441	0.63484	0.850644	0.702584	1.07832	1.10276	0.941435	0.567096	0.494463	1.262	1.22847	1.5232	1.05388
155	140	29.158	Aminoformic acid	unspecified	CH3NO2	169	D	1.00012	1.28556	1.70388	1.58999	1.19516	1.41179	2.24795	2.12243	1.88824	1.34393	1.0573	1.37098	1.61775	1.4583	1.35508	1.37027	1.04188	0.85016	0.968324	1.0089	0.629493	0.572547	1.22007	1.11876	0.636849	1.12445	1.41701	1.75394	1.77411	1.81801	0.614308	0.937715	1.0592	1.04069	1.08791	0.610037	0.851347	0.665085	0.743386	0.91375	0.364693	0.366829
[truncated: 8 more columns]
