# Supplementary material for: Integrated metabolomics and lipidomics analyses suggest the temperature-dependent lipid desaturation promotes aflatoxin biosynthesis in Aspergillus flavus
Source: Front Microbiol. 2023 Mar 31;14:1137643. doi: 10.3389/fmicb.2023.1137643 (PMC10102665; doi:10.3389/fmicb.2023.1137643)
Supplement: Supplementary file 3 [file Table_3.XLSX]

## Sheet: Supplementary Table S3
Supplementary Table S3 The total peak information for lipidome in mycelia samples detected by LC-MS (ESI+).
RT, retention time of metabolite peak. Molecular formula, metabolites classes, and mass from HPLC/ESI-qIT-OT-MS. Identification level (A; B; C; D)- (A): Class and all fatty acid chains are completely identified. (B): Both class specific ion and fatty-acid-derived product ions are detected. (C): Either class specific ion or fatty-acid-derived product ions are detected. (D): Unable to identify the …
1	Level	Aspect	Information	Fill in
2	General aspect	Type of metabolome analysis	targeted metabolite analysis	FALSE
3			non-targeted metabolite class scale profiling	TRUE
4			non-targeted metabolome scale profiling	TRUE
5			non-targeted finger printing of mass features	FALSE
6		Type of quantification	absolute or quantification	NO
7		Type of reference samples	chemcially defined	NO
8			biologically defined	YES
9		Type of replication	analytical (same analytical sample preparation)	NO
10			technological (same biological preparation)	NO
11			biological (same experimental condition)	5
12			full experiment	50
13		Type of technology	reference publication	Journal of Agricultural and Food Chemistry
14		Sample preparation	method of sample preparation	NO
15			method of chromatography/separation	HPLC
16			method of ionization	ESI
17			method of detection	MS
18	metabolite/mass feature	Metabolite	metabolite name	see below
19			metabolite sum formula	see below
20			metabolite structure and public source of metabolite identifier	see below
21		Identification	identification process	see below
22			by authentic mass isotopomer added to one or all biological sample(s)	FALSE
23			by authentic reference compound within a co-processed reference mixture	FALSE
24			reference library	YES
25			type of mass spectrum	Orbitrap Fusion
26		Quantification	type of quantification	Relative peak area
27		Validity testing	Recovery testing (chemical analog)	NO
28			Recovery testing (internally added mass isotopomer)	NO
29			Recovery testing (mixture of most divergent samples from the experiment)	NO
30			Test for linear range	NO
31			Limit of quantification (LOQ)	NO
32			Limit of detection (LOD)	NO
33
34	Experiment title: The total peak information for lipidome in mycelia samples detected by LC-MS (ESI+).
35	Organism/Plant species: Aspergillus flavus
36	Organ/tissue: mycelia
37	Analytical tool: HPLC/ESI-qIT-OT-MS (Orbitrap Fusion)
38
39	Peak No.	RT (min)	Corresponding metabolite name in literature	Metabolite class	Molecular formula	Adduct	Identification level (A-D)	28-2D-1	28-2D-2	28-2D-3	28-2D-4	28-2D-5	28-3D-1	28-3D-2	28-3D-3	28-3D-4	28-3D-5	28-4D-1	28-4D-2	28-4D-3	28-4D-4	28-4D-5	28-5D-1	28-5D-2	28-5D-3	28-5D-4	28-5D-5	28-6D-1	28-6D-2	28-6D-3	28-6D-4	28-6D-5	37-2D-1	37-2D-2	37-2D-3	37-2D-4	37-2D-5	37-3D-1	37-3D-2	37-3D-3	37-3D-4	37-3D-5	37-4D-1	37-4D-2	37-4D-3	37-4D-4	37-4D-5	37-5D-1	37-5D-2
40	1	5.858	Cer(d17:1/18:1)	Cer	C35 H67 O3 N1	Cer(d17:1/18:1)+H	B	0.953216	1.33394	1.28807	1.20879	0.9504	0.819211	0.595537	0.616639	0.598388	0.759185	0.408752	0.380428	0.438443	0.488229	0.388106	0.272842	0.278891	0.149403	0.274348	0.317846	0.288422	0.513913	0.528455	0.202434	0.26227	1.44489	1.30481	0.531434	1.03784	0.719634	0.337554	0.0953271	0.506264	0.929408	0.400084	0.543285	0.760831	0.587655	0.297091	0.137421	0.615559	0.393253
41	2	5.157	Cer(d17:1/18:2)	Cer	C35 H65 O3 N1	Cer(d17:1/18:2)+H	B	0.241854	0.233729	0.3258	0.243019	0.149557	0.423208	1.96115	0.573806	0.605937	0.557209	0.470926	0.551636	0.574705	0.623975	0.540621	0.52968	0.436024	0.00120668	0.469393	0.365206	0.539236	0.671015	1.07326	0.403788	0.534867	1.7281	0.0683952	1.04846	1.77702	1.49991	1.20301	1.22148	2.11714	2.05065	1.59669	1.81886	1.73422	1.87726	0.0342766	1.00618	0.0273715	0.809681
42	3	6.048	Cer(d18:0/16:0)	Cer	C34 H69 O3 N1	Cer(d18:0/16:0)+H	B	1.38617	1.60632	1.38618	1.55012	1.10488	0.9409	1.16812	1.02545	0.993171	1.16637	0.700956	0.96635	0.939784	0.938816	0.73525	0.533669	0.535583	0.617604	0.162248	0.67217	0.577789	1.14275	1.31059	0.713951	0.707044	1.24624	1.32828	0.195857	0.227287	0.458589	0.0784939	0.148396	0.382337	0	0.132801	0.199591	0.570428	0.555132	0.0496048	0.106523	0.564628	0.151074
43	4	6.288	Cer(d18:0/17:0)	Cer	C35 H71 O3 N1	Cer(d18:0/17:0)+H	A	0.723524	1.18914	1.26444	1.05491	0.927015	0.679581	0.610579	0.704592	0.650247	0.824384	0.379378	0.421008	0.456836	0.492538	0.382	0.289367	0.313044	0.239155	0.303743	0.28338	0.267984	0.470806	0.47607	0.337904	0.315122	1.657	1.75353	1.17248	1.8818	1.55597	0.388826	0.397874	0.572351	0.87337	0.502462	0.346526	0.376698	0.402313	0.313546	0.315433	0.408055	0.227092
44	5	5.9	Cer(d18:0/18:0)	Cer	C36 H73 O3 N1	Cer(d18:0/18:0)+H	B	0.40447	0.315946	0.462345	0.258633	0.217261	0.362754	0.833877	0.737204	0.540874	0.467314	0.477025	0.3638	0.53642	0.691511	0.589256	0.400672	0.332346	0.426874	0.433624	0.439113	0.365286	0.596478	0.619199	0.375018	0.447749	0.771577	0.85532	0.323726	0.437189	0.653411	0.398336	0.368213	0.997976	0.647769	0.614384	1.0363	0.887903	0.993947	0.634351	0.436633	1.39467	0.750297
45	6	6.53	Cer(d18:0/18:0)	Cer	C36 H73 O3 N1	Cer(d18:0/18:0)+H	A	0.85682	1.2386	1.23525	0.962973	0.854813	0.685691	0.74402	0.830141	0.721316	0.947284	0.546723	0.541963	0.593649	0.597857	0.491114	0.440409	0.342028	0.307845	0.378344	0.399999	0.357121	0.535848	0.620541	0.324216	0.334745	0.965324	1.0993	0.595876	1.02397	0.871958	0.419594	0.414213	0.65496	0.915933	0.565361	0.390242	0.430906	0.465244	0.354426	0.303506	0.419412	0.260873
46	7	6.327	Cer(d18:0/18:0+O)	Cer	C36 H73 O4 N1	Cer(d18:0/18:0+O)+H	A	0.744699	1.06682	1.0083	0.963582	0.747574	0.498726	0.488645	0.508987	0.491737	0.644335	0.313276	0.306229	0.321163	0.322203	0.282178	0.243728	0.210285	0.177674	0.223764	0.21656	0.177881	0.24541	0.345083	0.160611	0.167099	1.78576	2.08817	1.14861	2.03874	1.85977	0.650475	0.540219	0.950494	1.35376	0.780982	0.439674	0.47774	0.507789	0.278921	0.254438	0.408734	0.229855
47	8	6.763	Cer(d18:0/19:0)	Cer	C37 H75 O3 N1	Cer(d18:0/19:0)+H	B	0.655298	1.06092	1.29835	0.918524	0.801872	0.499143	0.536603	0.578317	0.482674	0.695088	0.349784	0.402281	0.379331	0.376591	0.380236	0.319599	0.265365	0.220974	0.262482	0.262441	0.246068	0.423981	0.463004	0.198273	0.243164	1.57615	1.80361	1.03524	1.68718	1.55851	0.592563	0.574465	0.743603	1.43822	0.732735	0.442262	0.388616	0.530528	0.399296	0.450754	0.564702	0.350414
48	9	7.78	Cer(d18:0/24:0)	Cer	C42 H85 O3 N1	Cer(d18:0/24:0)+H	B	0.937249	1.42014	1.56229	1.25718	1.14536	1.36451	1.36132	1.52106	1.3054	1.65159	1.03481	1.17041	1.0568	1.19048	0.980175	0.941082	0.708504	0.588972	0.814692	0.798676	0.583666	0.973842	0.980144	0.632486	0.553108	0.732771	0.786137	0.564801	0.713454	0.591501	0.396366	0.385532	0.55163	0.686478	0.461768	0.308776	0.316368	0.31488	0.328203	0.271547	0.318548	0.312917
49	10	5.803	Cer(d18:1/18:0)	Cer	C36 H71 O3 N1	Cer(d18:1/18:0)+H	B	0.420491	0.229214	0.251175	0.1886	0.0832839	0.815033	1.31811	0.742386	0.872771	0.591721	0.844627	0.617005	0.823577	1.17479	0.918354	0.617341	0.50311	0.633794	0.626467	0.726528	1.07654	1.05457	1.39571	0.931906	0.886587	0.629177	0.755735	0.132508	0.234806	0.269824	0.257146	0.365226	0.781617	0.665784	0.555263	1.73523	1.22488	1.71612	1.08301	0.933811	2.55104	1.64621
50	11	6.341	Cer(d18:1/18:0)	Cer	C36 H71 O3 N1	Cer(d18:1/18:0)+H	B	0.675098	1.05265	1.00413	0.863854	0.611382	0.703443	0.687756	0.824094	0.769791	1.01862	0.570019	0.500751	0.560628	0.583876	0.530638	0.473193	0.421401	0.355607	0.396405	0.475868	0.430665	0.644166	0.892339	0.361231	0.402033	0.741615	0.923841	0.48266	0.846726	0.716534	0.298817	0.342878	0.542817	0.920584	0.467865	0.408187	0.431904	0.521465	0.33449	0.290598	0.428884	0.285623
51	12	6.112	Cer(d18:1/18:0+O)	Cer	C36 H71 O4 N1	Cer(d18:1/18:0+O)+H	A	0.769675	1.18829	1.23491	1.06154	0.842531	0.755409	0.712358	0.735493	0.817211	0.997697	0.593026	0.504612	0.538068	0.574032	0.549657	0.412906	0.375059	0.302282	0.413143	0.456229	0.311763	0.459147	0.61663	0.278679	0.325802	0.832471	0.899675	0.499175	0.880349	0.722881	0.414192	0.318391	0.507576	0.872159	0.428446	0.416012	0.461611	0.475604	0.30166	0.243298	0.482405	0.287301
52	13	6.109	Cer(d18:1/18:1)	Cer	C36 H69 O3 N1	Cer(d18:1/18:1)+H	A	0.864611	1.23931	1.25708	1.13582	0.901164	0.783447	0.759835	0.848475	0.883928	0.957317	0.663789	0.493363	0.568683	0.647614	0.63457	0.473607	0.450857	0.338057	0.420929	0.504633	0.376903	0.570095	0.789093	0.314528	0.363537	0.758666	0.849096	0.483865	0.681779	0.654669	0.329487	0.307808	0.435065	0.688595	0.431113	0.38735	0.463348	0.417201	0.258962	0.219022	0.437745	0.27651
53	14	4.936	Cer(d18:2/18:0+O)	Cer	C36 H69 O4 N1	Cer(d18:2/18:0+O)+H	B	1.09841	1.29759	1.52321	1.29054	0.974803	0.835222	0.705494	0.866441	0.806591	1.09995	0.861385	0.452977	0.719493	0.820785	0.653704	0.551069	0.424002	0.444974	0.460142	0.487884	0.489911	0.672354	0.852717	0.362521	0.426796	0.834149	0.949189	0.365038	0.779638	0.738105	0.529921	0.468289	0.426818	0.555212	0.500352	0.563702	0.710544	0.62678	0.405682	0.357235	0.000518736	0.270274
54	15	5.843	Cer(d18:2/18:1)	Cer	C36 H67 O3 N1	Cer(d18:2/18:1)+H	A	1.43075	1.01262	0.820156	0.00905709	0.719255	1.16625	1.17913	1.15151	1.01355	1.28197	1.07835	0.941085	1.03008	1.06175	0.825393	0.0291536	0.581841	0.563579	0.597734	0.710205	0.532535	0.894454	1.15801	0.415575	0.534585	0.909733	1.01669	0.533967	0.809386	0.695278	0.501661	0.394506	0.57905	0.727075	0.502166	0.446853	0.532395	0.0602344	0.375905	0.256651	0.439313	0.203261
55	16	3.616	Cer(d18:2/2:0)	Cer	C20 H37 O3 N1	Cer(d18:2/2:0)+H	B	0.42559	0.355537	0.405783	0.40867	0.397606	0.779012	0.889745	0.808744	0.664505	0.399658	0.782942	0.829058	0.596893	0.768196	0.732751	2.23097	1.46925	1.16419	0.842387	0.561668	4.44086	2.0059	2.10705	5.20003	3.36883	0.805527	0.811089	0.675601	0.590921	0.63741	1.06681	1.20349	0.849881	1.15065	0.876705	1.17474	1.17121	1.12362	0.838569	0.68566	2.82995	2.82528
56	17	6.998	Cer(d20:0/18:0)	Cer	C38 H77 O3 N1	Cer(d20:0/18:0)+H	B	0.800873	1.38414	1.46294	1.11476	0.944274	0.612742	0.609172	0.652265	0.584433	0.838802	0.508275	0.459195	0.477167	0.490201	0.495166	0.421802	0.369604	0.253295	0.384398	0.391108	0.335663	0.602978	0.550357	0.279611	0.299984	0.907862	1.10131	0.596867	0.929664	0.848422	0.355201	0.355232	0.521753	0.97051	0.500751	0.344769	0.360193	0.402125	0.27392	0.244768	0.38522	0.247039
57	18	3.122	Cer(d20:0/2:0)	Cer	C22 H45 O3 N1	Cer(d20:0/2:0)+H	B	0.611735	0.493106	1.02767	1.2074	0.760152	0.756666	0.304964	0.755852	0.601189	0.757656	0.391596	0.431497	0.679527	0.514234	0.747775	0.726759	0.494711	0.502933	0.459516	0.387137	0.499634	1.22553	1.03271	0.489919	0.527999	0.888128	1.02915	0.663635	0.704364	0.892194	0.563047	0.618418	1.07768	1.50593	1.03476	0.791598	0.803275	0.799592	0.655317	0.75465	0.958347	0.538711
58	19	8.127	Cer(d20:0/24:0)	Cer	C44 H89 O3 N1	Cer(d20:0/24:0)+H	A	1.15088	1.81828	2.07177	1.59804	1.40364	1.28345	0.982753	1.10568	1.01292	1.31655	0.877362	0.797859	0.832838	0.714988	0.714042	0.582373	0.525865	0.361366	0.52173	0.652462	0.542643	0.800679	0.677222	0.417459	0.477706	0.329242	0.425248	0.305857	0.389449	0.296778	0.115112	0.116294	0.159036	0.187758	0.162492	0.0803288	0.101056	0.0827977	0.0830077	0.0727481	0.105338	0.0870293
59	20	8.419	Cer(d20:0/26:0)	Cer	C46 H93 O3 N1	Cer(d20:0/26:0)+H	B	1.2919	4.15553	5.94594	0.975518	3.30752	2.97846	1.85454	2.3822	1.61341	2.50508	0.00762192	1.32109	0.846035	1.38335	0.784009	1.22281	0.619241	0.721471	0.0229108	1.76719	2.137	2.53244	0.625595	0.00534157	1.293	0.00200412	0.262495	0.310511	0.854999	0.00446345	0	0	0	0	0	0	0	0	0.212379	0.00490226	0	0.101986
60	21	3.785	Cer(d24:0)	Cer	C24 H49 O3 N1	Cer(d24:0)+H	D	0.214798	0.184361	0.274455	0.145473	0.0736147	1.06843	1.09437	1.00879	0.744845	2.34764	2.39568	0.770216	0.515506	0.669501	0.508938	0.190301	0.287139	0.0500174	0.0668705	0.16734	0.0501591	0.193053	0.205533	0.0157345	0.0318904	3.06058	2.66739	0.176264	1.40318	1.22093	0.180048	0.257851	0.433911	0.366895	0.160355	0.119489	0.20276	0.147213	0.0476676	0.106457	0.0827601	0.0147272
61	22	7.426	Cer(d24:0/18:0+O)	Cer	C42 H85 O4 N1	Cer(d24:0/18:0+O)+H	B	0.757402	0.70394	0.789172	0.61621	0.518281	0.629862	0.614373	0.688154	0.597389	0.822757	0.541167	0.516327	0.46468	0.529935	0.492834	0.401699	0.332055	0.281531	0.327903	0.374292	0.326928	0.480421	0.590582	0.280502	0.300417	2.18766	2.24267	1.0471	2.03468	1.61347	0.536506	0.506091	0.784293	1.04988	0.667533	0.447724	0.483804	0.550456	0.407849	0.297036	0.518331	0.352994
62	23	7.437	Cer(d43:0+2O)	Cer	C43 H87 O5 N1	Cer(d43:0+2O)+H	D	0.562773	0.581561	0.60197	0.471285	0.423343	0.589938	0.757799	0.694774	0.670389	0.982336	0.638566	0.506133	0.428482	0.498822	0.485948	0.427676	0.343989	0.278031	0.314085	0.386938	0.358644	0.435084	0.591963	0.321126	0.332508	1.15646	1.34409	0.57563	1.2626	1.02848	0.447753	0.40655	0.726015	0.664805	0.563975	0.483577	0.579423	0.48408	0.353168	0.248831	0.495734	0.420303
63	24	7.796	Cer(d44:0+O)	Cer	C44 H89 O4 N1	Cer(d44:0+O)+H	D	0.880802	1.40622	1.23057	1.21436	1.04782	0.780227	0.614136	0.740783	0.724318	0.87298	0.392748	0.385323	0.375726	0.428543	0.41716	0.498987	0.383429	0.345867	0.381982	0.357093	0.449326	0.689936	0.897712	0.450945	0.397486	2.14182	2.08257	1.37253	2.64349	1.94096	0.678412	0.596286	0.8118	1.05384	0.683514	0.481241	0.47093	0.521597	0.384892	0.306561	0.578867	0.389279
64	25	5.697	CerG1(d18:1/18:1)	CerG1	C42 H79 O8 N1	CerG1(d18:1/18:1)+H	B	0.674662	0.198418	0.363637	0.1349	0.106794	0.50182	0.538425	0.499415	0.477954	0.782798	1.98147	0.479664	0.605905	0.775317	0.615296	0.616569	0.692272	0.426186	1.36214	0.473169	0.543683	0.89665	1.08491	0.704882	0.488362	1.42671	1.74018	0.872671	1.39581	0.91471	0.742873	0.394033	1.07781	1.30485	0.739222	1.19525	1.11435	1.15301	0.641648	0.887856	1.38631	1.00272
65	26	5.831	CerG1(d18:2/20:0+O)	CerG1	C44 H83 O9 N1	CerG1(d18:2/20:0+O)+H	B	0.244105	0.168273	0.174774	0.220259	0.174134	0.531562	0.515422	0.532298	0.598206	0.287794	0.4182	0.236289	0.4387	0.461642	0.475214	0.296505	0.285309	0.234193	0.184535	0.279465	0.453384	0.538593	0.531567	0.445321	0.411736	1.55365	1.78232	1.04925	1.49629	1.14573	0.918097	0.860657	1.24951	1.36618	0.990289	0.881236	0.928522	1.17359	0.794791	0.651185	0.906301	0.690838
66	27	5.827	CerG1(d18:2/20:1)	CerG1	C44 H81 O8 N1	CerG1(d18:2/20:1)+H	B	0.418285	0.522664	0.481623	0.391212	0.411413	0.511187	0.581324	0.604389	0.54563	0.653549	0.424175	0.447349	0.490541	0.506098	0.506485	0.439101	0.459466	0.384304	0.407562	0.399437	0.357237	0.521108	0.515019	0.389239	0.381978	1.51419	1.83901	0.983352	1.58187	1.13699	0.983461	0.882329	1.29726	1.43218	0.956944	0.800809	0.884382	1.17657	0.715013	0.790058	0.887087	0.621106
67	28	5.787	DG(14:0/18:2)	DG	C35 H64 O5	DG(14:0/18:2)+NH4	B	1.02697	0.884446	0.756211	0.873491	0.692101	0.994396	0.840766	0.67573	0.733654	0.820667	0.964701	1.04257	1.11118	1.05997	0.991361	1.07457	0.936256	0.966926	0.718663	0.745601	1.03155	1.17941	1.16321	0.994349	0.997139	1.40932	1.48143	0.916528	0.806908	1.05683	1.12409	1.10313	0.968598	0.886179	1.10412	1.02655	0.934666	0.974108	0.822111	0.721641	1.28984	1.02611
68	29	6.047	DG(15:0/18:2)	DG	C36 H66 O5	DG(15:0/18:2)+NH4	A	0.464661	0.47026	0.351145	0.40088	0.287554	0.398095	0.397057	0.4313	0.361876	0.53346	0.57129	0.49611	0.32276	0.427962	0.423047	0.288685	0.346511	0.278311	0.270813	0.458242	0.395291	0.553892	0.580885	0.382204	0.29606	1.85432	2.06072	1.00573	1.08939	1.34336	0.973145	1.02078	0.907426	1.36612	1.08003	0.87851	0.811948	0.985475	0.671674	0.50175	0.871761	0.431542
69	30	1.062	DG(16:0)	DG	C19 H36 O5	DG(16:0)+Na	C	1.01377	0.736406	0.700088	0.705955	0.377373	0.814198	1.85354	0.607296	0.686204	0.935449	0.712828	0.77968	0.733098	0.832172	1.18966	0.754453	1.13748	0.785959	0.767561	0.806362	0.801118	1.20896	0.711183	0.83159	1.48112	4.31975	3.00508	0.689669	0.645722	0.686773	0.726974	0.796784	0.877842	1.35168	1.70034	0.911137	0.816085	0.874098	0.821594	1.73562	0.781733	0.751173
70	31	5.771	DG(16:0/12:0)	DG	C31 H60 O5	DG(16:0/12:0)+Na	B	13.2744	2.30113	1.39443	0.30335	1.83237	14.1525	3.19695	0	1.81993	2.2467	7.45619	8.37285	3.36937	9.45554	10.2953	3.26337	5.9217	3.78253	1.31029	3.36425	40.5901	17.4883	2.6	34.835	27.8875	2.57326	0.808968	0	1.35848	1.18542	0	2.46549	0	0	0.741279	1.90335	2.2826	3.00308	1.75624	0.71805	9.52691	18.9178
71	32	6.662	DG(16:0/18:1)	DG	C37 H70 O5	DG(16:0/18:1)+H	A	0.242722	0.267744	0.153362	0.205625	0.158596	0.236806	0.356529	0.334325	0.261345	0.385662	0.58361	0.416493	0.607676	0.659489	0.521606	0.786414	0.596934	0.53978	0.634705	0.587642	0.867781	1.21016	1.40196	0.677459	0.858582	1.02425	1.2119	0.556389	0.878484	0.739364	1.00052	0.719641	1.03731	1.70457	0.983067	1.0944	1.14926	1.01303	0.733228	0.650878	1.10451	0.550906
72	33	4.777	DG(16:0/18:2)	DG	C37 H68 O5	DG(16:0/18:2)+NH4	B	0.630256	0.721707	0.89346	0.659641	0.368213	0.728706	0.819236	0.724062	0.708477	0.770536	0.613652	0.718184	0.673752	0.668379	0.671699	0.599162	0.468981	0.412841	0.480294	0.508575	0.607264	0.6136	0.880551	0.501367	0.43848	1.52136	1.53775	0.826555	1.28385	1.22159	0.738973	0.666254	0.954698	0.725321	0.887773	0.736174	0.948168	0.604476	0.7241	0.519472	0.758012	0.531099
73	34	5.508	DG(16:0/18:2)	DG	C37 H68 O5	DG(16:0/18:2)+NH4	B	1.16316	1.18566	1.90931	1.12167	0.921978	1.60996	1.584	1.03791	1.45153	0.694876	1.77009	1.50212	2.11271	0.776991	1.12591	1.54705	0.494403	1.54008	1.32431	0.852077	1.55654	1.03654	0.836135	0.63786	1.29295	0.914253	0.828562	1.04881	0.916841	0.780603	1.2218	0.843995	0.476035	0.707348	1.09592	0.85432	0.929197	1.11011	1.12244	0.836614	1.06734	1.19472
74	35	6.28	DG(16:0/18:2)	DG	C37 H68 O5	DG(16:0/18:2)+NH4	A	0.545245	0.534162	0.441174	0.494002	0.389657	0.522435	0.561949	0.544283	0.557803	0.688355	0.865512	0.682788	0.718153	0.873885	0.708851	0.729821	0.677561	0.576466	0.69819	0.684018	0.685267	0.786847	0.92929	0.601512	0.701459	1.28771	1.22217	0.79009	1.18538	0.991654	0.814926	0.831657	1.02448	1.33375	0.934188	0.846365	0.86905	0.903364	0.739039	0.661204	0.802053	0.548746
75	36	6.271	DG(16:0/20:5)	DG	C39 H66 O5	DG(16:0/20:5)+H	B	0.712815	0.671839	0.644965	0.695672	0.565401	0.718718	0.683192	0.739563	0.687049	0.780964	0.908018	0.873584	0.902729	0.923394	0.830425	0.885925	0.861686	0.755766	0.890122	0.816323	0.83643	0.899822	0.994439	0.742537	0.800853	1.25441	1.26526	0.980531	1.17625	1.1009	1.03701	1.03408	1.17124	1.19789	1.05134	1.08242	1.02724	1.03786	0.904573	0.847882	0.997755	0.77498
76	37	5.819	DG(16:1/18:2)	DG	C37 H66 O5	DG(16:1/18:2)+NH4	A	0.467899	0.443779	0.290904	0.310389	0.275849	0.447234	0.44461	0.407249	0.444543	0.661192	0.678011	0.525541	0.637819	0.698458	0.572498	0.679715	0.559436	0.463427	0.511004	0.62384	0.718746	0.918589	0.990867	0.620783	0.726355	1.45821	1.4234	0.531616	0.981006	0.883952	0.869565	0.907277	1.0908	0.941621	0.984396	1.07893	1.0828	1.00766	0.690638	0.642959	1.04759	0.698289
77	38	6.517	DG(17:0/18:2)	DG	C38 H70 O5	DG(17:0/18:2)+NH4	A	0.360322	0.383	0.309925	0.322333	0.309793	0.306411	0.365047	0.302649	0.293197	0.443852	0.316168	0.313232	0.320996	0.366813	0.33966	0.32608	0.265316	0.225178	0.26675	0.313222	0.28594	0.395971	0.448736	0.264588	0.291001	2.79414	3.00993	1.52374	2.20339	1.97064	1.47945	1.24032	0.869165	3.04106	1.77728	0.727319	0.768459	0.861618	0.715816	0.573017	0.808906	0.640002
78	39	5.815	DG(17:1/17:1)	DG	C37 H68 O5	DG(17:1/17:1)+H	B	1.38886	1.28621	1.24087	1.20528	1.25631	1.38775	1.28901	1.43286	1.44266	1.05933	1.35644	1.31042	1.29129	1.23608	1.28827	0.816725	1.32194	1.29349	1.48357	1.17911	1.48057	0.736266	1.19642	1.43309	1.3637	1.24698	0.560181	1.0201	0.839084	0.509295	1.0573	0.910985	0.838989	0.363075	1.01419	1.26049	1.20049	1.17881	1.16922	1.16763	1.32073	1.35722
79	40	6.06	DG(17:1/18:2)	DG	C38 H68 O5	DG(17:1/18:2)+NH4	A	0.537836	0.496494	0.438382	0.451749	0.352016	0.429446	0.463782	0.435412	0.399128	0.604529	0.553108	0.458565	0.429473	0.550325	0.441433	0.422941	0.399557	0.317885	0.366548	0.430335	0.420255	0.59906	0.682615	0.409663	0.470113	2.70163	2.68406	0.940452	1.45733	1.70421	1.10271	1.04505	1.34526	1.45012	0.994613	1.05435	1.01741	1.08596	0.630157	0.559778	1.18155	0.65184
80	41	7.108	DG(18:0/18:1)	DG	C39 H74 O5	DG(18:0/18:1)+Na	B	0.516596	0.502411	0.42092	0.484463	0.401258	0.517185	0.506962	0.574272	0.5351	0.612549	0.7495	0.701472	0.923617	0.772582	0.738286	1.19858	0.900342	0.860383	0.975552	0.878739	1.3382	1.63208	1.77879	1.21513	1.31825	1.15197	1.2476	0.788917	0.975928	0.8909	1.02321	1.07977	0.849045	1.72593	1.17356	0.745133	0.844963	0.928113	0.751742	0.581434	0.860419	0.535064
81	42	5.71	DG(18:1/12:0)	DG	C33 H62 O5	DG(18:1/12:0)+NH4	B	1.7626	1.09151	2.77232	1.44095	2.48917	1.51132	1.02928	0.922629	0.880651	0.505867	1.11017	0.50131	1.49514	1.79116	1.24168	2.27889	1.14803	1.40352	2.7035	0.736076	1.79766	1.51399	1.09352	1.83439	1.84772	1.10709	0.319503	0.862043	0.471143	0.886076	0.777236	1.06645	0.965861	0.496033	0.378025	1.39944	1.11231	1.06538	1.18601	0.766644	1.24932	1.71799
82	43	6.326	DG(18:1/18:1)	DG	C39 H72 O5	DG(18:1/18:1)+H	B	1.04856	1.06301	1.01232	0.979005	0.95778	1.08613	1.07741	1.11873	1.05029	0.944205	1.18173	1.03297	1.09245	1.03395	1.06725	1.08795	1.08607	1.13214	1.09038	1.14592	1.07181	1.04725	0.940284	1.06724	0.979261	1.11189	1.0105	1.19359	1.13144	1.07231	1.12893	1.0744	0.997405	1.02663	1.11289	1.04428	1.07759	1.06252	1.2619	1.07526	1.17265	1.17511
83	44	6.69	DG(18:1/18:1)	DG	C39 H72 O5	DG(18:1/18:1)+Na	B	0.657962	0.683217	0.567195	0.601168	0.577009	0.612347	0.514195	0.594189	0.640949	0.717096	0.737269	0.684586	0.87664	0.809641	0.775036	0.861753	1.013	0.797998	0.821216	0.899603	1.33002	1.07092	1.15911	0.908709	0.931257	0.881365	1.45433	0.943912	1.32484	0.677871	1.11665	1.19826	0.990553	1.3609	1.24419	0.864755	1.05648	1.2035	0.781062	0.882751	1.16405	0.810485
84	45	5.94	DG(18:1/18:2)	DG	C39 H70 O5	DG(18:1/18:2)+H	B	1.23521	1.17717	1.16421	1.05662	1.06298	1.27681	1.14871	1.09539	1.06315	1.02245	1.21178	1.18931	1.17059	1.12429	1.05581	1.17539	1.2101	1.14632	1.05711	1.04502	1.29167	1.15799	1.08371	1.28341	1.21448	1.09444	1.0479	0.990623	0.827877	0.888677	1.05678	1.00449	0.99008	1.07061	0.932247	1.13435	1.07787	1.02738	1.04996	1.08191	1.18433	1.19331
85	46	6.3	DG(18:1/18:2)	DG	C39 H70 O5	DG(18:1/18:2)+H	A	0.539068	0.575354	0.458847	0.593898	0.429133	0.743083	0.709908	0.621141	0.631818	0.83722	0.818454	0.726794	0.810616	0.862552	0.775712	0.878691	0.742323	0.721511	0.726401	0.757031	0.813767	0.95377	1.07042	0.774718	0.695658	1.13913	1.16279	0.712325	0.943497	0.873913	0.68791	0.7912	1.06216	1.00639	0.963033	0.984951	0.952218	0.847621	0.68855	0.654969	0.818757	0.645237
86	47	5.5	DG(18:1/18:2)	DG	C39 H70 O5	DG(18:1/18:2)+NH4	B	1.85896	0.956505	1.18168	1.02053	0.935928	1.27038	1.13997	1.1786	1.07323	1.111	1.72009	1.30267	1.39291	1.30256	1.24502	1.25965	1.23191	1.20043	1.17712	1.16627	2.17902	1.30521	1.58704	1.37894	1.88924	0.499548	0.367646	0.327343	1.36827	0.972271	1.2016	0.407524	0.435274	0.351249	1.17552	1.26979	0.476849	1.13866	0.409157	1.20105	1.32452	1.35656
87	48	5.492	DG(18:1/18:3)	DG	C39 H68 O5	DG(18:1/18:3)+H	B	1.52918	1.15022	1.33123	1.12862	1.16644	1.57042	1.28408	1.21271	1.26844	1.1009	1.43631	1.49197	0.881751	1.43275	1.38782	1.24849	1.41288	1.52431	1.38119	1.2749	1.49514	1.58812	1.39855	1.68247	1.00845	0.766156	0.952656	1.07492	0.567868	1.0622	1.28298	1.2037	1.17607	0.805271	0.624123	1.35688	1.38535	1.24919	1.3377	1.25379	1.49422	1.17615
88	49	6.66	DG(18:1/18:3)	DG	C39 H68 O5	DG(18:1/18:3)+H	B	0.441263	0.461871	0.339596	0.355593	0.325902	0.469576	0.601137	0.482546	0.507814	0.671387	0.699329	0.623838	0.787659	0.779356	0.683948	1.01139	0.883211	0.729081	0.804642	0.86559	1.00191	1.26197	1.26741	0.999243	1.01838	1.1457	1.14944	0.89946	1.09446	1.01749	1.10232	1.10675	1.46533	1.45154	1.1281	1.14914	1.11422	1.27063	0.962899	0.851509	1.30191	0.853256
89	50	6.686	DG(18:1/20:4)	DG	C41 H70 O5	DG(18:1/20:4)+H	B	0.677185	0.927568	0.589043	0.57755	0.547762	0.594102	0.486984	0.575164	0.568367	0.672469	0.682038	0.652211	0.878614	0.736266	0.853492	1.07189	0.913174	0.85975	0.934931	0.8494	1.01784	1.17244	1.17172	1.14993	1.10621	1.2359	1.22659	0.900355	1.06011	0.980176	1.06694	1.06182	1.0267	1.45646	1.04889	1.03977	0.955777	0.982826	0.908773	0.840622	1.11936	0.815946
90	51	6.301	DG(18:1/20:5)	DG	C41 H68 O5	DG(18:1/20:5)+H	B	0.736852	0.699822	0.633285	0.729142	0.565953	0.758441	0.87689	0.840651	0.777919	0.823212	0.910498	0.893491	0.887803	0.905192	0.821389	0.9645	0.880649	0.891083	1.00456	0.793861	1.07681	1.14429	1.26551	0.998514	1.07902	1.25363	1.23979	0.921004	1.09082	1.0701	0.908301	0.92526	1.16875	0.978881	1.00663	1.11283	1.00045	1.06166	0.925908	0.845944	1.066	0.847025
91	52	8.234	DG(18:1/24:0)	DG	C45 H86 O5	DG(18:1/24:0)+NH4	B	0.404289	0.294008	0.296037	0.29634	0.11429	0.414079	0.210399	0.309387	0.321643	0.415361	0.425311	0.401309	0.454805	0.515583	0.360697	0.579331	0.57259	0.551029	0.561309	0.496505	1.12191	1.15764	1.21971	0.889833	0.969466	2.52127	2.39736	1.24691	1.78205	1.84275	1.8788	2.08408	1.63192	3.40775	2.22759	1.61333	1.61629	1.7727	1.45175	1.15282	1.69986	1.01889
92	53	7.578	DG(18:1p/18:1)	DG	C39 H72 O4	DG(18:1p/18:1)+Na	B	1.91161	1.55066	1.61024	1.82307	1.48087	1.70512	1.20233	1.29012	1.54483	1.12974	1.20825	1.43748	1.27493	1.28376	1.3147	1.25037	1.27923	1.39189	1.78488	1.25008	1.38723	1.48002	1.33445	2.29083	1.42235	1.69437	1.65564	1.88379	1.14279	1.24944	2.3001	1.60272	1.2072	1.50287	1.70169	1.38743	1.88391	1.54028	1.52643	1.44645	1.52438	1.84007
93	54	5.671	DG(18:2/17:2)	DG	C38 H66 O5	DG(18:2/17:2)+NH4	B	0.700221	0.573663	1.61593	1.6145	0.400463	1.63999	1.64953	1.39758	1.54343	0.503494	1.60273	1.51368	1.50506	1.626	1.61774	1.56605	1.22377	1.37996	1.40278	1.3389	1.66453	1.59712	1.53695	1.60513	1.63553	2.15348	1.88501	0.703101	1.20346	1.25363	2.35947	0.562401	0.692871	0.599915	0.702008	0.647528	0.654789	0.632726	1.6805	1.70795	2.5455	1.57182
94	55	4.283	DG(18:2/18:2)	DG	C39 H68 O5	DG(18:2/18:2)+H	B	0.999608	1.19767	1.11347	1.11504	0.81288	1.20693	1.01995	1.00676	1.06104	1.12222	1.08441	1.00243	1.12344	1.27106	1.01203	0.95861	0.811019	0.887962	0.778119	0.956374	0.926446	0.936472	0.944422	0.78843	0.720116	0.823067	1.11981	0.881225	1.33155	0.966209	0.963822	0.818047	0.88953	1.00066	0.86671	1.05092	1.10462	0.938051	0.792396	0.891543	0.983888	0.634107
95	56	5.899	DG(18:2/18:2)	DG	C39 H68 O5	DG(18:2/18:2)+NH4	A	0.794597	0.866209	0.755104	0.731108	0.647503	0.744349	0.743413	0.763676	0.718282	0.891651	0.817052	0.696036	0.713671	0.830782	0.712954	0.743362	0.668112	0.591788	0.623584	0.688489	0.71634	0.75305	0.897954	0.649804	0.652535	1.30124	1.32287	0.807156	0.986657	0.879434	0.779927	0.778165	0.930594	0.963658	0.774658	0.749269	0.804949	0.829637	0.684681	0.611695	0.720695	0.617687
96	57	4.415	DG(18:3/18:2)	DG	C39 H66 O5	DG(18:3/18:2)+H	B	1.1166	1.03112	1.04334	0.483573	0.772355	0.782549	0.988267	0.954762	0.848599	0.948388	0.896991	0.749645	0.631737	0.722781	0.663981	0.642624	0.695971	1.45975	0.598314	0.843143	0.612057	0.684606	0.771389	1.51325	0.864653	1.40851	1.20864	0.605784	0.820916	0.911435	0.652085	0.603161	0.783137	0.739719	0.62876	0.679933	0.71911	0.694235	0.541786	0.522827	0.6802	0.565295
97	58	4.796	DG(18:3/18:2)	DG	C39 H66 O5	DG(18:3/18:2)+H	B	0.671827	1.21706	0.75118	0.486724	0.684704	0.767976	1.05096	0.896503	0.808798	0.586788	1.00761	1.06242	0.985434	0.774012	0.733985	0.916429	0.952854	0.560076	0.672567	0.932021	0.912277	1.36656	0.784157	0.84139	0.709866	1.4647	1.14661	0.375631	1.07592	0.659573	0.991186	0.861892	1.01791	0.732975	0.692309	0.937686	0.96499	0.703977	0.605636	0.643365	2.03174	0.774725
98	59	5.542	DG(18:3/18:2)	DG	C39 H66 O5	DG(18:3/18:2)+H	B	1.68206	1.41098	1.27516	1.1557	1.24821	0.967623	1.07068	0.883659	0.795964	0.852831	0.994623	1.01407	1.00291	0.933199	0.807064	0.900105	0.855671	0.811454	0.840577	0.766032	0.965711	1.00589	0.98467	0.850458	0.998247	0.855201	0.918216	0.806274	0.675499	0.745195	0.863444	0.716846	0.758825	0.602512	0.641287	0.859995	0.876957	0.786486	0.943038	0.776503	0.915986	0.785546
99	60	4.452	DG(18:3/18:3)	DG	C39 H64 O5	DG(18:3/18:3)+H	A	1.26949	0.341682	0.768697	0.228513	0.345609	0.324142	0.901727	1.01499	0.96683	1.04651	1.86977	0.36872	0.307215	0.743095	0.435836	0.618883	0.370027	0.649749	0.301627	0.333814	0.37653	0.354907	0.347779	0.508597	0.282198	0.484807	0.501835	0.690294	0.383657	0.336958	0.745491	0.328333	0.753074	0.743272	0.297704	0.637409	0.350266	0.596996	0.316094	0.288345	0.624427	0.703424
100	61	5.178	DG(18:3/18:3)	DG	C39 H64 O5	DG(18:3/18:3)+H	A	2.87315	1.53977	1.05025	1.52791	1.51545	1.50244	1.4073	1.1183	0.877205	0.773996	1.45929	0.906081	1.09766	1.25449	1.23812	1.35929	1.36355	1.08022	1.50383	1.01635	2.39281	1.47725	0.972816	1.50393	1.9579	1.24911	0.965294	0.650173	0.405072	0.616097	0.878422	0.780252	0.702013	0.526253	0.846278	0.763162	0.866121	0.83121	1.37134	0.782564	1.55127	1.28883
101	62	7.177	DG(20:0/18:2)	DG	C41 H76 O5	DG(20:0/18:2)+NH4	B	0.544744	0.611614	0.707224	0.479922	0.53596	0.558531	0.624165	0.515632	0.513511	0.555667	0.634028	0.564636	0.593223	0.524713	0.626448	1.10205	0.666418	0.498299	0.686408	0.814081	1.08273	1.10817	0.558958	0.803272	0.289378	0.969428	1.76108	0.998467	1.27657	1.23442	1.10397	1.17044	0.604216	1.35889	0.454962	1.04889	0.971451	0.529846	0.337715	0.828071	1.02059	0.656424
102	63	3.188	DG(20:1)	DG	C23 H42 O5	DG(20:1)+H	C	0.646275	0.0748994	0.938188	0.633001	0.530092	1.32341	1.51389	1.09459	0.732102	1.12869	1.35315	1.07836	1.26045	1.278	1.58539	1.16168	0.726991	0.468573	0.275459	0.620578	0.916622	1.46522	1.17319	0.678518	1.10694	1.15092	0.842032	0.288289	0.898872	0.952229	0.303591	0.0811731	0.398798	0.807782	0.180753	0.134786	0.508188	0.496972	0.436012	0.176635	0.781608	0.674796
103	64	6.727	DG(20:1/18:2)	DG	C41 H74 O5	DG(20:1/18:2)+NH4	A	0.552206	0.563084	0.543673	0.488572	0.501987	0.484059	0.469382	0.483145	0.393117	0.578711	0.533689	0.481606	0.478041	0.573012	0.515503	0.677559	0.600408	0.502112	0.474455	0.464888	0.608845	0.666463	0.927734	0.475341	0.640942	1.75848	1.69861	0.811177	1.33352	1.11008	0.756687	0.879893	0.87302	1.3541	0.883315	0.903301	0.89826	1.0026	0.72302	0.557596	0.783686	0.406737
104	65	6.334	DG(20:2/18:2)	DG	C41 H72 O5	DG(20:2/18:2)+NH4	A	0.835525	0.831081	0.524516	0.788472	0.542113	0.546225	0.515143	0.543598	0.531482	0.642293	0.627004	0.541934	0.537875	0.55323	0.574817	0.569964	0.451105	0.475991	0.52057	0.532056	0.529843	0.595361	0.73987	0.563052	0.556129	1.59066	1.44996	0.657705	1.11633	1.0014	0.646271	0.742836	0.911592	1.13969	0.842504	0.860806	0.688454	0.842645	0.593087	0.586608	0.609061	0.422664
105	66	5.92	DG(20:5/18:2)	DG	C41 H66 O5	DG(20:5/18:2)+H	B	1.06456	1.11673	0.988548	0.90597	0.896201	1.09879	1.01326	0.983979	0.959664	1.04865	1.01835	1.03521	0.984921	1.08808	0.995315	0.970737	0.917944	0.83915	0.849117	0.877604	0.98249	0.985113	1.04352	0.888437	0.872467	1.16594	1.14474	0.850173	0.787064	0.79392	0.911073	0.863773	0.950016	0.702851	0.806106	0.931128	0.922469	0.882981	0.815704	0.800391	0.93423	0.822384
106	67	3.506	DG(23:1)	DG	C26 H48 O5	DG(23:1)+NH4	C	0.994197	1.42139	0.969753	0.966337	1.34284	1.04109	1.18194	1.17969	0.942582	1.14232	0.928098	1.01944	1.01438	1.02839	0.991537	0.963349	1.03918	0.905019	0.954588	0.921774	0.943892	0.934158	0.90628	1.03261	0.980294	1.07676	1.06846	1.01054	0.944609	0.945444	0.957249	1.00642	0.989512	0.996604	0.962742	0.932239	1.07477	0.945753	0.982042	0.969472	1.02358	1.14864
107	68	4.713	DG(23:1e)	DG	C26 H50 O4	DG(23:1e)+H	C	1.05117	0.978676	1.05027	1.03003	0.971857	0.90262	1.04565	1.0102	1.04148	0.948435	1.03785	1.05042	0.911757	1.06393	1.07422	1.47543	1.06358	1.03207	1.038	1.01525	0.953525	1.01049	1.36692	0.898847	2.4582	1.49772	1.38994	0.869714	0.979981	0.868662	1.05386	1.0715	1.26319	0.830996	1.00547	1.45795	1.46	1.34228	1.31883	0.936191	0.632406	0.915094
108	69	7.936	DG(24:0/18:2)	DG	C45 H84 O5	DG(24:0/18:2)+NH4	B	0.411262	0.512938	0.424655	0.456868	0.350459	0.422494	0.414385	0.408177	0.424807	0.655721	0.456803	0.374843	0.397695	0.415329	0.381658	0.420655	0.387413	0.319504	0.366898	0.445785	0.521002	0.68183	0.809856	0.520654	0.58619	2.35591	3.00319	1.39813	1.87051	1.7362	1.32081	1.62094	1.19268	2.49497	1.51904	0.706984	0.736215	0.768125	0.833757	0.525802	0.816681	0.421794
109	70	6.367	DG(24:1p)	DG	C27 H50 O4	DG(24:1p)+H	C	1.23475	1.09848	1.00578	1.09037	1.00367	0.863314	0.841555	0.782533	0.769235	0.779863	0.879529	0.878836	0.800783	0.724487	0.984035	0.983685	0.87167	0.985794	0.878241	0.794089	1.07056	1.0581	0.962468	1.01531	0.980281	1.11863	1.26326	1.33809	0.890944	1.09443	0.915033	0.898369	0.898744	0.903998	0.891239	0.983109	0.865274	1.13743	1.1406	0.790179	0.982292	0.938037
110	71	7.259	DG(24:1p)	DG	C27 H50 O4	DG(24:1p)+H	C	0.777449	0.947658	0.839146	0.874439	0.782981	0.612873	0.582297	0.621955	1.12661	0.637497	0.644603	0.760608	0.882097	0.718327	0.634463	1.01621	0.745311	0.976395	0.940992	0.786109	0.92121	1.07432	0.958294	0.875289	1.08612	1.2761	1.41118	1.31242	1.27942	1.36909	1.21978	1.24383	1.12953	1.1897	1.08548	1.1691	1.274	1.45136	1.60051	1.37186	1.16982	1.61713
111	72	8.107	DG(25:0/18:2)	DG	C46 H86 O5	DG(25:0/18:2)+NH4	B	0.428921	0.365634	0.359045	0.348757	0.321812	0.418375	0.333908	0.302108	0.305755	0.539536	0.39354	0.375509	0.268862	0.266207	0.370656	0.310469	0.26173	0.175533	0.334604	0.315943	0.449838	0.381812	0.539697	0.438672	0.42983	2.49516	2.82537	1.41032	2.11808	1.55796	1.24536	1.2803	1.28911	2.57164	1.27615	0.728154	0.836441	0.80253	0.992823	0.570533	0.876103	0.517248
112	73	2.997	DG(25:6)	DG	C28 H42 O5	DG(25:6)+H	C	0.653747	0.500814	0.524072	0.35463	0.295593	0.894455	1.27701	1.09045	0.978262	1.32823	1.32815	0.731074	0.789802	0.9118	0.897362	0.423787	0.440994	0.317087	0.429724	0.670101	0.368205	0.503001	0.608024	0.267328	0.389335	1.45434	1.16098	0.352785	0.692232	0.709981	0.245559	0.291523	0.528204	0.463116	0.354831	0.307119	0.331056	0.300437	0.246747	0.244501	0.299842	0.119864
113	74	8.281	DG(26:0/18:2)	DG	C47 H88 O5	DG(26:0/18:2)+NH4	B	0.572238	0.468455	0.428223	0.472476	0.43777	0.520816	0.496791	0.588012	0.485508	0.645729	0.624627	0.469481	0.39768	0.498294	0.549171	0.651537	0.425163	0.348778	0.439554	0.48586	0.619348	0.633758	0.777302	0.611067	0.551058	2.50458	2.46802	1.33423	1.95324	2.20408	1.47698	1.66774	1.35849	2.63141	1.57178	0.949647	1.08416	0.776779	0.953138	0.688005	0.901658	0.592258
114	75	7.245	DG(27:2)	DG	C30 H54 O5	DG(27:2)+H	C	0.282957	0.003363	0.296796	0.16437	0.199266	0.359212	1.29642	0.381637	0.379166	0.769059	1.58781	0.54161	0.620771	1.40665	0.875472	0.695102	0.656398	0.336712	0.830205	0.773893	0.604302	0.994	1.00342	0.447617	0.538742	0.302475	0.594498	0.353714	0.40118	0.518958	0.178949	0.383659	0.871609	0.695673	0.419375	0.676054	0.955962	0.620169	0.848372	0.983471	0.455255	0.434617
115	76	4.318	DG(27:2)	DG	C30 H54 O5	DG(27:2)+Na	C	0.435541	0.44483	0.399393	0.427096	0.408092	0.74185	0.537043	0.550525	0.597516	1.10223	0.656466	0.535331	1.21646	1.2935	1.38092	1.2998	0.624032	0.52654	1.44656	0.604797	1.3647	1.44113	1.1925	0.586716	1.35746	1.35273	1.19111	1.6976	1.79594	1.405	1.46652	1.43113	1.35329	1.47882	1.55577	1.59513	1.46252	0.607623	0.569558	0.646196	1.49268	1.54718
116	77	3.778	DG(27:3)	DG	C30 H52 O5	DG(27:3)+H	C	1.18274	1.46494	0.888427	1.00948	1.50317	1.00493	1.12056	1.47032	1.03645	0.914562	1.23369	1.13946	0.975677	1.06616	0.99084	1.51842	1.0656	0.973711	0.989416	0.836302	0.959177	1.07356	1.0133	0.894502	0.961458	1.10401	0.903191	1.1106	0.927425	0.782043	1.1497	1.22889	1.16223	1.02899	0.951986	1.16423	1.19775	1.06667	1.00266	1.00589	1.12536	0.981211
117	78	4.763	DG(27:3)	DG	C30 H52 O5	DG(27:3)+H	C	1.33909	1.46198	0.836405	1.14141	0.255434	0.51434	1.55009	1.54387	0.525983	0.720394	1.20684	1.43246	0.698856	0.568819	0.618176	1.05195	0.188997	0.0874735	0.68995	1.2896	0.950393	1.20219	1.62535	0.694004	0.450763	1.12763	1.47535	1.28896	0.613574	0.923729	0.532229	0.921478	0.624025	0.719787	1.37275	0.523039	0.751492	0.81872	1.24679	0.365574	1.02826	1.38229
118	79	6.9	DG(27:3)	DG	C30 H52 O5	DG(27:3)+H	C	0.425418	0.517017	0.439551	0.397887	0.330474	0.455397	1.03372	0.577275	0.565719	0.86839	1.93208	0.588829	0.550057	0.915057	0.917548	0.627685	0.660457	0.523277	0.568707	0.730473	0.558513	0.648254	1.02776	0.414211	0.748369	0.638831	0.509914	0.527008	0.499623	0.514354	0.513989	0.638722	1.16416	0.497649	0.605376	1.19143	1.15011	0.9523	0.819646	0.891677	0.776808	0.385713
119	80	7.284	DG(27:3)	DG	C30 H52 O5	DG(27:3)+H	C	0.317367	0.374119	0.253354	0.322887	0.393196	0.583338	0.933485	0.476058	0.586856	0.777247	1.69058	0.584359	0.728015	1.16793	0.90759	0.62612	0.765645	0.348433	0.578309	0.978921	0.40753	0.845219	1.02142	0.474439	0.710326	0.366223	0.628083	0.455303	0.528428	0.833682	0.387378	0.310113	0.929147	0.60546	0.48092	0.597558	0.827828	0.685298	0.640455	0.854366	0.618635	0.447172
120	81	7.808	DG(27:3)	DG	C30 H52 O5	DG(27:3)+H	C	0.368783	0.426747	0.714143	0.319498	0.248722	2.0381	1.01468	0.233483	0.352411	0.304971	1.25185	0.381111	0.493586	0.559256	0.46264	1.06273	0.897727	0.938185	0.569164	0.58861	4.28259	1.14303	2.06007	3.8043	2.77999	0.951099	0.291241	0.73072	0.904106	0.355925	0.567608	0.504361	0.910609	1.00454	0.383365	0.0589431	1.75682	1.29326	0.799676	0.880237	4.72038	6.49398
121	82	3.49	DG(27:4)	DG	C30 H50 O5	DG(27:4)+H	C	1.00783	0.906415	0.887109	0.774864	0.729574	1.00928	0.913254	0.95083	0.82133	0.906095	0.95892	0.996544	0.939544	0.899809	0.826107	0.924927	0.967658	0.835086	0.870869	0.768963	1.18601	1.0313	0.892275	0.967133	1.0177	1.22084	1.08981	0.894826	0.847383	0.947519	0.915281	0.966099	0.884518	0.850056	0.846158	0.890067	0.918964	0.888676	0.808257	0.731345	0.972496	1.0361
122	83	7.184	DG(27:4)	DG	C30 H50 O5	DG(27:4)+H	C	1.78407	1.36124	0.540215	2.75509	0.988403	0.638662	2.30455	4.67139	0.0134748	0.553412	1.00582	2.48444	0.629608	0.377675	0.641155	1.26424	1.5027	2.679	4.63686	0.3292	5.9872	1.01999	0.523932	7.41933	7.81795	1.84684	3.34219	3.12207	1.29668	1.28046	2.89205	0.870383	1.63414	4.04912	0.813283	2.41778	3.15396	2.36091	5.09594	5.13989	2.87882	7.09455
123	84	7.281	DG(28:1p)	DG	C31 H58 O4	DG(28:1p)+H	C	0.934509	1.17032	1.00822	1.06933	0.890554	0.616034	0.744932	0.659229	0.544321	0.636503	0.506889	0.876694	0.801047	0.944771	0.807199	0.873766	0.765733	1.04675	0.981081	0.836385	1.01496	1.00837	0.908497	0.963239	0.903321	1.20579	1.03056	1.22297	1.38786	1.33416	1.32856	1.23853	1.15202	1.12629	1.10249	1.20044	1.25722	1.39116	1.66998	1.97462	1.24513	1.14093
124	85	8.037	DG(28:1p)	DG	C31 H58 O4	DG(28:1p)+H	C	1.2492	1.05642	1.12687	1.63824	1.13328	0.615436	0.83724	1.15166	0.787488	0.805145	0.85301	0.89206	1.05478	1.01285	1.39387	0.763962	0.783557	0.736105	1.59644	0.476224	0.910415	1.04794	0.669976	1.13594	1.30961	1.20724	0.50067	0.776727	1.04738	1.21013	0.809854	1.09005	0.964584	0.72558	0.971033	0.413484	0.965019	0.599218	1.069	1.60115	1.12739	1.38372
125	86	3.776	DG(28:4)	DG	C31 H52 O5	DG(28:4)+Na	C	0.976059	1.7082	1.44651	1.28939	1.02672	0.734857	0.95681	0.982334	0.688042	1.45977	0.902819	0.536769	0.491074	0.563512	0.608529	0.292942	0.302812	0.263752	0.327614	0.649651	0.169163	0.287315	0.303494	0.161174	0.180526	0.311374	0.247077	0.0992912	0.477952	0.33559	0.117247	0.0947208	0.158328	0.18541	0.159663	0.0539033	0.149585	0.0619157	0.142264	0.110323	0.117232	0.092001
126	87	8.917	DG(30:0e)	DG	C33 H66 O4	DG(30:0e)+Na	C	0.442095	0.81863	0.60827	0.534819	0.5001	0.506336	0.461819	0.451475	0.669515	0.469466	0.715735	0.53155	0.748528	0.19603	0.653999	1.15465	0.191598	0.727413	0.845863	0.982128	1.08168	0.680225	0.959778	0.668735	0.807201	1.02254	0.827851	1.08876	0.991847	0.696559	1.02853	1.04067	1.37315	1.92442	0.960695	1.29767	1.73832	0.891865	0.925821	1.61967	1.84853	1.37379
127	88	5.326	DG(30:1)	DG	C33 H62 O5	DG(30:1)+NH4	C	1.26309	0.915493	1.02083	0.952018	0.992816	1.32528	1.26022	1.1166	1.15236	1.11374	1.19501	1.21809	1.23966	1.25064	1.31034	1.28649	1.29172	1.36718	1.30865	1.1701	1.63436	1.35079	1.29123	1.51412	2.02423	1.40205	1.1822	1.11428	0.8592	1.02496	1.32944	1.27952	1.1419	0.842942	1.19461	1.32628	1.2449	1.17866	1.44375	1.61634	1.41032	1.39398
128	89	6.644	DG(30:1p)	DG	C33 H62 O4	DG(30:1p)+NH4	C	0.905308	0.884	0.849963	0.816231	0.762518	1.49766	1.18274	0.735201	0.941282	0.78848	0.738746	0.999248	1.25289	0.840295	1.12507	0.855191	0.858511	2.24462	1.24695	1.3361	1.20117	0.903916	1.20319	0.843546	0.812037	2.02883	0.83416	0.828177	0.820408	0.813898	0.879726	0.852066	0.961241	0.859241	0.74799	0.937413	0.769961	1.21746	0.766014	0.694188	1.22804	0.863052
129	90	8.676	DG(30:2p)	DG	C33 H60 O4	DG(30:2p)+H	C	0.191505	0.449964	0.00973071	0.513994	0.41138	0.00517049	0.609556	0.401225	0.189858	0.307444	0.3919	0.46341	0.724771	0.60936	0.00302421	0.893521	1.06735	1.07739	0.00888487	1.06195	1.16982	0.737099	0.586463	0.768937	0.93379	1.50281	1.08216	0.884458	0.665563	0.478795	0.949058	1.42009	0.00892006	1.64784	1.87581	2.53096	2.05922	2.10182	1.16717	0.00792333	1.63651	1.33566
130	91	5.08	DG(30:3)	DG	C33 H58 O5	DG(30:3)+H	C	1.07394	0.615251	0.474589	0.540172	0.32788	0.904209	0.803154	0.714098	0.715158	0.755372	1.40976	1.81711	0.901441	1.25128	1.03383	0.955448	1.23316	0.905578	1.00207	0.891123	0.98306	0.899646	1.05655	0.971384	1.17338	1.13337	0.925036	0.946106	0.783032	0.745098	1.14903	1.04549	0.901147	0.490397	1.07967	1.28597	1.07461	0.874428	0.86158	1.00111	1.02412	1.36449
131	92	4.307	DG(30:5)	DG	C33 H54 O5	DG(30:5)+H	C	0.764254	0.703688	0.808005	0.599947	0.584544	0.829	0.880603	0.827894	0.726506	0.804314	0.957368	0.717153	0.739796	0.758679	0.82576	0.913578	0.719009	0.550433	0.603347	0.59995	0.660374	0.650288	0.8196	0.540428	0.628973	1.00663	1.02228	0.762498	0.869128	0.662212	0.586582	0.605271	0.66431	0.69184	0.562867	0.677784	0.588009	0.62436	0.522607	0.554322	0.753821	0.593825
132	93	9.085	DG(31:1p)	DG	C34 H64 O4	DG(31:1p)+H	C	0.366352	0.567024	0.388999	0.49965	0.448765	0.667447	0.630338	0.686652	0.482469	0.736357	0.64206	0.604629	0.722255	0.697258	0.6532	0.441256	0.592692	0.684121	0.740996	1.0695	0.64254	0.679105	0.398778	0.542935	0.524906	0.695459	1.24401	1.07707	0.985654	0.849459	0.878726	1.10398	1.32704	0.948185	1.43984	1.18656	1.44294	0.836979	1.20694	0.98268	1.34661	0.896597
133	94	4.017	DG(31:2)	DG	C34 H62 O5	DG(31:2)+K	C	0.345724	0.263059	0.298014	0.163185	0.114051	0.822387	0.292292	0.623582	0.394566	0.499016	0.651846	0.722445	0.44116	0.254046	0.205004	0.17213	0.174765	0.0735817	0.105784	0.129657	0.0212666	0.213386	0.205784	0.00566977	0.00889525	1.22995	0.931833	0.428128	0.833192	0.690804	0.307704	0.290099	0.266196	0.686612	0.239118	0.115412	0.147725	0.135958	0.0771138	0.0945739	0.0361414	0.00638901
134	95	5.178	DG(32:1p)	DG	C35 H66 O4	DG(32:1p)+H	C	1.21807	0.646282	1.19532	1.06024	0.500705	2.34897	1.01792	1.18005	1.06227	1.311	1.34246	1.17728	1.20457	1.28195	1.16705	1.08403	1.21909	0.935462	1.62204	1.1561	1.73542	1.86777	1.49233	1.4097	1.25629	1.53019	1.39612	0.656544	0.801425	1.19995	1.45509	1.23497	0.808747	0.740384	0.800205	1.22272	1.5728	1.26482	1.06515	1.26539	1.47466	1.01979
135	96	5.724	DG(32:1p)	DG	C35 H66 O4	DG(32:1p)+H	C	0.95966	0.152575	0.719515	0.0731871	0.0836739	1.83192	0.304613	0.214109	0.703556	0.530632	0.554252	0.522022	0.488479	0.962135	0.864438	0.452237	0.329865	0.101472	0.328841	0.200124	0.670829	0.624372	0.916891	0.81183	0.66061	0.0792966	2.07769	0.188141	0.78331	0.824098	0.45306	0.23842	0.455781	0.33466	0.221173	1.02984	0.46668	0.519209	0.290751	0.302058	0.364945	0.551231
136	97	7.795	DG(32:1p)	DG	C35 H66 O4	DG(32:1p)+H	C	0.258279	0.409595	0.303843	0.37725	0.322259	0.511457	0.572846	0.456064	0.472003	0.594212	0.897972	0.721635	0.814849	0.614837	0.733933	1.10403	0.889917	0.652836	0.742786	0.870275	0.556123	0.810885	1.17305	0.549154	0.760329	1.04063	1.08022	0.845953	1.11141	0.779962	1.11523	1.08608	1.10379	1.29025	0.956678	1.17255	1.24955	1.07615	1.21671	0.902254	0.727032	0.623089
137	98	9.203	DG(32:1p)	DG	C35 H66 O4	DG(32:1p)+H	C	0.511198	0.950071	0.67118	0.667291	0.405789	0.940932	0.79792	0.729102	0.589188	0.782712	1.52992	0.806992	1.18401	1.03323	1.0644	1.04724	1.29847	0.800502	1.11426	1.00932	1.10803	0.971535	1.31827	1.01606	1.32539	1.33825	0.969161	0.96585	1.22494	0.967106	1.21101	1.28741	0.563583	1.65364	1.17438	1.35585	1.29146	1.12816	1.15838	1.22846	1.29877	0.732204
138	99	7.12	DG(32:1p)	DG	C35 H66 O4	DG(32:1p)+NH4	C	1.08011	0.960985	1.08946	1.05917	1.66686	1.34982	1.05318	0.916072	0.955293	0.906075	1.04224	1.08106	1.11208	0.903119	1.02222	1.23376	0.962888	0.957759	1.09357	0.994329	1.14761	1.12579	1.14701	1.14612	1.0897	1.03447	1.07995	0.951275	0.894502	1.65252	1.16751	0.985319	1.84246	1.1072	1.83649	0.990278	0.90857	1.08535	1.00725	1.01234	1.16742	1.05167
139	100	4.219	DG(32:2)	DG	C35 H64 O5	DG(32:2)+K	C	0.0376412	0.0290003	0.0293229	0.000229791	0.0196018	1.93595	0.680709	1.10487	0.588771	1.147	1.52467	2.03292	1.41119	0.687872	0.463255	0.533859	0.412005	0.160524	0.200647	0.418951	0.0394804	0.728411	0.697939	0	0.0125717	0.378167	0.052457	0.00703193	0.0688583	0.0635603	0.0829661	0.0109486	0.000225907	0.000822659	0.000361139	0.0178267	0	0.00035449	0.00676696	0.0141988	0	0
140	101	4.646	DG(32:2p)	DG	C35 H64 O4	DG(32:2p)+H	C	0.595543	0.428355	0.522414	0.747194	0.514638	0.521232	1.14823	0.853201	1.12826	0.513393	0.644894	0.42759	0.486321	0.66983	0.699165	0.993489	0.798288	1.00929	0.755272	0.665279	0.300685	0.676601	0.711112	0.399544	0.363823	0.753225	1.47612	0.887697	1.08627	1.18849	1.37212	1.19525	1.85873	1.80824	1.67651	1.14973	1.23779	1.22649	1.15417	0.948089	0.916556	0.509453
141	102	5.024	DG(32:2p)	DG	C35 H64 O4	DG(32:2p)+H	C	2.16105	0.263071	0.59033	0.180333	0.650495	0.315987	0.542483	0.312975	0.688711	0.0065818	1.59889	0.583205	1.96738	0.262333	1.06869	0.12384	0.167448	0.350529	0.544399	0.66599	1.70338	0.51139	0.512531	1.9717	2.17558	3.24049	1.57596	0.936068	0.854623	1.20488	1.31055	3.85839	1.54972	0.426691	1.07065	0.636739	0.574218	1.08844	4.13943	0.93099	9.20803	4.95495
142	103	7.841	DG(32:2p)	DG	C35 H64 O4	DG(32:2p)+H	C	0.0843561	0	0.00203539	0.179217	0.0934816	0	0	0.147325	0.269761	0.252341	0.224674	0.316951	0.458077	0.420704	0.269358	0.745044	0.867384	0.327707	0.683429	0.87044	0.210235	0.599091	1.14967	0.185222	0.859295	0.689756	0.179652	0.150449	0.641451	0.676444	1.3928	0.00888314	1.91048	1.90419	0.79409	1.93383	1.14505	1.185	0.130752	0.308355	0.507356	0.393402
143	104	8.917	DG(32:2p)	DG	C35 H64 O4	DG(32:2p)+H	C	0.40114	0.742793	0.551921	0.485274	0.453771	0.459429	0.419036	0.409651	0.607492	0.425975	0.64943	0.482308	0.679185	0.34406	0.593413	1.04768	0.617788	0.660026	0.767503	0.891144	0.98147	1.03262	0.951964	0.606784	0.732423	0.927814	0.75116	0.987899	0.899963	0.63203	0.933246	0.94426	1.24594	1.74615	0.959429	1.17745	1.57729	0.809243	0.840054	1.46962	1.67728	1.24653
144	105	9.335	DG(33:1p)	DG	C36 H68 O4	DG(33:1p)+H	C	0.423874	0.463207	0.40832	0.448347	0.42189	0.471118	0.725873	0.554685	0.489058	0.623387	0.619593	0.581393	0.590818	0.623109	0.58527	0.654662	0.458278	0.412314	0.677579	0.586245	0.442808	0.532944	0.535248	0.478289	0.527274	1.16768	1.36715	0.937956	1.21355	1.03706	1.25354	1.30113	1.06303	1.77802	1.15011	1.24193	1.0821	1.79644	0.23628	1.33554	1.266	0.180444
145	106	4.33	DG(33:2)	DG	C36 H66 O5	DG(33:2)+NH4	C	0.413874	0.500214	0.66625	0.386593	0.367438	0.503266	0.516953	0.562252	0.569801	0.744256	0.451709	0.395504	0.408667	0.49132	0.472925	0.36224	0.277146	0.232307	0.29694	0.325262	0.281641	0.430019	0.564978	0.215255	0.2754	0.983221	0.924694	0.46083	0.867916	0.68756	0.386052	0.393465	0.636398	0.818555	0.519059	0.534709	0.531404	0.612137	0.344134	0.296343	0.458357	0.228477
146	107	4.845	DG(33:2p)	DG	C36 H66 O4	DG(33:2p)+H	C	0.281468	1.01512	0.546639	0.976653	0.63612	1.41967	0.97103	1.24752	0.633284	0.21402	0.17086	0.33063	0.547015	0.575496	1.0425	0.347333	0.325784	0.752568	0.347014	0.177102	1.04922	1.54099	2.00255	0.819217	0.915038	3.20888	4.93535	3.91585	1.546	3.81681	2.43249	2.90654	4.22842	5.48889	5.25548	3.16055	3.63988	3.36028	3.40469	2.96154	2.34159	2.23636
147	108	5.289	DG(33:2p)	DG	C36 H66 O4	DG(33:2p)+H	C	0.589711	0.749963	0.795952	0.309827	0.730917	0.535436	0.36921	0.413949	0.306219	0.30638	0.586475	0.265528	0.0175091	0.265871	0.278643	0.129025	0.175976	0.063515	0.209333	0.11502	0.0901483	0.310899	0.472288	0.2254	0.329103	5.163	0.0302907	2.01109	1.81834	0.0787099	0.683638	0.700241	1.31374	1.37725	0.978588	1.16249	0.76821	1.01634	0.884001	0.685947	2.10707	1.08626
148	109	6.433	DG(33:2p)	DG	C36 H66 O4	DG(33:2p)+H	C	0.135057	0.135033	0.0908986	0.114525	0	0.276391	0.249788	0.210121	0.27712	0.336431	0.372873	0.133696	0.209586	0.272359	0.272022	0.334381	0.191441	0.19654	0.178426	0.310839	0.35023	0.553936	0.635062	0.357743	0.395759	1.68455	1.64215	0.735169	1.08305	0.812185	1.06425	1.03187	1.34248	1.42479	1.13058	1.38794	1.25094	1.69272	0.723295	0.780284	1.38267	0.53833
149	110	9.086	DG(33:2p)	DG	C36 H66 O4	DG(33:2p)+H	C	0.424391	0.463777	0.487802	0.540903	0.446762	0.52378	0.459918	0.566633	0.537472	0.513679	0.630717	0.521478	0.566041	0.622357	0.524927	0.551325	0.557035	0.513361	0.553425	0.640175	0.58653	0.629915	0.596057	0.507568	0.571583	0.851015	1.15309	0.770119	0.888303	0.858756	1.01045	0.977426	1.20957	1.36182	1.09967	1.1466	1.17379	1.17698	1.09453	0.817118	1.11825	0.799687
150	111	4.516	DG(33:3p)	DG	C36 H64 O4	DG(33:3p)+H	C	1.01895	1.31489	0.950508	1.42378	1.22309	0.636369	1.40886	1.39968	1.41027	0.59141	0.43909	0.410442	0.269125	0.337133	0.255013	0.244218	0.190329	0.26441	0.197143	0.217943	0.193432	0.316317	0.348824	0.124117	0.163435	0.939758	1.61102	1.67839	1.94144	1.43015	0.73865	0.657195	0.96527	1.60682	1.10639	0.642534	0.6416	0.677617	0.622411	0.499695	0.379529	0.317376
151	112	8.591	DG(33:3p)	DG	C36 H64 O4	DG(33:3p)+H	C	0.4798	0.549449	0.466109	0.476163	0.387244	0.598532	0.678753	0.744853	0.6406	0.863192	0.849767	0.691313	0.753907	0.838319	0.980275	0.642876	0.665335	0.635754	0.553888	0.588067	0.572726	0.793698	0.922226	0.450865	0.614476	1.30435	1.22222	0.862843	1.34569	0.860511	0.915978	1.06338	1.21174	1.06922	0.973603	1.04471	1.04323	1.23325	1.01814	0.652896	0.97948	0.679831
152	113	3.832	DG(33:4)	DG	C36 H62 O5	DG(33:4)+H	C	3.47756	1.38741	2.60671	0.0882725	0.323853	2.47154	2.26505	1.09966	1.55563	2.09738	1.88967	1.55036	0.209956	0.783285	1.53513	0.143832	0.193365	0.260118	0.222542	0.124125	0.17395	0.176733	0.25684	0.152639	0.142028	12.1463	8.23036	0.234669	0.376439	1.6071	0.0996067	0.0819336	0.333992	0.101459	0.370729	0.178515	0.181998	0.233387	0.0698844	0.0901787	0.191875	0.145039
153	114	5.991	DG(34:1p)	DG	C37 H70 O4	DG(34:1p)+H	C	0.310068	0	0.198588	0.133314	0.00204542	0.197555	0.00551806	0.112739	0.00398183	0.129011	0.162253	0.113318	0.461366	0.509179	0.730586	4.58047	0.848571	1.02818	1.44575	0.586161	0.112072	0.37733	0.583771	0.058216	0.410855	1.90896	1.04396	0.00171227	0.360247	0.646614	0.372363	0.814724	0.419003	6.98646	1.22282	1.31478	0.597432	0.77665	0.846046	2.43366	2.35164	1.64035
154	115	7.566	DG(34:1p)	DG	C37 H70 O4	DG(34:1p)+Na	C	1.59093	1.31488	2.04342	1.35838	1.89559	1.36709	1.20417	1.09762	1.34465	0.973621	1.01174	1.42897	1.38102	1.1705	1.18919	1.46342	1.29533	1.44762	1.37851	1.15034	1.3437	1.29957	1.38774	1.56045	1.06095	1.15718	1.20496	3.42044	1.43668	1.32153	1.73844	1.55112	1.28316	1.16717	1.39072	1.25621	1.43339	1.47542	1.38865	1.48538	1.65373	1.71801
155	116	6.25	DG(34:1p)	DG	C37 H70 O4	DG(34:1p)+NH4	C	1.11914	1.34806	1.29827	1.29577	0.957935	0.396818	0.99122	0.675721	0.703223	0.928103	0.621998	0.374912	0.418518	0.628692	0.608783	0.448612	0.291114	0.285209	0.513615	0.481986	0.265285	0.477062	0.68546	0.241733	0.318396	0.900574	0.828949	0.441955	0.787498	0.59131	0.407479	0.342748	0.967102	0.656959	0.380413	0.400309	0.537463	0.458265	0.344562	0.403229	0.283212	0.435412
156	117	5.083	DG(34:2p)	DG	C37 H68 O4	DG(34:2p)+H	C	0.383389	0.584374	0.49551	0.607565	0.520828	0.781375	1.05419	1.21809	1.05051	0.647953	0.895227	0.791456	0.755807	0.946357	0.745932	1.62614	1.18241	1.22355	1.17469	1.06266	1.01879	1.27426	1.62486	0.897301	1.04398	0.735484	1.01132	1.22379	1.12338	1.12779	1.39643	1.25982	1.57161	1.66727	1.63155	1.45804	1.53005	1.35553	1.33282	1.31987	1.40779	0.995837
157	118	5.49	DG(34:2p)	DG	C37 H68 O4	DG(34:2p)+H	C	0.46688	0.636457	0.63459	0.435539	0.311664	0.448323	0.657558	0.625001	0.494502	0.702538	0.656653	0.565403	0.593567	0.619224	0.466757	0.437886	0.426445	0.331569	0.467868	0.476731	0.287458	0.485357	0.682427	0.27484	0.396316	1.70294	1.22867	0.658902	1.2804	1.55722	0.672614	0.627495	1.11774	1.17431	0.692111	0.756743	0.780845	0.802696	0.539561	0.543234	0.980458	0.477746
158	119	5.75	DG(34:2p)	DG	C37 H68 O4	DG(34:2p)+H	C	0.575879	0.848177	0.902218	0.834352	0.592355	0.570506	0.858463	0.919152	0.834256	0.814972	0.810525	0.666156	0.829142	0.588206	0.61217	0.614162	0.607651	0.622482	0.570788	0.647615	0.3221	0.615991	0.853659	0.374412	0.436202	1.0311	1.1391	0.992945	1.45434	1.03241	0.833852	0.660934	0.977674	1.24272	0.816517	0.770842	0.627684	0.711992	0.570941	0.510037	0.599717	0.545894
159	120	6.666	DG(34:2p)	DG	C37 H68 O4	DG(34:2p)+H	C	0.331379	0.297196	0.237605	0.245765	0.222923	0.277916	0.380956	0.299042	0.340791	0.379296	0.549874	0.399399	0.595844	0.607603	0.554163	0.744877	0.587246	0.541388	0.664425	0.661857	0.95901	1.11445	1.28192	0.635939	0.739091	1.02341	1.01993	0.626485	0.761086	0.669143	0.832789	0.801729	1.12114	1.52394	0.909502	1.20189	1.07392	1.50924	0.882651	0.625301	1.17899	0.562375
160	121	7.562	DG(34:2p)	DG	C37 H68 O4	DG(34:2p)+H	C	0.262283	0.38733	0.448549	0.358385	0.471164	0.241968	0.623071	0.332023	0.435518	0.410051	1.0795	0.637841	0.810434	0.941242	0.811049	0.956508	1.23697	0.71006	0.745223	0.983301	0.794605	0.901473	1.16457	0.569195	0.617595	0.815954	0.598374	0.394489	0.708875	0.509468	0.435642	0.607016	0.820964	1.00268	0.635812	0.490566	0.562166	0.687902	0.571178	0.344853	0.493159	0.262387
161	122	7.846	DG(34:2p)	DG	C37 H68 O4	DG(34:2p)+H	C	0.226607	0.335757	0.222583	0.273627	0.279657	0.268958	0.30531	0.449431	0.425219	0.372974	0.718313	0.647437	0.945909	0.931461	0.857043	1.57712	1.15744	1.01292	1.24966	1.0905	0.988642	1.30404	1.54574	0.793839	1.13772	0.645235	0.656064	0.74013	0.845307	0.571571	0.712259	0.729554	0.921673	1.26735	0.821299	0.945254	0.938849	1.0288	0.724153	0.531257	0.671628	0.377259
162	123	8.141	DG(34:2p)	DG	C37 H68 O4	DG(34:2p)+H	C	0.315163	0.148593	0.394668	0.361157	0.075319	0.14579	0.203093	0.385774	0.416163	0.478401	0.779704	0.582105	0.830697	0.834665	0.635603	0.823446	1.01387	0.571173	0.616521	0.653457	0.610491	1.06834	1.27799	0.450886	0.612524	0.436428	0.54195	0.678874	0.533621	0.70767	0.431199	0.768457	1.15572	1.37172	0.866071	0.609751	0.997123	0.733363	0.888895	0.80766	1.03017	0.318428
163	124	9.18	DG(34:2p)	DG	C37 H68 O4	DG(34:2p)+H	C	0.72721	0.811368	0.772727	0.8724	0.742021	0.71932	0.767378	0.739441	0.69071	0.68689	1.01639	0.876107	1.06028	0.971908	1.01989	1.20462	1.15361	1.0057	1.07184	0.884157	1.15116	1.13992	1.16334	1.25398	0.912815	0.880887	0.96053	1.35221	0.911775	1.00982	1.16962	1.14858	1.13557	1.0166	0.935135	1.51763	1.02956	1.19875	1.09097	1.09929	1.27078	1.01893
164	125	9.441	DG(34:2p)	DG	C37 H68 O4	DG(34:2p)+H	C	0.62903	0.483408	0.492065	0.68732	0.607662	0.544071	0.70291	0.803367	0.669947	0.694773	1.32733	0.918735	0.939384	0.916125	0.987333	1.2801	1.19623	0.890908	0.985131	0.9178	1.22551	1.12491	1.09427	1.01122	1.043	0.9391	1.18243	0.894266	0.912765	0.855733	0.773035	0.931533	0.910306	1.08538	0.843463	0.98205	0.925158	0.947999	0.944878	0.732937	1.07275	0.82895
165	126	10.057	DG(34:2p)	DG	C37 H68 O4	DG(34:2p)+H	C	0.665269	0.650038	0.550059	0.682878	0.500694	0.576515	0.69138	0.336171	0.910996	0.26743	1.20209	0.320212	1.54121	0.860754	0.30852	0.370887	0.476108	0.296312	0.283498	0.321168	0.351079	0.258539	0.924953	1.60392	0.948856	1.07125	0.506766	0.854579	0.55852	0.359614	1.42776	0.404951	0.538441	0.377015	1.0018	1.12722	0.363266	0.433576	2.04099	1.23594	1.09597	1.15506
166	127	7.185	DG(34:2p)	DG	C37 H68 O4	DG(34:2p)+Na	C	1.05397	1.39298	1.34059	1.52209	1.14599	1.19264	0.942196	0.94606	1.17396	1.11785	0.810273	1.38014	1.37075	1.53096	1.03924	1.3411	1.48621	1.28386	1.44715	1.16054	1.15885	1.31605	1.21983	1.14109	0.999496	1.77842	1.41822	1.29135	2.30146	1.3331	1.40586	1.77782	1.45615	1.36322	1.49323	1.3181	1.34786	1.44965	1.23564	1.55523	1.31841	1.4694
167	128	5.58	DG(34:3e)	DG	C37 H68 O4	DG(34:3e)+NH4	C	0.519292	0.483622	0.615472	0.450457	0.318185	0.670765	0.758009	0.640182	0.753061	0.743384	0.602605	0.652301	0.632841	0.720772	0.625411	0.62065	0.532071	0.443051	0.454835	0.525656	0.461902	0.753407	0.699156	0.439571	0.581561	1.23893	1.22229	0.717094	1.08822	1.03521	0.766189	0.733503	1.09172	0.88691	0.795471	0.917687	1.01022	0.89241	0.700908	0.584603	0.915082	0.537062
168	129	4.718	DG(34:3p)	DG	C37 H66 O4	DG(34:3p)+H	C	0.683513	1.11893	0.936701	1.07872	0.840934	0.783135	1.1898	1.29363	1.05357	0.701657	0.83431	0.664884	0.606413	0.736259	0.63831	0.548626	0.611697	0.48383	0.506546	0.65965	0.323477	0.487501	0.632951	0.247228	0.354603	0.637909	1.03305	1.24066	1.05862	0.936511	0.883518	0.824526	1.46818	1.25241	1.06634	0.812912	1.15933	1.07732	0.785427	0.640431	0.724847	0.444496
169	130	5.096	DG(34:3p)	DG	C37 H66 O4	DG(34:3p)+H	C	1.34285	1.07852	1.50885	0.923501	0.670583	0.680575	0.797882	0.743233	0.602468	0.770773	0.979882	0.774086	0.885281	0.734946	0.657277	0.418694	0.415773	0.350962	0.344234	0.426431	0.363792	0.432821	0.440734	0.30319	0.403323	1.4627	1.72418	0.681464	1.47239	0.964584	0.63137	0.651742	0.984895	0.892551	0.612033	0.689489	0.75828	0.581803	0.529886	0.535934	0.533199	0.744168
170	131	5.382	DG(34:3p)	DG	C37 H66 O4	DG(34:3p)+H	C	1.10155	1.59019	1.40944	1.43241	1.15281	0.694256	0.939169	1.11441	1.07815	0.96029	0.795764	0.697327	0.688817	0.652824	0.657042	0.578689	0.572004	0.536877	0.571711	0.677997	0.196252	0.30796	0.425511	0.240845	0.220666	0.814139	1.03444	1.00516	1.20706	0.737946	0.727445	0.681769	0.914888	1.03729	0.808097	0.547225	0.56626	0.410802	0.328294	0.354736	0.281023	0.225441
171	132	6.278	DG(34:3p)	DG	C37 H66 O4	DG(34:3p)+H	C	0.61357	0.554532	0.48744	0.571597	0.443452	0.609523	0.664435	0.578401	0.573718	0.648097	0.887637	0.664237	0.731249	0.786749	0.731285	0.71892	0.653377	0.600135	0.730539	0.667651	0.770583	0.806713	0.894991	0.672467	0.715049	1.18107	1.19852	0.800923	0.996389	0.912051	0.776418	0.828777	1.05909	1.15954	0.874535	1.06818	0.97503	1.02915	0.870723	0.694	0.978487	0.672501
172	133	7.562	DG(34:3p)	DG	C37 H66 O4	DG(34:3p)+H	C	0.29938	0.387983	0.326979	0.37502	0.273982	0.294878	0.583842	0.423852	0.449374	0.499155	0.655914	0.734172	0.758213	0.985955	0.87606	1.24079	1.06082	1.04243	1.14873	0.991831	1.05029	1.16433	1.57217	0.573234	0.702786	0.604915	0.548523	0.449419	0.830046	0.447764	0.647776	0.631422	1.02742	1.03104	0.757644	0.752481	0.895722	1.139	0.584712	0.478865	0.589536	0.408851
173	134	8.714	DG(34:3p)	DG	C37 H66 O4	DG(34:3p)+H	C	0.832856	0.530025	0.8855	0.632514	0.709922	0.610808	0.958561	0.974734	1.08023	0.95337	1.06611	1.36591	1.10841	1.67493	1.07794	1.90564	1.42914	1.23772	0.0468596	1.54231	0.928899	1.08308	1.05442	1.66887	0.993988	1.05628	1.28085	0.72424	0.766259	0.756746	1.20389	1.16109	1.11856	0.979733	0.811335	1.07468	0.890106	1.04921	0.751427	0.584125	0.812266	0.514221
174	135	9.877	DG(34:3p)	DG	C37 H66 O4	DG(34:3p)+H	C	0.654901	0.528861	0.468595	0.782176	0.482654	0.563531	0.795456	0.655164	0.96506	0.674778	0.99303	0.947398	1.11364	0.909503	1.13494	0.836133	0.81799	0.447633	0.876209	0.623301	0.667287	1.00899	0.68233	0.81515	0.713289	1.30679	1.13176	0.979723	0.988572	0.848466	1.22975	1.15734	1.41805	1.93188	0.944603	1.03285	0.888377	1.70065	0.827043	0.89866	0.788476	0.600584
175	136	4.33	DG(34:4)	DG	C37 H64 O5	DG(34:4)+NH4	C	0.432209	0.133965	0.121344	0.0307957	0.149	0.332148	0.448599	0.466443	0.47591	0.492856	0.439393	0.32446	0.278381	0.363421	0.387615	0.281745	0.161409	0.125379	0.204373	0.321165	0.0963483	0.199523	0.28089	0.0773219	0.100772	0.210851	0.286573	0.114462	0.181997	0.12468	0.0964537	0.103512	0.0518152	0.209962	0.183179	0.0384283	0.130522	0.0205861	0.0284024	0.0642252	0.114699	0.0154402
176	137	4.421	DG(34:4p)	DG	C37 H64 O4	DG(34:4p)+H	C	1.43677	2.32791	1.85541	1.93954	1.9481	0.792005	1.36327	1.30579	1.01227	0.762134	0.74519	0.739637	0.694153	0.846623	0.621532	0.611787	0.596862	0.538939	0.613443	0.675433	0.434938	0.615211	0.787105	0.362862	0.396698	0.196741	0.345136	0.473978	0.238045	0.475552	0.205286	0.375282	0.362687	0.577549	0.206651	0.353934	0.394174	0.176541	0.255723	0.323963	0.286013	0.30934
177	138	9.37	DG(35:1p)	DG	C38 H72 O4	DG(35:1p)+H	C	0.551323	0.330104	0.193233	0.514926	0.25426	0.172875	0.26971	0.431139	0.198092	0.292238	0.270158	0.41606	0.690711	0.266866	0.656935	0.555969	0.319226	0.61993	0.629094	0.696499	0.149504	0.218446	0.542709	0.49342	0.627641	1.26759	1.33268	0.4048	1.18513	0.613702	1.513	0.905586	0.778403	1.69056	0.839794	1.017	1.4247	1.37439	1.34228	1.49194	2.09211	1.47992
178	139	9.797	DG(35:1p)	DG	C38 H72 O4	DG(35:1p)+H	C	0.202036	0.355804	0.226819	0.275406	0.307255	0.0952179	0.0860542	0.248807	0.0401695	0.0997856	0.100452	0.0723479	0.13251	0.120254	0.110236	0.201002	0.358727	0.153374	0.288894	0.270865	0.00165742	0.12098	0.0577978	0.0529695	0.124613	0.24588	0.21241	0.0866271	0.203215	0.353519	1.26975	0.98176	0.747737	3.2655	1.38738	1.71324	1.51209	1.30846	2.73526	3.83128	3.62636	2.19405
179	140	10.338	DG(35:1p)	DG	C38 H72 O4	DG(35:1p)+H	C	0	0	0	0	0.394179	0	0	0	0.0028984	0	0	0	0	0	0.00238195	0.53958	0	0.386632	0.430312	0	0	0.597546	1.59182	0	0	0	1.07663	0.0547659	0	0.428254	1.91406	2.18041	0.824277	6.50819	1.98749	0.777801	2.1169	2.45826	3.23061	4.55492	4.11933	3.6256
180	141	5.313	DG(35:2p)	DG	C38 H70 O4	DG(35:2p)+H	C	0.477447	0.609258	0.67738	0.691798	0.556313	0.555634	0.665407	0.634463	0.507157	0.358921	0.345458	0.321296	0.293233	0.317614	0.307099	0.375597	0.268503	0.28045	0.309071	0.247967	0.28468	0.384877	0.547571	0.285101	0.368773	2.65704	3.55702	3.41374	2.47363	3.1351	1.72421	2.01588	1.55441	2.78637	2.12571	1.21863	1.15782	1.34143	1.34404	1.57457	1.31372	1.05524
181	142	5.734	DG(35:2p)	DG	C38 H70 O4	DG(35:2p)+H	C	0.429163	0.574935	0.746215	0.455714	0.339099	0.492783	0.464606	0.308427	0.263305	0.721169	0.354486	0.227	0.161704	0.213539	0.222854	0.2609	0.0955275	0.062519	0.12485	0.157869	0.096592	0.0763794	0.27284	0.143594	0.0761802	2.58644	3.13341	1.31117	3.16865	1.42005	1.02485	0.902514	0.914819	2.05173	0.897638	0.648315	0.748968	0.743149	0.792698	0.688321	0.633174	0.488179
182	143	9.564	DG(35:2p)	DG	C38 H70 O4	DG(35:2p)+H	C	0.871063	0.534719	0.450356	0.923776	0.451971	0.538037	0.699917	0.999375	0.868046	0.576338	0.566954	0.592019	0.824381	0.572042	0.648008	0.480032	0.950495	0.827422	1.04482	0.893483	0.867972	0.848387	1.03082	0.926412	1.04969	1.29674	1.05638	1.67564	0.0483447	0.0768402	1.0612	2.21544	1.05978	2.53862	1.32648	2.02905	1.75863	1.62083	1.67867	0.0795689	0.063106	0.115045
183	144	9.78	DG(35:2p)	DG	C38 H70 O4	DG(35:2p)+H	C	0.584089	0.74255	0.514495	0.390508	0.426927	0.396469	0.766556	0.398816	0.380661	0.843845	0.580292	0.214404	0.583985	0.754639	0.0754029	0.553648	0.426026	0.547023	0.689031	0.880241	0.714852	0.190698	0.675634	0.431455	0.311894	1.59339	2.1176	1.09596	0.450134	1.02479	2.92344	1.19526	1.4783	3.46669	1.69107	1.25647	1.87603	1.64734	2.12226	3.44724	0.901639	1.32447
184	145	9.095	DG(35:3p)	DG	C38 H68 O4	DG(35:3p)+H	C	0.443271	0.51166	0.505941	0.494398	0.407843	0.399358	0.489153	0.502386	0.47843	0.550368	0.550209	0.417177	0.510331	0.555389	0.454286	0.479452	0.477316	0.428792	0.514626	0.557823	0.388777	0.508918	0.482762	0.425765	0.505508	1.01898	1.3635	0.890114	1.12344	0.930491	1.0442	1.07937	1.19386	1.49801	1.1184	1.22853	1.27459	1.37091	1.15	0.944476	1.15546	0.885637
185	146	6.378	DG(35:6)	DG	C38 H62 O5	DG(35:6)+Na	C	1.52697	1.49625	1.40205	1.37274	1.28159	1.05327	0.945883	1.08142	0.954863	0.845436	0.890367	1.14434	1.06339	0.932386	0.99076	1.27642	1.12749	1.3717	1.3442	1.05694	1.47371	1.21522	1.07189	1.35955	1.18633	1.26147	1.36611	1.74298	1.23799	1.35196	1.27879	1.2298	1.04024	0.922415	1.24558	1.27735	1.08173	1.18722	1.48941	1.08624	1.10038	1.38557
186	147	9.484	DG(36:1p)	DG	C39 H74 O4	DG(36:1p)+H	C	0.393273	0.438811	0.366287	0.290861	0.390355	0.399558	0.304701	0.729756	0.812438	0.652629	1.19323	0.873824	0.952676	1.01443	1.09698	1.35505	1.10039	1.23544	0.844675	1.16973	0.487824	0.901163	0.765037	0.542389	0.943014	0.475163	1.07972	0.588419	0.507796	0.642836	0.665605	1.05606	0.95555	1.137	1.09483	1.30975	1.25008	1.3252	1.40462	1.60624	1.91401	1.26379
187	148	9.894	DG(36:1p)	DG	C39 H74 O4	DG(36:1p)+H	C	0.369601	0.311882	0.24375	0.359962	0.243276	0.120937	0.216957	0.0544397	0.176759	0.206809	0.589338	0.454854	0.499241	0.548197	0.560824	1.21529	1.02252	0.801975	1.38696	0.980286	0.870075	1.15012	0.92005	0.613745	0.849422	0.280035	0.590155	0.436358	0.1246	0.283	0.719474	0.658334	0.661515	1.74141	0.879194	1.29997	1.22154	1.27391	1.65647	1.89192	2.11321	1.35144
188	149	7.575	DG(36:2p)	DG	C39 H72 O4	DG(36:2p)+H	C	1.09976	1.17873	1.06196	0.91908	1.00359	0.964102	0.956947	1.02157	0.927147	0.843428	0.970802	1.06836	0.998917	0.964715	1.12816	1.1758	0.97966	0.997772	0.925943	0.953981	1.04374	1.06594	1.0155	0.820948	1.15485	0.941008	0.908233	0.849868	1.1688	0.911655	1.14989	1.00138	1.15786	0.929013	1.01675	1.16567	0.896195	1.02611	1.00488	0.96667	0.978249	1.1245
189	150	9.421	DG(36:2p)	DG	C39 H72 O4	DG(36:2p)+H	C	0.605072	0.656155	0.658505	0.815656	0.542646	0.634967	0.757394	0.617372	0.558021	0.761402	0.709571	0.760652	1.37503	0.812994	0.967014	1.27247	0.975868	1.16912	1.02298	0.972023	1.19343	1.42032	1.66077	0.960672	1.36823	0.76027	0.91535	0.885081	0.778858	0.749435	0.700815	0.87663	0.784293	0.641639	0.735639	0.809545	0.682566	0.663902	0.796858	0.698274	0.912298	0.654168
190	151	10.243	DG(36:2p)	DG	C39 H72 O4	DG(36:2p)+H	C	0.735183	0.750069	0.683563	0.629404	0.680597	0.7567	0.767003	0.818873	0.954789	0.779645	1.1686	0.804597	1.33523	1.06697	1.10402	1.87937	1.36764	1.4091	1.06777	0.897622	1.82198	0.450291	3.19552	1.34537	1.17563	0.95235	1.00722	0.913193	0.36038	0.713863	1.01814	0.305686	0.44734	0.464667	0.847001	0.770696	0.319179	0.869881	1.16547	0.898009	0.890052	0.902095
191	152	5.185	DG(36:3p)	DG	C39 H70 O4	DG(36:3p)+H	C	1.05912	1.41324	1.32894	1.35304	1.22466	0.892256	1.28686	1.24698	1.20725	0.712757	0.828882	0.763346	0.733893	0.703051	0.745322	1.03042	0.98248	1.094	1.01223	0.927783	0.569533	0.726562	0.736497	0.437008	0.486618	0.534578	0.911794	0.911782	0.655311	0.680657	0.886808	0.928641	0.707673	1.23386	1.10179	0.591496	0.678194	0.746905	0.936689	1.04109	0.626383	0.513229
192	153	5.553	DG(36:3p)	DG	C39 H70 O4	DG(36:3p)+H	C	0.430222	0.334314	0.539105	0.399786	1.141	0.329081	0.396185	0.329711	0.311109	0.346795	0.882805	0.764467	1.0839	0.72924	0.66039	0.787863	0.504584	0.326426	0.564022	0.487524	1.41123	0.707191	0.551056	0.383783	0.499138	2.25669	2.19343	0.301988	0.884742	1.5273	0.699263	0.794734	1.02354	0.901016	0.833831	1.09768	1.17412	1.03343	1.09385	1.11677	1.17957	0.617713
193	154	6.344	DG(36:3p)	DG	C39 H70 O4	DG(36:3p)+H	C	0.943914	1.05458	0.744607	1.24677	1.0827	0.765077	0.906372	0.827669	1.14306	1.02868	0.910421	0.943338	0.857374	0.833614	0.618522	0.901566	0.641177	0.823831	0.747646	1.10888	0.871779	0.832338	0.638066	0.900092	0.653714	0.720503	1.662	1.326	1.35471	1.25083	1.13001	1.31237	1.91736	2.7386	0.833664	0.646481	1.11019	0.984794	0.627068	0.85054	1.04702	0.683961
194	155	6.683	DG(36:3p)	DG	C39 H70 O4	DG(36:3p)+H	C	0.551869	0.509835	0.396364	0.436343	0.411197	0.474039	0.530081	0.489769	0.477034	0.578333	0.716884	0.513186	0.676022	0.698376	0.693926	0.591289	0.65536	0.432146	0.719644	0.608755	1.07577	1.2601	1.43826	0.865638	0.689379	1.23996	1.49095	0.699413	0.895284	0.503365	0.953262	0.882555	1.03575	1.45127	0.915335	1.26345	1.04435	1.32168	0.923755	0.690223	1.33772	0.685327
195	156	7.189	DG(36:3p)	DG	C39 H70 O4	DG(36:3p)+H	C	1.03825	0.686668	1.16769	0.96056	0.88247	1.34196	0.949141	1.18934	0.715474	1.04032	1.21438	0.640855	1.14798	0.943311	1.12481	1.21667	0.845336	1.38722	1.27286	0.889866	1.0672	0.990226	0.861513	0.870975	0.874214	1.29769	1.45264	0.916909	1.15874	1.00675	1.75871	1.45652	1.40585	1.46091	1.37749	1.34441	1.19351	1.29108	1.05708	1.35052	1.6898	1.33782
196	157	7.597	DG(36:3p)	DG	C39 H70 O4	DG(36:3p)+H	C	0.81887	0.038672	0.248733	1.5048	1.17738	0.319598	1.87557	1.9421	0.15989	2.3064	0.740146	0.232278	0.328722	0.407954	0.63426	0.618247	0.512877	0.412902	0.527423	0.391111	0.546153	0.412635	0.682562	0.20587	0.44581	1.70595	2.66269	2.26957	2.30906	1.9481	2.56843	2.52495	0.531455	3.5398	0.370738	2.64081	2.79534	0.414034	2.02137	2.00959	1.71343	1.43907
197	158	8.136	DG(36:3p)	DG	C39 H70 O4	DG(36:3p)+H	C	0.501157	0.571709	0.351861	0.387192	0.23738	0.417005	0.507326	0.464258	0.526309	0.579543	0.869955	0.566012	0.908655	0.833071	0.776006	1.12656	1.08729	1.10334	1.24226	0.966429	0.949659	1.20001	1.44279	0.883166	1.14294	0.661851	0.787652	0.591726	0.75169	0.532523	0.850487	0.594636	0.963877	1.12762	0.730288	0.714462	0.841397	0.786261	0.785953	0.551955	0.5637	1.00362
198	159	9.004	DG(36:3p)	DG	C39 H70 O4	DG(36:3p)+H	C	0.219313	0.118894	0.652334	0.0809821	0.534388	0.640711	0.750755	0.81522	0.948938	0.834478	0.797189	0.865339	0.746141	0.794617	0.730482	0.959788	0.873063	0.733393	0.723276	0.720713	0.903605	1.0194	1.02687	0.87451	0.729868	0.857498	0.973194	0.81178	0.762827	0.54433	0.70917	0.635665	0.740261	0.722523	0.692681	0.679918	0.832316	0.778807	0.74622	0.596105	0.665363	1.79671
199	160	9.169	DG(36:3p)	DG	C39 H70 O4	DG(36:3p)+H	C	0.905114	0.990934	1.00593	0.904878	0.839732	0.87004	0.919389	0.933777	0.843961	0.791469	0.992649	0.903332	1.01278	0.85154	0.9564	1.18447	1.07442	1.03328	1.0739	0.940311	1.13237	1.28847	1.14623	1.07206	1.01808	0.857315	0.920011	0.855433	0.88313	0.798747	1.02254	0.934643	1.06648	0.870487	0.856243	1.18312	0.963325	1.08755	0.867638	1.00539	1.24201	1.00449
200	161	9.409	DG(36:3p)	DG	C39 H70 O4	DG(36:3p)+H	C	0.685691	0.734941	0.53505	0.675195	0.57222	0.671011	0.696249	0.806115	0.761591	0.750551	0.983846	0.917291	0.731526	0.856317	0.834241	1.10686	0.950739	0.84113	0.806079	0.801455	0.976211	1.21018	1.04731	0.957116	0.953338	0.812439	0.942581	0.812629	0.701305	0.672278	0.708615	0.738054	0.737185	1.15658	0.769694	0.997841	0.899499	1.04553	1.11137	0.943771	1.14935	1.08322
201	162	5.121	DG(36:4p)	DG	C39 H68 O4	DG(36:4p)+H	C	0.604604	0.243002	0.780832	0.288834	0.152427	0.610081	0.450592	0.47338	0.362175	0.453355	1.59621	1.07987	1.61806	0.863529	1.09334	0.303991	0.283168	0.213204	0.239871	0.309503	0.224081	0.895089	0.426005	0.405718	0.481938	1.95077	1.44019	0.347697	1.49495	2.39105	0.830797	0.942194	0.508266	0.483773	0.599021	0.970455	0.762894	0.955994	0.778687	0.690821	1.16038	0.351274
202	163	5.411	DG(36:4p)	DG	C39 H68 O4	DG(36:4p)+H	C	0.684751	0.835256	0.751239	0.724898	0.770395	0.902428	0.845908	0.733216	0.800724	0.911237	0.417753	0.912798	1.02409	0.902837	0.824417	0.638254	0.534665	0.853354	0.896806	0.891474	0.635034	0.881973	0.70571	0.732265	0.672377	0.917449	0.701524	1.08017	1.2213	1.01518	0.705074	0.874629	1.06861	1.02061	1.05931	0.975523	0.930542	0.745794	0.627253	0.867437	0.776433	0.768213
203	164	6.295	DG(36:4p)	DG	C39 H68 O4	DG(36:4p)+H	C	0.681233	0.444824	0.529413	0.630648	0.577442	0.601031	0.785768	0.599197	0.631044	0.7256	0.788638	0.631092	0.694954	0.715046	0.544122	0.784278	0.6728	0.680078	0.780543	0.674035	0.926752	0.989876	1.02673	0.820827	0.607624	1.06078	1.15998	0.84767	0.921295	0.865402	0.703836	0.7582	0.997117	0.860251	0.81733	1.09758	0.912543	0.988247	0.891584	0.736373	1.00138	0.774712
204	165	8.949	DG(36:4p)	DG	C39 H68 O4	DG(36:4p)+H	C	0.775561	0.879007	0.701955	0.659887	0.660762	0.68022	0.848556	0.762603	0.767951	0.750737	0.936669	0.582342	1.16393	0.987277	0.854871	1.24853	1.12662	0.903866	0.967149	0.959403	1.02163	1.08538	1.09023	1.07534	1.1482	0.861159	0.925816	0.810338	0.787888	0.675762	0.760475	1.01607	0.972301	0.726742	0.722143	1.11357	0.87667	0.997519	0.599204	0.682652	0.868483	0.7412
205	166	5.008	DG(36:5p)	DG	C39 H66 O4	DG(36:5p)+H	C	0.840142	0.964628	0.698883	1.10943	0.923388	0.719514	0.834424	1.02634	0.814943	0.843308	0.940249	0.848469	0.772703	0.744671	0.647294	0.634467	0.598814	0.544424	0.611072	0.617445	0.44105	0.670843	0.72281	0.367873	0.412508	0.995716	1.09023	0.779822	1.08716	0.676344	0.687534	0.612022	0.893206	1.01062	0.771247	0.739736	0.747728	0.817496	0.652095	0.548638	0.648045	0.4236
206	167	5.907	DG(36:5p)	DG	C39 H66 O4	DG(36:5p)+H	C	0.937779	0.93469	0.831126	0.73445	0.700269	0.790691	0.811022	0.814035	0.737571	0.866542	0.839442	0.730753	0.804937	0.831862	0.770306	0.80532	0.779745	0.718034	0.685977	0.743129	0.881648	0.831742	0.89274	0.759668	0.763616	1.10188	1.25136	0.804775	0.827522	0.788574	0.795342	0.747899	0.953652	0.878433	0.794429	0.937107	0.939031	1.01468	0.810915	0.699524	0.962275	0.799313
207	168	7.185	DG(36:5p)	DG	C39 H66 O4	DG(36:5p)+H	C	0.960872	1.38575	1.33363	1.51418	1.24951	1.18645	0.937304	0.941147	0.978781	1.11204	0.806065	1.29876	1.17872	1.28413	1.03384	1.29206	1.17522	1.27719	1.27042	1.15452	1.23276	1.33991	1.2135	1.13517	1.13983	1.41821	1.41086	1.28464	1.90595	1.31722	1.52994	1.45649	1.44859	1.35614	1.41529	1.31125	1.23814	1.44212	1.22922	1.54715	1.40244	1.79295
208	169	9.561	DG(37:2p)	DG	C40 H74 O4	DG(37:2p)+H	C	0.587131	0.552994	0.480686	0.599095	0.438796	0.46788	0.585808	0.553922	0.413501	0.32041	0.618246	0.434831	0.577098	0.595318	0.59503	0.58059	0.350822	0.537796	0.597067	0.7003	0.345344	0.463822	0.509216	0.368595	0.718104	1.08643	1.15051	1.11851	1.2831	0.984671	1.12049	1.23331	1.02695	1.40203	1.03878	1.20702	1.13893	0.910588	1.29719	0.53183	1.28934	0.905466
209	170	9.31	DG(37:3p)	DG	C40 H72 O4	DG(37:3p)+H	C	0.348373	0.783372	0.484457	0.636474	0.552556	0.691467	0.35284	0.742709	0.581576	0.318583	0.48866	0.189888	0.695543	0.0583938	0.267517	0.147933	0.445643	0.359811	0.327289	0.733316	0.305107	0.117045	0.864335	0.979708	0.81972	1.11261	0.932134	0.928289	0.715571	1.07794	0.190634	0.887254	1.20809	0.767048	0.858737	0.852353	1.11726	1.93575	0.38803	1.17333	0.657714	1.16535
210	171	6.665	DG(37:6p)	DG	C40 H66 O4	DG(37:6p)+Li	C	0.39798	0.44095	0.332502	0.316356	0.31114	0.366912	0.478432	0.4127	0.43555	0.45344	0.667652	0.601862	0.765947	0.744054	0.652968	0.951821	0.843205	0.696057	0.818412	0.76422	1.07066	1.2048	1.21	0.953981	0.972249	1.09381	1.26068	0.858718	1.04488	0.971405	1.13087	1.05662	1.12192	1.5065	1.077	1.23532	1.05563	1.53157	0.919284	0.812939	1.24294	0.814607
211	172	8.333	DG(38:1p)	DG	C41 H78 O4	DG(38:1p)+NH4	C	1.13347	1.01213	1.14808	1.15972	1.09819	1.14059	1.00347	1.09569	1.13839	1.09233	1.07544	1.22028	1.07815	1.06704	1.15213	1.12983	0.972029	1.19466	1.20426	1.02663	1.09422	1.12645	1.10742	1.16619	1.09348	1.08141	1.05098	0.929432	1.0026	1.07082	1.18191	1.16283	1.07303	1.11594	1.04726	0.888772	1.09641	1.00257	1.07405	1.14043	1.08973	1.17112
212	173	9.652	DG(38:2p)	DG	C41 H76 O4	DG(38:2p)+H	C	0.641046	0.697552	0.543284	0.467697	0.497756	0.425887	0.638617	0.724916	0.628952	0.615549	0.840368	0.866211	0.96233	0.772033	0.444917	1.41989	1.10507	1.10956	1.11642	0.98555	1.27557	1.81979	1.54883	1.1949	1.2506	0.60819	0.946979	0.856591	0.740044	0.79052	0.659499	0.856977	0.565501	0.955784	0.827872	1.26171	0.900113	1.16593	0.854337	0.7966	0.851039	0.57309
213	174	7.937	DG(38:2p)	DG	C41 H76 O4	DG(38:2p)+Na	C	1.40016	1.18864	1.26418	4.0236	1.1597	1.37849	1.46716	1.03224	1.33274	1.419	2.25117	1.73131	1.34234	1.7574	1.24655	2.04855	3.65531	1.49497	1.1476	1.34486	1.68682	2.02668	1.04324	1.62288	1.73181	1.52605	1.27873	1.867	1.28197	1.60857	1.91275	2.33729	1.85005	1.3766	1.93378	1.90074	2.56971	2.04601	2.38133	2.10535	2.43521	4.81282
214	175	7.59	DG(38:3p)	DG	C41 H74 O4	DG(38:3p)+NH4	C	0.951755	1.48694	1.05106	1.05446	1.28013	0.961706	0.988018	0.887246	1.37458	1.25134	1.14041	0.968781	1.38523	1.33533	1.38606	1.28993	1.41406	0.900128	1.31476	0.880009	1.02194	1.00798	1.08569	1.01852	0.998341	0.974118	0.788529	1.03207	1.0182	0.953825	1.05331	1.05367	0.909805	0.98595	1.00488	1.33289	1.47563	1.03617	0.969106	0.972945	0.996796	1.04512
215	176	7.578	DG(38:5p)	DG	C41 H70 O4	DG(38:5p)+H	C	1.98046	1.76039	1.82337	1.78632	1.98406	1.70067	1.45112	1.5835	1.51078	1.31403	1.18389	1.82642	1.52542	1.26887	1.40836	1.39921	1.71544	1.7416	1.74889	1.22487	2.13747	1.58011	1.32845	2.24465	1.39612	1.66021	1.62226	1.84581	1.70101	1.72443	2.25372	2.06413	1.65189	1.52342	1.66738	1.72914	1.84593	1.99825	1.78846	1.85877	1.98929	2.69051
216	177	7.16	DG(39:6p)	DG	C42 H70 O4	DG(39:6p)+(CH3CH2)3NH	C	0.277966	0.27184	0.215712	0.281211	0.328352	0.64198	1.79	0.500649	0.57891	0.976229	2.77717	0.79726	0.48759	1.24194	1.0356	0.525528	0.574954	0.236309	0.491681	0.948296	0.426256	0.825729	0.730621	0.621882	0.327434	0.442961	0.313971	0.351566	1.2849	0.373557	0.412996	0.62158	1.09571	0.985812	1.30919	0.610826	0.775154	0.583442	1.82643	0.881678	0.5477	0.326565
217	178	5.492	DG(39:7)	DG	C42 H68 O5	DG(39:7)+Na	C	0.498093	0.764738	0.635166	0.605269	0.423217	0.536636	0.669612	0.695577	0.607325	0.818789	0.800268	0.604708	0.684492	0.623304	0.522363	0.539492	0.469135	0.473126	0.536515	0.595515	0.311337	0.602918	0.809062	0.327162	0.486795	1.42842	1.40175	0.660713	1.13574	1.22475	0.596242	0.592941	1.05066	1.23818	0.672338	0.791775	0.76497	0.702681	0.470538	0.535187	0.62206	0.334501
218	179	5.09	DG(39:8)	DG	C42 H66 O5	DG(39:8)+Na	C	1.3939	1.0911	1.49852	1.0438	0.716723	0.724919	0.758532	0.779833	0.559402	0.894717	1.08077	0.791563	0.835277	0.637041	0.631949	0.359234	0.353423	0.252952	0.299415	0.411509	0.20066	0.336754	0.366562	0.211018	0.242333	1.68023	1.63012	0.609621	1.10304	0.889159	0.478351	0.40141	0.655984	0.76981	0.471584	0.405432	0.555333	0.408013	0.32564	0.471112	0.521954	0.263402
219	180	8.136	DG(40:0)	DG	C43 H84 O5	DG(40:0)+NH4	C	0	0	0	0	0	0	0	0	0	0	0	0.039132	2.53151	1.34821	0	0	0	1.91892	1.69912	0	0.0379874	0.014255	0	0	1.18124	10.089	10.0359	6.97138	7.69097	8.92102	9.29853	12.1114	10.6819	16.9055	12.1158	7.41404	10.311	15.5293	7.95073	5.75578	8.38337	3.41458
220	181	7.257	DG(40:6p)	DG	C43 H72 O4	DG(40:6p)+(CH3CH2)3NH	C	0.299135	0.327267	0.276403	0.35324	0.255877	0.614578	1.46917	0.401551	0.633353	0.939547	2.14384	0.796081	0.692047	1.41066	1.15997	0.744919	0.810041	0.675394	0.801637	1.23166	0.54884	0.999637	0.962384	0.468978	0.706822	0.572657	0.54205	0.501841	0.594634	0.608311	0.523698	0.737653	1.332	1.09987	0.774448	0.78791	1.20152	0.85192	1.01392	1.33001	0.642107	0.498495
221	182	5.336	DG(40:8)	DG	C43 H68 O5	DG(40:8)+Na	C	0.849799	0.600362	0.852975	0.415758	0.290203	0.454959	0.410311	0.336907	0.110409	0.135776	0.427311	0.970426	0.326405	0.448458	0.33479	0	0.07103	0	0.0848547	0	0.114422	0.209975	0	0.125694	0.0744745	4.70386	5.67305	1.11545	1.72788	4.29839	1.39876	1.18707	1.01016	1.0541	1.69693	0.716633	1.04098	1.16141	1.05489	2.00153	0.862017	0.338852
222	183	7.845	DG(41:2p)	DG	C44 H82 O4	DG(41:2p)+Li	C	0.983475	1.45478	1.20608	0.814436	1.03456	0.322696	0.471784	0.319554	0.204183	0.286072	0.230775	0.241957	0.206122	0.135274	0.140448	0.200904	0.103625	0.106985	0.0216146	0.237968	0.0654749	0.108354	0.0626749	0.02367	0.0567338	3.37018	2.5168	1.55179	2.9113	2.32067	1.52571	0.994038	1.42713	1.95337	1.44619	1.15801	1.26344	1.42441	1.13114	0.788326	1.07959	0.747549
223	184	10.124	DG(41:2p)	DG	C44 H82 O4	DG(41:2p)+Li	C	1.514	1.40788	1.41034	1.78975	1.50891	0.403961	0.962258	0.38062	0.745493	0.9022	0.581297	0.53149	0.309049	0.169148	0.737701	0.174737	0.275181	0.0770745	0.184966	0.526865	0	0.130828	0	0.172764	0.353355	0.0311936	0.00507127	1.05612	2.94557	1.49215	1.8533	1.49111	1.88549	0.691376	1.43417	1.66622	0.782374	2.59514	1.16282	0.896499	1.1164	1.08236
224	185	7.244	DG(41:3)	DG	C44 H80 O5	DG(41:3)+NH4	C	1.40758	1.34686	1.44232	1.12917	0.974866	1.15613	1.0079	1.13173	1.10867	1.09899	0.663943	0.923694	0.943376	0.795508	0.770718	0.903078	0.741607	0.660407	0.773149	0.67098	0.847048	0.928482	1.02843	0.764081	0.661582	1.42879	1.42736	0.877342	1.55872	1.41628	1.00975	0.98329	0.980928	1.20706	1.02993	0.92518	0.957312	1.06909	0.653672	0.577271	1.1936	1.02385
225	186	5.164	DG(41:8)	DG	C44 H70 O5	DG(41:8)+Na	C	0.257792	0.0138738	1.33974	0.079995	0.062461	0.183549	0.396942	0.161885	0.163984	0.159891	0.912217	0.616363	1.01873	0.986113	0.519472	0.236702	0.177269	0.127077	0.143995	0.133069	0.110691	0.178617	0.318016	0.0788552	0.204286	5.12246	2.70698	0.235124	2.12349	2.60752	0.804041	0.648147	1.37534	0.722723	0.708517	0.890437	0.964881	0.841512	0.696292	0.570543	1.83213	0.875632
226	187	6.6	DG(42:8)	DG	C45 H72 O5	DG(42:8)+(CH3CH2)3NH	C	0.351019	0.269416	0.238779	0.285107	0.153246	0.630345	1.17004	0.545587	0.867209	2.19837	1.28283	0.410039	0.523245	1.1523	0.963932	0.881022	0.461247	0.408374	0.639649	0.562934	0.365098	0.681253	0.772342	0.260485	0.334208	0.385187	0.433525	0.286101	0.470826	0.427196	0.383688	0.710259	1.48398	0.462141	0.633749	0.772891	0.903464	0.713498	0.661886	0.55685	0.996727	0.714726
227	188	6.903	DG(42:8p)	DG	C45 H72 O4	DG(42:8p)+(CH3CH2)3NH	C	0.436378	0.493939	0.350474	0.398561	0.305275	0.573616	1.18854	0.502487	0.660979	0.950271	1.565	0.630109	0.536099	1.06901	0.970029	0.602237	0.671162	0.54315	0.632204	1.04883	0.372424	0.675986	0.968661	0.447592	0.748384	0.493756	0.49635	0.462338	0.549148	0.533835	0.371594	0.419463	0.970162	0.477812	0.452849	0.932401	1.00519	0.730784	0.643724	0.684128	0.578401	0.427234
228	189	6.017	DG(43:6)	DG	C46 H78 O5	DG(43:6)+H	C	0.408012	0.438662	0.477172	0.385127	0.276263	0.956059	1.48526	1.3189	0.690018	1.1821	1.19138	0.55844	0.752606	1.09783	1.0662	1.12526	0.685003	0.429939	0.50626	0.676546	0.494148	0.858582	1.02703	0.297385	0.51844	0.353389	0.418991	0.137861	0.180283	0.0703927	0.198958	0.282655	0.127968	0.139868	0.0874543	0.194654	0.19085	0.188751	0.11963	0.227983	0.102342	0.16299
229	190	7.157	DG(45:7)	DG	C48 H80 O5	DG(45:7)+(CH3CH2)3NH	C	0.0283334	0.116242	0.0781257	0.0314092	0.00376135	0.282329	0.49572	0.265827	0.231272	0.344278	0.93705	0.361654	0.264111	0.720666	0.640962	0.334788	0.42388	0.232735	0.22218	0.85087	0.300618	0.248522	0.288883	0.16011	0.447914	0.199218	0.202503	0.113014	0.0786701	0.142401	0.0732875	0.169777	0.159586	0.126505	0.0972184	0.140909	0.217681	0.128689	0.183683	0.344499	0.0983553	0.0621861
230	191	7.26	DG(47:8)	DG	C50 H82 O5	DG(47:8)+(CH3CH2)3NH	C	0.224376	0.307037	0.0374131	0.187081	0.057364	0.200291	0.362347	0.474894	0.255575	1.30165	0.954687	0.488003	0.245748	0.496699	0.474725	0.369737	0.384667	0.240364	0.369311	0.542678	0.359289	0.707978	0.332446	0.14837	0.37925	0.447951	0.319457	0.313991	0.283551	0.252866	0.208535	0.38861	0.913059	0.512121	0.247611	0.40794	0.428187	0.477572	0.354819	0.407194	0.425091	0.24262
231	192	8.084	DG(49:6)	DG	C52 H90 O5	DG(49:6)+(CH3CH2)3NH	C	0.141025	0.135477	0.096288	0.150928	0.138159	0.263393	0.558903	0.363082	0.37066	0.532757	1.23642	0.369288	0.453812	0.667143	0.584357	0.487372	0.437472	0.322396	0.417179	0.609999	0.328181	0.448469	0.546267	0.245114	0.411409	0.181694	0.148862	0.112869	0.0845691	0.121038	0.0705417	0.0999503	0.176306	0.130909	0.0987073	0.0889021	0.129769	0.0849416	0.0895134	0.142463	0.0840261	0.0574694
232	193	7.796	DG(49:7)	DG	C52 H88 O5	DG(49:7)+(CH3CH2)3NH	C	0.149764	0.141941	0.109496	0.144637	0.128755	0.235834	0.480744	0.358336	0.339806	0.458744	1.07679	0.368721	0.361114	0.583308	0.526805	0.45302	0.452475	0.244943	0.34904	0.540809	0.266563	0.415285	0.525897	0.203694	0.329401	0.214227	0.178419	0.105381	0.0944433	0.125289	0.0740827	0.132317	0.24238	0.148139	0.112775	0.157809	0.214736	0.112109	0.120655	0.176849	0.109734	0.0818469
233	194	7.514	DG(49:8)	DG	C52 H86 O5	DG(49:8)+(CH3CH2)3NH	C	0.133193	0.124939	0.104283	0.136283	0.102809	0.251711	0.487398	0.351748	0.313318	0.559693	1.12632	0.37677	0.384625	0.701026	0.563974	0.447967	0.455665	0.22106	0.296493	0.577618	0.274464	0.355661	0.452451	0.189665	0.297796	0.284038	0.21881	0.100548	0.117108	0.155836	0.0826587	0.151614	0.334279	0.140186	0.158174	0.135245	0.228427	0.144447	0.124188	0.182089	0.116888	0.0850912
234	195	7.257	DG(49:9)	DG	C52 H84 O5	DG(49:9)+(CH3CH2)3NH	C	0.168355	0.14651	0.112472	0.127615	0.111344	0.287843	0.536015	0.386796	0.390057	0.721625	0.968771	0.357841	0.332029	0.639823	0.568917	0.340339	0.382223	0.166735	0.238914	0.537617	0.209185	0.346556	0.422671	0.151865	0.220231	0.493089	0.377583	0.133265	0.220591	0.270798	0.173582	0.221624	0.457656	0.270898	0.18457	0.212746	0.317151	0.211982	0.231268	0.206049	0.240132	0.144138
235	196	8.362	DG(51:6)	DG	C54 H94 O5	DG(51:6)+(CH3CH2)3NH	C	0.149192	0.13527	0.100872	0.145632	0.145351	0.278599	0.474876	0.345083	0.363719	0.498993	1.30495	0.433918	0.481812	0.674506	0.619798	0.564207	0.485997	0.361809	0.460048	0.65018	0.379279	0.538554	0.625487	0.291571	0.436904	0.139057	0.147646	0.134592	0.062065	0.0944549	0.0519813	0.0853332	0.120106	0.124518	0.0868152	0.07327	0.11425	0.0842074	0.111617	0.164321	0.0833582	0.0620823
236	197	8.12	DG(51:7)	DG	C54 H92 O5	DG(51:7)+(CH3CH2)3NH	C	0.152866	0.162937	0.112064	0.152615	0.143391	0.275982	0.496063	0.380596	0.366187	0.567267	1.07022	0.417985	0.395149	0.676516	0.553777	0.455248	0.488131	0.277796	0.349014	0.623237	0.300638	0.450803	0.524924	0.214851	0.360551	0.1926	0.18377	0.113845	0.0902798	0.116509	0.0712197	0.108334	0.223282	0.206358	0.0833931	0.102017	0.197471	0.147113	0.164551	0.195916	0.135697	0.0940798
237	198	7.82	DG(51:8)	DG	C54 H90 O5	DG(51:8)+(CH3CH2)3NH	C	0.202298	0.167153	0.14228	0.172662	0.129743	0.362299	0.612364	0.40074	0.426354	0.727569	1.04032	0.385284	0.401301	0.688422	0.546774	0.465955	0.477222	0.259889	0.327601	0.582985	0.284518	0.421791	0.556187	0.226696	0.328123	0.303751	0.249101	0.119717	0.145587	0.141468	0.0883006	0.125476	0.317204	0.145629	0.125151	0.113603	0.196942	0.132184	0.127172	0.158498	0.127245	0.0863088
238	199	7.604	DG(51:9)	DG	C54 H88 O5	DG(51:9)+(CH3CH2)3NH	C	0.202973	0.175504	0.150465	0.154467	0.128787	0.324309	0.632045	0.433309	0.436212	0.812904	1.13002	0.375176	0.371014	0.616438	0.574697	0.368163	0.471342	0.201363	0.276238	0.566455	0.241392	0.317795	0.443462	0.178013	0.247799	0.288287	0.258951	0.101502	0.132157	0.15831	0.0821186	0.124924	0.275909	0.121631	0.113642	0.119691	0.2034	0.11239	0.112737	0.11018	0.10385	0.0803266
239	200	8.624	DG(53:6)	DG	C56 H98 O5	DG(53:6)+(CH3CH2)3NH	C	0.103363	0.136716	0.0277158	0.0695303	0.0672815	0.231595	0.38958	0.255905	0.350976	0.481119	1.43459	0.346216	0.401903	0.619076	0.599748	0.554004	0.508006	0.30503	0.547044	0.555761	0.344812	0.461965	0.480187	0.236446	0.384487	0.165853	0.149015	0.127364	0.0106774	0.0962353	0.0261957	0.0239728	0.0628275	0.0697789	0.0339049	0.0415658	0.0174186	0.0353287	0.0809513	0.163188	0.0406682	0.117428
240	201	8.41	DG(53:7)	DG	C56 H96 O5	DG(53:7)+(CH3CH2)3NH	C	0.175828	0.130281	0.0978504	0.151036	0.114922	0.21997	0.402385	0.292486	0.267334	0.444439	1.17656	0.466529	0.358759	0.570482	0.548875	0.538579	0.414138	0.290467	0.333469	0.58234	0.296261	0.377797	0.469953	0.249591	0.369893	0.298578	0.130323	0.097504	0.0840864	0.124667	0.07868	0.0740571	0.153051	0.141033	0.0930082	0.0865203	0.160123	0.0852019	0.112781	0.156462	0.145285	0.0590309
241	202	8.19	DG(53:8)	DG	C56 H94 O5	DG(53:8)+(CH3CH2)3NH	C	0.199985	0.191679	0.122405	0.12374	0.110879	0.419359	0.750528	0.382282	0.492608	0.863913	1.29243	0.311298	0.480074	0.537764	0.679011	0.446105	0.422216	0.28129	0.367166	0.627769	0.249673	0.330853	0.447008	0.201928	0.256067	0.327214	0.260889	0.137547	0.147147	0.254923	0.136976	0.139845	0.321679	0.190713	0.141527	0.120114	0.232058	0.118391	0.131267	0.192665	0.10587	0.11455
242	203	7.918	DG(53:9)	DG	C56 H92 O5	DG(53:9)+(CH3CH2)3NH	C	0.265601	0.223625	0.170202	0.171821	0.165919	0.414101	0.674529	0.491469	0.485932	0.913402	0.899477	0.40603	0.353319	0.652286	0.549669	0.354938	0.37981	0.230619	0.243678	0.478014	0.192756	0.301187	0.239351	0.182035	0.281832	0.46587	0.360322	0.101746	0.211822	0.249262	0.0688798	0.120094	0.340361	0.154602	0.141215	0.0833975	0.180339	0.127632	0.118682	0.147341	0.0929755	0.0804977
243	204	8.884	DG(55:6)	DG	C58 H102 O5	DG(55:6)+(CH3CH2)3NH	C	0.0576163	0.107981	0.0313284	0.139033	0.253468	0.257173	0.503272	0.515229	0.453392	0.512464	0.619762	0.440755	0.448132	0.563484	0.509199	0.292122	0.401082	0.216338	0.349827	0.476827	0.355685	0.333585	0.510582	0.170174	0.359003	0.152858	0.0856967	0.118056	0.0387087	0.0979787	0.0750583	0.125513	0.0748174	0	0.10068	0	0.166705	0	0.0320863	0.193662	0.044105	0.034815
244	205	8.659	DG(55:7)	DG	C58 H100 O5	DG(55:7)+(CH3CH2)3NH	C	0.242188	0.154985	0.128863	0.204108	0.233591	0.272865	0.830022	0.377962	0.626242	0.662262	1.0657	0.32299	0.316835	0.519474	0.552691	0.515108	0.510468	0.176883	0.244955	0.389202	0.232097	0.32101	0.293541	0.135715	0.267372	0.385393	0.29935	0.11079	0.121991	0.161138	0.114466	0.164308	0.229634	0.143104	0.0944043	0.103988	0.23431	0.109174	0.113302	0.252806	0.0854129	0.104716
245	206	8.239	DG(55:9)	DG	C58 H96 O5	DG(55:9)+(CH3CH2)3NH	C	0.0347372	0.0692686	0.122337	0.0614526	0.0554675	0.49513	0.745429	0.622383	0.606605	1.04872	1.00297	0.394118	0.193686	0.64437	0.464188	0.325522	0.239488	0.0528828	0.224201	0.334451	0.200471	0.0639959	0.265053	0.0649029	0.13017	0.623971	0.496295	0.130702	0.247074	0.31141	0.128118	0.190249	0.448933	0.181793	0.180658	0.150439	0.254626	0.165637	0.167996	0.178332	0.123316	0.12151
246	207	8.883	DG(57:7)	DG	C60 H104 O5	DG(57:7)+(CH3CH2)3NH	C	0.276536	0.223522	0.157162	0.302109	0.232503	0.309632	0.737905	0.388582	0.45989	0.9204	0.11261	0.434335	0.36218	0.568987	0.66007	0.321156	0.374051	0.12517	0.385524	0.505691	0.290784	0.278351	0.391605	0.174397	0.292244	0.368072	0.154019	0.0696952	0.101636	0.207064	0.0908037	0.156285	0.48996	0.139727	0.1086	0.0247994	0.166463	0.0782461	0.126372	0.167512	0.0838877	0.106652
247	208	3.768	DG(8:0/12:0)	DG	C23 H44 O5	DG(8:0/12:0)+Na	B	1.47812	1.18488	1.22285	1.33943	1.12048	1.39174	1.28574	1.20583	1.17322	0.984918	1.19565	1.45018	1.38381	0.937916	1.29765	1.4268	1.36536	1.47018	1.48842	1.30075	1.3508	1.28761	1.0073	1.26172	0.98099	1.06222	1.01491	1.24466	1.18566	0.923669	1.57054	1.84817	1.56229	1.29889	1.46874	1.38535	1.53812	1.4771	1.48338	1.37443	1.44326	1.33067
248	209	4.065	DG(8:0/18:1)	DG	C29 H54 O5	DG(8:0/18:1)+Na	B	1.40461	1.42028	0.930493	1.28381	1.44206	1.38561	0.819918	1.27943	1.05726	1.11566	1.23088	1.22493	1.45666	1.48129	1.44569	1.2255	1.51574	1.61707	1.17828	1.47961	1.17212	1.50418	1.31275	1.31037	1.28962	1.29059	1.0561	1.55514	1.40047	1.45748	1.63164	1.40987	0.873384	1.49303	1.18112	1.27672	1.23978	1.15216	1.61398	1.62233	1.2793	1.2261
249	210	2.933	DG(8:0/8:0)	DG	C19 H36 O5	DG(8:0/8:0)+K	B	0.357348	0.193726	0.132921	0.243859	0.241273	1.33617	2.75947	2.50056	2.28645	1.78573	2.5566	1.77888	2.25569	2.81114	3.15697	2.54999	2.13685	1.26109	1.72757	2.41486	1.79167	2.8431	2.48226	1.23033	1.85381	0.366016	0.434413	0.513238	0.488669	0.310257	0.613336	1.06652	1.08741	1.50094	1.14384	1.25204	1.36489	1.5658	0.865013	0.673224	1.28316	0.573529
250	211	1.05	LPC(14:0)	LPC	C22 H46 O7 N1 P1	LPC(14:0)+H	B	2.01646	2.88273	2.51639	1.83524	1.42901	0.437409	1.12637	1.22787	1.22933	1.17782	0.577295	0.600451	0.627819	0.424282	0.458909	0.504698	0.40385	0.439689	0.456014	0.35357	0.121161	0.255904	0.470584	0.173993	0.186647	1.80606	3.38055	1.14195	2.01049	2.14012	1.52157	1.18134	0.852501	1.73821	0.708455	0.75216	0.499082	0.991295	0.786082	1.04569	0.449236	0.37987
251	212	1.759	LPC(14:0)	LPC	C22 H46 O7 N1 P1	LPC(14:0)+H	B	1.70358	2.44712	2.32669	1.55779	1.43986	0.348471	0.876893	1.30572	0.937081	1.21285	0.370948	0.460193	0.438458	0.39122	0.290634	0.411546	0.363001	0.321622	0.287435	0.318933	0.0640554	0.229685	0.406634	0.0393273	0.109478	2.02387	3.32656	0.678813	1.47007	2.18767	0.884579	0.774623	0.634643	2.09354	0.778405	0.578317	0.370525	0.71382	0.449255	0.93494	0.332918	0.287456
252	213	1.092	LPC(15:0)	LPC	C23 H48 O7 N1 P1	LPC(15:0)+H	B	2.32798	2.53245	2.95294	1.97081	1.12746	0.664218	1.60964	1.64687	1.13992	1.25615	0.716442	0.550871	0.538826	0.549545	0.54228	0.468643	0.375541	0.340636	0.404548	0.422703	0.354689	0.372536	0.5883	0.380676	0.261241	2.3786	3.07718	0.847844	1.52896	2.23045	0.472483	0.51772	0.41778	0.151807	0.481028	0.434547	0.326461	0.381935	0.309771	0.405797	0.282732	0.219508
253	214	2.197	LPC(15:1)	LPC	C23 H46 O7 N1 P1	LPC(15:1)+H	B	0.851977	0.907065	0.882034	0.769333	0.769976	0.137981	1.04311	0.343642	0.274912	0.28168	0.447371	0.331488	0.603424	0.410017	0.400794	0.428486	0.210373	0.210271	0.359069	0.565161	0.182553	0.918567	0.982439	0.252994	0.484253	0.763224	0.534123	0.228894	0.507161	0.391707	0.169165	0.147803	0.236663	0.373369	0.182923	0.395212	0.379237	0.249401	0.373523	0.246528	0.181588	0.103033
254	215	2.148	LPC(16:0)	LPC	C24 H50 O7 N1 P1	LPC(16:0)+H	B	2.50962	2.40647	3.18115	2.33823	1.79807	0.690143	1.30909	1.1057	0.988575	1.4147	0.728611	0.59925	0.59454	0.602743	0.614063	0.363834	0.314635	0.229457	0.235865	0.366336	0.127352	0.216514	0.434772	0.12156	0.164592	2.26007	2.45952	0.486933	1.22935	1.53088	0.447326	0.34215	0.392073	0.541619	0.410591	0.283086	0.293488	0.355391	0.254745	0.315441	0.238583	0.178039
255	216	2.517	LPC(16:0)	LPC	C24 H50 O7 N1 P1	LPC(16:0)+H	B	2.53155	2.34692	3.20504	2.23161	1.42061	0.810684	1.19937	1.0558	1.18512	1.50601	0.559858	0.56515	0.583196	0.500399	0.497789	0.331738	0.286279	0.215306	0.229122	0.299542	0.113056	0.211893	0.414215	0.122851	0.165401	1.89636	2.87607	0.482687	1.27721	1.72975	0.399354	0.388754	0.46298	1.21817	0.396028	0.294665	0.262434	0.353244	0.235318	0.359976	0.224744	0.178213
256	217	1.057	LPC(16:1)	LPC	C24 H48 O7 N1 P1	LPC(16:1)+H	B	0.902368	1.0591	1.20795	1.06634	0.702074	0.388267	1.12782	1.61797	1.28547	1.10248	0.755754	0.858597	0.775218	0.52453	0.578877	0.642956	0.629111	0.706264	0.824589	0.788067	0.217775	0.528376	1.11577	0.234195	0.244306	0.967601	1.5013	0.978281	1.39751	1.58197	1.40106	1.13289	1.01252	2.01984	1.00445	0.807032	0.646254	0.988692	0.719214	0.920314	0.452899	0.439806
257	218	1.899	LPC(16:1)	LPC	C24 H48 O7 N1 P1	LPC(16:1)+H	B	0.949298	0.870417	1.12759	0.932136	0.662718	0.326646	1.05506	1.35827	1.26595	1.37749	0.745805	0.692711	0.72248	0.607973	0.628883	0.651293	0.618279	0.582652	0.753759	0.853563	0.159145	0.520832	1.144	0.169139	0.237022	0.938179	1.51599	0.678809	1.07812	1.38904	0.925409	0.799852	0.712224	2.62767	0.870511	0.604882	0.484926	0.690896	0.486722	0.682239	0.288897	0.26592
258	219	2.859	LPC(17:0)	LPC	C25 H52 O7 N1 P1	LPC(17:0)+H	B	0.653469	1.11735	0.571121	0.460412	0.349668	0.742028	1.07907	0.820569	0.801518	0.435374	0.681527	0.49306	0.587399	0.670614	0.313198	0.542805	0.502467	0.389496	0.461402	0.536342	0.383071	0.474087	0.638897	0.360527	0.374239	1.80194	3.74377	0.32795	1.38791	1.79379	0.502347	0.564378	0.637961	0.761262	0.527816	0.586376	0.484662	0.553845	0.486373	0.587449	0.518433	0.398578
259	220	2.298	LPC(17:1)	LPC	C25 H50 O7 N1 P1	LPC(17:1)+H	B	0.61037	0.66238	0.890985	0.656959	0.514847	0.199678	0.955863	0.45516	1.37768	1.13896	0.858216	0.846933	0.832424	0.764186	0.846574	0.540288	0.541003	0.534295	0.633165	0.743663	0.344542	0.631652	1.19627	0.568759	0.315284	1.11251	1.03741	0.451743	1.32642	1.52951	0.190733	0.214452	0.312248	1.40113	0.353856	0.26082	0.194644	0.215246	0.348512	0.469005	0.341244	0.174819
260	221	3.13	LPC(18:0)	LPC	C26 H54 O7 N1 P1	LPC(18:0)+H	B	1.3595	1.0862	1.46136	0.861861	0.597905	0.902667	1.08519	1.0238	1.03428	1.23815	0.851195	0.902464	1.07229	0.938265	0.954667	1.13668	0.825517	0.531724	0.523469	0.627863	0.153706	0.377804	0.532734	0.1071	0.20287	1.78013	3.03783	0.345304	0.875043	1.24335	0.560546	0.589537	0.479069	0.775391	0.451062	0.363583	0.413188	0.488245	0.367233	0.493592	0.383934	0.262187
261	222	2.636	LPC(18:1)	LPC	C26 H52 O7 N1 P1	LPC(18:1)+H	B	0.450844	0.639238	0.85507	0.563892	0.379675	0.493397	1.0364	1.06079	0.956118	1.16418	0.852935	0.697464	0.899374	0.467789	0.454718	0.932689	0.802756	0.817082	0.844052	0.736367	0.284087	0.74282	1.61726	0.343441	0.421643	1.00061	1.27373	0.45728	0.933236	1.08821	0.447063	0.389094	0.635731	0.923983	0.483207	0.623872	0.544343	0.757936	0.432435	0.449788	0.409062	0.260346
262	223	1.099	LPC(18:2)	LPC	C26 H50 O7 N1 P1	LPC(18:2)+H	B	1.53093	1.75821	1.69296	1.6567	1.22699	0.589827	1.48612	1.72454	1.14678	1.41549	1.02675	0.90461	0.821271	0.629658	0.610293	0.474899	0.408007	0.501311	0.595408	0.708941	0.149897	0.448065	0.780056	0.194663	0.206884	0.814537	0.991578	0.697051	1.01066	0.99962	0.405169	0.348421	0.445695	0.163621	0.371231	0.511011	0.515143	0.575228	0.405353	0.298517	0.234097	0.188903
263	224	2.096	LPC(18:2)	LPC	C26 H50 O7 N1 P1	LPC(18:2)+H	B	1.3549	1.41491	1.69398	1.49486	1.12845	0.451402	1.14074	1.52397	1.22921	1.64438	0.848667	0.898768	0.69612	0.621275	0.59516	0.39907	0.403792	0.383409	0.497056	0.727349	0.111407	0.427421	0.815605	0.161646	0.172581	0.873499	0.905294	0.497757	0.930725	1.08901	0.295553	0.281602	0.388325	0.753706	0.323655	0.500018	0.40994	0.427096	0.345029	0.249325	0.185925	0.138302
264	225	2.547	LPC(18:3)	LPC	C26 H48 O7 N1 P1	LPC(18:3)+H	B	3.96279	3.37562	5.22686	2.54829	1.67379	0.724283	1.44402	1.19647	1.33007	1.53598	0.625589	0.614551	0.638426	0.525472	0.514061	0.346559	0.314945	0.214893	0.24374	0.294633	0.0921973	0.214196	0.449512	0.106891	0.139217	2.04274	3.75166	0.517564	1.36134	1.90351	0.362506	0.36465	0.482238	0.785131	0.334234	0.304285	0.254077	0.290496	0.210613	0.312134	0.215795	0.145686
265	226	3.375	LPC(19:0)	LPC	C27 H56 O7 N1 P1	LPC(19:0)+H	B	0.883127	0.581837	1.17832	0.620256	0.430626	0.564704	0.705808	0.472794	0.443003	0.706952	0.447343	0.362146	0.402939	0.426075	0.501633	0.420432	0.277407	0.190055	0.212959	0.333733	0.130504	0.238801	0.32761	0.110422	0.105099	4.9168	8.46843	0.664745	1.70606	2.61037	0.610895	0.712929	0.547821	1.19698	0.495789	0.435744	0.427315	0.601327	0.451614	0.582259	0.573109	0.459086
266	227	2.908	LPC(19:1)	LPC	C27 H54 O7 N1 P1	LPC(19:1)+H	B	1.45946	1.56568	1.74676	1.29386	0.975396	0.647802	1.01639	1.07049	0.865819	1.12455	0.655143	0.448318	0.567534	0.421127	0.371949	0.416303	0.36083	0.304439	0.32313	0.367933	0.166634	0.614052	0.96568	0.211733	0.269623	1.05197	1.50348	0.449015	0.803041	0.970867	0.303611	0.300519	0.42535	0.539541	0.31198	0.43446	0.386125	0.457224	0.307159	0.255449	0.302757	0.187704
267	228	2.742	LPC(19:3)	LPC	C27 H50 O7 N1 P1	LPC(19:3)+H	B	2.02227	3.05228	2.00598	0.931164	0.829012	0.571964	2.173	1.69702	0.798834	0.87855	1.27536	0.491478	0.528468	0.575143	0.515069	0.447978	0.47079	0.214543	0.452226	0.39594	0.514954	0.299512	0.476353	0.280906	0.660542	4.18938	5.98048	0.776893	1.9393	2.32202	0.454022	0.581389	0.496884	1.49549	0.279854	0.47591	0.537301	0.513336	0.335264	1.02783	0.483291	0.928055
268	229	3.617	LPC(20:0)	LPC	C28 H58 O7 N1 P1	LPC(20:0)+H	B	0.479162	0.344399	0.506314	0.279577	0.187852	0.613555	0.722091	0.715861	0.853393	0.919435	0.738353	0.60399	0.720297	0.821134	0.723787	0.767791	0.55145	0.367835	0.355466	0.413185	0.154447	0.396526	0.593129	0.106693	0.206472	1.21235	2.30195	0.145969	0.568608	0.871731	0.328983	0.317922	0.335391	0.537205	0.264091	0.2494	0.268374	0.291975	0.265632	0.282893	0.371092	0.206594
269	230	3.186	LPC(20:1)	LPC	C28 H56 O7 N1 P1	LPC(20:1)+H	B	2.28559	1.91007	2.47302	1.69399	1.17701	0.708113	1.05536	0.927247	0.919417	1.12086	0.542746	0.411961	0.498275	0.432501	0.454703	0.496401	0.379283	0.249828	0.320896	0.354055	0.132678	0.266864	0.548638	0.100572	0.153859	1.10797	1.31536	0.304015	0.733233	0.863786	0.23256	0.277574	0.306062	0.363627	0.271435	0.338287	0.262901	0.350846	0.201123	0.236024	0.259019	0.180521
270	231	2.644	LPC(20:2)	LPC	C28 H54 O7 N1 P1	LPC(20:2)+H	B	1.49382	2.28115	1.54961	2.19255	1.41886	1.20559	0.679532	0.758284	1.5664	1.85265	0.36775	0.367794	0.713386	0.311462	0.625704	0.49046	0.454485	0.397939	0.173207	0.705825	0.0497689	0.117719	0.533922	0.0571229	0.204519	1.05626	0.480101	0.176113	0.297894	1.09796	0.178865	0.0971869	0.193265	0.573325	0.330726	0.313946	0.268743	0.395519	0.0925955	0.337222	0.104463	0.062881
271	232	3.134	LPC(20:3)	LPC	C28 H52 O7 N1 P1	LPC(20:3)+H	B	3.33825	1.84959	3.39606	1.51968	0.927725	1.33332	1.44868	1.09715	1.21617	1.26143	0.973611	1.0878	1.30834	1.06923	1.15665	1.33794	1.05584	0.621474	0.658059	0.649954	0.196116	0.479279	0.579378	0.116737	0.226996	2.35778	4.32444	0.419084	0.986539	1.59466	0.713235	0.711182	0.573077	1.00105	0.544138	0.477604	0.46442	0.572405	0.451456	0.586606	0.435944	0.275922
272	233	2.65	LPC(20:4)	LPC	C28 H50 O7 N1 P1	LPC(20:4)+H	B	0.871889	0.909056	1.26222	0.847491	0.48242	0.528401	1.16677	1.11176	1.16142	1.21927	0.887594	0.689384	0.943689	0.718576	0.687759	1.01133	0.868026	0.864302	0.936018	1.03084	0.241986	0.750404	1.91904	0.330119	0.293158	1.21144	1.78439	0.423405	0.901871	1.37078	0.309252	0.456532	0.650783	1.06636	0.461757	0.778906	0.480244	0.781095	0.440087	0.512522	0.396987	0.260156
273	234	1.119	LPC(20:5)	LPC	C28 H48 O7 N1 P1	LPC(20:5)+H	B	2.38606	2.2066	2.70563	2.36534	1.58522	0.579743	1.15139	1.49827	1.24859	2.37723	0.874746	0.810141	0.687702	0.604667	0.63132	0.399328	0.401025	0.322072	0.528562	0.654747	0.105741	0.213076	0.672248	0.178519	0.220293	1.09379	1.48559	0.597648	1.31308	0.937597	0.420736	0.314583	0.346418	0.12092	0.328341	0.346512	0.249682	0.374814	0.325503	0.231318	0.222736	0.198805
274	235	2.131	LPC(20:5)	LPC	C28 H48 O7 N1 P1	LPC(20:5)+H	B	2.13973	1.99934	2.92376	2.12317	1.32016	0.429768	1.29298	1.69666	1.17182	1.5321	0.807968	0.731764	0.622532	0.514065	0.523208	0.294245	0.316401	0.280754	0.418278	0.688274	0.0783236	0.242315	0.606444	0.0994078	0.11659	1.03877	1.36849	0.374575	0.911324	1.04548	0.210485	0.184742	0.241586	0.641569	0.240348	0.307989	0.216237	0.289339	0.183716	0.172663	0.116232	0.0814775
275	236	3.403	LPC(21:3)	LPC	C29 H54 O7 N1 P1	LPC(21:3)+H	B	1.23268	0.555336	1.05661	0.786869	0.489232	0.412487	0.751379	0.488372	0.406352	0.77425	0.321733	0.336181	0.404934	0.385297	0.165395	0.30202	0.375406	0.1512	0.214415	0.188363	0.0561619	0.0617294	0.180805	0.0612814	0.00514497	4.92539	10.8317	1.4261	2.97268	3.45956	0.90625	1.14748	0.859072	1.74299	0.700119	0.930634	0.8255	0.855036	0.624288	1.04652	1.00493	0.644639
276	237	4.069	LPC(22:0)	LPC	C30 H62 O7 N1 P1	LPC(22:0)+H	B	1.5445	1.03323	1.46476	0.818219	0.586068	1.03078	1.06014	0.791616	1.11037	1.03688	0.553846	0.644736	0.569545	0.673148	0.609885	0.6429	0.471868	0.259773	0.293115	0.279894	0.171117	0.387323	0.601148	0.117372	0.239308	2.50677	4.79645	0.267312	1.24449	1.57422	0.38011	0.40938	0.333339	0.776753	0.320872	0.307407	0.274915	0.30168	0.216758	0.239514	0.420107	0.211265
277	238	3.604	LPC(22:3)	LPC	C30 H56 O7 N1 P1	LPC(22:3)+H	B	0.831544	0.337514	0.880597	0.434391	0.2625	0.954901	1.12922	0.896228	1.23111	1.31096	0.724406	0.763801	0.849454	1.02724	0.931088	0.846098	0.666474	0.474262	0.468254	0.403681	0.188178	0.456749	0.712291	0.079684	0.257944	2.32821	4.82413	0.156621	0.723984	1.32944	0.446337	0.364916	0.411126	0.711885	0.321469	0.324529	0.399858	0.423463	0.293396	0.393747	0.50496	0.213016
278	239	3.182	LPC(22:4)	LPC	C30 H54 O7 N1 P1	LPC(22:4)+H	B	4.77561	2.90395	6.671	2.64288	1.5842	0.975481	1.19983	0.928179	1.14483	1.15166	0.503865	0.269582	0.543141	0.461093	0.497061	0.344295	0.432977	0.258957	0.347664	0.444677	0.100451	0.316519	0.533213	0.152421	0.225746	1.44791	2.21254	0.33778	0.799543	1.13414	0.304254	0.264256	0.403304	0.384824	0.251332	0.339708	0.343891	0.2838	0.22626	0.231955	0.283924	0.150731
279	240	2.649	LPC(22:5)	LPC	C30 H52 O7 N1 P1	LPC(22:5)+H	B	1.99904	1.92187	2.35645	1.9471	1.19544	0.728743	4.1615	1.47235	1.37993	1.17785	0.583849	0.567119	0.527951	0.807095	0.898706	0.248154	0.419816	0.410028	0.380399	0.468468	0.00737161	0.0549998	0.409949	0.0126473	0.0212805	0.941441	1.58578	0.449284	0.913664	0.994408	0.357354	0.280442	0.351144	0.995421	0.194989	0.553921	0.295012	0.706397	0.0971425	0.30197	0.441057	0.0473723
280	241	4.564	LPC(24:0)	LPC	C32 H66 O7 N1 P1	LPC(24:0)+H	B	1.35015	0.769392	1.40002	0.594105	0.288552	1.37364	1.19503	0.928052	1.08284	1.17199	0.680815	0.58421	0.611926	0.619079	0.601207	0.484687	0.393332	0.228405	0.302131	0.270987	0.168593	0.37264	0.584059	0.181838	0.233262	2.25082	3.61268	0.320609	1.12614	1.13054	0.260231	0.228583	0.285339	0.46495	0.275603	0.22654	0.245146	0.228136	0.17987	0.15322	0.227156	0.134001
281	242	5.058	LPC(26:0)	LPC	C34 H70 O7 N1 P1	LPC(26:0)+H	B	1.77404	0.858651	1.63743	0.930461	0.588789	2.01572	1.52194	0.646695	1.49991	1.17251	0.795655	0.931399	0.643964	0.973304	0.670322	0.521676	0.423939	0.248974	0.248705	0.373415	0.223473	0.928419	0.957168	0.274379	0.411597	2.14318	3.12148	0.271771	0.967058	0.987424	0.20367	0.132114	0.297328	0.220138	0.223634	0.282956	0.320699	0.0584365	0.14274	0.156149	0.288765	0.142096
282	243	2.578	LPE(16:0)	LPE	C21 H44 O7 N1 P1	LPE(16:0)+Na	B	2.18731	1.26887	2.73105	1.2279	0.702503	1.46874	1.35861	1.39217	1.59308	1.63502	1.03745	0.947633	1.03524	1.01473	0.964063	0.747152	0.647744	0.460216	0.512588	0.486629	0.307764	0.615412	0.878779	0.370709	0.486131	1.73504	2.58923	0.32296	0.968611	1.42005	0.341419	0.309267	0.425307	0.610743	0.326391	0.271936	0.266327	0.277417	0.204615	0.298828	0.228073	0.154959
283	244	2.933	LPE(17:0)	LPE	C22 H46 O7 N1 P1	LPE(17:0)+Na	B	3.37154	1.45023	3.85516	1.67581	0.781474	1.65831	0.998781	0.942415	0.972249	2.31795	0.119024	0.40714	0.630975	0.269143	0.205967	0.172448	0.115727	0.147235	0.0193159	0.0410506	0.0319491	0.127204	0.176873	0.086458	0	4.79967	7.4602	0.519534	1.76855	2.967	0.358878	0.484232	0.21443	0.69126	0.332232	0.172423	0.0714682	0.349978	0.0708726	0.215012	0.187248	0.0810059
284	245	2.61	LPE(18:1)	LPE	C23 H46 O7 N1 P1	LPE(18:1)+H	B	0.620475	0.44785	0.523186	0.460233	0.298344	0.271104	0.396684	0.325266	0.403333	0.607189	0.7207	0.541931	0.755408	0.586351	0.437604	0.441407	0.574735	0.380367	0.342271	0.58837	0.21924	0.908637	1.10594	0.435204	0.572068	0.671478	0.796522	0.217061	0.583915	0.6787	0.283839	0.212362	0.482731	0.507158	0.285941	0.540764	0.548726	0.392235	0.405164	0.43741	0.301612	0.157825
285	246	1.068	LPE(18:2)	LPE	C23 H44 O7 N1 P1	LPE(18:2)+H	B	1.40248	1.1712	1.2684	1.04626	0.865131	0.375166	0.658184	0.679073	0.563535	0.597865	0.718799	0.587086	0.605782	0.493297	0.424837	0.289348	0.271846	0.260413	0.307045	0.364939	0.116719	0.35987	0.466705	0.162677	0.164538	0.60758	0.624376	0.276766	0.520008	0.605514	0.245986	0.219294	0.259165	0.0881704	0.198266	0.313151	0.321915	0.333008	0.260181	0.245825	0.186411	0.132353
286	247	2.074	LPE(18:2)	LPE	C23 H44 O7 N1 P1	LPE(18:2)+H	B	1.40737	1.14248	1.26382	1.05109	0.827149	0.405948	0.646622	0.73645	0.641667	0.730397	0.672565	0.585239	0.591411	0.498692	0.502583	0.341475	0.265457	0.246023	0.28993	0.443472	0.12663	0.369253	0.481045	0.202672	0.207956	0.717139	0.722125	0.244361	0.496609	0.698298	0.236443	0.236438	0.263588	0.429132	0.222772	0.339629	0.290067	0.295331	0.25019	0.255645	0.212677	0.112857
287	248	1.976	MG(18:3)	MG	C21 H36 O4	MG(18:3)+H	C	1.02852	0.592367	1.27296	0.764599	0.475585	0.825388	0.830433	0.839776	0.873122	0.994121	1.25421	0.907555	0.798057	0.889417	1.02143	1.11602	0.786865	0.64921	0.804742	0.77004	0.899261	1.3517	1.13306	0.938209	1.05824	0.84133	0.862555	0.510805	0.613738	0.866891	0.949227	0.690852	0.55723	0.785288	0.700009	0.864413	0.899928	0.843285	0.687861	0.725476	0.741609	0.543928
288	249	2.713	MG(18:3)	MG	C21 H36 O4	MG(18:3)+H	B	1.06243	1.26437	1.04766	0.837521	0.690555	0.65269	0.935302	0.88637	0.845224	1.00202	0.808686	0.776226	0.661403	1.19927	0.833227	0.951052	0.94808	1.0263	0.748708	0.810054	0.728498	1.17644	0.571927	0.88127	0.84512	1.46289	0.92217	0.715497	0.686012	0.968659	0.818604	0.81065	0.667386	0.819606	0.960317	0.702682	0.738796	0.600507	0.842018	0.689933	0.710936	0.668069
289	250	8.371	MG(23:1)	MG	C26 H50 O4	MG(23:1)+K	C	2.25333	1.66436	1.81819	1.92665	2.19832	2.38043	0.98712	1.83842	1.9076	1.46314	1.83381	2.11114	2.07314	1.64468	1.78649	1.87694	1.99952	2.54956	2.09166	1.9307	2.29176	1.72604	1.32825	2.57179	2.01629	0.943801	0.738951	1.90034	0.89581	1.49591	1.48005	2.53999	1.95995	1.73295	2.28219	2.42303	2.37763	2.35979	2.30755	1.54552	2.95608	3.37923
290	251	2.918	MG(24:6)	MG	C27 H42 O4	MG(24:6)+H	D	0.443393	0.284141	0.319309	0.232103	0.207159	0.36648	0.862189	0.770365	0.58429	0.939841	0.530951	0.381235	0.453428	0.550711	0.533112	0.282963	0.331379	0.206056	0.224842	0.263893	0.183256	0.548041	0.372565	0.114687	0.225743	1.26293	0.96294	0.242084	0.783045	0.606865	0.190939	0.267721	0.322733	0.560827	0.251859	0.229076	0.224941	0.249211	0.112697	0.087501	0.216937	0.10274
291	252	2.648	MG(26:6)	MG	C29 H46 O4	MG(26:6)+H	D	0.122155	0.0745814	0.0921541	0.102655	0.038541	0.794789	0.856277	1.12733	0.980477	1.16402	1.50159	1.38008	1.32013	1.56198	1.37913	1.70674	1.29458	1.26655	1.5096	1.54695	1.5537	2.29841	3.20075	1.4861	1.78747	0.00615208	0.00375652	0.00434903	0.00310535	0.00287361	0.0189397	0.021688	0.030624	0.056478	0.0303192	0.0280399	0.0646323	0.0717162	0.0831939	0.0709885	0.086171	0.0613041
292	253	7.794	MG(32:2)	MG	C35 H66 O4	MG(32:2)+H	C	0.249824	0.407972	0.383539	0.364415	0.311535	0.494647	0.555435	0.658652	0.462927	0.575338	0.856637	0.697917	0.788691	0.918286	0.884041	1.06941	0.955638	0.629846	0.700693	0.877113	0.51228	0.783092	1.00713	0.531362	0.735664	1.09678	1.04616	0.821503	1.06132	0.879665	1.03702	1.18082	1.18152	1.41128	0.984275	0.941626	1.00168	1.02452	1.03039	0.815091	0.69319	0.63721
293	254	7.569	MG(34:4)	MG	C37 H66 O4	MG(34:4)+H	C	0.301672	0.375535	0.357414	0.382355	0.294032	0.435026	0.571492	0.514276	0.411384	0.50232	0.822607	0.715796	1.0715	0.99457	0.99483	1.28504	1.07951	1.05232	1.10864	1.15003	0.986797	1.09541	1.50028	0.59138	0.689911	0.662521	0.666306	0.626443	0.801317	0.502213	0.583447	0.645311	1.00561	1.04886	0.9104	0.984865	0.691532	0.909977	0.708859	0.467063	0.856373	0.426466
294	255	5.096	PA(34:2)	PA	C37 H69 O8 N0 P1	PA(34:2)+Na	C	1.97243	1.17483	1.63208	1.2775	1.07782	1.21237	0.843772	0.842879	0.821819	1.05312	1.14711	1.22209	1.07826	0.970198	1.05104	0.726261	0.68736	0.547313	0.623005	0.676805	0.402921	0.571092	0.483774	0.437188	0.413807	1.81339	1.52635	0.760971	0.980936	1.03569	0.776701	0.720289	0.696871	0.730856	0.68341	0.780817	0.705096	0.681677	0.613318	0.832174	1.06888	0.582181
295	256	5.19	PC(12:0/22:2)	PC	C42 H80 O8 N1 P1	PC(12:0/22:2)+Na	B	2.35558	1.50161	2.20652	1.2679	2.16167	1.11494	0.557375	0.742639	0.699843	0.919968	0.941145	1.04651	1.03563	0.845536	1.09423	0.755631	1.03659	0.800137	0.815131	0.701019	1.54333	0.526015	0.389904	0.794605	0.687766	1.12649	1.59623	1.79123	2.14187	1.11571	1.33257	1.56083	1.23012	1.7056	1.50742	1.11582	0.967469	1.17299	1.27226	1.37268	2.42564	1.27628
296	257	6.164	PC(14:0/24:2)	PC	C46 H88 O8 N1 P1	PC(14:0/24:2)+Na	B	0.240034	0.704891	0.479958	0.685424	0.520409	0.308654	0.71882	0.913985	0.635144	0.888112	0.23988	0.451623	0.460885	0.37839	0.332503	0.453554	0.18139	0.460442	0.614612	0.645542	0.0714179	0.162482	0.310174	0.070493	0.096557	0.614968	1.04998	1.24974	1.66657	0.5414	1.54186	0.300779	1.53409	2.78968	1.90094	0.70488	0.474255	1.24191	1.15264	1.21287	0.416438	0.261487
297	258	7.049	PC(16:0/21:1)	PC	C45 H88 O8 N1 P1	PC(16:0/21:1)+H	B	0.970551	1.33741	1.65564	1.1193	0.668573	0.538453	0.5473	0.692681	0.380728	0.503783	0.520755	0.406712	0.555244	0.310179	0.398204	0.279151	0.26593	0.19208	0.210129	0.297082	0.0732339	0.248428	0.25991	0.130091	0.131625	2.15249	2.11297	0.707512	0.827468	1.26877	0.401073	0.46466	0.319286	1.09343	0.303293	0.258853	0.309356	0.212644	0.101017	0.345281	0.296671	0.149445
298	259	5.992	PC(16:1/18:1)	PC	C42 H80 O8 N1 P1	PC(16:1/18:1)+H	B	0.255681	1.76856	0.326069	0.517192	1.49399	0.065664	1.55286	1.10942	0.199793	0.273205	0.576998	0.584356	0.297294	0.131063	0.439181	0.549897	0.257689	0.241977	0.380391	0.200148	0.0955996	0.101666	0.176899	0.170754	0.0730302	0.223767	0.26883	0.205899	0.352185	0.155843	1.42889	0.195146	0.20478	0.749365	0.293528	0.180676	0.313031	1.40622	0.0634795	0.545064	0.352692	0.124246
299	260	5.464	PC(17:0/18:2)	PC	C43 H82 O8 N1 P1	PC(17:0/18:2)+Na	B	1.2596	1.67499	1.55251	1.53499	1.67766	0.645143	0.83401	0.710838	0.735641	0.6615	0.352256	0.500383	0.383573	0.330795	0.316665	0.380854	0.373281	0.362006	0.382839	0.408436	0.153405	0.241562	0.33924	0.178088	0.182807	1.37824	1.71013	3.11837	1.57425	1.97683	2.58775	2.85339	1.59978	2.07579	2.33688	1.44614	1.39422	1.78112	2.11953	2.04422	1.1137	1.31089
300	261	5.829	PC(17:1/18:2)	PC	C43 H80 O8 N1 P1	PC(17:1/18:2)+H	B	0.524109	1.05323	0.899238	0.898947	0.722226	0.571342	0.966924	1.01213	0.91485	1.17702	0.720979	0.63109	0.743476	0.611252	0.518884	0.548953	0.579692	0.466779	0.60106	0.699179	0.153772	0.35369	0.533232	0.160327	0.204825	0.69865	0.81485	0.886102	1.32691	0.974544	0.659378	0.67062	0.932484	1.08558	0.830603	0.598113	0.603453	0.699197	0.478631	0.406054	0.349245	0.241219
301	262	1.051	PC(18:1)	PC	C26 H50 O8 N1 P1	PC(18:1)+H	C	2.73927	1.72578	2.10642	1.58357	1.19486	0.559867	2.83894	1.58449	1.30812	2.45347	1.44235	0.891329	0.448653	0.414595	0.475852	0.303512	0.300916	0.203503	0.310622	0.590156	0.110873	0.20292	0.48426	0.123259	0.0547986	2.44285	3.60903	0.803494	1.64938	2.64898	0.550662	0.331212	0.466867	1.0151	0.441468	0.290922	0.263771	0.478138	0.365032	0.503291	0.532641	0.30524
302	263	5.465	PC(18:1/19:4)	PC	C45 H80 O8 N1 P1	PC(18:1/19:4)+H	B	1.12965	1.58561	1.45965	1.44421	1.68109	0.650058	0.847877	0.728825	0.694538	0.642713	0.304432	0.524422	0.338844	0.331853	0.317679	0.364823	0.374476	0.363164	0.386953	0.409743	0.153896	0.242335	0.340326	0.178658	0.183392	1.42651	1.72353	3.13263	1.61254	1.75219	2.71988	2.86868	1.60344	2.08012	2.35025	1.31538	1.22896	1.78909	2.12968	1.77397	1.13844	1.17195
303	264	3.822	PC(21:0e)	PC	C29 H60 O7 N1 P1	PC(21:0e)+H	C	1.2038	0.605903	1.22162	0.962518	0.151166	0.500061	0.354034	0.162012	0.360242	0.61989	0.271065	0.142818	0	0.0869113	0.0955634	0	0	0.0706886	0.0680799	0	0	0.0941093	0.08886	0	0.0482524	6.87145	11.7119	1.10911	1.96548	4.7299	0.253246	0.751048	0.632953	1.86132	0.56945	0.256377	0.563652	0.554791	0.589179	0.724652	0.292202	0.528578
304	265	5.29	PC(22:2/14:1)	PC	C44 H82 O8 N1 P1	PC(22:2/14:1)+Na	B	1.08312	0.89007	1.00741	0.889959	0.866124	1.48734	1.18366	1.18118	1.19032	1.03052	1.51359	1.57636	1.51032	1.43082	1.35225	1.66433	1.58968	1.69741	1.49936	1.32815	1.84856	1.56692	1.47746	1.80604	1.76038	1.3031	1.15901	1.20711	0.999504	1.02168	1.3352	1.37723	1.22394	0.960378	1.20292	1.47582	1.40161	1.36713	1.30939	1.24011	1.50349	1.62457
305	266	4.297	PC(23:0e)	PC	C31 H64 O7 N1 P1	PC(23:0e)+H	C	1.48743	0.891965	1.42705	0.63164	0.640128	0.841225	1.11782	0.289595	0.59262	0.436897	0.137529	0.267014	0.180379	0.172618	0.375528	0	0.100362	0.0870852	0.001696	0	0	0.0993814	0.0952072	0.0129702	0.0616793	4.93309	9.00124	0.361885	2.68009	3.14597	0.353248	0.668451	0.441703	1.00327	0.279829	0.144596	0.29598	0.082543	0.187598	0	0.121403	0.142727
306	267	5.865	PC(24:1/13:1)	PC	C45 H86 O8 N1 P1	PC(24:1/13:1)+Na	B	0.253633	0.376656	0.388072	0.424438	0.429175	0.200327	1.42409	0.336952	1.34393	0.305893	0.164986	0.228414	0.832067	0.191267	0.176491	0.936044	0.220387	0.218178	0.869621	1.03003	0.0717905	1.20622	2.76241	0.0622435	0.409112	0.647957	0.901785	1.00803	1.75751	0.879583	0.738178	0.971573	0.724269	4.00953	0.797859	0.376433	0.521024	0.627261	0.390518	0.519626	0.358986	0.326182
307	268	6.611	PC(25:0/15:2)	PC	C48 H92 O8 N1 P1	PC(25:0/15:2)+Na	B	0.652716	1.50459	1.00165	1.20207	0.987931	0.328482	0.688527	0.947832	0.553108	0.862445	0.286822	0.349871	0.28944	0.286844	0.232252	0.196129	0.228943	0.192337	0.267639	0.289193	0.0277024	0.0943123	0.185612	0.0539666	0.0351357	0.969549	1.22327	1.41076	1.96315	1.08436	0.946178	0.896286	0.993865	2.59802	1.15903	0.484969	0.525528	0.738755	0.601735	0.54989	0.323138	0.287413
308	269	7.028	PC(25:0/17:2)	PC	C50 H96 O8 N1 P1	PC(25:0/17:2)+Na	B	0.69338	1.98676	1.42262	1.78585	1.31935	0.47566	0.718874	0.843978	0.72143	1.02105	0.339237	0.323887	0.313844	0.277047	0.225517	0.18713	0.197877	0.155378	0.201361	0.273269	0.034137	0.120114	0.165293	0.0793155	0.0813876	0.918904	1.57975	1.53528	2.44056	1.54763	0.618377	0.632018	0.824967	1.59214	0.82711	0.413286	0.410716	0.425513	0.420993	0.313499	0.255669	0.232049
309	270	7.24	PC(25:0/18:2)	PC	C51 H98 O8 N1 P1	PC(25:0/18:2)+H	B	0.418493	1.05237	0.761849	0.879663	0.652121	0.284674	0.485714	0.383985	0.355933	0.660565	0.888489	0.333127	0.397088	0.548736	0.589355	0.525502	0.501354	0.124227	0.297428	0.564135	0.349187	0.51537	0.510736	0.163428	0.238117	1.04834	1.86172	1.4712	2.23675	1.71177	0.527432	0.613986	0.757609	1.29251	0.745745	0.664674	0.400112	0.515725	0.455613	0.414971	0.330052	0.285811
310	271	3.841	PC(26:1)	PC	C34 H66 O8 N1 P1	PC(26:1)+H	C	0.197468	0.66856	0.210419	0.357172	0.355542	0.330496	1.30792	0.868473	0.898478	1.21793	0.957827	0.462249	0.225216	0.354685	0.268156	0.4758	0.0981906	0.246247	0.128207	0.403272	0.129195	0.174547	0.192193	0.0799117	0.394495	1.73703	1.96901	1.29328	1.74852	0.780064	0.323663	0.294638	0.60723	1.00125	0.406401	0.40123	0.483822	0.803408	0.515657	0.873991	0.443532	0.314359
311	272	6.734	PC(28:2/14:1)	PC	C50 H94 O8 N1 P1	PC(28:2/14:1)+H	B	1.1383	2.80116	1.95511	2.36221	2.2208	0.431115	0.866287	0.903314	0.540534	0.945939	0.405353	0.448732	0.379401	0.33765	0.327017	0.213622	0.267404	0.200801	0.267163	0.32833	0.100734	0.170485	0.222277	0.0704463	0.0848767	0.120583	0.106602	0.184568	0.141972	0.112661	0.0734783	0.0520722	0.164049	0.136959	0.0578728	0.064513	0.0855663	0.0801985	0.0586092	0.0780018	0.0578358	0.0506713
312	273	5.095	PC(30:0)	PC	C38 H76 O8 N1 P1	PC(30:0)+H	C	1.28488	0.681673	0.505423	0.59794	0.345175	0.703975	0.332727	0.480519	0.525126	0.378919	0.609922	0.292301	0.462046	0.444201	0.337837	0.355474	0.206104	0.163388	0.2141	0.325149	0.528187	0.428314	0.413826	0.18031	0.286042	3.11266	3.40213	0.977398	1.66236	1.84361	1.04835	0.7328	1.1721	1.43161	1.16505	0.983544	1.10035	0.908768	0.538646	0.657358	1.08504	0.423295
313	274	4.669	PC(30:1)	PC	C38 H74 O8 N1 P1	PC(30:1)+H	C	0.111974	0.411801	0.106237	0.195314	0.232708	0	0.192496	0.0660799	0.200348	0.170095	0.0650006	0.0571311	0.106676	0	0	0.0290917	0.0575093	0.0758807	0.164838	0.0398433	0	0	0.0541894	0	0.0019804	0.579251	0.932888	1.25599	2.6623	1.05734	1.89465	1.96488	2.36672	5.72623	2.63096	0.707582	0.802635	1.72417	1.41598	1.89166	0.343597	0.42494
314	275	4.908	PC(31:1)	PC	C39 H76 O8 N1 P1	PC(31:1)+H	C	0.409851	0.103389	0.274533	0.234248	0.223377	0.131394	0.185229	0.245474	0.122683	0.083878	0.0703229	0.119701	0.173888	0.0376332	0.0614755	0.134424	0.0382538	0.0860325	0.0562938	0	0.0545777	0.0421108	0.0891205	0.0668341	0.0362893	3.04564	4.19284	4.0403	5.51312	4.21256	4.19494	3.80871	3.77441	8.00868	5.11416	2.76422	2.59623	2.66579	3.33822	4.38272	1.53164	1.15498
315	276	4.52	PC(31:2)	PC	C39 H74 O8 N1 P1	PC(31:2)+H	C	0.084632	0.2247	0.13969	0.198045	0.229958	0.0695084	0.369387	0.57802	0.135449	0.177092	0.077124	0.191415	0.0932801	0.0669462	0.0657742	0.255171	0.125023	0.18865	0.0485589	0.12628	0.096603	0.0900979	0.0930822	0.0463895	0.0509336	1.19232	1.85142	3.6108	4.27523	2.33065	1.91214	1.668	1.75989	4.3796	1.85854	0.791013	0.974773	1.32766	0.988497	0.948544	0.537082	0.64834
316	277	5.568	PC(32:0)	PC	C40 H80 O8 N1 P1	PC(32:0)+H	C	2.08839	0.520738	1.22784	0.455623	0.307599	2.09288	0.900067	0.661108	0.855793	0.67458	0.648461	0.686721	0.698747	1.06723	0.923023	0.536117	0.491871	0.414337	0.402996	0.376811	0.536713	0.70636	0.703851	0.524633	0.581693	3.04498	2.74817	0.446218	1.05023	1.3222	0.629571	0.597356	0.911982	0.662321	0.622483	0.646318	0.716911	0.752962	0.551282	0.43913	0.719207	0.538815
317	278	5.124	PC(32:1)	PC	C40 H78 O8 N1 P1	PC(32:1)+H	C	0.277305	0.628068	0.455518	0.563303	0.454155	0.214452	0.429508	0.461091	0.399045	0.465564	0.241594	0.258947	0.231061	0.213217	0.188415	0.249441	0.245442	0.226075	0.275756	0.319874	0.0722558	0.15995	0.262582	0.0712239	0.090585	0.778342	1.28344	1.77609	2.03199	1.40964	1.59076	1.61802	1.74848	3.68648	1.95649	1.17404	1.1195	1.47757	1.34092	1.32258	0.737655	0.512826
318	279	4.75	PC(32:2)	PC	C40 H76 O8 N1 P1	PC(32:2)+H	C	0.380572	1.17153	0.709728	1.00114	0.811921	0.27427	0.549292	0.714135	0.588806	0.704511	0.299134	0.253697	0.231153	0.222608	0.195526	0.160611	0.183151	0.156266	0.223932	0.298178	0.0400846	0.0884943	0.153902	0.0363833	0.0487105	0.532102	0.966894	1.29564	1.77027	1.23106	1.05714	1.06919	1.23272	2.88845	1.59935	0.675578	0.760905	1.08611	0.896096	0.728142	0.382982	0.275762
319	280	5.352	PC(32:2)	PC	C40 H76 O8 N1 P1	PC(32:2)+H	C	1.9057	2.56365	1.81446	2.52355	2.11621	0.449903	0.664613	0.565849	0.534315	0.677629	0.27726	0.257099	0.227669	0.182624	0.17072	0.114795	0.115199	0.0879534	0.107387	0.137985	0.047221	0.085235	0.098362	0.0479358	0.0498339	0.674754	0.766469	0.696817	1.02896	0.672285	0.268745	0.286226	0.332953	0.489724	0.360767	0.160512	0.159509	0.152442	0.144406	0.13754	0.117388	0.0611892
320	281	4.418	PC(32:3)	PC	C40 H74 O8 N1 P1	PC(32:3)+H	C	1.70628	6.10447	3.03999	4.58316	4.19706	0.415132	0.245584	1.12181	0.861696	0.475822	0.498761	0.567367	0.450011	0.42962	0.405588	0.383777	0.385521	0.397454	0.489746	0.522755	0.198569	0.273827	0.422324	0.164546	0.172902	0.242536	0.314761	0.327284	0.913488	0.308959	0.325894	0.311581	0.428982	0.659537	0.506598	0.346477	0.417154	0.337304	0.338124	0.231476	0.323887	0.249297
321	282	5.362	PC(33:1)	PC	C41 H80 O8 N1 P1	PC(33:1)+H	C	0.487004	0.883017	0.757947	0.802081	0.748793	0.353946	0.498912	0.506687	0.413971	0.547224	0.227261	0.244865	0.1939	0.190069	0.183636	0.12876	0.138132	0.13265	0.140748	0.187767	0.0777132	0.11599	0.169375	0.0923164	0.0793746	1.71513	2.44055	2.66853	3.02094	2.25239	1.31719	1.38736	1.36205	2.48253	1.62205	0.804787	0.742711	0.982246	0.949531	1.02353	0.666595	0.590826
322	283	4.984	PC(33:2)	PC	C41 H78 O8 N1 P1	PC(33:2)+H	C	0.78421	1.41284	1.05061	1.39375	1.09041	0.457404	0.716247	0.76022	0.608369	0.789037	0.27292	0.273974	0.213185	0.223607	0.192955	0.142182	0.146245	0.131886	0.154499	0.176284	0.0841073	0.124433	0.169221	0.0822278	0.0816524	1.15582	1.60738	2.06409	2.41872	1.5872	0.830438	0.860501	0.922787	1.7941	1.11211	0.501054	0.496216	0.66742	0.583708	0.525594	0.380607	0.293918
323	284	4.658	PC(33:3)	PC	C41 H76 O8 N1 P1	PC(33:3)+H	C	2.21014	4.33058	11.8363	0.30301	3.32691	2.02406	0.332671	0.349533	0.260523	0.463848	0.130152	1.49716	2.02079	9.12485	6.88283	1.91246	1.67913	0.246188	0.0830995	0.0706243	0.946995	2.23538	2.63742	1.29248	1.12505	0.399939	0.511087	1.00553	1.31063	0.778569	0.829293	0.358291	0.567781	1.18606	0.537507	0.721219	0.952546	0.742991	0.288623	0.585184	5.27353	0.340388
324	285	6.055	PC(34:0)	PC	C42 H84 O8 N1 P1	PC(34:0)+H	C	0.737823	0.679584	0.720456	0.629654	0.571034	0.711338	0.692157	0.703219	0.661002	0.602753	0.696797	0.677858	0.662754	0.659041	0.626974	0.646304	0.639809	0.660324	0.643232	0.639416	0.65491	0.665971	0.702048	0.638786	0.603132	0.78909	0.7393	0.700355	0.657873	0.674187	0.718734	0.672086	0.679445	0.643108	0.647487	0.696313	0.719092	0.681504	0.659945	0.664499	0.697102	0.869876
325	286	5.589	PC(34:1)	PC	C42 H82 O8 N1 P1	PC(34:1)+H	C	0.734442	1.12576	1.01418	1.11899	0.917748	0.483382	0.783321	0.711156	0.640247	0.792595	0.515236	0.48709	0.467859	0.406848	0.379624	0.3442	0.34618	0.320773	0.353273	0.406403	0.167315	0.251405	0.289756	0.177669	0.165244	1.1405	1.50493	1.53276	1.73392	1.35458	1.08593	1.11274	1.27393	1.64426	1.18793	0.859032	0.825951	0.919544	0.85983	0.81298	0.69995	0.602251
326	287	9.456	PC(34:2)	PC	C42 H80 O8 N1 P1	PC(34:2)+H	C	0.337833	0.612492	1.10104	0.536266	1.25556	0.00941345	0.273506	0.380499	0.303283	2.05746	0.289662	0	0	0.200249	0.0580413	0	0	0	0	0.175221	0	0	0	0	0	0.257167	0	1.36812	3.73173	0.9705	0	0.800979	0.434612	1.65789	1.26277	0	0.0469481	0.434519	0.210345	0.120541	0	0
327	288	4.788	PC(34:3)	PC	C42 H78 O8 N1 P1	PC(34:3)+H	C	0.376511	0.917587	0.575411	0.886051	0.645676	0.41854	0.86507	1.02152	0.879406	1.02257	0.535789	0.434534	0.401016	0.410478	0.340271	0.322994	0.386779	0.277752	0.470089	0.622655	0.0615843	0.192668	0.41071	0.0851406	0.0943278	0.499273	0.837688	1.31398	1.67657	1.26363	0.793446	0.798602	1.21635	1.59585	1.13925	0.549342	0.628403	0.679132	0.505764	0.351554	0.259465	0.21832
328	289	4.451	PC(34:4)	PC	C42 H76 O8 N1 P1	PC(34:4)+H	C	1.11374	2.74655	1.67251	2.36647	2.25595	0.358506	0.93226	0.924994	0.786872	0.927871	0.335193	0.310746	0.230344	0.236276	0.203159	0.154128	0.184872	0.131104	0.192182	0.302938	0.0506815	0.0868225	0.190738	0.0565939	0.0510927	0.308321	0.479667	0.971959	1.4322	0.699699	0.301329	0.303071	0.447509	0.711037	0.35583	0.201783	0.198983	0.24204	0.162249	0.128558	0.273661	0.210061
329	290	4.141	PC(34:5)	PC	C42 H74 O8 N1 P1	PC(34:5)+H	C	1.42108	4.2036	1.73458	3.34836	3.40153	0.20464	0.493827	0.596405	0.408696	0.546852	0.187157	0.201922	0.168115	0.154673	0.122574	0.0936363	0.107092	0.122104	0.15833	0.227856	0.0279844	0.0907143	0.126896	0.028347	0.0173008	0.00771317	0.0363663	0.0466974	0.100505	0.0466176	0.016437	0.00375295	0.018537	0.103248	0.0486444	0.0311461	0.00866197	0.0187489	0.0100053	0.00326356	0.0338092	0.0363958
330	291	4.669	PC(34:5)	PC	C42 H74 O8 N1 P1	PC(34:5)+H	C	1.87482	3.50652	1.96516	3.10445	3.01162	0.0865493	0.197603	0.253964	0.139809	0.238478	0.0668179	0.0793682	0.0559781	0.0488296	0.0555869	0.000616622	0.019264	0.000518924	0.00571016	0.0233871	0.0320259	0.000947341	0.0106045	0.0220192	0.0505157	0.00122086	0.00181543	0.0187137	0.0314896	0.657256	1.1537	0.0173621	0.870298	1.90895	0.0154967	0.71736	0.751564	1.07048	0.000880308	0.00131109	0.00159566	0.172592
331	292	6.29	PC(35:0)	PC	C43 H86 O8 N1 P1	PC(35:0)+H	C	0.563179	0.314494	0.388704	0.286905	0.203918	0.5067	0.361132	0.382615	0.286722	0.421065	0.23249	0.326878	0.261485	0.324265	0.273896	0.307922	0.278886	0.228047	0.251717	0.27437	0.19425	0.44606	0.353575	0.183245	0.22424	3.18368	2.90297	0.714617	1.56812	1.80259	0.971062	0.920266	0.800247	2.07187	0.966029	0.734965	0.701298	0.912537	0.772035	0.903489	0.954599	0.703041
332	293	5.844	PC(35:1)	PC	C43 H84 O8 N1 P1	PC(35:1)+H	C	0.286842	0.668182	0.532947	0.546566	0.489512	0.200774	0.347523	0.333844	0.22702	0.336127	0.144349	0.182348	0.142769	0.138635	0.128974	0.135299	0.124846	0.111921	0.117927	0.175474	0.0347273	0.0660942	0.0990651	0.0327778	0.0340694	1.58025	2.24633	2.35374	2.86334	2.10676	1.26114	1.48854	1.16162	3.31738	1.65318	0.628922	0.622534	0.927871	0.854981	0.997009	0.514087	0.403647
333	294	6.658	PC(35:1)	PC	C43 H84 O8 N1 P1	PC(35:1)+H	C	0.269947	0.431748	0.340031	0.338042	0.246693	0.303745	0.500827	0.666673	0.546806	0.712962	0.580493	0.513306	0.639246	0.636233	0.573198	0.72344	0.616665	0.583343	0.585428	0.692837	0.232271	0.444645	0.512965	0.240799	0.2667	0.774868	1.41139	2.05933	3.09233	1.11096	1.58187	1.55956	1.50705	3.76057	1.62216	0.960318	0.808661	1.25468	1.17123	1.11414	0.74823	0.468938
334	295	5.735	PC(35:2)	PC	C43 H82 O8 N1 P1	PC(35:2)+H	C	1.27552	2.21443	1.32866	2.00264	1.86535	0.439994	0.406048	0.403692	0.505342	0.527847	0.316992	0.173899	0.181713	0.247454	0.22465	0.184321	0.188629	0.144165	0.227125	0.244317	0.0724943	0.115331	0.22725	0.0887279	0.0884188	0.657847	0.935356	0.987826	1.3295	0.760907	0.66356	0.658844	0.618129	0.947133	0.81162	0.379846	0.364939	0.498528	0.317331	0.364135	0.237927	0.175246
335	296	6.202	PC(35:2)	PC	C43 H82 O8 N1 P1	PC(35:2)+H	C	0.250772	0.526963	0.456529	0.46084	0.338753	0.389121	0.62894	0.663163	0.651663	0.830852	0.584517	0.448431	0.6757	0.536789	0.458591	0.700885	0.612319	0.596979	0.726245	0.734152	0.232422	0.533156	0.826679	0.225107	0.332354	0.667039	1.10189	0.987785	1.51725	1.04316	1.12144	1.13475	1.09282	1.73046	1.28333	0.987258	1.15996	1.33174	1.04947	1.14228	0.714059	0.453955
336	297	5.017	PC(35:3)	PC	C43 H80 O8 N1 P1	PC(35:3)+H	C	0.426745	0.80554	0.810752	0.731645	0.662717	0.365859	0.879642	0.949661	0.799991	0.951168	0.450201	0.422021	0.336489	0.378155	0.309688	0.289984	0.310655	0.264127	0.346915	0.412555	0.105484	0.231522	0.379929	0.107637	0.122696	0.958199	1.33745	1.77007	2.09523	1.44328	0.89557	0.912529	1.22346	1.56642	1.16906	0.66235	0.689646	0.83349	0.672319	0.542134	0.434956	0.386861
337	298	4.661	PC(35:4)	PC	C43 H78 O8 N1 P1	PC(35:4)+H	C	0.741459	2.05581	1.34298	1.91662	1.64843	0.390835	1.13189	1.12356	0.825968	1.10606	0.307849	0.317139	0.214901	0.234826	0.208251	0.139487	0.157356	0.134946	0.169789	0.245434	0.0408744	0.0800825	0.134631	0.0352838	0.0420691	0.464997	0.874484	1.47051	1.86256	1.09893	0.417952	0.40676	0.62721	0.933912	0.606442	0.186382	0.25443	0.296648	0.230162	0.186264	0.122223	0.0937767
338	299	5.448	PC(35:4)	PC	C43 H78 O8 N1 P1	PC(35:4)+H	C	0.69462	1.41683	1.16208	1.10033	0.930266	0.680238	1.09368	1.10487	1.02125	1.17982	0.865325	0.797228	0.798065	0.637265	0.58149	0.529522	0.507386	0.441087	0.533886	0.712636	0.145244	0.311505	0.387897	0.136019	0.173997	0.512239	0.681543	0.754051	1.06355	0.737576	0.677189	0.614313	0.861803	1.10945	0.739432	0.479379	0.528065	0.592757	0.519964	0.44204	0.314648	0.220809
339	300	4.339	PC(35:5)	PC	C43 H76 O8 N1 P1	PC(35:5)+H	C	1.20394	3.89704	1.85	2.97949	3.07651	0.243935	0.614147	0.680204	0.453549	0.726111	0.206182	0.23096	0.163374	0.163501	0.146904	0.1037	0.114277	0.261654	0.125202	0.193273	0.0237267	0.0635678	0.0974321	0.0509823	0.0637281	0.168472	0.0553911	0.196664	0.0804942	0.200824	0.176337	0.14293	0.15393	0.0776378	0.0677244	0.171658	0.177139	0.16893	0.166145	0.150904	0.174078	0.178801
340	301	5.093	PC(35:5)	PC	C43 H76 O8 N1 P1	PC(35:5)+H	C	1.65083	2.01429	2.1248	2.19119	1.99288	0.773337	1.07621	1.11135	0.778503	1.10664	0.581939	0.755827	0.556983	0.485384	0.392169	0.448847	0.39181	0.423455	0.423727	0.381905	0.431045	0.163671	0.409776	0.266163	0.680503	0.124564	0.106109	0.147161	0.0912316	0.129494	0.150182	0.17587	0.184581	0.257804	0.164334	0.136021	0.18111	0.160977	0.141756	1.68697	0.106432	0.312884
341	302	4.056	PC(35:6)	PC	C43 H74 O8 N1 P1	PC(35:6)+H	C	1.53594	3.90183	1.19514	3.01792	3.75765	0.125908	0.300792	0.284044	0.231612	0.335133	0.103551	0.112485	0.0947359	0.0732023	0.08018	0.0485436	0.0503223	0.0743582	0.0725292	0.117904	0.010218	0.0215929	0.046521	0.0051945	0.00658287	0.00236406	0.00028359	0.0001519	0	0	8.42036e-05	4.62004e-05	0.00458204	0.00460791	0.00323359	0.0019665	0	0	0.00625131	0.00421192	0.0054505	0.00285313
342	303	6.503	PC(36:0)	PC	C44 H88 O8 N1 P1	PC(36:0)+H	C	0.41287	0.268355	0.287645	0.190711	0.162695	0.510558	0.3272	0.267427	0.257868	0.330899	0.367073	0.464451	0.460116	0.796102	0.659937	1.35997	0.859711	0.436331	0.791109	0.733914	0.4096	1.21069	0.901295	0.272593	0.462645	1.36496	1.2923	0.294773	0.686906	0.727313	0.701265	0.773934	0.6487	1.78803	0.761492	0.467002	0.564607	0.776812	0.642118	0.736653	0.803091	0.648617
343	304	6.062	PC(36:1)	PC	C44 H86 O8 N1 P1	PC(36:1)+H	C	0.308859	0.598691	0.483714	0.534669	0.441128	0.262509	0.53949	0.579595	0.438637	0.650939	0.492627	0.467491	0.45765	0.405063	0.407425	0.568065	0.544848	0.492198	0.62854	0.689022	0.11104	0.239227	0.321348	0.0899631	0.1257	0.877934	1.22413	1.19667	1.53604	1.16645	1.45739	1.63805	1.36751	3.36095	1.7693	0.581789	0.654291	0.866123	0.890735	0.954751	0.474151	0.358191
344	305	5.62	PC(36:2)	PC	C44 H84 O8 N1 P1	PC(36:2)+H	C	0.313096	0.587243	0.467048	0.539477	0.48089	0.382938	0.511505	0.721867	0.716517	0.819438	0.561859	0.50343	0.575012	0.475465	0.457932	0.759315	0.682929	0.772329	0.837132	0.638647	0.323247	0.655889	1.05068	0.356924	0.365257	0.683645	0.907976	1.08083	1.32988	1.00586	1.19077	1.23011	1.30753	1.8391	1.38056	0.978006	1.03277	1.14191	0.934873	0.854041	0.636387	0.591125
345	306	4.859	PC(36:3)	PC	C44 H82 O8 N1 P1	PC(36:3)+H	C	0.801238	1.24029	0.944831	1.00201	0.875255	0.632505	0.910167	1.05103	0.853347	0.914346	0.679075	0.650674	0.531266	0.457124	0.431427	0.370904	0.498913	0.45171	0.465507	0.51751	0.157249	0.296954	0.436374	0.137801	0.102281	0.565994	0.591496	0.734947	0.875175	0.6835	0.465275	0.479078	0.613059	0.63668	0.550277	0.371339	0.153161	0.376244	0.318285	0.292896	0.105944	0.200963
346	307	6.046	PC(36:3)	PC	C44 H82 O8 N1 P1	PC(36:3)+H	C	0.829699	2.63676	1.76895	3.36474	2.68238	0.928291	0.391975	1.07233	0.386624	0.524875	0.719383	0.55388	0.774494	0.88421	0.790807	0.7054	1.02243	0.915883	1.05168	0.667424	0.711219	0.908671	1.33504	0.799789	0.739951	0.850129	0.60745	0.255496	0.168951	0.255541	0.283193	0.28338	0.246452	0.234834	0.195808	0.823945	0.76427	2.54848	0.754211	0.595663	0.729944	1.03653
347	308	4.549	PC(36:4)	PC	C44 H80 O8 N1 P1	PC(36:4)+H	C	1.16198	2.82775	1.66261	2.02666	1.9951	0.428039	0.937594	1.02395	0.653106	0.869373	0.232013	0.223841	0.383361	0.273131	0.222629	0.203975	0.228924	0.234659	0.208922	0.382652	0.0697137	0.0869582	0.186383	0.0573735	0.0606317	0.107508	0.0202774	0.0496205	0.0853434	0.0402759	0.0195832	0.0198875	0.0274972	0.0381498	0.0180834	0.0147046	0.016816	0.0211227	0.0174479	0.0107082	0.0131951	0.00799284
348	309	4.857	PC(36:4)	PC	C44 H80 O8 N1 P1	PC(36:4)+H	C	0.929856	1.2811	1.05291	1.19001	1.10369	0.737525	1.11949	1.12115	1.08649	1.1892	0.82697	0.760989	0.645283	0.639397	0.591318	0.51252	0.597074	0.495773	0.584041	0.702023	0.182739	0.345271	0.534979	0.180243	0.185211	0.61001	0.807026	0.917363	1.0664	0.833917	0.517196	0.551317	0.736913	0.787482	0.653584	0.456081	0.478624	0.47794	0.403529	0.311591	0.257336	0.242451
349	310	3.659	PC(36:5)	PC	C44 H78 O8 N1 P1	PC(36:5)+H	C	1.1595	1.56168	0.932201	1.59865	1.59974	0.622452	2.5752	0.820926	1.08832	1.51351	0.75743	0.55397	0.211654	0.294892	0.373591	0.1613	0.178069	0.10212	0.233595	0.300272	0.03381	0.0766771	0.199529	0.0449147	0.0406566	2.42798	0.288774	0.659481	0.320721	0.726769	0.204315	0.361344	0.902971	0.767949	0.467825	0.172965	0.245757	0.205189	0.159472	0.137647	0.19094	0.134563
350	311	4.535	PC(36:5)	PC	C44 H78 O8 N1 P1	PC(36:5)+H	C	1.11989	2.61928	1.61574	2.13737	2.25251	0.374382	0.85354	0.935345	0.67392	0.91789	0.376456	0.378421	0.31548	0.259143	0.234309	0.184091	0.193013	0.209989	0.240763	0.360638	0.0576824	0.0984943	0.169545	0.0521618	0.0537481	0.0294895	0.0452813	0.0547873	0.0843424	0.050696	0.027102	0.0264308	0.0399636	0.0585662	0.0350043	0.0242951	0.0234661	0.0286374	0.0194159	0.0150547	0.0154588	0.0139203
351	312	5.19	PC(36:5)	PC	C44 H78 O8 N1 P1	PC(36:5)+H	C	5.62515	2.16958	2.01597	1.99188	3.96311	1.80137	4.48559	0.600269	0.632346	1.34709	1.171	1.68451	1.38505	1.02385	1.40942	0.941901	1.41533	1.01689	0.900438	0.888067	1.98044	0.933309	0.544741	1.56247	0.958705	3.27124	2.55998	3.03686	2.07382	1.77624	3.08819	3.73392	2.16793	2.47282	2.7114	2.35319	2.72777	2.46358	2.58155	3.70374	3.05094	2.91089
352	313	3.433	PC(36:6)	PC	C44 H76 O8 N1 P1	PC(36:6)+H	C	2.14148	3.12818	2.63915	3.063	2.26628	0.388557	1.21948	0.687036	0.737219	1.34575	0.406509	0.451799	0.0490986	0.0579269	0.126223	0.00936325	0.0338969	0.0103172	0.0253696	0.105307	0.00895895	0.015199	0.0136511	0.0201831	0.0128537	0.114064	0.0637971	0.0153018	0.0122142	0.0118041	0.00903309	0.0121222	0.00859129	0.0250401	0.0173877	0.0127841	0.0101028	0.00824855	0.0107767	0.00798922	0.00640621	0.00819819
353	314	4.25	PC(36:6)	PC	C44 H76 O8 N1 P1	PC(36:6)+H	C	1.53734	3.81694	1.63211	2.9576	3.33829	0.308526	0.62851	0.684283	0.442944	0.644797	0.272765	0.304991	0.246997	0.210549	0.206666	0.159101	0.164731	0.163297	0.216922	0.262156	0.0650784	0.106056	0.123828	0.0645279	0.0667291	0.0555553	0.0485106	0.046431	0.0543662	0.049016	0.0366321	0.0418662	0.0440004	0.0434494	0.0457125	0.0417406	0.0397609	0.0429822	0.0368535	0.0370347	0.0421183	0.0402024
354	315	6.313	PC(37:1)	PC	C45 H88 O8 N1 P1	PC(37:1)+H	C	0.128256	0.317045	0.266188	0.296322	0.213669	0.101438	0.222304	0.300749	0.210415	0.301664	0.214434	0.229601	0.138195	0.213756	0.225632	0.155102	0.158466	0.135189	0.335937	0.205942	0.0742633	0.20761	0.195034	0.0571235	0.09331	1.26379	2.1248	2.24717	2.7544	2.09041	1.48715	1.84354	1.21292	5.71837	2.15916	0.56152	0.566362	0.980273	0.975614	1.19829	0.492738	0.354758
355	316	6.721	PC(37:2)	PC	C45 H86 O8 N1 P1	PC(37:2)+H	C	0.697869	1.38267	1.2284	1.00632	0.576654	0.558486	1.1558	0.978048	0.89073	0.723732	0.709462	0.539245	0.591091	0.540779	0.557943	0.416276	0.375374	0.674165	0.443698	0.492992	0.217352	0.319529	1.24477	0.345005	0.301057	1.06824	2.21914	1.3955	3.4349	0.832966	0.749407	0.89871	1.14603	3.25961	1.00136	0.654102	0.519541	0.729973	1.05058	0.790191	0.586562	0.293941
356	317	5.468	PC(37:3)	PC	C45 H84 O8 N1 P1	PC(37:3)+H	C	0.575319	1.37423	1.04695	1.28511	1.2075	0.389063	0.837163	0.8559	0.745261	1.09876	0.503737	0.390189	0.324681	0.315753	0.243497	0.217528	0.233757	0.209539	0.262131	0.361856	0.061998	0.154271	0.790263	0.0551476	0.0864882	0.827607	1.28332	1.54126	1.94294	1.46145	0.603007	0.529084	0.9479	1.26442	0.803359	0.347519	0.32673	0.421457	0.337527	0.246621	0.181859	0.173522
357	318	6.307	PC(37:3)	PC	C45 H84 O8 N1 P1	PC(37:3)+H	C	0.546354	0.225741	0.770835	1.53412	1.06692	0.710248	1.80722	1.03433	0.277639	0.958088	0.177615	0.607255	0.525988	0.377602	0.781561	0.11702	0.27776	0.264769	0.128296	0.0983703	0.0336722	0.253408	0.581788	0.724998	0.048137	2.98562	2.44631	1.00026	1.63498	1.26237	0.461434	0.696324	1.06183	1.56972	0.618172	0.324618	0.335973	0.586188	0.71888	0.381962	0.265659	0.216286
358	319	5.105	PC(37:4)	PC	C45 H82 O8 N1 P1	PC(37:4)+H	C	0.949383	2.15043	1.49656	1.91576	1.69629	0.534704	1.13861	1.27857	0.869671	1.11623	0.426402	0.503462	0.366232	0.354564	0.309834	0.234987	0.260851	0.250032	0.295489	0.426175	0.0893797	0.172535	0.274061	0.0808893	0.105179	0.24314	0.446198	0.739969	0.865247	0.562736	0.25457	0.25134	0.344233	0.531882	0.344975	0.159309	0.187799	0.204914	0.159487	0.126251	0.0883253	0.0707361
359	320	5.862	PC(37:4)	PC	C45 H82 O8 N1 P1	PC(37:4)+H	C	0.539698	0.703326	0.75576	0.702006	0.648549	0.339051	0.403223	0.412539	0.297976	0.36131	0.1938	0.285709	0.242891	0.226734	0.228508	0.197576	0.186359	0.178659	0.188617	0.213755	0.0665803	0.137457	0.145485	0.0650548	0.0675149	2.6182	2.97146	3.34209	3.07975	2.93921	2.09971	2.29516	1.5536	2.716	2.11838	1.22027	1.08379	1.51276	1.54687	1.8538	1.10374	0.865925
360	321	4.785	PC(37:5)	PC	C45 H80 O8 N1 P1	PC(37:5)+H	C	0.994071	2.86285	1.81623	2.22869	2.12468	0.748814	1.35197	1.64678	0.959124	1.28903	0.442478	0.535823	0.406609	0.366646	0.299554	0.226077	0.207787	0.220749	0.26125	0.353592	0.0924036	0.139435	0.224463	0.0580267	0.0720536	0.138617	0.102588	0.0512358	0.064575	0.0725092	0.0608729	0.0612162	0.0689143	0.0573172	0.057519	0.080635	0.0840422	0.0649554	0.0533313	0.0579635	0.0791639	0.0509012
361	322	4.418	PC(37:6)	PC	C45 H78 O8 N1 P1	PC(37:6)+H	C	1.11201	2.60263	2.12735	3.01931	2.03095	0.540442	1.0129	1.27907	0.995497	1.10602	0.542692	0.414404	0.515327	0.563628	0.677571	0.373811	0.414884	0.316814	0.376258	0.435599	0.260873	0.428921	0.431846	0.193769	0.201303	0.610516	0.41658	0.293129	0.656232	0.383995	0.322399	0.350675	0.434622	0.543027	0.474192	0.331526	0.357989	0.400171	0.275513	0.348018	0.451118	0.162214
362	323	4.654	PC(37:7)	PC	C45 H76 O8 N1 P1	PC(37:7)+H	C	0.799164	2.24587	1.38279	2.3014	1.77845	0.307643	1.03755	1.0372	0.781653	1.21733	0.181346	0.225708	0.137101	0.135817	0.141605	0.108544	0.128231	0.0912335	0.127698	0.166454	0.0276319	0.0353239	0.0988408	0.0195687	0.0172236	0.341582	0.71718	1.60893	2.28502	1.066	0.303777	0.332747	0.483374	0.869501	0.50461	0.174156	0.185216	0.297166	0.158166	0.126909	0.0922459	0.0836897
363	324	4.336	PC(37:8)	PC	C45 H74 O8 N1 P1	PC(37:8)+H	C	1.15634	3.95164	2.01381	2.82569	2.8192	0.196543	0.530791	0.642427	0.394625	0.536318	0.144978	0.185781	0.124627	0.112296	0.0936765	0.0691505	0.0734428	0.0671486	0.094956	0.133842	0.0110759	0.0352423	0.0725648	0.00815145	0.00484808	0.00939554	0.0250771	0.0120291	0.0140285	0.0148688	3.7099e-05	0	0.01333	0.00720097	0.0128946	0.000147071	0.00337258	0.00200747	0.00476311	0.000546471	0	0
364	325	6.942	PC(38:0)	PC	C46 H92 O8 N1 P1	PC(38:0)+H	C	0.378492	0.290609	0.297269	0.192176	0.17329	0.594378	0.258844	0.41923	0.572184	0.410574	0.393969	0.571902	0.510176	0.818536	0.670619	0.666358	0.652755	0.46647	0.621829	0.468007	0.40297	0.979326	0.685445	0.374832	0.501986	1.82711	1.32703	0.51024	1.05951	0.921198	0.792229	0.854382	0.707965	1.42028	0.785945	0.702529	0.684923	0.898085	0.710974	0.862137	0.916313	0.932253
365	326	6.527	PC(38:1)	PC	C46 H90 O8 N1 P1	PC(38:1)+H	C	0.136214	0.298645	0.227259	0.238949	0.189621	0.201808	0.403225	0.501081	0.410607	0.569899	0.349806	0.339731	0.394851	0.36334	0.291831	0.460472	0.408615	0.439296	0.509706	0.531168	0.0945561	0.203965	0.302663	0.0796507	0.107066	0.770791	1.25042	1.05504	1.54212	1.12371	1.49121	1.6392	1.64292	4.49364	2.00914	0.815564	0.901825	1.38902	1.32169	1.32409	0.599186	0.479959
366	327	11.724	PC(38:1)	PC	C46 H90 O8 N1 P1	PC(38:1)+H	C	0.516374	1.03714	0.728482	0.16172	0.214476	0.0850228	0.0946001	1.33778	0.116344	0.181608	1.28889	0.496738	0.249778	0.267462	0.153113	0.316038	0.455578	0.218356	0.408968	0.114413	0.275612	0.0943704	0.114476	0.130734	0	1.69842	3.19564	1.7939	2.75418	0.162284	3.38252	5.2472	1.50914	3.53306	1.73248	1.25525	1.60604	1.21627	2.73433	2.83044	4.32627	1.58713
367	328	11.73	PC(38:2)	PC	C46 H88 O8 N1 P1	PC(38:2)+H	C	1.1808	1.54234	1.50977	1.03753	0.915233	0.385185	0.983406	2.76321	0.323088	1.81589	0.793208	0.650366	0.37674	0.865582	0.201227	0.604282	0.522465	0.489049	0.571634	0.465282	0.139747	0.291703	0.343499	0.18338	0.0384074	1.119	1.80929	2.4762	3.29528	0.433204	4.22316	2.2528	2.0197	2.5201	0.854705	1.39421	1.75666	2.61806	2.85997	1.23917	1.17646	0.77748
368	329	5.686	PC(38:3)	PC	C46 H86 O8 N1 P1	PC(38:3)+H	C	1.12578	1.69511	1.25323	1.81276	1.34461	0.608051	0.905835	0.879607	0.795634	1.10671	0.481376	0.402816	0.411805	0.351683	0.363096	0.327175	0.363198	0.285712	0.386498	0.468311	0.123333	0.223989	0.349561	0.124311	0.143819	0.731485	0.967464	1.15938	1.61058	1.05768	0.53089	0.546096	0.72047	0.718802	0.663227	0.464116	0.466525	0.541827	0.355296	0.282373	0.271785	0.223817
369	330	6.521	PC(38:3)	PC	C46 H86 O8 N1 P1	PC(38:3)+H	C	0.451745	0.020862	0.529204	0.164013	0.0859695	0.378004	0.567529	0.51831	0.307836	0.616403	0.415201	0.47621	0.663653	0.701629	0.767793	1.196	0.776244	0.347941	0.768652	0.752115	0.444824	1.00997	0.783275	0.263681	0.3825	1.26239	0.996976	0.391725	0.581835	0.802386	0.808361	1.13417	0.426872	2.30188	0.864553	0.5848	0.721366	0.802052	0.872102	0.824881	0.886393	0.719085
370	331	5.293	PC(38:4)	PC	C46 H84 O8 N1 P1	PC(38:4)+H	C	1.13077	2.01011	1.49662	1.81035	1.66226	0.563707	1.05937	1.0452	0.895994	1.09041	0.562041	0.474897	0.415766	0.392954	0.370854	0.239291	0.313634	0.253123	0.337475	0.434943	0.0678145	0.117162	0.210544	0.0830244	0.0892732	0.448087	0.645015	0.849294	1.05764	0.73527	0.377795	0.406588	0.506105	0.668078	0.479488	0.237293	0.245446	0.277216	0.202612	0.154406	0.153502	0.111867
371	332	4.952	PC(38:5)	PC	C46 H82 O8 N1 P1	PC(38:5)+H	C	1.4521	3.04917	1.9518	2.92009	2.72434	0.354975	0.671627	0.647648	0.50481	0.739928	0.278298	0.29118	0.233865	0.193791	0.185644	0.132008	0.122854	0.117593	0.143203	0.19869	0.0405101	0.0675124	0.0901442	0.0308003	0.0455004	0.0209258	0.0355782	0.029921	0.0334124	0.0380185	0.0216696	0.0177091	0.0291492	0.0424915	0.0252625	0.0145975	0.0205076	0.0181296	0.0133526	0.0097487	0.0076501	0.00737633
372	333	4.622	PC(38:6)	PC	C46 H80 O8 N1 P1	PC(38:6)+H	C	1.59081	3.59739	1.97814	2.76491	3.47639	0.13087	0.416513	0.518167	0.204979	0.459805	0.139964	0.121779	0.101534	0.277706	0.0846843	0.320493	0.349077	0.0558615	0.25481	0.295928	0.286494	0.304736	0.240588	0.272343	0.201618	0.00269359	0.214631	0.00556019	0.00543076	0.00395166	0.315025	0.204809	0.00348862	0.00113844	0.00162564	0.200085	0.224869	0.17974	0.257547	0.163134	0.26904	0.277509
373	334	11.734	PC(38:6)	PC	C46 H80 O8 N1 P1	PC(38:6)+H	C	0.833257	1.32547	1.64653	1.22976	0.82129	1.27864	2.29718	2.34944	1.29916	1.95149	1.53527	1.27908	0.780624	0.47404	0.319891	1.11586	0.604962	0.958112	0.881072	0.510405	0.34298	0.566225	0.665516	0.342295	0.0651608	0.976093	1.53648	1.63236	3.30993	0.366877	1.3392	1.1299	0.848197	1.45275	0.449636	1.10805	0.748271	1.45502	0.867763	0.468762	0.814315	0.70935
374	335	4.519	PC(38:8)	PC	C46 H76 O8 N1 P1	PC(38:8)+H	C	1.09556	1.23942	1.12453	1.15653	1.19633	0.647403	0.972242	1.05752	0.910582	0.940059	0.626918	0.627098	0.575586	0.477557	0.431784	0.327712	0.353154	0.403869	0.458512	0.624822	0.0815331	0.158542	0.321821	0.0715115	0.0784424	0.0448553	0.0842918	0.0900183	0.153104	0.0902195	0.0339837	0.0332668	0.0585281	0.0983039	0.0499134	0.0310882	0.0287929	0.040394	0.0250476	0.0167587	0.0191471	0.0151002
375	336	4.255	PC(38:9)	PC	C46 H74 O8 N1 P1	PC(38:9)+H	C	1.43492	2.21671	1.2811	2.18842	2.09678	0.305445	0.674771	0.693303	0.469491	0.66312	0.304027	0.335453	0.270435	0.273056	0.271353	0.174859	0.187579	0.172663	0.223375	0.282879	0.0675464	0.13125	0.126868	0.068213	0.0715812	0.0647338	0.0431117	0.0324266	0.0372554	0.0427573	0.0253847	0.0346177	0.0502901	0.0447647	0.0479283	0.0442167	0.0445431	0.0537452	0.0357856	0.0354581	0.0454003	0.0430148
376	337	6.751	PC(39:1)	PC	C47 H92 O8 N1 P1	PC(39:1)+H	C	0.165074	0.358167	0.279444	0.255709	0.269801	0.162478	0.311748	0.417669	0.256356	0.387962	0.0710627	0.177523	0.121676	0.278724	0.185661	0.272613	0.231449	0.181921	0.259628	0.259557	0.0523682	0.147625	0.178083	0.0519398	0.0430587	1.48432	2.19027	2.04649	2.86614	2.09288	1.29733	1.63901	1.03726	4.84044	1.68838	0.67761	0.623346	1.08359	1.02475	1.26961	0.608735	0.401067
377	338	6.289	PC(39:2)	PC	C47 H90 O8 N1 P1	PC(39:2)+H	C	0.302882	0.69555	0.604527	0.806832	0.63425	0.211572	0.514799	0.481005	0.32254	0.381476	0.162777	0.162571	0.224761	0.16139	0.0828274	0.559721	0.0938586	0.150559	0.101455	0.528642	0.00831483	0.379757	0.122184	0.016336	0.0233332	1.16419	2.15952	2.37663	3.21121	2.2501	0.89648	1.28998	1.07552	2.57237	1.55387	0.582749	0.567581	0.672406	0.447203	0.660139	0.328258	0.208123
378	339	5.923	PC(39:3)	PC	C47 H88 O8 N1 P1	PC(39:3)+H	C	0.598203	2.15945	1.53659	1.76922	1.30744	0.298028	0.847972	0.834471	0.698093	1.0058	0.4471	0.577868	0.309541	0.407652	0.209118	0.115557	0.125156	0.107934	0.277186	0.30183	0.01211	0.190499	0.242672	0.00608511	0.0328001	0.893349	1.40328	1.69967	2.70586	1.67845	0.478207	0.491627	0.543609	1.26441	0.739355	0.28724	0.220924	0.303023	0.243518	0.226525	0.134693	0.126302
379	340	5.545	PC(39:4)	PC	C47 H86 O8 N1 P1	PC(39:4)+H	C	1.17332	3.18346	1.9819	2.66292	3.09799	0.102122	0.885492	0.714619	0.505878	0.952253	0.171451	0.694629	0.199319	0.0329724	0.0485225	0	0.0642197	0.0327971	0.0320125	0.0572204	0	0.000375673	0.0611012	0	0	0.0778321	0.54073	0.369212	1.07094	0.689019	0.093022	0.0492164	0.246672	0.525805	0.160912	0.0982894	0	0.00147963	0.124342	0.034588	0	0.029478
380	341	5.083	PC(39:7)	PC	C47 H80 O8 N1 P1	PC(39:7)+H	C	2.70915	6.2533	4.68804	5.11156	8.04876	0.651826	1.58556	2.01594	1.80401	4.16083	0.568994	0.520604	0.19437	0.424843	0.101544	0.502282	0.621809	0.76132	0.546396	0.802736	0.425991	0.0729204	0.0219724	0.238386	0.00412918	0.402845	0.438974	1.60987	1.17558	0.7588	0.577966	0.533007	0.0611706	0.507362	0.219836	0.0830481	0.0822302	0.252206	0.130112	0.184199	0.0577478	0.149395
381	342	4.79	PC(39:8)	PC	C47 H78 O8 N1 P1	PC(39:8)+H	C	1.57912	3.41481	1.58625	1.99696	4.45331	0.906724	1.01223	2.46614	0.995529	1.86455	0.498573	0.626136	0.380463	0.101392	0.102046	0.582952	0.698531	0.786425	0.658107	0.488468	0	0.337836	0.250095	0.0027475	0.0980889	0	0	0	0	0	0	0	0	0	0	0	0	0	0	0	0	0
382	343	7.331	PC(40:0)	PC	C48 H96 O8 N1 P1	PC(40:0)+H	C	0.637534	0.690348	0.671456	0.523708	0.348836	0.963299	0.631244	0.673078	0.671769	0.694102	0.508493	0.533229	0.4189	0.50232	0.525631	0.437917	0.31209	0.250628	0.284826	0.31713	0.299406	0.418413	0.464012	0.241357	0.235805	2.09644	2.43874	0.829937	1.89671	1.54256	0.575488	0.61667	0.918113	1.25661	0.771283	0.536044	0.535203	0.591626	0.419142	0.302101	0.384978	0.36146
383	344	6.947	PC(40:1)	PC	C48 H94 O8 N1 P1	PC(40:1)+H	C	0.323233	0.728935	0.569665	0.639653	0.506265	0.207388	0.432283	0.476089	0.450277	0.597948	0.268352	0.240409	0.263416	0.231993	0.22174	0.294105	0.301467	0.215335	0.288336	0.347097	0.0891296	0.151993	0.232285	0.0840442	0.097627	1.18062	1.70494	1.36143	2.17737	1.5267	1.13673	1.22029	1.1559	2.9316	1.46796	0.730262	0.576143	0.979611	0.895352	0.811196	0.479375	0.461175
384	345	6.13	PC(40:3)	PC	C48 H90 O8 N1 P1	PC(40:3)+H	C	1.07348	1.61384	1.2761	1.64689	1.2921	4.9885	0.9633	0.949857	1.27522	1.00727	0.698127	0.935903	0.690975	0.697966	0.694405	0.615697	0.763851	0.486413	0.836041	0.671529	1.01833	0.895375	0.628595	0.919669	0.633691	0.828593	1.08902	1.20389	1.53706	1.03545	0.643444	0.737296	0.691525	0.850238	0.682642	0.994896	0.737325	0.587587	0.620138	0.548234	0.666726	0.837049
385	346	5.743	PC(40:4)	PC	C48 H88 O8 N1 P1	PC(40:4)+H	C	1.76591	2.12476	1.28999	2.48492	1.61475	0.759587	1.62792	1.18708	0.96024	1.33063	0.55613	0.74206	0.519158	0.521827	0.372329	0.308762	0.194016	0.230254	0.122509	0.42523	0.0284294	0.0991022	0.083981	0.0632461	0.0332148	0.711254	0.984019	1.02333	1.42232	0.658672	0.518287	0.473367	0.5879	0.449822	0.432454	0.0954115	0.209401	0.270442	0.0606482	0	0.161818	0.0608206
386	347	4.96	PC(40:8)	PC	C48 H80 O8 N1 P1	PC(40:8)+H	C	1.48814	1.98952	1.82992	1.95713	2.06671	0.55534	0.629924	0.623083	0.529462	0.627508	0.33412	0.501046	0.393056	0.309168	0.304808	0.202856	0.223373	0.244163	0.252624	0.337922	0.0903809	0.124993	0.132434	0.0228469	0.0686676	0.0240383	0.0408817	0.0366217	0.0386944	0.0497314	0.0205797	0.0300756	0.0213531	0.0594935	0.0376289	0.0200175	0.00790741	0.0227258	0.0154159	0.0127971	0.00456356	0
387	348	7.163	PC(41:1)	PC	C49 H96 O8 N1 P1	PC(41:1)+H	C	0.303774	0.767231	0.594383	0.662683	0.490517	0.253637	0.429545	0.373673	0.342107	0.381977	0.315096	0.178802	0.159908	0.202832	0.25033	0.16914	0.154489	0.162807	0.128541	0.259673	0.0774816	0.164379	0.179796	0.0757545	0.111664	1.89137	3.12974	2.35597	3.23877	2.70469	1.03351	1.11113	1.08293	2.97206	1.36177	0.583621	0.621437	0.736892	0.64443	0.664926	0.570274	0.375594
388	349	6.825	PC(41:2)	PC	C49 H94 O8 N1 P1	PC(41:2)+H	C	0.590874	1.50975	1.06942	1.03098	1.04623	0.348898	0.605949	0.559465	0.468079	0.629158	0.23525	0.182698	0.195216	0.215889	0.176094	0.121945	0.186675	0.125448	0.153175	0.145636	0.0637257	0.100002	0.104955	0.0447683	0.0875587	1.37902	2.10343	1.85472	2.63572	1.70298	0.660085	0.719437	0.757002	1.66851	0.958521	0.487999	0.456116	0.530394	0.497518	0.439581	0.35314	0.27283
389	350	6.583	PC(41:3)	PC	C49 H92 O8 N1 P1	PC(41:3)+H	C	0.145752	0.27332	1.83331	1.16832	0.950499	0.203171	0.242155	0.260664	0.234431	0.230779	2.3899	0.0112477	1.25899	0.279823	0.153059	0.417517	0.197261	0.295803	0.42244	0.479702	0.0150408	0.224897	0.597663	0.00239661	0.165067	0.236416	0.181866	0.165607	0.467564	0.246429	0.00461279	0.507149	0.0128554	0.383666	0.441866	0.438901	0.197645	0.414113	0.229714	0.443947	0.173336	0.131787
390	351	7.36	PC(42:1)	PC	C50 H98 O8 N1 P1	PC(42:1)+H	C	0.456428	1.0735	0.873684	0.900713	0.698673	0.372639	0.661934	0.666775	0.556243	0.74928	0.29859	0.333613	0.301261	0.299744	0.252674	0.227733	0.239468	0.184067	0.225093	0.275127	0.114329	0.21729	0.301373	0.114426	0.120955	1.43984	2.09508	1.62963	2.62419	1.74248	0.805919	0.899449	1.00527	1.87181	1.01955	0.58757	0.575377	0.783491	0.613651	0.490024	0.441418	0.304439
391	352	6.246	PC(42:4)	PC	C50 H92 O8 N1 P1	PC(42:4)+H	C	3.52004	5.79344	2.81955	4.61363	4.68593	0	0.212326	0.569915	0	0.148052	0	0	0	0	0	0	0	0	0	0	0	0	0	0	0	0	0	0.220318	0	0	0	0	0	0	0.185513	0	0	0	0	0	0	0
392	353	6.917	PC(43:3)	PC	C51 H96 O8 N1 P1	PC(43:3)+H	C	0.819779	1.2114	0.515268	1.09909	1.12614	0.24027	0.208393	0.655505	0.161791	0.254392	0.753254	0.0400462	0.163757	0.220685	0.226763	0.714126	0.223208	0.361624	0.152539	0.658754	0.233169	0.30647	0.281887	0.405413	0.14215	1.12822	0.44838	0.0522076	0.173417	0.195073	0.427571	0.161231	0.89237	0.984147	0.409171	0.338181	0.152284	0.84894	0.700944	0.645138	0.332658	0.152528
393	354	7.719	PC(44:1)	PC	C52 H102 O8 N1 P1	PC(44:1)+H	C	0.461263	1.18896	1.16322	0.981167	0.850179	0.37929	0.773614	0.695932	0.592802	0.692047	0.457575	0.370248	0.261905	0.316923	0.348019	0.190872	0.20782	0.139325	0.190322	0.216186	0.0909067	0.147105	0.241875	0.11657	0.148324	1.05086	1.83313	1.1017	1.88225	1.17315	0.468078	0.492929	0.736167	0.95149	0.57424	0.326795	0.39584	0.407242	0.378539	0.346886	0.281957	0.351959
394	355	7.43	PC(44:2)	PC	C52 H100 O8 N1 P1	PC(44:2)+H	C	0.618702	1.20237	0.823262	1.11512	0.936907	0.605873	1.04698	0.665565	0.841056	0.849957	0.516383	0.352825	0.409878	0.421371	0.337784	0.224237	0.305626	0.199174	0.176558	0.405645	0.145214	0.171456	0.246548	0.103947	0.152862	1.03047	1.14429	0.741015	1.09113	0.837944	0.223687	0.362037	0.430363	0.62417	0.447629	0.316925	0.354647	0.211841	0.318883	0.274618	0.167465	0.114079
395	356	7.142	PC(44:3)	PC	C52 H98 O8 N1 P1	PC(44:3)+H	C	0.377457	0.452979	0.301676	0.406119	0.370089	0.499931	0.932288	0.575663	0.491379	0.93994	0.640583	0.40512	0.171208	0.52844	0.434996	0.260933	0.199937	0.0161972	0.182321	0.377593	0.050951	0.219014	0.249944	0.0443145	0.165191	0.456135	0.755585	0.949976	0.930263	0.099477	0.144799	0.282022	0.414556	0.2672	0.170719	0.278902	0.30574	0.310356	0.135788	0.138544	0.208608	0.611519
396	357	7.718	PC(46:2)	PC	C54 H104 O8 N1 P1	PC(46:2)+H	C	0.265397	0.0499862	0.366358	0.409778	0.0708947	0.672018	0.240715	0.752709	0.684597	0.481462	0.415048	0.282839	0.102684	0.6667	0.153108	0.457904	0.235464	0.27638	0.129518	0.194781	0.296801	0.372398	0.000988272	0.321667	0.146681	0.395337	0.793111	0.330453	0.107731	0.567673	0.375203	0.278866	1.01415	0.148383	0.245742	0.360614	0.00123362	0.20585	0.549832	0.696779	0.431549	0.443159
397	358	8.058	PC(48:2)	PC	C56 H108 O8 N1 P1	PC(48:2)+H	C	0.0862419	0.274411	0.444433	0.434326	0.271267	0.650451	1.35914	0.138312	0.131657	0.0985252	1.83217	0.648909	0.542205	0.0793854	0.145	0.968918	0.213654	0.334551	0.552123	0.167479	1.93122	0.401611	0.264779	1.34296	0.189025	0.94794	0.256858	0.198057	0.090641	0.10563	0.125013	0.085974	0.510001	0.410715	1.17138	0.501214	0.873612	0.194696	0.437539	0.389044	2.00627	1.87825
398	359	8.32	PC(49:2)	PC	C57 H110 O8 N1 P1	PC(49:2)+H	C	0	0.0603605	0.0705668	0	0.0667945	0.466754	0.235838	0.476578	0.387946	0.798641	1.31301	0.434979	0.120389	1.79052	0.958044	0.239809	0.104004	0.00509629	0.384084	1.48598	0.144567	0.11532	0.67141	0.176391	0.114586	0.964255	1.18108	0.145963	0.16888	0.851409	0.235066	0.724902	1.46914	0.355069	0.855615	0.114051	0.380386	0.59213	0.261096	1.30092	0.231347	0.0708049
399	360	5.136	PE(15:0/18:2)	PE	C38 H72 O8 N1 P1	PE(15:0/18:2)+H	A	1.12783	2.14153	2.05192	1.88607	1.57469	0.802129	1.45572	1.4435	1.20266	1.52636	0.644459	0.621943	0.168631	0.101903	0.122263	0.272864	0.289863	0.222087	0.279103	0.388643	0.145293	0.269322	0.406226	0.156243	0.188827	0.874569	1.25779	2.03387	2.3337	0.357568	0.659671	0.107751	0.768699	0.187673	0.10946	0.0990764	0.433729	0.439989	0.398421	0.147187	0.301164	0.216609
400	361	5.49	PE(16:0/16:0)	PE	C37 H74 O8 N1 P1	PE(16:0/16:0)+H	A	0.548826	0.633833	0.616736	0.545772	0.403493	0.482591	0.700115	0.60801	0.560815	0.727337	0.751936	0.545968	0.728966	0.641766	0.504123	0.449082	0.417238	0.428485	0.541765	0.587263	0.308037	0.59457	0.714913	0.298388	0.40863	1.3414	1.28062	0.734583	1.02244	1.07626	0.728149	0.645021	0.990582	1.14206	0.78047	0.694344	0.887883	0.613372	0.464465	0.520767	0.604194	0.347622
401	362	5.09	PE(16:0/16:1)	PE	C37 H72 O8 N1 P1	PE(16:0/16:1)+H	B	1.18448	1.03558	1.37897	0.994713	0.69335	0.667029	0.753631	0.740795	0.580734	0.855647	0.910174	0.849002	0.872426	0.620422	0.701711	0.352585	0.359655	0.235471	0.302873	0.368994	0.183231	0.323461	0.371419	0.204365	0.228837	1.48927	1.41795	0.555641	0.966079	0.982697	0.461731	0.456112	0.653459	0.741123	0.525485	0.368622	0.484851	0.390939	0.332454	0.39541	0.470823	0.245359
402	363	5.749	PE(16:0/18:1)	PE	C39 H76 O8 N1 P1	PE(16:0/18:1)+H	A	0.575328	0.906742	0.924286	0.879793	0.69106	0.610602	0.886418	0.921883	0.893403	0.979281	0.787255	0.678648	0.807908	0.658131	0.639433	0.697269	0.641557	0.618874	0.653609	0.695732	0.356206	0.625739	0.842811	0.429772	0.437175	0.887253	1.13649	1.11964	1.40522	1.07358	0.773356	0.804532	1.01267	1.22879	0.907333	0.723086	0.738521	0.728773	0.630667	0.583785	0.537681	0.412829
403	364	5.379	PE(16:0/18:2)	PE	C39 H74 O8 N1 P1	PE(16:0/18:2)+H	A	0.976855	1.49529	1.31728	1.34379	1.15157	0.790095	1.11171	1.11046	1.04434	1.1319	0.931236	0.838099	0.8055	0.696278	0.680918	0.537406	0.617345	0.528622	0.610165	0.748397	0.26344	0.443613	0.575749	0.30054	0.317035	0.71643	0.909212	0.991529	1.16668	0.885867	0.675606	0.684708	0.852532	1.01692	0.792625	0.526671	0.53446	0.512766	0.460034	0.456479	0.3385	0.264571
404	365	5.044	PE(16:0/18:3)	PE	C39 H72 O8 N1 P1	PE(16:0/18:3)+H	A	1.66769	1.94357	2.00764	1.79676	1.88317	0.899518	0.764345	0.899652	0.694313	0.933133	0.856743	0.843552	0.872475	0.774383	0.799458	0.823641	0.710648	0.669767	0.710687	0.659299	0.741884	0.859389	0.840617	0.65934	0.734989	0.355527	0.335988	0.119889	0.218179	0.22056	0.178344	0.184078	0.145176	0.165765	0.160045	0.222234	0.241245	0.17032	0.17828	0.205624	0.31105	0.246498
405	366	2.131	PE(16:0e)	PE	C21 H44 O7 N1 P1	PE(16:0e)+H	C	2.25265	1.1422	2.70336	1.19782	0.695663	1.63762	1.62741	1.28714	1.36981	1.6065	1.00584	0.944595	1.11149	1.00703	1.04805	0.746745	0.633715	0.484679	0.463251	0.552659	0.355089	0.620661	0.937846	0.353518	0.496488	2.19825	2.75301	0.313537	0.901277	1.19598	0.348897	0.320166	0.396202	0.566193	0.337428	0.282924	0.246348	0.263909	0.192955	0.284691	0.226197	0.132354
406	367	2.588	PE(16:0e)	PE	C21 H44 O7 N1 P1	PE(16:0e)+H	C	2.02432	1.22722	2.48572	1.13363	0.670068	1.36317	1.33949	1.24636	1.46733	1.55768	0.928417	0.904641	0.919017	0.940123	0.839666	0.670307	0.554718	0.448845	0.451869	0.475655	0.275855	0.610692	0.851572	0.346583	0.449145	1.64909	2.61942	0.29754	0.965147	1.36294	0.303825	0.295894	0.390978	0.926543	0.321818	0.269833	0.257138	0.269765	0.1976	0.290277	0.192323	0.148291
407	368	4.885	PE(16:1/16:1)	PE	C37 H70 O8 N1 P1	PE(16:1/16:1)+H	B	0.973085	1.41881	1.33046	1.27591	1.04787	0.353633	0.849645	0.956575	0.800944	1.02884	0.655202	0.655613	0.574717	0.58985	0.560263	0.441029	0.363939	0.130192	0.417801	0.529508	0.210817	0.246157	0.106048	0.155357	0.20929	1.55752	0.907883	1.00958	1.09944	0.993146	0.875841	0.346282	0.818682	2.09155	1.10012	0.431089	0.293586	0.803922	0.765963	0.416533	0.289836	0.111027
408	369	4.75	PE(16:1/18:2)	PE	C39 H72 O8 N1 P1	PE(16:1/18:2)+H	B	1.48732	0.533411	1.60417	0.622619	0.227173	0.961081	0.579121	0.678801	0.443742	0.661971	1.99013	1.30628	1.68692	1.01919	1.12967	0.212052	0.215754	0.17183	0.204701	0.273518	0.20839	0.508945	0.321824	0.266104	0.307369	1.9986	1.85217	0.285693	0.762396	1.02772	0.330081	0.342772	0.464832	0.381828	0.377884	0.372428	0.408502	0.328233	0.280738	0.363562	0.37965	0.163478
409	370	5.987	PE(17:0/18:1)	PE	C40 H78 O8 N1 P1	PE(17:0/18:1)+H	A	0.477059	0.962265	0.997658	0.83595	0.709579	0.389282	0.64061	0.637566	0.470048	0.709833	0.309101	0.330118	0.273432	0.261428	0.246061	0.212775	0.201054	0.148346	0.164403	0.236451	0.0834485	0.185727	0.226474	0.108981	0.0939452	1.44227	2.15454	1.97647	2.77559	1.73225	0.883998	0.975745	0.874231	2.35804	1.12545	0.450521	0.436222	0.567187	0.486248	0.617751	0.360067	0.284643
410	371	5.617	PE(17:0/18:2)	PE	C40 H76 O8 N1 P1	PE(17:0/18:2)+H	A	1.77949	3.22707	3.24911	2.9383	2.53211	1.16804	0.284507	1.55024	0.253163	1.86857	0.828872	0.732413	0.139202	0.585887	0.558122	0.499531	0.152039	0.426362	0.156839	0.186546	0.0668856	0.421118	0.880781	0.0765427	0.0983549	1.59285	2.04187	0.884773	0.983143	0.72863	0.650026	0.591086	0.106837	1.01744	0.811598	0.575493	0.574068	0.049808	1.51796	0.570505	0.394443	0.799595
411	372	5.162	PE(17:1/18:2)	PE	C40 H74 O8 N1 P1	PE(17:1/18:2)+H	B	0.530898	1.1561	0.935203	0.191826	0.232496	0.419116	0.86754	0.872002	0.720805	0.891856	0.435341	0.435862	0.383205	0.360149	0.305506	0.229872	0.265848	0.210408	0.278074	0.348396	0.112479	0.214389	0.333556	0.247292	0.131683	0.798281	1.19094	1.6032	1.99084	1.33433	1.05866	0.983089	1.30781	1.78325	1.09954	0.716804	0.740326	0.857688	0.770839	0.70987	0.512928	0.40608
412	373	6.214	PE(18:0/18:1)	PE	C41 H80 O8 N1 P1	PE(18:0/18:1)+H	A	0.552598	0.992751	0.953449	0.891969	0.645655	0.484224	0.77216	0.849003	0.699908	0.903192	0.662945	0.576796	0.671511	0.554204	0.512521	0.686749	0.62023	0.571832	0.702386	0.687277	0.174116	0.381982	0.508714	0.162692	0.20727	0.545911	0.811508	0.673451	0.917819	0.678451	0.668537	0.769077	0.682371	1.97771	0.88214	0.333246	0.397417	0.483572	0.479694	0.569996	0.271443	0.214037
413	374	2.61	PE(18:0p)	PE	C23 H46 O7 N1 P1	PE(18:0p)+H	C	0.620475	0.445842	0.523186	0.129331	0.298344	0.0722895	0.182527	0.233219	0.244818	0.0913398	0.813291	0.598091	0.130361	0.291075	0.238312	0.264406	0.57485	0.122686	0.245977	0.0900543	0.0653355	0.908637	0.544638	0.435204	0.0834231	0.247737	0.909982	0.217061	0.552216	0.119172	0.125452	0.0458212	0.482731	0.507158	0.340492	0.540764	0.548726	0.191082	0.405164	0.492148	0.140057	0.0409147
414	375	5.786	PE(18:1/18:1)	PE	C41 H78 O8 N1 P1	PE(18:1/18:1)+H	A	0.214942	0.806399	0.690338	0.316921	0.552946	0.306317	0.776935	0.809729	0.757805	0.882804	0.754415	0.425529	0.81289	0.652167	0.583427	0.924594	0.850785	0.864231	0.931527	0.913541	0.402725	0.843016	1.26357	0.485637	0.531244	0.502639	0.617256	0.721974	0.916151	0.714458	0.854301	0.884338	1.05113	1.49938	1.00605	0.845783	0.840475	0.992892	0.791252	0.72363	0.585191	0.463112
415	376	5.408	PE(18:1/18:2)	PE	C41 H76 O8 N1 P1	PE(18:1/18:2)+H	A	0.481052	0.80711	0.687023	0.731587	0.631688	0.648517	0.948717	0.992239	0.954464	1.06205	0.902831	0.778294	0.839374	0.74663	0.702124	0.803455	0.801264	0.755634	0.849238	0.957321	0.339215	0.695538	0.996891	0.422096	0.44893	0.719482	0.854535	1.02244	1.23579	0.990297	0.925068	0.901765	1.18908	1.26703	1.02164	0.873095	0.895858	0.955629	0.79484	0.721814	0.583107	0.475267
416	377	5.024	PE(18:2/18:2)	PE	C41 H74 O8 N1 P1	PE(18:2/18:2)+H	A	0.896095	1.08418	1.04928	1.12678	0.996211	0.811263	0.966912	1.02098	0.962007	1.11886	0.886743	0.792809	0.739762	0.865042	0.765243	0.74214	0.69425	0.607129	0.74028	0.739067	0.460293	0.704407	0.806041	0.447694	0.494623	0.762578	0.812926	0.845487	1.00166	0.76533	0.750014	0.74453	0.944903	1.03531	0.86724	0.74169	0.78093	0.860784	0.729225	0.632799	0.659959	0.468519
417	378	3.786	PE(18:3/18:2)	PE	C41 H72 O8 N1 P1	PE(18:3/18:2)+H	B	0.717567	0.61566	0.653787	0.539143	0.451919	0.479106	1.07897	0.753002	0.652337	1.01357	0.595724	0.391715	0.219113	0.313496	0.296348	0.109402	0.138883	0.0645533	0.100821	0.238414	0.034251	0.0724885	0.0759786	0.0317677	0.0334802	1.4949	1.42492	0.352955	0.70368	0.874721	0.245276	0.254407	0.63242	0.642477	0.452587	0.224582	0.271863	0.228285	0.262459	0.230686	0.220128	0.108895
418	379	4.681	PE(18:3/18:2)	PE	C41 H72 O8 N1 P1	PE(18:3/18:2)+H	B	1.2188	2.56482	1.96928	2.22425	2.00827	0.388364	0.865926	0.874953	0.562911	0.852966	0.436263	0.456902	0.402956	0.343137	0.325373	0.2524	0.244696	0.210276	0.291539	0.379724	0.0941905	0.162334	0.237083	0.0812252	0.0948084	0.0415775	0.0494305	0.061902	0.087384	0.0611684	0.0596016	0.0536092	0.0732063	0.102227	0.0767629	0.056541	0.0638965	0.0024685	0.0505886	0.0421702	0.0432394	0.0306936
419	380	3.018	PE(19:2)	PE	C24 H44 O8 N1 P1	PE(19:2)+(CH3CH2)3NH	D	0.498266	0.172257	0.497542	0.367659	0.0736321	2.15788	1.05824	0.566353	0.312806	1.33459	2.63111	1.35143	0.912573	0.874828	0.458325	0.777638	0.46454	0.091766	0.166754	0.231182	0.0181505	0.717898	0.64401	0.00903056	0	3.94543	2.86243	0.768786	3.08903	2.56473	0.494674	0.80772	0.781452	1.41067	0.262941	0.114634	0.402614	0.15407	0.140908	0.179359	0.0172467	0
420	381	3.503	PE(19:2)	PE	C24 H44 O8 N1 P1	PE(19:2)+(CH3CH2)3NH	D	0.228502	0.151109	0.273006	0.0772935	0.0486114	1.12657	0.229878	0.63269	0.350115	0.878604	1.33033	0.977323	0.714888	0.35673	0.298787	0.287259	0.243826	0.0940795	0.111948	0.132004	0.0407846	0.299918	0.401977	0.00984107	0.0136395	0.520949	0.33321	0.062643	0.265269	0.227658	0.0312642	0.0466901	0.0605398	0.0761166	0.0289719	0.0129155	0.0299973	0.0116403	0.00591624	0.0119683	0.00718748	0.000526872
421	382	6.203	PE(20:1/18:1)	PE	C43 H82 O8 N1 P1	PE(20:1/18:1)+H	B	0.266303	0.514679	0.449692	0.496877	0.342508	0.372089	0.648483	0.632277	0.539696	0.767037	0.51339	0.439726	0.585824	0.468708	0.414034	0.712114	0.623382	0.546566	0.673218	0.64288	0.212331	0.444666	0.789707	0.218232	0.297111	0.63521	0.845333	0.95517	1.52837	0.96142	1.08608	1.05565	1.02123	1.61709	1.00047	1.0032	0.930964	1.33149	1.02891	0.532968	0.742344	0.427485
422	383	5.538	PE(21:1e)	PE	C26 H52 O7 N1 P1	PE(21:1e)+(CH3CH2)3NH	D	2.72864	2.43467	2.11543	2.08894	2.38149	1.75841	1.35898	1.24395	1.39474	1.07447	1.22647	1.59088	1.45954	1.28029	1.29953	1.57595	1.5563	1.57836	1.53998	1.3789	1.95659	1.54423	1.4228	1.80849	1.74576	0.598239	0.663546	0.912371	0.475642	0.555663	1.05233	1.02784	0.659204	0.435114	0.75527	1.07193	0.928027	0.914024	1.18587	1.06255	1.27188	1.42102
423	384	5.962	PE(22:2)	PE	C27 H50 O8 N1 P1	PE(22:2)+(CH3CH2)3NH	C	0.735198	0.71805	0.744052	0.693652	0.675669	0.807246	0.789685	0.73403	0.781616	0.869881	0.812233	0.83415	0.73262	0.741315	0.775738	0.572559	0.59337	0.61376	0.67429	0.614246	0.797627	0.77656	0.724887	0.701947	0.643028	0.841467	0.741992	0.556338	0.825001	0.594127	0.573495	0.775237	0.596497	0.645098	0.56726	0.621183	0.560992	0.565676	0.556345	0.599133	0.534057	0.552919
424	385	6.218	PE(23:0)	PE	C28 H56 O8 N1 P1	PE(23:0)+(CH3CH2)3NH	D	1.12275	0.917816	1.01738	0.985053	0.709832	1.05643	0.919243	0.97738	1.08054	0.98414	1.10183	1.15765	1.29233	1.36147	1.18182	1.18396	1.15654	0.87623	0.956446	0.988379	0.868991	1.21072	1.24509	0.692959	0.980464	1.54195	1.47103	1.14887	1.20843	1.29378	0.813494	0.743442	1.01089	0.525906	0.802746	0.999789	1.01542	0.962453	0.65182	0.545308	0.736202	0.435706
425	386	6.447	PE(24:0)	PE	C29 H58 O8 N1 P1	PE(24:0)+(CH3CH2)3NH	D	0.620278	0.691672	0.63659	0.651757	0.41121	0.148654	0.27324	0.257347	0.317894	0.316294	0.194666	0.223051	0.355948	0.387317	0.286162	0.29344	0.24452	0.187883	0.204638	0.206079	0.11751	0.29011	0.281873	0.179348	0.180104	3.26561	3.58567	3.00494	3.48067	2.69252	0.789864	0.790706	1.16612	1.29229	0.930454	0.875422	0.779967	1.02809	0.500011	0.560327	0.519645	0.342352
426	387	5.194	PE(24:1p)	PE	C29 H56 O7 N1 P1	PE(24:1p)+H	D	5.53197	2.32518	4.00975	1.93311	0.00407128	15.2176	0.862924	2.10499	1.87315	1.96263	5.64109	10.3784	7.18843	2.87591	2.48705	2.94011	3.37016	1.96212	1.74058	0.643694	3.62975	5.53123	4.00655	0.684984	0.78678	14.5574	9.16007	6.75962	3.90003	5.17766	9.69956	7.20305	4.16502	2.93587	1.66018	4.03509	5.9301	3.05662	3.31029	4.66582	4.80795	1.28394
427	388	5.799	PE(25:3e)	PE	C30 H56 O7 N1 P1	PE(25:3e)+(CH3CH2)3NH	D	3.62295	1.30111	1.37896	0.723736	0.768259	0.295819	0.792641	0.837936	0.804998	1.22488	0.429346	0.643701	0.812821	0	0.647925	0	0	0	0	0	0	0.0122514	0	0	0	6.6454	5.03748	1.57435	3.97091	13.3833	2.32417	0.477276	0.670138	1.26905	0.747925	0.499434	0	0	0.816228	1.22752	0.556832	0.188721
428	389	5.506	PE(26:3p)	PE	C31 H56 O7 N1 P1	PE(26:3p)+(CH3CH2)3NH	D	0.500435	0.402349	0.426701	0.329566	0.1707	0.481246	0.424818	0.412834	0.380345	0.674788	1.2139	0.867012	1.42502	0.750832	0.772353	0.406359	0.370382	0.357468	0.396612	0.417093	0.244026	1.05744	0.530783	0.388444	0.564295	1.72805	1.81725	0.425221	0.673917	0.953009	0.670042	0.676563	0.741635	0.68467	0.740003	0.940032	0.844575	0.729091	0.67093	0.963817	0.744511	0.367738
429	390	3.848	PE(26:5)	PE	C31 H52 O8 N1 P1	PE(26:5)+(CH3CH2)3NH	D	0.70319	0.155248	0.332273	0.275863	0.0482238	0.458436	0.896559	0.363319	0.221746	0.513426	1.66397	0.630435	1.18255	0.742527	0.374983	0.145435	0.0769847	0.0197659	0.0798797	0.223403	0.0362076	0.349883	0.11418	0.0355604	0.121486	2.55808	1.83665	0.135973	1.00056	1.09611	0.206269	0.223592	0.327344	0.226248	0.181134	0.14846	0.189382	0.138912	0.122442	0.225996	0.210999	0.0234339
430	391	3.622	PE(26:6)	PE	C31 H50 O8 N1 P1	PE(26:6)+(CH3CH2)3NH	D	0.791163	0.149869	0.627069	0.221934	0.0702145	0.651811	0.597393	0.407721	0.361739	0.554626	1.60471	0.647388	0.529951	0.441781	0.571052	0.0866737	0.0485662	0.0369863	0.0752632	0.0917073	0.0302485	0.124088	0.0934075	0.0265531	0.136515	2.73065	1.89889	0.137247	0.407401	0.813583	0.123295	0.0991247	0.186066	0.167542	0.10908	0.114421	0.101726	0.0707498	0.0785336	0.108789	0.0800391	0.0269155
431	392	4.013	PE(27:6)	PE	C32 H52 O8 N1 P1	PE(27:6)+H	D	0.407207	0.414472	0.373323	0.247983	0.173193	0.963022	0.383143	0.731032	0.537836	0.634675	0.750228	0.849381	0.654482	0.360825	0.279158	0.267106	0.257944	0.123943	0.156626	0.221963	0.0350252	0.304125	0.338035	0.00438129	0.00982313	0.807728	0.635975	0.615144	0.936073	0.707127	0.467328	0.393564	0.355288	0.787838	0.356623	0.186442	0.202739	0.190178	0.118753	0.119873	0.0423042	0.00799005
432	393	4.029	PE(28:2p)	PE	C33 H62 O7 N1 P1	PE(28:2p)+H	D	0.743841	0.674285	0.755583	0.458281	0.362715	1.61555	0.570199	1.18115	0.753563	0.685286	1.10765	1.32959	1.05123	0.4932	0.398054	0.510863	0.418247	0.249541	0.24976	0.336106	0.0596783	0.570783	0.490669	0.00737639	0.0255618	0.781076	0.639639	1.2855	1.37654	0.995989	0.902511	0.874584	0.675904	1.23639	0.717839	0.47342	0.489828	0.377987	0.268779	0.273557	0.105369	0.00864911
433	394	5.182	PE(28:4p)	PE	C33 H58 O7 N1 P1	PE(28:4p)+(CH3CH2)3NH	D	0.159617	0	0.608927	0.0159024	0	0.244898	0.30567	0.244567	0.164746	0.151541	0.183817	0.141037	0.221644	1.78447	1.44645	0.348455	0.283932	0.124733	0.154674	0.217865	0.168383	0.385198	0.406854	0.172182	0.153554	5.13169	2.24441	0.0737848	1.70635	2.81537	0.824041	0.961797	1.72674	0.682241	0.985332	1.08569	1.17608	1.18841	0.933298	0.822612	1.6609	0.723938
434	395	5.962	PE(28:5p)	PE	C33 H56 O7 N1 P1	PE(28:5p)+(CH3CH2)3NH	D	0.819896	0.915289	0.905166	0.778165	0.549829	0.80729	0.664332	0.754721	0.749243	0.768183	1.02313	1.0817	1.14923	0.775762	0.893679	0.744929	0.725849	0.522157	0.622983	0.667086	0.246382	0.485316	0.49736	0.268627	0.319533	1.29837	1.24632	0.494161	0.689645	0.812729	0.797524	0.925355	0.758078	1.30674	0.897186	0.656798	0.622429	0.608102	0.568411	0.67267	0.540777	0.348955
435	396	5.012	PE(30:0)	PE	C35 H70 O8 N1 P1	PE(30:0)+H	D	1.30907	0.290109	0.724346	0.628934	0.438657	1.29782	0.405933	0.326813	0.0804706	0.176565	0.875478	0.251613	2.27798	0.235562	0.674762	0.348991	0.418265	0.113842	0.208075	0.124867	0.51556	0.967049	0.455335	0.81914	0.783131	7.63568	6.91532	0.383931	0.487282	2.11356	1.04705	1.69195	0.458124	1.5399	2.19408	1.19799	1.53621	0.693713	0.78884	3.73462	1.96374	1.93408
436	397	4.887	PE(31:1)	PE	C36 H70 O8 N1 P1	PE(31:1)+H	C	1.63104	0.926349	2.54831	1.08367	0.880038	1.32332	0.704287	0.738338	0.440341	0.197323	0.630204	0.251701	0.334161	0.759383	0.266733	0.197077	0.0800631	0.121811	0.244797	0.103957	0.171121	0.436422	0.127112	0.28213	0.314048	7.15165	4.62986	0.719389	1.54883	2.49772	0.660512	0.798276	0.830883	1.27125	0.565557	1.18826	0.927955	0.813461	0.290606	1.18786	0.81177	0.670816
437	398	8.114	PE(33:0)	PE	C38 H76 O8 N1 P1	PE(33:0)+(CH3CH2)3NH	D	1.20387	1.55002	1.09576	1.54799	1.617	0.813985	0.897313	0.767164	0.870576	0.813679	0.694692	0.834856	0.860265	0.712106	0.817234	0.684191	0.808858	0.663484	0.73739	0.732217	0.744022	0.707118	0.64744	0.811449	0.654783	1.40159	1.33552	1.22429	1.61965	1.32689	1.32281	1.13095	1.29363	1.0259	1.20591	1.29305	1.34483	1.23219	1.11047	1.42965	1.53327	1.32897
438	399	5.734	PE(33:0)	PE	C38 H76 O8 N1 P1	PE(33:0)+H	D	0.714326	0.756624	0.904819	0.707476	0.583271	0.57668	0.53929	0.468787	0.395151	0.573133	0.377411	0.423298	0.378634	0.24501	0.305988	0.184863	0.200951	0.132566	0.193575	0.189256	0.137235	0.252459	0.219011	0.158814	0.139039	2.70209	2.79412	1.56637	1.71783	2.04642	0.901286	1.02781	0.849683	1.46265	0.949182	0.596674	0.415231	0.542353	0.612975	0.833921	0.727123	0.512307
439	400	5.343	PE(33:1)	PE	C38 H74 O8 N1 P1	PE(33:1)+H	C	0.693028	0.436971	4.60504	0.542016	0.423135	0.474453	0.333925	0.275439	3.39367	4.23079	2.20477	0.46275	0.521569	0.302837	0.755392	0.197814	0.851953	0.150607	0.177901	0.139186	0.138253	0.0845585	0.304683	1.07784	0.198049	4.71217	3.81571	0.930353	1.58265	2.09592	0.976356	0.954061	0.96839	1.24334	1.22676	1.00651	0.925251	0.901653	0.804333	1.70742	1.28153	0.765247
440	401	4.543	PE(33:3)	PE	C38 H70 O8 N1 P1	PE(33:3)+H	D	1.79567	0.522289	2.19258	0.294038	0.21477	0.641977	0.50963	0.618471	0.372823	0.470876	0.80286	0.705183	0.710723	0.410017	0.398414	0.113759	0.107687	0.0396652	0.0638956	0.132417	0.0597366	0.160902	0.139015	0.0767425	0.150017	2.11699	2.83447	0.340849	0.922133	1.19334	0.212921	0.233863	0.36474	0.343734	0.312503	0.229696	0.230397	0.21482	0.20347	0.272623	0.216238	0.13054
441	402	5.963	PE(33:3)	PE	C38 H70 O8 N1 P1	PE(33:3)+Li	D	0.676636	0.593967	0.67769	0.691635	0.660939	0.718868	0.727606	0.640768	0.772748	0.876161	0.756657	0.801872	0.687204	0.716671	0.79779	0.491631	0.590937	0.63768	0.633049	0.611146	0.714198	0.622747	0.690394	0.692792	0.583977	0.721829	0.611093	0.513096	0.741023	0.570783	0.449353	0.753642	0.532117	0.590202	0.502407	0.535391	0.507052	0.47952	0.523036	0.536424	0.470687	0.465216
442	403	8.294	PE(34:0)	PE	C39 H78 O8 N1 P1	PE(34:0)+(CH3CH2)3NH	D	0.460964	0.479363	0.375477	0.60926	0.549106	0.567256	0.475854	0.751293	0.571701	0.718937	0.590039	0.678456	0.777541	0.825051	0.851098	1.0021	0.835122	0.590554	0.70636	0.955863	1.07073	0.634959	0.525359	0.718482	0.688605	1.94233	1.47547	1.65868	1.61065	1.5801	1.86561	2.13791	1.61536	1.83181	1.98966	1.44738	1.5525	1.66664	1.39121	1.07442	2.2721	1.69489
443	404	5.977	PE(34:0)	PE	C39 H78 O8 N1 P1	PE(34:0)+H	D	0.606567	0.740253	0.805818	0.641099	0.507761	0.456834	0.584871	0.621503	0.552446	0.703319	0.865098	0.632773	0.889572	0.627137	0.647962	0.587142	0.49472	0.375304	0.495695	0.560452	0.178321	0.415472	0.501365	0.200507	0.224378	1.32737	1.4812	0.535367	0.948873	0.957885	0.735926	0.713911	0.75968	1.91924	0.843249	0.443805	0.419409	0.558458	0.472625	0.668128	0.432637	0.314092
444	405	4.011	PE(34:3)	PE	C39 H72 O8 N1 P1	PE(34:3)+H	C	0.465536	0.46834	0.542926	0.438276	0.416125	0.394153	1.75432	0.575169	0.589506	0.985831	1.06671	0.352895	0.262169	0.299193	0.297927	0.122223	0.150812	0.0723978	0.0907706	0.176848	0.0657158	0.130139	0.133886	0.0825185	0.0314861	1.38654	0.723714	0.568209	0.392338	0.473611	0.0963386	0.078204	0.670028	0.403207	0.159438	0.0654277	0.129568	0.10038	0.0518853	0.13504	0.157754	0.03462
445	406	4.44	PE(34:4)	PE	C39 H70 O8 N1 P1	PE(34:4)+H	C	4.84734	1.44243	5.00465	1.12918	0.598477	0.75692	0.614997	0.537749	0.374288	0.602867	0.908014	0.755835	0.878696	0.503186	0.684734	0.250467	0.249604	0.191713	0.213118	0.230409	0.178695	0.34434	0.395117	0.188048	0.20795	0.125791	0.0677726	0.0798075	0.108954	0.0873415	0.0470162	0.0544077	0.0660733	0.0798773	0.0627332	0.0705073	0.0618125	0.0580816	0.0518928	0.0579385	0.0654599	0.062351
446	407	5.136	PE(34:4p)	PE	C39 H70 O7 N1 P1	PE(34:4p)+Li	D	0.8558	1.62861	1.5334	1.44635	1.20977	0.60866	1.10623	1.10618	0.881463	0.0185341	0.489019	0.471934	0.370118	0.334854	0.310516	0.20705	0.21995	0.16852	0.211785	0.294904	0.110249	0.204363	0.308246	0.118558	0.143283	0.663628	0.954421	1.48478	1.7902	1.09411	0.0276313	0.554853	0.583293	1.09479	0.629134	0.308612	0.329116	0.333866	0.302324	0.313469	0.228524	0.164364
447	408	4.141	PE(34:5)	PE	C39 H68 O8 N1 P1	PE(34:5)+H	D	5.77556	1.2586	3.76761	0.838095	0.5761	0.556757	0.640684	0.523076	0.347871	0.47909	0.557671	0.502855	0.63583	0.392427	0.419385	0.276495	0.284325	0.24163	0.339883	0.30144	0.269676	0.308227	0.46179	0.232398	0.294933	0.15132	0.154156	0.129393	0.121032	0.13375	0.162043	0.116892	0.142028	0.119262	0.122685	0.157317	0.11894	0.200926	0.116867	0.116413	0.126786	0.129724
448	409	8.178	PE(35:1)	PE	C40 H78 O8 N1 P1	PE(35:1)+(CH3CH2)3NH	D	2.54304	0.164339	2.98991	0.268758	0.181276	0.143027	0.221738	0.184693	0.245759	0.256973	0.385536	0.377487	1.75625	1.61624	0.437944	0.767499	1.6967	0.663734	0.516753	0.601957	0.975669	1.45446	0.886438	1.2365	0.823362	0.332794	0.378188	0.520709	0.286893	0.396277	1.37572	1.46133	1.06526	1.27695	1.558	1.9531	2.98727	2.26166	1.90198	2.08814	4.7517	4.29943
449	410	4.797	PE(35:4)	PE	C40 H72 O8 N1 P1	PE(35:4)+H	D	0.791353	1.54372	1.24696	1.40928	1.20952	0.43273	0.832705	0.912134	0.75761	0.863669	0.32781	0.420563	0.293799	0.297098	0.239288	0.180951	0.192652	0.181368	0.228052	0.266076	0.0677083	0.121223	0.167907	0.0613314	0.0639341	0.52849	0.656563	1.13195	1.45381	1.20869	0.642514	0.595287	0.897759	1.52384	0.897542	0.478029	0.541389	0.656125	0.613163	0.479139	0.252038	0.203994
450	411	6.643	PE(36:0)	PE	C41 H82 O8 N1 P1	PE(36:0)+H	D	0.488345	0.16354	0.273555	0.134404	0.110115	0.599132	0.346836	0.278636	0.330692	0.386328	0.40156	0.461282	0.485375	0.811581	0.709814	0.869001	0.624571	0.382244	0.498633	0.377511	0.411075	1.13269	1.01725	0.273367	0.457499	1.33688	1.18455	0.237972	0.66496	0.696464	0.554406	0.535199	0.658292	1.51532	0.533245	0.402151	0.452534	0.641976	0.47624	0.598712	0.756426	0.503543
451	412	5.801	PE(36:1)	PE	C41 H80 O8 N1 P1	PE(36:1)+H	D	1.01824	1.5911	1.28062	2.77504	0.688396	0.847819	1.24074	1.26658	1.13906	1.32621	1.19693	0.449834	1.21231	0.260552	0.14493	0.0361051	1.19411	1.21233	1.22076	1.18946	0.022172	0.0744769	0.081574	0.722836	0.0175742	0.998014	0.31974	1.54921	2.43304	0.375033	0.199112	0.168224	0.379563	4.73729	3.0717	0.369477	0.331983	0.35583	0.25835	0.23466	0.417704	0.308158
452	413	5.183	PE(36:2)	PE	C41 H78 O8 N1 P1	PE(36:2)+H	D	6.51837	10.0104	0.660798	9.20285	7.64742	0.37604	2.71901	5.67936	4.58239	2.69093	0.264019	0.266683	0.239167	1.86567	1.2689	0.353674	0.39345	0.201048	0.233579	0.268852	0.233957	0.443439	0.463009	0.208309	0.208058	17.1137	6.55351	3.26848	1.5878	3.0003	1.02332	1.24674	1.7506	13.366	1.1826	1.02115	1.39015	1.37536	1.04821	0.934259	1.30222	0.938698
453	414	4.813	PE(36:3)	PE	C41 H76 O8 N1 P1	PE(36:3)+H	C	0.332023	0.933325	1.26737	0.910664	0.704532	0.318889	0.325209	0.317963	0.220104	0.21236	0.229828	0.192913	0.332954	1.38599	1.02425	0.315103	0.27666	0.130787	0.258832	0.20719	0.152783	0.368309	0.434551	0.212953	0.185368	3.6885	1.97442	0.137343	1.58937	1.90803	0.638741	0.696774	1.04878	0.732617	0.751876	0.619232	0.833704	0.677499	0.532187	0.445455	0.793585	0.542085
454	415	4.015	PE(36:4)	PE	C41 H74 O8 N1 P1	PE(36:4)+H	C	0.521452	0.533778	0.315949	0.454852	0.450127	0.397623	1.03378	0.635612	0.658739	1.0579	0.6919	0.440286	0.466444	0.600295	0.453579	0.160743	0.348971	0.0938893	0.147603	0.444866	0.0279563	0.0934584	0.332589	0.0373946	0.0594595	1.56272	1.4265	0.461517	0.946684	0.994383	0.470137	0.342628	1.05045	0.867995	0.357135	0.364346	0.534571	0.330284	0.276055	0.386523	0.369887	0.342933
455	416	4.359	PE(36:6)	PE	C41 H70 O8 N1 P1	PE(36:6)+H	D	1.24947	2.97223	1.85145	2.21886	2.23523	0.422733	0.727415	0.791781	0.521141	0.819102	0.488589	0.498766	0.43767	0.360864	0.324938	0.290828	0.300736	0.287901	0.357012	0.406393	0.156501	0.234666	0.295672	0.138489	0.146373	0.131714	0.12155	0.117145	0.100057	0.119989	0.103896	0.10528	0.121383	0.125092	0.114925	0.118151	0.114718	0.105605	0.0955862	0.102526	0.126375	0.115376
456	417	4.34	PE(37:0e)	PE	C42 H86 O7 N1 P1	PE(37:0e)+K	D	0.125352	0.0782485	0.0855137	0.0704055	0.0648392	0.25916	0.366959	0.350046	0.413389	0.364704	0.375575	0.29483	0.251859	0.289281	0.255523	0.185039	0.204917	0.130264	0.191003	0.275734	0.104395	0.147251	0.278698	0.0694175	0.0842996	0.143412	0.121454	0.0960355	0.138018	0.115042	0.0600142	0.0535187	0.0871848	0.13959	0.079085	0.0542343	0.0643724	0.0606875	0.0436209	0.0467293	0.0359584	0.0161003
457	418	8.173	PE(37:2)	PE	C42 H80 O8 N1 P1	PE(37:2)+(CH3CH2)3NH	D	1.50428	1.79562	1.68568	1.60356	1.60888	1.31813	1.39195	1.45887	1.34402	1.31374	1.1455	1.45714	1.2327	1.15175	1.00236	0.83827	0.848201	1.03796	1.0698	0.921081	1.21287	1.03229	0.82134	1.12435	0.984674	1.45567	1.18156	1.36623	1.41232	1.28728	1.70991	1.61067	1.71414	1.34597	1.5142	1.74049	1.93135	1.85197	1.45601	1.5713	2.24471	1.92694
458	419	6.013	PE(37:2p)	PE	C42 H80 O7 N1 P1	PE(37:2p)+Li	D	0.0936218	0.0569897	0.415249	0.0519208	0.0159738	0.239074	0.178809	0.138632	0.088385	0.195926	0.153733	0.180933	0.100408	0.667595	0.433367	0.194756	0.306595	0.153441	0.0794311	0.194134	0.115265	0.214449	0.188338	0.0928827	0.0452497	3.06978	2.16299	0.25643	3.0433	1.9596	1.12886	0.870138	1.28135	1.34173	0.866249	0.859014	0.765242	1.02111	0.690961	0.698785	1.55403	0.703468
459	420	6.643	PE(37:2p)	PE	C42 H80 O7 N1 P1	PE(37:2p)+Li	D	0.487929	0.163401	0.273322	0.134289	0.110021	0.598622	0.346541	0.278399	0.33041	0.385999	0.401218	0.460889	0.484962	0.865713	0.709209	0.868261	0.624039	0.381918	0.498208	0.37719	0.410724	1.13173	1.01639	0.273135	0.45711	1.33574	1.18354	0.237769	0.664393	0.695871	0.553934	0.534743	0.657731	1.51403	0.532791	0.401808	0.452149	0.64143	0.475834	0.598202	0.755782	0.503114
460	421	4.996	PE(37:4)	PE	C42 H76 O8 N1 P1	PE(37:4)+H	D	1.62753	1.6659	1.16416	1.78577	1.6048	0.482421	0.645752	0.626193	0.584339	0.737328	0.361865	0.277323	0.234378	0.274573	0.237225	0.155226	0.162123	0.126952	0.163788	0.189308	0.0831555	0.140255	0.167441	0.0754694	0.0912594	0.601964	0.708082	0.627829	0.817126	0.632977	0.308377	0.322507	0.358565	0.513324	0.378045	0.148806	0.168566	0.190956	0.147102	0.120003	0.122722	0.0774329
461	422	4.713	PE(37:4)	PE	C42 H76 O8 N1 P1	PE(37:4)+Li	C	0	0	0.26665	0.0726326	0.124259	0.10077	0.20923	0.46876	0.510925	1.10921	0.695684	0	0.0710843	0.135583	0	0.0719401	0.0629353	0	0.0790757	0.356078	0	0.125053	0.17179	0	0	1.79375	1.63079	0.249289	0.470606	1.12916	0.12224	0.162497	1.69471	0.627255	0.149253	0.222453	0.225619	0.100209	0.0920799	0.467943	0	0
462	423	4.683	PE(37:5)	PE	C42 H74 O8 N1 P1	PE(37:5)+H	D	1.04512	2.15273	1.48203	2.06491	1.83637	0.199415	1.04578	0.153201	0.712977	0.569404	0.0891747	0.159556	0.120879	0.128337	0.0600065	0.13932	0.183711	0.153632	0.17867	0.197868	0.0340256	0.0749391	0.0931631	0.0309236	0.0311105	0.2238	0.304947	0.594045	0.604546	0.414054	0.743925	0.8137	0.54952	1.16905	0.782359	0.45472	0.465172	0.65707	0.615607	0.621876	0.338097	0.380138
463	424	4.82	PE(37:5e)	PE	C42 H76 O7 N1 P1	PE(37:5e)+Li	D	0.741827	0.0467329	1.63173	0.110415	0.000350597	0.355806	0.370758	0.389971	0.250394	0.275983	0.258554	0.310522	0.207446	1.81332	1.30652	0.213358	0.202881	0.140219	0.178775	0.142193	0.135504	0.514495	0.347671	0.241855	0.18599	4.92955	2.86912	0.155342	3.09449	2.62963	0.522367	0.966664	1.42235	1.07527	0.962357	0.688453	0.932352	1.02143	0.435732	0.505241	1.11152	0.721897
464	425	6.658	PE(38:1)	PE	C43 H84 O8 N1 P1	PE(38:1)+H	D	0.266564	0.426337	0.335769	0.333806	0.243601	0.425144	0.671932	0.66472	0.539953	0.704027	0.573218	0.506873	0.631235	0.628259	0.566014	0.765348	0.608937	0.576032	0.578091	0.689764	0.22936	0.457818	0.506536	0.237781	0.263357	0.765157	0.876459	1.83372	3.08744	2.69792	1.26358	1.16086	1.48816	3.71343	1.63248	0.927446	0.930967	1.23896	1.15655	1.10017	0.97421	0.463061
465	426	5.72	PE(38:2)	PE	C43 H82 O8 N1 P1	PE(38:2)+H	D	1.02529	1.61709	1.00687	1.37625	1.2607	0.515279	0.676471	0.609982	0.742706	0.868583	0.382941	0.317731	0.339515	0.312356	0.264734	0.412694	0.585692	0.330463	0.296437	0.377424	0.120996	0.253798	0.523993	0.139564	0.137206	0.972405	2.0163	2.371	1.70223	0.841364	0.852829	0.866478	0.966913	1.37351	1.07792	0.446103	0.740879	0.614034	0.412641	0.601447	0.531483	0.305511
466	427	5.342	PE(38:3)	PE	C43 H80 O8 N1 P1	PE(38:3)+H	D	1.20962	1.86218	1.19344	1.69031	1.57579	0.517956	0.960418	0.864343	0.867126	1.03097	0.401228	0.324762	0.291384	0.307793	0.298494	0.200449	0.234678	0.170886	0.228468	0.307871	0.0740438	0.120442	0.211341	0.0755926	0.0853199	0.584055	0.80885	0.988785	1.29348	0.921323	0.488585	0.512568	0.736625	0.901836	0.742551	0.236179	0.243289	0.277538	0.209396	0.184305	0.171851	0.110845
467	428	5.83	PE(38:3)	PE	C43 H80 O8 N1 P1	PE(38:3)+H	C	0.543276	1.03615	0.886484	0.944785	0.763301	0.602527	0.975684	1.03383	0.861846	1.19833	0.754928	0.643915	0.75924	0.622663	0.551697	0.559539	0.589953	0.476974	0.612455	0.657484	0.156922	0.339069	0.543837	0.167827	0.208438	0.714863	0.848721	0.855326	1.34856	0.999344	0.673434	0.682432	0.949151	1.10749	0.845153	0.609904	0.614082	0.725844	0.488153	0.413336	0.355397	0.257117
468	429	5.446	PE(38:4)	PE	C43 H78 O8 N1 P1	PE(38:4)+H	C	0.669546	1.41391	1.14904	1.13416	0.945734	0.672754	1.11164	1.07328	1.02637	1.15958	0.866623	0.805003	0.791362	0.730789	0.571603	0.533617	0.514866	0.438247	0.533719	0.70432	0.142232	0.319964	0.381199	0.13683	0.174015	0.512962	0.635669	0.742481	0.983012	0.737833	0.694437	0.619876	0.851	1.12089	0.769584	0.474348	0.534807	0.603386	0.515207	0.457653	0.314025	0.213124
469	430	4.762	PE(38:7p)	PE	C43 H72 O7 N1 P1	PE(38:7p)+Li	D	0.793768	1.65299	1.36243	1.67039	2.16439	0.323845	0.557624	0.52039	0.600495	0.83914	0.0749071	0.314778	0.126993	0.384739	0.14449	0.384848	0.550005	0.456478	0.406507	0.579083	0.028705	0.155563	0.227383	0.0422356	0.0887395	0.58781	0.816852	1.58227	1.5018	1.14559	2.02171	2.1504	1.5272	3.30544	1.96939	1.24509	1.31133	1.82606	1.65879	1.55632	0.851118	0.617523
470	431	8.925	PE(39:0)	PE	C44 H88 O8 N1 P1	PE(39:0)+(CH3CH2)3NH	D	1.01385	0.817284	1.44383	0.688554	1.16966	1.01849	0.891753	0.892172	1.16338	3.341	0.744657	0.796396	0.823901	0.76154	0.779534	1.42384	0.751768	0.903203	0.559913	0.501381	1.6681	0.681725	1.1022	1.07313	1.04296	1.0649	0.743673	1.27272	0.706008	0.834094	0.736988	0.758447	0.729108	0.963032	0.603459	0.646642	1.26401	1.08303	1.16157	3.48133	0.650889	1.20804
471	432	7.691	PE(39:5)	PE	C44 H78 O8 N1 P1	PE(39:5)+(CH3CH2)3NH	D	3.3054	3.59975	3.7747	2.96344	3.49143	1.26492	1.52089	1.44187	1.37311	1.35891	0.666051	0.980733	1.05809	0.755755	0.909033	0.588398	0.595042	0.666313	0.788519	0.541331	0.634713	0.903443	0.823255	0.708835	0.812537	0.0469603	0.0882286	0.18092	0.0563981	0.081889	0.0136885	0.00601503	0.00405439	0.0149114	0.00409489	0	0.00806673	0.00455266	0.0142798	0.0218664	0.00341893	0.0170959
472	433	9.124	PE(40:0)	PE	C45 H90 O8 N1 P1	PE(40:0)+(CH3CH2)3NH	D	1.39357	1.62368	1.61887	1.87644	0.832424	1.5752	1.5146	1.58695	1.53315	1.48451	1.3839	1.48932	1.17852	1.26998	1.15149	0.943171	1.14462	1.16514	1.21344	1.29615	1.05137	0.597742	0.801725	1.0772	1.10626	1.40372	1.62877	1.4049	1.78234	1.69438	1.36742	1.38664	1.2174	0.962302	1.26429	1.05908	0.717648	1.17547	1.19836	0.649659	1.04688	1.1852
473	434	7.291	PE(40:0)	PE	C45 H90 O8 N1 P1	PE(40:0)+H	D	0.343617	0.688879	0.822814	1.12284	0.379757	0.345748	0.52096	0.40114	0.410625	0.537915	0.326565	0.508467	0.247322	0.157349	0.313464	0.243605	0.243202	0.0279966	0.513215	0.256029	0.0201197	0.377424	0.197379	0.0825372	0.0426638	1.7154	2.83641	0.869004	1.65697	1.7435	1.0271	0.675151	0.655728	1.43158	0.651771	0.236228	0.846625	0.471111	0.166348	0.660067	0.267115	0.148619
474	435	7.055	PE(40:1)	PE	C45 H88 O8 N1 P1	PE(40:1)+H	C	0.995356	1.3767	1.88675	1.16759	0.68116	0.437754	0.554494	0.563741	0.408604	0.495155	0.54286	0.404156	0.480275	0.287648	0.394827	0.274613	0.258192	0.195185	0.234302	0.268722	0.0727022	0.246206	0.261495	0.12003	0.12759	2.59186	2.22924	0.284983	1.0167	1.38044	0.40894	0.387885	0.281138	1.12754	0.295515	0.303612	0.330956	0.320258	0.316071	0.0764919	0.268491	0.154566
475	436	4.341	PE(40:4)	PE	C45 H82 O8 N1 P1	PE(40:4)+K	C	1.09485	1.01241	0.928647	0.862657	0.948158	1.09602	0.97089	0.96641	0.964792	1.00214	1.2865	1.14154	0.95918	0.955375	0.878019	1.11287	1.11577	0.970167	0.95743	0.97853	1.11695	1.13996	1.10769	1.00142	0.969014	1.14767	1.04926	0.919588	0.819381	0.854156	1.04465	0.997269	0.987462	1.01109	0.921781	1.15295	1.08533	0.982849	0.921222	0.863589	1.14535	1.0303
476	437	8.882	PE(41:6e)	PE	C46 H82 O7 N1 P1	PE(41:6e)+(CH3CH2)3NH	D	1.3171	1.37396	1.42045	1.56667	1.50553	1.55372	1.39395	1.40598	1.26142	1.16728	1.07694	1.34616	0.985245	1.0849	1.0485	0.888974	1.09007	1.0857	1.00972	0.965889	1.06739	0.851089	0.62086	1.14914	0.909839	1.88253	1.24543	1.46603	1.59476	1.58633	1.56784	1.33962	1.19734	1.23497	1.47085	0.60061	1.45568	0.886393	1.35331	1.10637	1.37966	1.58904
477	438	8.618	PE(41:6p)	PE	C46 H80 O7 N1 P1	PE(41:6p)+(CH3CH2)3NH	D	1.16949	1.1418	1.13969	1.21565	1.18429	0.507318	1.24111	1.19684	1.31724	0.938126	1.16905	1.26654	1.06837	1.10686	0.50398	0.921075	1.00678	1.09001	0.946069	0.9387	1.60274	1.01872	0.931097	1.05348	1.11897	1.09341	1.13409	1.17609	1.19012	1.26557	1.26437	1.29177	0.892475	1.17224	1.14192	1.36235	1.20327	1.20108	1.13419	1.15237	1.52055	1.23903
478	439	6.881	PE(41:7)	PE	C46 H78 O8 N1 P1	PE(41:7)+(CH3CH2)3NH	D	0.309207	0.299444	0.279913	0.275272	0.232934	0.489022	0.478094	0.663765	0.662581	0.590346	0.561092	0.548646	0.51567	0.470039	0.660025	0.390941	0.415505	0.371123	0.394299	0.408679	0.309681	0.426913	0.499941	0.249677	0.286914	0.320081	0.251746	0.189543	0.23988	0.266225	0.156754	0.185194	0.266722	0.232993	0.18423	0.17742	0.157348	0.153769	0.140594	0.146907	0.135473	0.102387
479	440	7.435	PE(42:1)	PE	C47 H92 O8 N1 P1	PE(42:1)+H	D	0.503242	1.00991	1.01591	0.76572	0.651221	0.547585	0.8492	0.862673	0.701058	0.908966	0.593314	0.561091	0.523717	0.452718	0.446465	0.471061	0.422938	0.382482	0.421331	0.500445	0.223006	0.500477	0.606382	0.241042	0.246345	0.945786	1.39112	0.86589	1.38016	1.03101	0.511503	0.563285	0.841897	1.06168	0.760331	0.46093	0.481389	0.466301	0.404138	0.282969	0.349048	0.234236
480	441	7.998	PE(42:1e)	PE	C47 H94 O7 N1 P1	PE(42:1e)+H	D	0.459501	0.583563	0.566486	0.508548	0.447008	0.468653	0.466457	0.527622	0.546105	0.537484	0.705128	0.640776	0.759502	0.733452	0.658964	0.77611	0.712536	0.594237	0.711796	0.734033	0.690326	1.05628	1.15789	0.777232	0.780311	0.97567	0.95091	0.895488	1.10611	0.996791	0.880337	0.964183	1.77954	1.29814	1.04831	1.35416	1.35108	1.59564	1.05312	0.85004	1.4086	0.936973
481	442	7.127	PE(42:2)	PE	C47 H90 O8 N1 P1	PE(42:2)+H	D	0.518486	0.995948	0.991111	0.982971	0.64985	0.486087	0.855657	0.911617	0.715522	0.923679	0.567612	0.514021	0.489683	0.459023	0.418825	0.447764	0.392438	0.307404	0.429022	0.456783	0.218633	0.375233	0.423847	0.178051	0.208765	0.705725	1.05732	0.776203	1.13299	0.850568	0.57805	0.623467	0.77983	1.35198	0.806687	0.370525	0.422508	0.502132	0.437688	0.31244	0.30229	0.227302
482	443	10.324	PE(42:7e)	PE	C47 H82 O7 N1 P1	PE(42:7e)+(CH3CH2)3NH	D	0	1.26979	0.441497	0.0794616	1.02202	0	0.849952	0.768856	0.0668359	1.51071	0.792718	0	2.78764	0.912839	2.4005	0	0.97199	1.01674	0	0.395781	2.92063	1.62923	0	0.0341332	0	0	3.06781	0	0	0	0.469638	0	0.0230707	0.0827682	0	0	1.82647	0.419795	1.69813	0.0122403	0	1.71768
483	444	8.239	PE(42:8p)	PE	C47 H78 O7 N1 P1	PE(42:8p)+(CH3CH2)3NH	D	1.79984	0.632806	1.72129	1.75812	1.80504	1.62501	1.44824	1.36307	1.34074	1.2468	1.56052	1.38239	1.42455	1.20229	1.01575	1.13158	1.12535	1.30824	1.17865	0.991425	1.40369	1.38498	1.06365	1.69623	1.12545	0.461054	0.45985	0.624196	0.263202	0.343829	0.163821	0.166967	0.128153	0.0919812	0.122064	0.128891	0.134216	0.130758	0.133533	0.123267	0.150998	0.142172
484	445	5.976	PE(43:2)	PE	C48 H92 O8 N1 P1	PE(43:2)+Li	C	0.911184	0.695383	0.602729	0.694804	0.741825	0.726948	0.70376	0.619637	0.757752	0.8141	0.808786	0.748804	0.781203	0.840527	0.795804	0.587745	0.656279	0.657781	0.631815	0.608199	0.784302	0.823029	0.737122	0.754996	0.644838	0.892886	0.631105	0.537542	0.679933	0.598395	0.734777	0.755304	0.620015	0.556001	0.526943	0.764463	0.701441	0.777935	0.87805	0.705819	0.636097	0.717911
485	446	5.798	PE(44:2p)	PE	C49 H94 O7 N1 P1	PE(44:2p)+K	D	3.06962	0.436134	0.0170737	1.8552	1.27629	0.890568	0	0.431767	0.605739	1.06013	0	0.739465	0	0.654848	0.367303	0	0	0.715047	0	0.303645	0	0.0130991	0.391095	1.31081	0.259192	4.0384	1.75778	1.00165	0.662863	1.41259	1.31362	0.952978	0.384915	0	0	0.733204	0.712275	2.56417	0	0.00822166	3.56331	1.25296
486	447	4.009	PE(49:10)	PE	C54 H88 O8 N1 P1	PE(49:10)+(CH3CH2)3NH	D	0.0978536	0.190096	0.153601	0.137415	0.0679424	0.542234	0.256061	0.558993	0.352165	0.412215	0.492638	0.429732	0.345348	0.285399	0.196371	0.182574	0.153981	0.0679911	0.0964771	0.13027	0.0389598	0.261395	0.334382	0.0145235	0.0229133	0.72914	0.755081	0.697721	1.37572	1.11455	0.615494	0.59008	0.684949	1.83483	0.598264	0.254918	0.379662	0.328882	0.159133	0.146067	0.12765	0.0293961
487	448	3.834	PE(49:11)	PE	C54 H86 O8 N1 P1	PE(49:11)+(CH3CH2)3NH	D	0.345055	0.523949	0.565126	0.585521	0.52447	0.180794	0.303101	0.508982	0.431851	0.382308	0.441814	0.215347	0.382996	0.414206	0.388796	0.614622	0.651925	0.488862	0.589924	0.388283	0.609921	1.25377	1.43994	0.826366	0.726154	0.571609	0.3623	0.248202	0.5538	0.613623	0.592379	0.677665	0.897876	1.05603	0.748718	1.1337	1.01315	1.17184	0.897864	0.977025	1.76172	1.36261
488	449	7.874	PE(50:2)	PE	C55 H106 O8 N1 P1	PE(50:2)+H	D	0.371778	0.251389	0.23055	0.263964	0.222198	0.542802	0.737183	0.592659	0.723534	0.696521	1.16448	0.69891	0.808831	0.740754	0.770432	0.804686	0.929164	0.489323	0.615266	0.812732	0.634728	0.727163	0.91316	0.489448	0.577983	0.383269	0.355973	0.241033	0.165594	0.122425	0.146005	0.0951554	0.358499	0.0969725	0.369544	0.240463	0.187755	0.0959202	0.313121	0.348186	0.189513	0.177767
489	450	5.386	PE(51:1)	PE	C56 H110 O8 N1 P1	PE(51:1)+K	D	0.0532185	0	0.0355116	0.0496553	0	0.237805	0.550197	0.324907	0.108526	0.924017	3.51413	0.700225	0.62495	4.44471	3.53282	1.3428	1.56528	0.0531794	0.443481	1.12953	0.784976	0.362072	0.467535	0.617533	0.271746	0.600125	0.235388	0	0	0	0.0857687	0.0637539	0.155092	0.120577	0.157265	0.111874	0.0753855	0.0591934	0.0802216	0.121747	0.135171	0.0376533
490	451	7.446	PE(51:4)	PE	C56 H104 O8 N1 P1	PE(51:4)+Li	C	0.333821	0.331351	0.235262	0.295891	0.196081	0.543513	0.986258	0.656393	0.640044	1.27356	1.7435	0.45459	0.425968	1.02677	0.873836	0.5995	0.89193	0.195387	0.315417	0.792622	0.20097	0.576832	0.629137	0.190696	0.267683	0.724847	0.704273	0.244986	0.360842	0.418028	0.214633	0.390238	0.776759	0.416171	0.311141	0.26201	0.572848	0.2742	0.262615	0.482784	0.209162	0.133893
491	452	7.533	PE(53:0)	PE	C58 H116 O8 N1 P1	PE(53:0)+K	C	1.26078	1.29121	1.39376	1.11973	1.14664	1.13237	1.13732	1.02126	0.866881	0.887835	0.99143	1.00905	0.931042	0.848987	0.864123	0.935549	1.05246	0.996066	0.989139	0.852462	1.16839	1.1987	1.1043	0.998327	0.865695	0.998039	1.09979	1.18117	0.941843	0.85965	0.982528	1.02308	0.889223	0.901396	0.952052	1.02463	1.07116	1.08709	0.959487	0.94417	1.25729	1.12761
492	453	5.212	PG(16:0/18:1)	PG	C40 H77 O10 N0 P1	PG(16:0/18:1)+H	B	1.48084	1.46586	1.52146	1.66876	1.31073	1.17451	1.30947	1.53362	1.43818	1.58717	0.869115	0.871624	0.769438	0.816913	0.716155	0.451289	0.648734	0.599594	0.485818	0.664482	0.306975	0.351367	0.69774	0.271678	0.278537	0.322403	0.60481	0.565172	0.270525	0.401968	0.221668	0.445594	0.235394	0.259164	0.343085	0.293821	0.177893	0.349908	0.194924	0.198391	0.110279	0.182115
493	454	4.855	PG(16:0/18:2)	PG	C40 H75 O10 N0 P1	PG(16:0/18:2)+H	B	1.33162	1.36569	1.76881	0.507323	0.930898	1.19085	1.28921	1.77108	1.29513	1.72963	1.06833	1.08295	0.819127	0.85294	0.590451	0.662172	0.614578	0.417738	0.489644	0.483384	0.235757	0.314878	0.57978	0.155004	0.173674	0.517104	0.607386	0.531798	0.64653	0.598327	0.648335	0.428766	0.304713	0.896791	0.500319	0.250133	0.357961	0.18519	0.32951	0.248835	0.245786	0.220317
494	455	5.231	PG(18:0/18:0)	PG	C42 H83 O10 N0 P1	PG(18:0/18:0)+Li	B	0.537349	0.933172	0.705724	0.783211	0.70907	0.70458	1.08	1.09882	1.08827	1.12258	0.921044	0.796804	0.837165	0.788075	0.715501	0.906589	0.885176	0.89399	0.951611	1.04581	0.371613	0.666939	1.03141	0.403007	0.444471	0.759067	0.96247	1.12694	1.25253	1.05211	0.817165	0.854981	1.06817	1.02309	0.935805	0.818457	0.852243	0.871349	0.669834	0.545408	0.538998	0.511891
495	456	4.525	PG(18:2/18:2)	PG	C42 H75 O10 N0 P1	PG(18:2/18:2)+H	B	1.62827	0.147423	1.77098	2.11357	0.0796481	1.68486	0.775641	1.14968	0.697576	1.45878	1.09905	0.87127	0.582035	0.729248	0.769046	0.197991	0.202431	0.0856122	0.145993	0.197315	0.00988596	0.161804	0.308124	0.130312	0.0970335	0.226022	0.266445	0.119301	0.198972	0.190692	0.0832035	0.155077	0.240096	0.272744	0.176926	0.208757	0.159913	0.17641	0.116282	0.0807073	0.155028	0.130455
496	457	3.504	PG(26:1p)	PG	C32 H61 O9 N0 P1	PG(26:1p)+H	C	0.244498	0.156194	0.267022	0.0817844	0.0485912	1.11909	0.22048	0.665024	0.370679	0.859215	1.32071	0.951584	0.666416	0.363168	0.28583	0.309202	0.232843	0.0929941	0.122233	0.120168	0.0389277	0.294388	0.400789	0.0110748	0.0143223	0.551382	0.34079	0.0663432	0.285091	0.238067	0.0320685	0.0432781	0.0656472	0.0788029	0.0246804	0.0119844	0.0298408	0.0116072	0.0074952	0.0127749	0.00764848	0.000685787
497	458	4.57	PG(29:2)	PG	C35 H65 O10 N0 P1	PG(29:2)+(CH3CH2)3NH	C	0.976654	0.931761	0.863166	0.726027	0.900016	0.77428	0.963168	0.923449	0.872528	0.982385	0.945109	0.907828	0.937729	0.834053	0.767321	0.997939	0.876684	0.798453	0.798821	0.94113	0.861896	0.960391	0.882519	0.836036	0.796303	1.02831	1.00887	0.759202	0.955648	0.823568	0.893093	0.921821	0.903553	0.880082	0.765316	0.937616	0.879026	0.847435	0.822463	0.769419	0.958176	0.911603
498	459	4.282	PG(33:2)	PG	C39 H73 O10 N0 P1	PG(33:2)+NH4	C	0.152546	0.151008	0.139377	0.0591364	0.0490817	0.248382	0.447038	0.531909	0.416229	0.430985	0.419877	0.350899	0.252887	0.197666	0.197585	0.0838291	0.088429	0.0946819	0.104721	0.342857	0.0655696	0.153691	0.126447	0.0311496	0.0403619	0.282925	0.219001	0.276246	0.385857	0.161941	0.0334895	0.0467947	0.144885	0.234018	0.0740965	0.0246572	0.0927254	0.0465011	0.0205981	0.0415876	0.0207731	0.00660884
499	460	4.02	PG(33:3)	PG	C39 H71 O10 N0 P1	PG(33:3)+NH4	C	0.48759	0.27922	0.333864	0.257984	0.254589	0.263593	0.2549	0.294562	0.592808	0.666042	0.376428	0.207795	0.236978	0.0981833	0.138999	0.0669875	0.195752	0.0204334	0.0836887	0.0978451	0.0100218	0.0492074	0.071686	0.0256825	0.0253544	0.216481	0.245183	0.171413	0.291006	0.26793	0.0535675	0.0603512	0.112493	0.196515	0.0991514	0.00902766	0.0353787	0.0090485	0.013953	0.0178538	0.0279745	0.00306936
500	461	3.771	PG(33:4)	PG	C39 H69 O10 N0 P1	PG(33:4)+NH4	C	0.286229	0.455125	0.345365	0.397038	0.31025	0.419944	1.33274	0.821969	0.706374	1.47816	0.785757	0.541269	0.195784	0.549719	0.456024	0.130053	0.277282	0.0405496	0.0774365	0.388338	0.0450723	0.081014	0.166623	0.0400413	0.0491869	0.883546	0.981151	0.2748	0.891622	0.68522	0.141802	0.185624	0.410198	0.422971	0.211162	0.121296	0.167093	0.136042	0.0759769	0.14184	0.102597	0.0527009
501	462	4.582	PG(33:4)	PG	C39 H69 O10 N0 P1	PG(33:4)+NH4	C	0.728545	1.28318	0.970107	1.30995	1.22183	0.529773	1.34006	1.12047	0.950243	0.831705	0.391031	0.294317	0.240772	0.295575	0.225402	0.169889	0.177903	0.161198	0.213533	0.266462	0.117861	0.221674	0.349299	0.120423	0.12698	0.417328	0.811325	1.21634	1.13191	1.07853	0.517377	0.549836	0.83824	0.897712	0.736208	0.581546	0.4474	0.58068	0.514496	0.340433	0.389431	0.317818
502	463	4.501	PG(34:5)	PG	C40 H69 O10 N0 P1	PG(34:5)+NH4	C	1.01202	2.25458	1.37344	1.8271	2.06385	0.443214	1.15222	1.00794	0.774651	0.655826	0.523684	0.431092	0.375522	0.353126	0.333179	0.272784	0.263556	0.243802	0.327944	0.420385	0.148346	0.30537	0.452343	0.126353	0.152082	0.112137	0.0709468	0.15755	0.320552	0.220768	0.21162	0.204122	0.294334	0.413335	0.23183	0.0952691	0.167496	0.161153	0.0803228	0.0722541	0.115623	0.107113
503	464	5.02	PG(35:0)	PG	C41 H81 O10 N0 P1	PG(35:0)+Li	C	0.39815	0.738767	0.805954	0.674664	0.689078	0.504074	0.754193	0.942596	0.800547	0.954937	0.445386	0.414718	0.328001	0.380001	0.308217	0.290551	0.30871	0.262965	0.345003	0.412018	0.106496	0.229494	0.375046	0.107328	0.122636	0.953759	1.34472	1.76516	2.09249	1.45263	0.895192	0.913118	1.21845	1.56757	1.17449	0.65902	0.696212	0.830053	0.669161	0.543227	0.430074	0.382763
504	465	3.785	PG(35:5)	PG	C41 H71 O10 N0 P1	PG(35:5)+NH4	C	0.27968	0.307698	0.276019	0.24397	0.198041	0.309724	0.734524	0.63934	0.316853	0.996398	0.302844	0.304623	0.126804	0.302274	0.271311	0.0741068	0.108683	0.0617616	0.0648119	0.272742	0.0169424	0.0399089	0.141909	0.0283999	0.0191583	0.554452	0.549891	0.206549	0.45928	0.375041	0.113985	0.0766208	0.372614	0.149467	0.192157	0.0369749	0.149553	0.0970269	0.0392535	0.149119	0.0968973	0.0295373
505	466	4.535	PG(36:2)	PG	C42 H79 O10 N0 P1	PG(36:2)+Li	C	1.11645	2.59214	1.58811	2.0895	2.29964	0.382305	0.868855	0.94622	0.683132	0.911313	0.391984	0.384141	0.330809	0.268166	0.23346	0.189641	0.204873	0.223089	0.245013	0.361131	0.0617536	0.104204	0.177238	0.0550764	0.0585254	0.0286708	0.0484164	0.0573304	0.090546	0.0530074	0.0278311	0.0271791	0.0415982	0.0589643	0.0364564	0.0240508	0.0248356	0.0293106	0.0200745	0.0156902	0.0155672	0.0140185
506	467	5.855	PG(39:0)	PG	C45 H89 O10 N0 P1	PG(39:0)+(CH3CH2)3NH	C	0.259219	0.187722	0.17314	0.170103	0.160974	0.461492	0.954634	0.316299	0.52503	0.884587	2.48327	1.01338	0.613109	1.13107	1.04951	0.616975	0.770085	0.300971	0.382048	0.79121	0.146461	0.503994	0.530876	0.0889532	0.36739	0.170906	0.0842778	0.0700449	0.248875	0.204012	0.0604019	0.237769	0.652353	0.171178	0.273944	0.230135	0.111014	0.176726	0.201959	0.210978	0.259721	0.114873
507	468	5.881	PG(41:1)	PG	C47 H91 O10 N0 P1	PG(41:1)+(CH3CH2)3NH	C	0.110411	0.219145	0.087784	0.277751	0.162303	0.744146	0.37088	0.545231	0.579923	1.11608	2.97967	1.00401	0.637999	1.23028	1.00994	0.65368	0.846635	0.283757	0.372522	0.921144	0.372578	0.548382	0.610703	0.121232	0.156	0.569827	0.161079	0.0945801	0.188046	0.0539009	0.14625	0.206447	0.560716	0.167508	0.202051	0.243262	0.44365	0.102442	0.233597	0.232296	0.244097	0.0671791
508	469	5.153	PG(41:3)	PG	C47 H87 O10 N0 P1	PG(41:3)+(CH3CH2)3NH	C	0.288234	0.286617	0.256252	0.219387	0.158391	0.730571	1.27828	0.613912	0.638991	1.74397	2.42763	0.531183	0.479323	1.49222	1.08579	0.51633	0.811445	0.207629	0.283252	0.976613	0.420107	0.797695	0.766632	0.41235	0.416121	0.341462	0.530125	0.299572	0.401183	0.314451	0.328857	0.490711	0.861262	0.545524	0.434827	0.556608	1.03137	1.15713	0.515435	0.516815	0.691354	0.523316
509	470	6.235	PG(41:3)	PG	C47 H87 O10 N0 P1	PG(41:3)+(CH3CH2)3NH	C	0.677951	0.399318	0.693762	0.508561	0.442361	0.437134	1.21766	0.849759	0.746909	1.44335	1.08654	0.341138	0.444062	0.482197	0.535647	0.388414	0.387866	0.37693	0.363669	0.570502	0.256929	0.385318	0.42048	0.157251	0.32608	0.259291	0.138437	0.0974626	0.311227	0.309646	0.114722	0.190611	0.347233	0.164012	0.110453	0.28735	0.250534	0.30924	0.258951	0.0756417	0.258502	0.192105
510	471	9.393	PG(50:2)	PG	C56 H107 O10 N0 P1	PG(50:2)+Li	C	3.07905	0.00728596	3.78085	0.00956474	3.37303	0.00895798	2.98425	2.06866	3.81139	1.70427	1.77652	1.96666	1.37469	1.50256	2.27626	1.37273	2.01541	1.73274	1.48985	1.87427	1.16929	0.0117252	0.845387	1.18595	1.10606	1.61264	1.2999	0.00631539	0.0217205	2.31581	1.71688	0.0140567	1.26971	0.010758	1.216	0.00744023	0.0118408	1.17601	0.00395703	0.00878188	0.0226618	2.21735
511	472	3.833	PG(51:2)	PG	C57 H109 O10 N0 P1	PG(51:2)+K	C	0.309812	0.482396	0.519522	0.528605	0.463521	0.152741	0.273108	0.362319	0.239776	0.342261	0.239387	0.187681	0.234259	0.396381	0.357269	0.558387	0.598546	0.446839	0.54378	0.390523	0.551904	1.09771	1.28914	0.751019	0.640176	0.470781	0.33998	0.231744	0.366628	0.542899	0.530989	0.623881	0.825201	0.750356	0.688345	1.04472	0.905714	1.07926	0.802297	0.89963	1.61811	1.23207
512	473	5.081	PI(16:0/18:1)	PI	C43 H81 O13 N0 P1	PI(16:0/18:1)+H	B	0.408417	0.580858	0.502626	0.592037	0.530662	0.742617	1.03691	1.1201	1.00259	0.649939	0.840384	0.740011	0.715293	0.909827	0.759807	1.2017	1.01659	0.972589	1.13626	1.02307	0.923071	1.17905	1.38895	0.859968	0.978503	0.665968	0.978894	1.1982	1.05085	1.09725	1.26091	1.18723	1.53246	1.45666	1.50073	1.30938	1.41855	1.29549	1.16646	1.13505	1.08801	0.904144
513	474	4.716	PI(16:0/18:2)	PI	C43 H79 O13 N0 P1	PI(16:0/18:2)+H	B	0.623172	1.10745	0.909489	1.04924	0.867809	0.724747	1.25605	1.26423	1.01105	0.727458	0.820381	0.691103	0.579347	0.750349	0.65655	0.600621	0.475135	0.460128	0.38645	0.717395	0.289767	0.448294	0.677856	0.244185	0.369146	0.551156	0.957526	1.02938	1.02975	1.03434	0.832056	0.76737	1.21423	1.28361	1.13106	0.826375	0.954	0.910969	0.849089	0.665029	0.56629	0.38653
514	475	4.412	PI(18:2/18:2)	PI	C45 H79 O13 N0 P1	PI(18:2/18:2)+H	B	1.48406	2.33361	1.88745	2.30821	1.82765	0.619885	1.22586	1.14153	0.921882	0.766151	0.556983	0.451242	0.377721	0.441838	0.390126	0.308187	0.294151	0.251791	0.306549	0.373421	0.152164	0.266949	0.382327	0.134331	0.160748	0.444881	0.712109	0.72916	0.974014	0.689427	0.285867	0.271812	0.4097	0.538452	0.392414	0.224407	0.264554	0.236107	0.209704	0.154535	0.130659	0.0991141
515	476	4.422	PI(34:3)	PI	C43 H77 O13 N0 P1	PI(34:3)+H	C	1.52048	2.26326	1.87993	2.10941	1.91869	0.78162	1.28184	1.30725	0.882996	0.838492	0.744847	0.772009	0.588158	0.591583	0.60352	0.643693	0.538454	0.520089	0.561441	0.657965	0.430435	0.563534	0.69381	0.344034	0.357154	0.249008	0.261724	0.283135	0.282874	0.327262	0.255149	0.28971	0.377449	0.329017	0.239253	0.311811	0.327588	0.242639	0.210277	0.208423	0.22042	0.255084
516	477	4.949	PI(35:2)	PI	C44 H81 O13 N0 P1	PI(35:2)+H	C	0.596579	0.972958	1.12811	1.18954	0.929622	0.481419	0.744304	0.658024	0.472915	0.314647	0.255122	0.273343	0.189374	0.21874	0.219948	0.16846	0.169937	0.162619	0.145969	0.17156	0.0994153	0.143489	0.221053	0.0953239	0.109086	1.41686	2.27614	2.38749	2.06309	2.13751	1.40307	1.37035	1.11385	2.64394	1.57316	0.705118	0.716811	0.89669	1.00667	1.07163	0.609394	0.559094
517	478	5.179	PI(36:2)	PI	C45 H83 O13 N0 P1	PI(36:2)+H	C	0.780107	1.24233	1.26884	1.34886	1.15021	0.790657	1.12568	1.1829	0.973411	0.603282	0.736852	0.658653	0.659448	0.764101	0.59493	0.903137	0.668586	0.594912	1.10435	0.834559	0.584672	0.877935	1.12689	0.523276	0.699363	0.669833	0.807223	0.865127	0.694148	0.809258	0.916358	0.895148	0.879185	1.33045	1.11044	0.770178	0.893877	0.853739	0.88441	0.840751	0.585712	0.521208
518	479	4.747	PI(36:3)	PI	C45 H81 O13 N0 P1	PI(36:3)+H	C	0.749784	1.30393	1.11586	1.31986	1.03602	0.695208	1.14574	1.15294	1.02389	0.729095	0.637709	0.545683	0.528639	0.656464	0.566489	0.759833	0.732045	0.646074	0.696006	0.757966	0.324736	0.876425	1.27714	0.411628	0.606114	0.70858	0.9568	1.0123	1.12053	1.0234	0.640805	0.635001	0.837056	0.92638	0.911173	0.624782	0.769266	0.697006	0.568506	0.418056	0.321107	0.316038
519	480	4.006	PI(38:3)	PI	C47 H85 O13 N0 P1	PI(38:3)+K	C	0.298949	0.363573	0.342425	0.280832	0.212289	0.531783	0.715125	0.640255	0.60603	0.417181	1.07069	0.525469	0.569478	0.834781	0.709975	0.488113	0.184514	0.118474	0.381345	0.127572	0.0879643	0.488468	0.734037	0.288695	0.191556	0.99098	2.45293	0.68895	1.51959	1.21144	0.311628	0.374235	0.959236	0.56938	0.538727	0.776559	0.793344	0.647178	0.436138	0.119311	0.687439	0.10886
520	481	3.742	PI(38:4)	PI	C47 H83 O13 N0 P1	PI(38:4)+K	C	0.349195	0.35588	0.308945	0.251484	0.184831	0.428938	0.676203	0.69089	0.580093	0.575358	1.09766	0.567959	0.795808	1.22998	0.693674	0.586956	0.495193	0.387632	0.479316	0.732816	0.490376	0.936702	0.993534	0.472697	0.660069	0.657805	2.45483	0.500149	1.19874	1.00202	0.369073	0.471606	0.795026	0.987672	0.548639	1.27369	1.17992	1.12527	0.644626	0.342501	1.20665	0.465636
521	482	4.114	PI(38:4)	PI	C47 H83 O13 N0 P1	PI(38:4)+K	C	0.298137	0.537248	0.446218	0.50014	0.354779	0.334549	0.914937	0.948187	0.684345	0.502708	0.697132	0.3898	0.526225	0.713656	0.554783	0.562703	0.498029	0.487162	0.615561	0.767898	0.568026	0.675241	1.03348	0.444205	0.480341	0.547972	0.574042	0.232011	0.454565	0.411736	0.526557	0.407495	1.59992	1.34318	1.04142	1.61306	1.17363	1.25207	0.924709	0.497431	1.41276	0.769727
522	483	6.616	PIP(52:3)	PIP	C61 H114 O16 N0 P2	PIP(52:3)+H	C	0.138188	0.0707707	0.066746	0.0611073	0.109248	0.411507	0.558277	0.474113	0.408895	0.31704	0.65311	0.352943	0.694892	0.95005	0.650102	0.657014	0.364977	0.422104	0.357491	0.573313	0.626067	0.464307	0.671702	0.357047	0.433552	0.839682	1.11231	0.214778	0.200861	0.483646	0.459231	0.442691	0.789948	0.581183	0.797938	1.01723	0.776816	1.02702	0.507493	0.454234	0.849969	0.433097
523	484	6.318	PIP(52:4)	PIP	C61 H112 O16 N0 P2	PIP(52:4)+H	C	0.0877419	0.125119	0.246753	0.0196119	0.0337003	0.705098	0.643723	0.544662	0.538449	0.573477	0.750953	0.349067	0.34052	0.97791	0.525045	0.443715	0.310925	0.339593	0.43923	0.507446	0.481477	0.829433	0.919596	0.429101	0.558345	0.765815	0.992403	0.0466897	0.634395	0.765151	0.470789	0.443786	1.0051	0.851952	0.535092	1.05966	1.15834	0.938433	0.69306	0.407489	1.37112	0.675702
524	485	6.593	PIP(54:4)	PIP	C63 H116 O16 N0 P2	PIP(54:4)+H	C	0.228805	0.315901	0.279475	0.198204	0.117639	0.383059	0.255103	0.331122	0.544204	0.371058	1.38081	0.324832	0.741571	1.12606	0.593996	0.826323	0.283167	0.337152	0.69419	0.448818	0.48939	0.738303	0.768002	0.490572	0.521001	1.86922	1.18776	0.309914	0.510186	0.791112	0.351541	0.427437	0.691681	0.530673	0.420833	0.678061	0.841903	0.501437	0.392947	0.373358	0.511705	0.390936
525	486	6.258	PIP(54:5)	PIP	C63 H114 O16 N0 P2	PIP(54:5)+H	C	0.557823	0.29075	0.41339	0.169813	0.158015	0.663049	0.509833	0.347669	0.293275	0.537634	0.796824	0.428541	1.10135	0.646721	0.475214	0.816148	0.852011	0.304607	0.8726	0.943584	0.634226	0.79379	1.0364	0.566242	0.52556	1.59822	2.1246	0.393167	0.876549	0.885352	0.765182	0.753052	0.638299	0.577261	1.01159	2.18325	2.07591	1.43745	0.873929	0.916561	2.38086	0.878707
526	487	5.998	PIP(54:6)	PIP	C63 H112 O16 N0 P2	PIP(54:6)+H	C	0.236604	0.328075	0.33601	0.1646	0.108967	0.246736	0.874542	0.64878	0.309009	0.833729	0.612044	0.435857	0.598399	0.58423	0.626328	0.475789	0.403387	0.298388	0.408957	0.447318	0.627094	0.833284	0.967138	1.2199	0.590682	1.2193	1.00067	0.18709	0.464292	0.467027	0.363586	0.308559	0.728519	0.483507	0.397424	0.636068	0.763387	0.581131	0.515606	0.44048	0.700809	0.625371
527	488	4.582	PS(15:0/18:2)	PS	C39 H72 O10 N1 P1	PS(15:0/18:2)+H	B	0.716959	1.2628	0.968538	1.28915	1.20243	0.521351	1.322	1.08776	0.93515	0.805483	0.384854	0.318639	0.236949	0.301287	0.221823	0.167191	0.175079	0.158639	0.205504	0.262231	0.115995	0.218154	0.385305	0.118511	0.124963	0.410702	0.796049	1.11275	1.39874	1.05153	0.534437	0.5411	0.837808	0.908446	0.724518	0.572312	0.438621	0.571459	0.506326	0.347136	0.383247	0.312771
528	489	5.184	PS(16:0/18:1)	PS	C40 H76 O10 N1 P1	PS(16:0/18:1)+H	A	0.343268	0.508314	0.362298	0.486279	0.460847	0.53142	1.27839	0.980165	0.946373	0.622079	0.820214	0.57278	0.802746	0.757256	0.725831	0.935797	1.04485	1.05559	1.15638	1.2111	0.638421	1.19179	1.67885	0.615702	0.90429	0.391386	0.665191	0.761219	0.621696	0.743982	0.971349	1.05095	1.22928	0.974976	1.12806	1.20449	1.06191	1.32467	1.00659	0.677459	1.04237	0.691014
529	490	4.8	PS(16:0/18:2)	PS	C40 H74 O10 N1 P1	PS(16:0/18:2)+H	A	0.630692	0.936435	0.755192	0.895385	0.820463	0.732096	1.12505	1.16404	1.14714	0.833253	0.86169	0.700742	0.712233	0.814069	0.709796	0.614522	0.629919	0.537603	0.713335	0.854372	0.279321	0.556705	0.834697	0.280285	0.30913	0.325703	0.614411	0.757477	0.805472	0.783357	0.769292	0.718049	1.1047	0.97351	0.905445	0.905239	0.960338	1.01725	0.761682	0.537584	0.680679	0.488311
530	491	4.498	PS(16:0/18:3)	PS	C40 H72 O10 N1 P1	PS(16:0/18:3)+H	B	0.983907	2.19195	1.33529	1.77634	2.00652	0.430901	1.12021	0.979937	0.753131	0.637607	0.509136	0.419116	0.365089	0.343315	0.323923	0.265206	0.256234	0.237029	0.318834	0.408706	0.144224	0.296887	0.439777	0.122843	0.147857	0.109022	0.0689758	0.153173	0.311647	0.214635	0.205741	0.198451	0.286158	0.401852	0.225389	0.0926224	0.162843	0.156676	0.0780913	0.0702468	0.112411	0.104138
531	492	4.481	PS(18:2/18:2)	PS	C42 H74 O10 N1 P1	PS(18:2/18:2)+H	B	1.26349	1.75752	1.28005	2.03365	1.75865	0.42359	1.08976	0.898392	0.808034	0.819287	0.410333	0.297304	0.299061	0.269604	0.235018	0.16001	0.156483	0.169172	0.193135	0.27739	0.0799841	0.116154	0.170305	0.0799418	0.0698731	0.200382	0.293065	0.521118	0.693845	0.391934	0.228178	0.193696	0.335574	0.424165	0.24411	0.191811	0.192577	0.26304	0.197566	0.142804	0.189224	0.104082
532	493	4.857	PS(26:2p)	PS	C32 H58 O9 N1 P1	PS(26:2p)+(CH3CH2)3NH	C	1.53396	0.962427	1.50889	0.643622	0.578261	1.3007	1.3996	2.03717	1.45268	0.596191	1.21957	1.15503	0.946999	0.965243	0.665103	0.506437	0.714798	0.485402	0.417015	0.562124	0.273956	0.366111	0.673748	0.184271	0.104782	0.5991	0.726325	0.370102	0.470031	0.347776	0.753065	0.498653	0.328399	0.385628	0.293478	0.289447	0.425994	0.226898	0.38305	0.289301	0.235385	0.256171
533	494	3.989	PS(33:2p)	PS	C39 H72 O9 N1 P1	PS(33:2p)+H	C	0.298338	0.497673	0.486693	0.238587	0.279185	0.345917	0.483315	0.661929	0.58495	1.39967	0.485369	0.262744	0.275258	0.17476	0.175518	0.111226	0.115691	0.0556258	0.108218	0.250461	0.0343699	0.0592723	0.0833859	0.0181017	0.0098809	0.475964	0.625942	0.200209	0.355975	0.248206	0.0704131	0.0943048	0.165051	0.247448	0.143327	0.0492639	0.0665047	0.0454323	0.0419673	0.0557237	0.0446066	0.0207865
534	495	4.174	PS(38:4)	PS	C44 H78 O10 N1 P1	PS(38:4)+K	C	0.247579	0.145781	0.101262	0.0893908	0.056437	0.691963	2.66357	0.823055	0.887557	0.352706	1.31024	0.562882	0.851216	1.5013	0.992402	3.07824	2.10833	1.88313	1.43784	1.20649	4.14636	2.16643	2.60426	2.42271	1.87449	0.539553	0.563327	0.260582	0.207762	0.165415	1.19219	1.15167	1.5841	0.615857	0.711647	3.17275	2.07451	1.64556	1.36686	0.616198	3.71291	2.73279
535	496	4.859	PS(45:4)	PS	C51 H92 O10 N1 P1	PS(45:4)+Na	C	2.28145	0.312316	0.724093	0.414657	0.369254	1.72517	1.00877	0.39975	0.48699	0.460948	2.2923	1.80946	2.69791	2.53584	1.92703	2.60719	2.67901	2.87235	2.03691	1.81673	2.80265	2.95908	2.26363	2.20559	2.11098	2.75191	2.2273	1.22146	0.35992	0.560613	2.4407	2.67204	2.09847	1.32929	1.37421	2.70407	2.65442	1.8574	2.32888	2.42308	2.38221	2.26796
536	497	4.219	PS(47:7)	PS	C53 H90 O10 N1 P1	PS(47:7)+Na	C	0.99835	1.15181	1.02293	1.07467	0.983859	1.0317	0.990769	0.931053	0.906339	0.938799	1.01694	0.991297	0.930334	0.977763	0.940119	1.0401	0.988976	0.918266	0.89937	0.865136	1.04086	1.09069	1.04249	0.8824	0.863853	1.04065	1.10868	0.864072	0.918289	0.893272	1.04789	0.954354	0.862358	0.859875	0.827615	0.996423	0.970997	0.87253	0.835715	0.862736	1.03393	0.955632
537	498	2.256	So(d18:0)	So	C18 H39 O2 N1	So(d18:0)+H	B	0.845859	1.13518	1.05928	1.01624	0.852355	0.463653	0.624412	0.817867	0.610756	0.909064	0.625263	0.384034	0.357093	0.474541	0.546836	0.352042	0.284882	0.322051	0.305101	0.471842	0.311137	0.937056	0.64109	0.303036	0.192702	0.569344	0.63393	0.342015	0.603746	0.627744	0.663167	0.600171	0.527527	0.532062	0.827987	0.785699	0.687594	1.0827	0.619336	0.375931	0.799534	0.373409
538	499	1.056	So(d18:1)	So	C18 H37 O2 N1	So(d18:1)+H	B	0.488975	0.515185	0.440308	0.506863	0.537963	0.917912	1.24926	1.62272	1.47823	1.23171	1.49419	1.18307	1.54168	1.47488	1.35632	1.47856	1.3851	1.09203	1.39172	1.25189	0.726089	0.954141	1.27754	0.626822	0.756222	1.25923	1.41454	1.14101	1.29441	1.52795	1.28127	1.13637	1.21104	0.95107	1.27072	1.08196	1.10484	1.43016	0.826281	0.796726	0.887744	0.704129
539	500	1.901	So(d18:1)	So	C18 H37 O2 N1	So(d18:1)+H	B	0.262177	0.29724	0.368926	0.260425	0.244795	0.631324	1.07303	1.39557	1.19045	1.30848	0.958	0.809055	0.885222	1.02772	0.978615	0.820977	0.689299	0.578165	0.786075	0.93787	0.370261	0.676735	1.01298	0.349327	0.507308	1.04248	1.18854	0.492976	1.14282	1.21094	0.631974	0.500253	0.803447	1.5187	0.840879	0.610712	0.638729	0.786055	0.476353	0.366751	0.49581	0.27786
540	501	2.352	So(d18:1)	So	C18 H37 O2 N1	So(d18:1)+H	B	0.306215	0.27824	0.300522	0.289845	0.265369	0.468986	0.589365	0.675923	0.58484	0.665346	0.516303	0.589947	0.427996	0.554114	0.483403	0.615769	0.434857	0.542118	0.446095	0.551585	0.580905	0.926425	0.693643	0.476515	0.571328	0.618357	0.622719	0.339335	0.612231	0.709705	0.775642	0.61796	1.11202	1.1958	0.831994	1.1335	1.21925	1.33168	0.870863	0.641792	1.19917	0.714882
541	502	2.8	So(d18:1)	So	C18 H37 O2 N1	So(d18:1)+H	B	0.138849	0.24561	0.235081	0.141232	0.14791	0.421574	1.14167	0.560592	0.500175	0.492597	0.570275	0.37279	0.310119	0.739965	0.64431	0.510876	0.42526	0.474386	0.622871	0.8758	0.25224	0.472565	0.738413	0.235957	0.386587	0.932813	1.09532	0.642129	1.20284	1.12007	0.897685	0.455569	1.73921	1.69216	1.71663	1.95027	1.54149	2.82533	1.20212	0.56686	1.46297	0.67623
542	503	1.798	So(d18:2)	So	C18 H35 O2 N1	So(d18:2)+Na	D	0.103957	0.222141	0.169164	0.266753	0.464353	0.122028	0.150534	0.102888	0.24952	0.154123	0.183679	0.141303	0.099552	0.344376	0.12902	0.098906	0.0627689	0.08897	0.106997	0.274576	0.100033	0.0718301	0.165675	0.188017	0.197242	0.0876403	0.224845	0.252308	0.467574	0.547	0.158285	0.118972	0.0697776	0.181696	0.147839	0.157146	0.121469	0.102548	0.274963	0.347781	0.218007	0.385318
543	504	2.322	So(d18:2)	So	C18 H35 O2 N1	So(d18:2)+Na	D	0.132476	0.106069	0.185082	0.178294	0.220217	0.0814495	0.0996122	0.13206	0.165937	0.170564	0.0682517	0.173186	0.0876508	0.145371	0.139658	0.0975001	0.12596	0.0877686	0.153343	0.12235	0.080017	0.139178	0.116152	0.127745	0.11661	0.109557	0.141229	0.526804	0.243424	0.242498	0.20218	0.168847	0.154969	0.145815	0.279134	0.217927	0.119788	0.227772	0.232243	0.255651	0.150717	0.183509
544	505	2.246	So(d20:0)	So	C20 H43 O2 N1	So(d20:0)+H	D	0.938109	1.37624	1.74464	1.40209	1.41017	0.641295	0.694497	0.350128	0.605101	0.832165	1.49279	1.03034	0.979437	0.530542	0.555873	0.449932	0.328271	0.309071	0.278515	0.323105	0.34397	0.366376	0.464096	0.28748	0.273924	1.1355	0.788025	0.606565	0.877201	1.17605	0.48421	0.436909	0.96358	0.618995	0.681707	0.462275	0.331646	0.311769	0.276089	0.34835	0.331334	0.226311
545	506	7.715	TG(10:0/12:0/18:1)	TG	C43 H80 O6	TG(10:0/12:0/18:1)+NH4	A	0.70295	1.037	0.743515	0.868403	0.661186	1.24488	1.16617	1.60542	1.54584	1.56326	1.65231	1.49993	1.27792	1.70602	1.55179	1.21338	1.41494	1.71257	1.21495	1.89274	1.35401	1.48279	2.43139	1.55167	1.83389	0.649796	0.940557	1.21335	0.657425	0.568332	0.401429	0.472654	0.429471	0.530543	0.389955	0.421978	0.478213	0.437388	0.522351	0.482216	0.418445	0.389067
546	507	8.08	TG(10:0/18:1/18:2)	TG	C49 H88 O6	TG(10:0/18:1/18:2)+NH4	A	0.371406	0.410381	0.414203	0.474887	0.527215	0.290999	0.445896	0.346038	0.335824	0.414636	0.475994	0.342498	0.473544	0.483664	0.543621	0.460243	0.418435	0.394083	0.479318	0.481822	0.483357	0.699575	0.962055	0.44474	0.491099	0.770909	0.828215	0.61941	0.868937	0.689206	0.793239	0.657594	1.19063	1.13639	0.885579	1.01974	0.938258	1.02537	0.770699	0.655743	1.11301	0.808562
547	508	4.335	TG(11:0/11:0/11:0)	TG	C36 H68 O6	TG(11:0/11:0/11:0)+NH4	A	0.441317	0.50236	0.493114	0.547246	0.333027	0.445726	0.617074	0.573554	0.6092	0.794677	0.512285	0.402158	0.363588	0.523261	0.480454	0.340688	0.304608	0.26046	0.332428	0.318133	0.257083	0.397415	0.572892	0.251734	0.283367	0.906753	0.916383	0.481624	0.910891	0.653087	0.419275	0.466129	0.630401	0.833011	0.560703	0.50907	0.623747	0.626382	0.395205	0.293929	0.435824	0.229548
548	509	8.055	TG(11:0/18:2/18:2)	TG	C50 H88 O6	TG(11:0/18:2/18:2)+NH4	B	0.0989885	0.254325	0.167662	0.287236	0.216431	0.193937	0.255105	0.25267	0.199055	0.310098	0.784646	0.397343	0.74856	1.051	0.814713	0.779065	0.484128	0.63775	0.810046	0.730344	0.678431	0.804728	1.01046	0.893427	0.723892	0.442474	0.305176	0.375079	0.479366	0.302205	0.312178	0.316665	0.683769	0.38545	0.413081	1.01065	1.07987	0.921845	0.56099	0.432231	1.88133	1.27144
549	510	7.262	TG(12:0/12:0/12:0)	TG	C39 H74 O6	TG(12:0/12:0/12:0)+NH4	A	0.85749	0.90261	0.855939	0.989208	0.835278	0.608466	0.641259	0.662559	0.655773	0.599522	0.649197	0.749485	0.784604	0.747228	0.790406	0.927878	0.838692	0.950784	0.990924	0.794147	0.941672	1.04506	0.914273	0.886508	0.808501	1.27113	1.30344	1.27055	1.33149	1.29881	1.2125	1.31692	1.19168	1.24939	1.15875	1.12114	1.19532	1.36935	1.62866	1.29096	1.30949	1.25616
550	511	7.667	TG(12:0/12:0/14:0)	TG	C41 H78 O6	TG(12:0/12:0/14:0)+Na	A	1.63154	1.70984	1.75467	2.17087	1.82795	1.21208	1.09899	1.14988	1.3477	0.885693	0.916541	1.33689	1.29515	1.09315	1.30495	1.21778	1.25383	1.57332	1.56842	1.03226	1.54637	1.32249	1.20086	1.76113	1.43723	1.3137	1.55031	1.82757	1.57284	1.69423	1.4961	1.6372	1.34391	1.32904	1.48338	1.26843	1.38404	1.46766	1.7281	1.69918	1.54842	1.75665
551	512	8.037	TG(12:0/12:0/18:3)	TG	C45 H80 O6	TG(12:0/12:0/18:3)+H	B	2.65418	1.91415	1.90406	3.2108	2.57191	1.54736	1.3103	1.41606	1.59533	1.11118	1.31958	2.08893	1.76939	1.48087	1.74471	1.41662	1.59745	2.31625	2.03872	1.22243	1.99894	1.6623	1.07725	2.46023	1.9104	1.57154	1.37609	2.05613	1.49391	1.93928	2.22482	2.1069	1.61342	1.46336	1.45985	1.57757	1.72334	1.79536	2.45207	2.52009	2.47395	3.07334
552	513	8.933	TG(12:0/12:0/22:0)	TG	C49 H94 O6	TG(12:0/12:0/22:0)+NH4	B	0.176824	0	0.110959	0.664683	0.22221	0.615386	1.82549	0	1.05855	0	0	0.10102	0.803331	0.115316	0	0	0	0	0	0	0.337322	0	0	0	0.678588	1.34075	2.26539	0	3.46276	1.25193	3.30611	2.07894	0.34628	2.0775	0.194665	0.516074	2.03489	0.741655	1.46117	3.01182	7.67228	0.611101
553	514	8.252	TG(12:0/17:1/18:2)	TG	C50 H90 O6	TG(12:0/17:1/18:2)+NH4	B	0.127425	0.197432	0.0872341	0.341739	0.792496	0.232022	0.917204	0.701595	0.176633	0.8704	0.257608	0.111071	0.43841	0.335281	1.43068	0.235824	0.258592	0.265461	1.45657	0.266958	0.316196	0.230889	0.372503	0.552584	1.55232	1.45813	1.78533	1.08397	1.53913	1.43786	1.24098	1.22401	1.61186	1.84524	1.31736	1.43489	1.39006	1.81889	1.20361	1.04654	1.90499	1.15092
554	515	8.119	TG(12:0/18:2/18:2)	TG	C51 H90 O6	TG(12:0/18:2/18:2)+NH4	A	0.607758	0.92643	0.646568	0.799619	0.740036	0.44092	0.576305	0.515197	0.588683	0.600695	0.523673	0.514124	0.733548	0.582338	0.607234	0.543893	0.524284	0.443558	0.504095	0.63928	0.494345	0.610128	0.668463	0.441882	0.511141	1.03267	0.95426	0.829467	1.16555	0.905095	0.583602	0.603798	0.885013	0.86789	0.669401	0.769977	0.738055	0.778662	0.689651	0.51445	0.846769	0.586022
555	516	7.844	TG(12:0/18:2/18:3)	TG	C51 H88 O6	TG(12:0/18:2/18:3)+NH4	A	1.15985	2.47406	1.31113	1.62919	2.09715	0.56264	0.900924	0.665303	0.624234	0.81733	0.536098	0.571679	0.613142	0.746864	0.528514	0.492169	0.442037	0.378827	0.476136	0.533272	0.423326	0.663114	0.589355	0.475684	0.488617	0.256442	0.33609	0.296475	0.318169	0.229467	0.17798	0.159974	0.366774	0.215685	0.224822	0.554757	0.316603	0.466502	0.243054	0.266288	1.26903	0.711936
556	517	8.376	TG(14:0/14:0/14:0)	TG	C45 H86 O6	TG(14:0/14:0/14:0)+NH4	A	0.951871	1.02413	1.12625	2.12745	1.24515	0.899764	0.989934	0.873023	1.0204	0.777125	0.902969	0.931293	0.844214	0.89682	1.12266	0.772477	0.768633	0.913439	1.04896	0.789552	0.883037	0.951768	0.807712	1.09602	0.958052	0.95417	0.947767	1.1341	1.16142	1.32228	0.886872	0.858173	0.876153	1.01235	0.996046	0.718922	0.8984	0.92065	1.19044	1.22381	1.00732	0.89869
557	518	8.552	TG(14:0/17:1/18:2)	TG	C52 H94 O6	TG(14:0/17:1/18:2)+NH4	A	0.257756	0.584977	0.24359	0.279128	0.448035	0.351469	0.408834	0.357984	0.631271	0.507966	0.568525	0.318731	0.432942	0.782168	0.451353	0.502395	0.68836	0.577406	0.362535	0.464052	0.447456	0.782654	0.415775	0.342665	0.427532	1.09839	0.884303	0.909744	1.13212	1.01497	1.03915	1.15887	1.2746	1.4631	1.2188	1.3396	1.31349	1.34981	1.2541	1.05253	1.3801	1.01929
558	519	8.286	TG(14:0/17:2/18:2)	TG	C52 H92 O6	TG(14:0/17:2/18:2)+NH4	A	0.346413	0.360635	0.401443	0.426313	0.355448	0.419957	0.547168	0.529422	0.494591	0.627941	0.466668	0.562566	0.410494	0.531221	0.565745	0.579585	0.519904	0.267625	0.304682	0.57256	0.363956	0.59629	0.450848	0.326024	0.548843	1.20324	1.21754	0.899207	1.22729	1.08636	0.838928	0.783955	1.19172	0.971997	1.01294	1.02786	1.01028	1.09298	0.719162	0.724556	1.15829	0.621667
559	520	8.43	TG(14:0/18:2/18:2)	TG	C53 H94 O6	TG(14:0/18:2/18:2)+NH4	A	0.500872	0.582509	0.564436	0.557223	0.498419	0.618831	0.679581	0.681458	0.675062	0.701223	0.90551	0.797526	0.803339	0.888299	0.784802	0.963212	0.877795	0.735816	0.880338	0.932599	0.876677	0.976714	1.06458	0.770725	0.802407	0.979039	0.94325	0.794602	0.919395	0.800981	0.800923	0.799892	1.04262	1.02408	0.897665	1.02931	1.01923	0.822655	0.848492	0.72973	1.0807	0.769427
560	521	8.809	TG(15:0/14:0/18:1)	TG	C50 H94 O6	TG(15:0/14:0/18:1)+NH4	A	0.335641	0.397704	0.384639	0.400266	0.362464	0.455606	0.521028	0.480919	0.483803	0.505428	0.560581	0.50952	0.554855	0.559661	0.539454	0.544152	0.576814	0.517447	0.492327	0.586915	0.564879	0.580172	0.597354	0.528222	0.554378	1.23698	1.2419	1.02355	1.18367	1.06575	1.28335	1.38683	1.25225	1.72341	1.38634	1.296	1.35395	1.51148	1.44297	1.30468	1.4258	1.11858
561	522	8.547	TG(15:0/14:0/18:2)	TG	C50 H92 O6	TG(15:0/14:0/18:2)+NH4	A	0.30988	0.393479	0.280066	0.376717	0.329338	0.406704	0.437021	0.517432	0.426694	0.474867	0.549015	0.504581	0.617144	0.694825	0.561	0.496833	0.510878	0.408874	0.401731	0.51965	0.457468	0.666463	0.603406	0.379408	0.553413	1.22576	1.22596	1.05467	1.32054	1.08352	1.20501	1.3123	1.25724	1.91236	1.28081	1.41631	1.36285	1.47982	1.47161	1.24553	1.59548	1.1621
562	523	9.097	TG(15:0/16:0/16:0)	TG	C50 H96 O6	TG(15:0/16:0/16:0)+NH4	A	0.347896	0.39915	0.2851	0.416259	0.298332	0.390906	0.398819	0.314547	0.283962	0.31513	0.262648	0.214661	0.396806	0.337866	0.282021	0.280067	0.288313	0.246062	0.289375	0.363218	0.205879	0.30986	0.232418	0.21239	0.222701	1.23236	1.20042	0.994261	1.22408	0.814547	1.54499	1.42547	1.30475	2.22868	1.36435	1.65405	1.52987	2.00574	1.88425	1.82986	1.68262	1.51342
563	524	9.085	TG(15:0/16:0/18:1)	TG	C52 H98 O6	TG(15:0/16:0/18:1)+NH4	A	0.485443	0.51468	0.480921	0.534649	0.457475	0.600116	0.667697	0.655836	0.642272	0.685533	0.774477	0.646775	0.698649	0.705537	0.666862	0.67744	0.669128	0.644406	0.651731	0.736436	0.648343	0.66284	0.699239	0.627294	0.670724	1.02241	1.07696	0.943755	1.05273	0.959623	1.11589	1.12184	1.16609	1.4514	1.15936	1.14765	1.1724	1.23653	1.25338	1.04262	1.12113	0.941224
564	525	8.848	TG(15:0/16:0/18:2)	TG	C52 H96 O6	TG(15:0/16:0/18:2)+NH4	A	0.437013	0.492079	0.44978	0.475134	0.430238	0.582906	0.647859	0.668327	0.620211	0.725302	0.750822	0.719679	0.682378	0.7594	0.708102	0.708502	0.702606	0.583448	0.627664	0.740302	0.638345	0.695699	0.713665	0.580643	0.632724	1.06111	1.0995	0.898199	1.05309	0.900148	1.03099	1.11047	1.04947	1.39407	1.19576	1.04547	1.12604	1.24013	1.17737	1.05896	1.1662	0.875408
565	526	8.845	TG(15:0/18:1/18:2)	TG	C54 H98 O6	TG(15:0/18:1/18:2)+NH4	A	0.448082	0.518188	0.482626	0.492847	0.449058	0.520329	0.626629	0.628527	0.580823	0.684402	0.719492	0.656039	0.647649	0.723284	0.674313	0.660555	0.658148	0.546056	0.59135	0.708729	0.609041	0.658122	0.711414	0.570144	0.619615	1.05217	1.11955	0.85665	1.05681	0.928653	0.970752	1.02196	1.10142	1.18523	1.13741	1.04062	1.1126	1.17345	1.02011	0.895486	1.10541	0.775261
566	527	8.591	TG(15:0/18:2/18:2)	TG	C54 H96 O6	TG(15:0/18:2/18:2)+NH4	A	0.464259	0.622186	0.579642	0.563137	0.470544	0.659115	0.765334	0.780438	0.770298	0.847905	0.839851	0.764926	0.751643	0.840604	0.746061	0.689521	0.687502	0.584131	0.613271	0.682728	0.686434	0.72483	0.802734	0.578023	0.662397	1.12279	1.11769	0.914519	1.20332	0.993574	0.858274	0.9402	1.11709	1.1249	0.960991	0.987861	0.997617	1.00921	0.923851	0.735166	0.872484	0.667624
567	528	8.352	TG(15:0/18:2/18:3)	TG	C54 H94 O6	TG(15:0/18:2/18:3)+NH4	A	0.931457	1.31255	1.48371	1.21145	0.953747	0.971871	1.12482	1.10419	1.04871	1.26577	0.866425	0.919268	0.86365	0.985071	0.906607	0.74352	0.638839	0.578055	0.705718	0.719858	0.636301	0.850801	0.946944	0.598056	0.658645	0.543846	0.304088	0.294064	0.198185	0.543335	0.287953	0.227624	0.445775	0.411448	0.351116	0.375618	0.30369	0.3644	0.319081	0.204103	0.365697	0.243587
568	529	8.175	TG(15:1/15:2/24:6)	TG	C57 H92 O6	TG(15:1/15:2/24:6)+H	B	1.39982	1.58571	1.45987	1.52086	1.42011	1.19717	1.30082	1.37068	1.24741	1.24281	1.0506	1.37366	1.15892	1.05308	0.876254	0.940621	0.834271	0.925505	0.985675	0.821973	1.12587	0.943371	0.730742	1.01925	0.948342	1.33644	1.06276	1.23194	1.28608	1.17628	1.56223	1.29863	1.56259	1.22696	1.36906	1.58672	1.76291	1.69602	1.3298	1.43238	2.04735	1.76823
569	530	8.092	TG(15:2/18:2/18:2)	TG	C54 H92 O6	TG(15:2/18:2/18:2)+NH4	A	1.37412	2.13326	2.05617	1.75925	1.64921	1.06188	1.36299	1.30915	1.22855	1.44948	0.905671	0.645632	0.89529	0.207009	0.958939	0.541978	0.561886	0.575495	0.701293	0.655892	0.405526	0.629793	0.863542	0.402952	0.695425	0.144695	0.409656	0.156456	0.130824	0.122619	0.0383916	0.0632685	0.116171	0.0687919	0.0615148	0.0666166	0.184616	0.258635	0.0652062	0.0306788	0.232345	0.165661
570	531	8.374	TG(16:0/10:0/18:1)	TG	C47 H88 O6	TG(16:0/10:0/18:1)+NH4	A	0.474942	0.0336095	0.545534	0.973664	0.604225	0.451309	0.847021	0.481657	0.542358	0.500578	0.690232	0.55626	0.626939	0.699436	0.635552	0.67245	0.77875	0.670424	0.872925	0.701797	0.725294	0.776294	0.998151	0.785522	0.835436	0.861597	0.896955	0.747816	0.825272	0.891145	0.899778	0.816976	1.00916	1.28888	0.883239	1.02917	1.11775	1.21583	1.03625	1.01533	1.11333	0.772422
571	532	8.038	TG(16:0/12:0/12:0)	TG	C43 H82 O6	TG(16:0/12:0/12:0)+Na	B	2.43931	1.91413	1.91627	3.21069	2.57192	1.55387	1.27725	1.41603	1.59531	1.11117	1.31955	2.08886	1.76935	1.48081	1.74459	1.41659	1.59733	2.31622	2.03863	1.24854	1.99897	1.66227	1.07722	2.46016	1.91036	1.57157	1.37607	2.0561	1.48127	1.93693	2.14741	2.10687	1.61343	1.44921	1.4665	1.57753	1.72334	1.82893	2.45202	2.52	2.45901	3.09443
572	533	8.4	TG(16:0/12:0/18:2)	TG	C49 H90 O6	TG(16:0/12:0/18:2)+NH4	A	0.37455	0.560338	0.425828	0.577537	0.469408	0.324286	0.58323	0.362346	0.406589	0.432094	0.609707	0.548403	0.644681	0.665731	0.567356	0.803432	0.755264	0.614698	0.782432	0.770063	0.692822	0.7823	0.9916	0.61615	0.709247	0.824329	0.900036	0.754865	0.849139	0.78321	0.855858	0.822389	0.899013	1.17693	0.979234	1.17894	1.14309	1.14024	0.974509	0.831008	1.17226	0.726893
573	534	8.926	TG(16:0/14:0/18:1)	TG	C51 H96 O6	TG(16:0/14:0/18:1)+NH4	A	0.452086	0.563523	0.574353	0.577563	0.552731	0.590535	0.669765	0.648275	0.661568	0.594074	0.796393	0.739319	0.812591	0.800509	0.834731	1.0508	1.03031	0.899395	0.954705	0.878772	1.0112	1.08388	0.778243	0.889426	0.992317	0.920722	1.02647	0.971134	0.940563	0.87888	1.11688	1.18372	1.11101	1.40273	1.08823	1.14977	1.18034	1.21568	1.23883	1.20488	1.22973	1.04226
574	535	8.671	TG(16:0/14:0/18:2)	TG	C51 H94 O6	TG(16:0/14:0/18:2)+NH4	A	0.507497	0.564716	0.493604	0.52402	0.50735	0.54985	0.63613	0.608613	0.602459	0.581432	0.836411	0.775614	0.700777	0.771412	0.832574	1.12121	0.994505	0.917297	0.807467	0.990484	1.03603	1.17183	0.971118	0.75586	0.890754	0.908171	0.928568	0.893806	0.848597	0.815561	1.0177	1.10078	1.10089	1.35036	1.10519	1.3669	1.00882	1.42154	1.19808	1.08015	1.33629	0.857631
575	536	3.468	TG(16:0/15:2/15:2)	TG	C49 H86 O6	TG(16:0/15:2/15:2)+H	B	0.0526259	0.19333	0.0522926	0.130269	0.0650966	0.118294	0.0227773	0.0594827	0.08921	0.0721014	0.0921086	0.171559	0.0927864	0.0802188	0.0119598	0.698922	0.12285	0.103595	0.283732	0.0498141	0.135644	0.117674	0.183901	0.0924901	0.0791535	0.108286	0.10937	0.0622187	0.169263	0.0493095	0.209531	0.520764	0.14111	0.065323	0.088215	0.0335638	0.778075	0.0363187	0.182928	0.18858	0.133987	0.366076
576	537	9.218	TG(16:0/16:0/16:0)	TG	C51 H98 O6	TG(16:0/16:0/16:0)+NH4	A	0.694584	0.55279	0.487775	0.520891	0.646966	0.526502	0.564523	0.676846	0.404729	0.197488	0.55904	0.243285	0.621569	0.111759	0.457058	1.18437	0.673432	0.371818	0.865016	0.636377	0.558717	0.687372	0.543799	0.454534	0.536165	1.29332	1.35519	0.826629	1.03987	1.2124	1.5129	1.80621	1.59877	2.26551	1.8557	1.74732	1.96815	1.86684	1.7605	1.71714	2.43658	1.40297
577	538	9.358	TG(16:0/16:0/17:0)	TG	C52 H100 O6	TG(16:0/16:0/17:0)+NH4	A	0.35238	0.39424	0.289676	0.346108	0.343528	0.229658	0.288584	0.259495	0.261302	0.290913	0.293798	0.259519	0.242687	0.26368	0.276288	0.251601	0.278031	0.229167	0.291661	0.259888	0.214997	0.185019	0.19442	0.194089	0.205729	0.936623	1.05458	0.8212	0.955656	0.96803	1.38572	1.4819	1.20625	2.68545	1.38196	1.62617	1.56738	2.03288	1.88433	2.1757	2.11683	1.80164
578	539	9.213	TG(16:0/16:0/18:1)	TG	C53 H100 O6	TG(16:0/16:0/18:1)+NH4	A	0.57553	0.660941	0.600842	0.637699	0.63974	0.684813	0.750784	0.741407	0.656337	0.688436	0.986196	0.934932	1.03299	0.926061	0.966793	1.25211	1.18268	1.07556	1.10324	1.00227	1.1713	1.20196	1.20159	1.0234	1.01207	1.2502	1.00571	0.996469	1.01822	0.985889	1.16331	1.1791	1.16356	1.19211	1.10336	1.18674	1.15026	1.16432	1.14192	1.08655	1.13489	1.03096
579	540	7.795	TG(16:0/16:0/18:2)	TG	C53 H98 O6	TG(16:0/16:0/18:2)+H	A	0.213471	0.135783	0.218339	0.131435	0.126824	0.297729	0.405749	0.307312	0.348615	0.331788	1.46811	0.413661	0.561323	0.778132	0.588361	1.49955	0.56882	0.524221	0.722881	0.618103	0.546861	0.574213	0.840316	0.426074	0.4652	0.922182	0.7077	0.83128	0.768196	0.687493	0.790157	0.78687	1.14746	1.40638	0.849976	0.856883	1.25166	1.06608	0.655609	0.607914	0.589653	0.308841
580	541	8.997	TG(16:0/16:0/18:2)	TG	C53 H98 O6	TG(16:0/16:0/18:2)+NH4	A	0.629856	0.653436	0.613687	0.637711	0.61071	0.704322	0.752026	0.782223	0.763075	0.725579	0.987738	0.932983	0.94964	0.987482	0.97616	1.1568	1.12884	0.994333	1.11265	1.03564	1.07484	1.16276	1.11187	0.936404	1.02383	0.947257	0.997299	0.943253	0.914687	0.877004	1.05192	1.06142	1.05357	1.25547	1.03986	1.04395	1.08361	1.12362	1.1513	1.09675	1.06634	0.979247
581	542	7.596	TG(16:0/16:0/18:3)	TG	C53 H96 O6	TG(16:0/16:0/18:3)+H	B	0.177391	0.226583	0.0964508	0.192039	0.169293	0.286582	0.57611	0.256467	0.357425	0.834779	1.19421	0.390228	0.561448	0.761977	0.6744	0.956473	0.478691	0.306902	0.196059	0.66896	0.307126	0.639846	1.01798	0.355402	0.38965	0.823401	0.693203	0.367467	0.0870002	0.245912	0.223978	0.689282	0.394301	0.102396	0.428671	0.718849	0.816526	0.560148	0.442233	0.419089	1.0445	0.171706
582	543	7.842	TG(16:0/16:0/20:3)	TG	C55 H100 O6	TG(16:0/16:0/20:3)+H	B	0.151775	0.209766	0.255934	0.198795	0.227531	0.235466	0.396828	0.302252	0.438513	0.444888	0.660111	0.421403	0.57648	0.863652	0.764613	0.841049	0.928896	0.481474	0.669307	0.930257	0.489862	0.740509	0.967467	0.377614	0.576473	0.479786	0.748438	0.439381	0.525066	0.601448	0.562241	0.707766	0.941737	0.989114	0.803127	1.11223	0.852003	1.19306	0.720792	0.669026	0.762877	0.389897
583	544	7.517	TG(16:0/16:0/20:4)	TG	C55 H98 O6	TG(16:0/16:0/20:4)+H	B	0.342559	0.390818	0.579489	0.30128	0.184022	0.431397	0.555877	0.61186	0.442472	0.605877	0.389429	0.452806	0.26908	0.863352	0.328971	0.67192	0.607752	0.186981	0.475321	0.382406	0.281899	0.332215	0.374037	0.325696	0.222533	0.607999	1.01334	0.409231	0.338244	0.312748	0.281635	0.531774	0.705908	0.359558	0.296736	0.333151	0.306687	0.7341	0.725753	0.630166	0.276015	0.48727
584	545	7.389	TG(16:0/16:0/20:5)	TG	C55 H96 O6	TG(16:0/16:0/20:5)+H	B	0.330359	0.411516	0.305577	0.288156	0.215653	0.442732	0.881098	0.37722	0.465055	0.991108	1.22031	0.406606	0.298467	0.752621	0.62248	0.277364	0.547445	0.319724	0.329574	0.718318	0.319169	0.535047	0.607071	0.274499	0.38703	1.25889	0.878999	0.334818	0.547771	0.736052	0.300424	0.362663	0.753561	0.625627	0.512722	0.576084	0.613285	0.806596	0.537939	0.449303	0.48409	0.348906
585	546	10.084	TG(16:0/16:0/24:0)	TG	C59 H114 O6	TG(16:0/16:0/24:0)+NH4	B	0.442027	0.531106	0.414874	0.467769	0.453242	0.299238	0.380013	0.467103	0.325094	0.368245	0.545325	0.517122	0.569076	0.533389	0.606394	0.810166	0.846477	0.735977	0.982456	0.819336	0.643755	0.775282	0.560887	0.6128	0.819374	0.531415	0.73651	0.558192	0.590678	0.549081	0.869704	0.958128	0.905724	1.6234	1.05285	1.15923	1.27919	1.45168	1.52159	1.62112	1.84493	1.47376
586	547	9.335	TG(16:0/17:0/18:1)	TG	C54 H102 O6	TG(16:0/17:0/18:1)+NH4	A	0.478205	0.585909	0.515352	0.504894	0.497847	0.570609	0.694826	0.65684	0.620927	0.689216	0.688257	0.645746	0.611241	0.666015	0.628288	0.613939	0.629524	0.537274	0.671866	0.668049	0.538633	0.525639	0.589658	0.527423	0.58114	1.10874	1.2755	1.02879	1.15133	1.12571	1.15138	1.29271	1.0954	1.46938	1.14777	1.13597	1.11351	1.29165	1.19167	1.22517	1.11535	1.01503
587	548	9.095	TG(16:0/17:0/18:2)	TG	C54 H100 O6	TG(16:0/17:0/18:2)+H	B	0.707852	0.996518	0.907045	0.801476	0.711962	1.88677	1.35231	0.502658	0.769912	1.45508	0.290676	0.906731	0.358044	0.509205	0.398003	0.347798	0.310945	0.330423	0.467521	1.97489	0.169621	0.21535	1.07774	0.270192	0.492335	0.994424	0.924313	1.96619	0.638579	2.53689	0.311303	1.06097	3.53662	2.79558	1.31358	0.392542	3.41724	4.7551	3.40082	0.495159	2.5453	2.38832
588	549	9.172	TG(16:0/18:1/18:1)	TG	C55 H102 O6	TG(16:0/18:1/18:1)+H	A	0.674116	0.224256	1.27227	0.351763	0.701646	0.332295	0.717166	0.516822	0.416964	0.602098	0.408402	0.709201	0.948641	0.982672	0.646897	0.712594	0.376127	0.932476	0.91291	0.595494	1.2735	0.712361	0.840628	0.501853	0.699009	0.419506	0.44494	1.10669	0.701907	0.697288	1.19799	1.4933	0.860537	2.39042	1.37034	0.66703	1.56394	1.40541	0.764325	0.952679	1.49539	0.58168
589	550	8.999	TG(16:0/18:1/18:2)	TG	C55 H100 O6	TG(16:0/18:1/18:2)+H	A	0.92962	0.952491	1.19085	0.559176	0.849055	0.881504	1.07195	0.947547	0.0804165	0.9042	1.87679	1.20998	1.29928	1.41368	1.58872	1.83431	1.222	2.03191	1.22502	0.75717	1.46061	0.786442	1.41489	0.498639	1.66749	1.07128	1.05632	0.573192	1.917	1.05883	1.37451	1.14416	1.87975	1.06522	1.35676	1.22815	1.86792	0.627812	1.15171	1.1201	1.21778	0.918708
590	551	10.058	TG(16:0/18:1/24:0)	TG	C61 H116 O6	TG(16:0/18:1/24:0)+NH4	A	0.548688	0.590823	0.503816	0.549029	0.525771	0.558599	0.642857	0.689311	0.730739	0.696443	0.834548	0.749922	0.83182	0.910297	0.872115	0.933673	0.897515	0.864252	0.969084	0.953264	0.894536	0.956343	0.890422	0.827854	1.03931	0.876395	0.977395	0.803655	0.888731	0.831831	0.893709	0.863033	1.06433	1.13134	0.985546	1.00295	0.981249	1.08575	0.965423	0.821302	0.958228	0.792627
591	552	8.74	TG(16:0/18:2/18:2)	TG	C55 H98 O6	TG(16:0/18:2/18:2)+H	A	0.554509	0.710999	0.656801	0.579985	0.562315	0.790168	0.885335	0.9723	0.806443	0.710407	1.18888	0.940701	0.97685	1.16359	0.92277	1.24499	1.06903	0.934494	1.0268	1.06506	0.894953	1.1127	1.09703	0.870192	1.05566	1.07093	0.936688	0.828946	0.961634	0.96877	0.804188	0.659156	0.967561	0.85805	0.774369	1.05726	0.894362	1.05847	0.800182	0.561227	0.757364	0.566265
592	553	9.794	TG(16:0/18:2/23:0)	TG	C60 H112 O6	TG(16:0/18:2/23:0)+NH4	B	0.553908	0.641854	0.607292	0.594455	0.549419	0.5497	0.618441	0.609897	0.629829	0.645447	0.705522	0.675978	0.517724	0.555299	0.604991	0.500756	0.48609	0.504142	0.580458	0.63989	0.419405	0.387348	0.403255	0.434797	0.4767	1.13777	1.34669	0.989883	1.26349	1.17921	1.13056	1.24267	1.25288	1.42409	1.43371	1.20746	1.11878	1.24646	1.33352	1.15921	1.18184	1.00594
593	554	9.888	TG(16:0/18:2/24:0)	TG	C61 H114 O6	TG(16:0/18:2/24:0)+NH4	A	0.616044	0.690346	0.646911	0.672161	0.608243	0.670784	0.730813	0.7337	0.748556	0.823204	0.840364	0.810315	0.842816	0.844328	0.858951	0.891325	0.883527	0.796972	0.900622	0.900731	0.815159	0.955844	0.829633	0.741666	0.864373	0.937245	1.05986	0.921482	0.956638	0.851575	0.950328	0.950106	1.09688	1.13298	0.969528	1.07775	0.958	1.12801	0.978456	0.860543	0.985463	0.754965
594	555	8.593	TG(16:0p/18:3/18:3)	TG	C55 H94 O5	TG(16:0p/18:3/18:3)+Li	B	0.36008	0.713398	0.589967	0.463154	0.402397	0.914031	0.890403	0.842046	0.91154	1.08877	0.979831	0.658179	0.53632	0.896046	0.898074	0.682762	0.785714	0.869133	0.72965	0.522217	0.399183	0.709664	0.788331	0.719712	0.853089	1.09828	0.536355	1.49441	1.08894	1.13346	0.660552	0.736103	1.53426	1.54315	1.18539	0.985306	1.20296	1.21496	1.05671	0.409365	0.332636	0.701066
595	556	7.937	TG(16:0p/8:0/18:1)	TG	C45 H84 O5	TG(16:0p/8:0/18:1)+NH4	B	0.422724	0.463951	0.43396	0.482602	0.362818	0.412948	0.43968	0.413372	0.430152	0.668271	0.445112	0.377686	0.412863	0.420106	0.390317	0.427575	0.394974	0.315513	0.314372	0.465212	0.530559	0.68584	0.806346	0.456616	0.598593	2.32989	2.96784	1.43351	1.90634	1.79401	1.34366	1.61867	1.20975	2.47823	1.55086	0.714408	0.748233	0.779168	0.833788	0.533264	0.871769	0.431646
596	557	6.665	TG(16:0p/9:0/9:0)	TG	C37 H70 O5	TG(16:0p/9:0/9:0)+Na	B	0.39798	0.430215	0.332502	0.339486	0.31114	0.448306	0.573908	0.460689	0.484812	0.640976	0.667652	0.595581	0.751982	0.744054	0.652968	0.965579	0.843205	0.696057	0.768195	0.826382	1.07066	1.2048	1.21	0.953981	0.972249	1.09381	1.26068	0.858718	1.04488	0.971405	1.13087	1.05662	1.39896	1.5065	1.077	1.23532	1.05563	1.53157	0.919284	0.812939	1.24294	0.814607
597	558	8.426	TG(16:1/18:2/18:2)	TG	C55 H96 O6	TG(16:1/18:2/18:2)+NH4	A	2.00451	2.48471	2.42048	0.499036	0.442465	0.523624	1.70803	0.60726	0.589449	0.689648	0.870029	0.687248	0.812669	0.850803	0.701623	0.940158	0.763852	0.717048	0.74905	1.28635	0.761214	1.32966	0.995101	0.748147	0.754841	0.730104	0.702484	0.605547	0.665303	0.614482	1.00699	1.02857	1.42337	1.21959	1.11665	1.33188	1.30147	1.27544	1.0761	0.9253	1.27469	0.894643
598	559	4.33	TG(16:1p/8:0/9:0)	TG	C36 H66 O5	TG(16:1p/8:0/9:0)+NH4	B	0.430648	0.530115	0.694822	0.402642	0.30757	0.525163	0.544093	0.489665	0.594558	0.776568	0.468057	0.41273	0.426318	0.450407	0.493386	0.328914	0.275294	0.24245	0.309825	0.308934	0.293941	0.44851	0.589477	0.227841	0.287364	1.01939	0.960976	0.472481	0.903778	0.703783	0.448919	0.402416	0.662774	0.8202	0.540069	0.556894	0.557329	0.639344	0.356934	0.306101	0.469501	0.242305
599	560	8.185	TG(16:2/18:2/18:2)	TG	C55 H94 O6	TG(16:2/18:2/18:2)+NH4	A	1.42529	1.01109	0.962838	0.833062	0.864011	0.664036	0.806961	0.889632	0.794077	0.90277	0.758415	0.818289	0.725838	0.931333	0.808467	0.84607	0.57824	1.1834	1.29414	0.570378	0.59904	0.737767	0.739258	0.473191	0.648971	0.689456	0.754365	0.458988	0.735975	0.607532	0.477319	0.497012	0.724194	0.627803	0.566119	0.572335	0.676462	0.656589	0.509414	0.42251	0.650014	0.460713
600	561	8.262	TG(17:0/10:0/18:2)	TG	C48 H88 O6	TG(17:0/10:0/18:2)+NH4	B	0.198097	0.166061	0.119222	0.230931	0.348665	0.138025	0.0407018	0.0680326	0.111311	0.112045	0.152168	0.376623	0.274516	0.879097	0.333416	0.267655	0.297194	0.216054	0.248415	0.629492	0.379602	0.16381	0.335376	0.29027	0.159779	1.60731	1.77069	1.19534	1.50815	1.5228	1.46556	1.46755	1.61792	2.44424	1.8768	1.6193	1.85818	2.17761	1.80821	1.50468	1.78269	1.35512
601	562	9.336	TG(17:0/18:1/18:1)	TG	C56 H104 O6	TG(17:0/18:1/18:1)+NH4	A	0.530612	0.655242	0.606215	0.593312	0.553815	0.527903	0.679922	0.608389	0.601397	0.650457	0.601894	0.581366	0.543555	0.592955	0.559212	0.541193	0.552731	0.482097	0.606601	0.590458	0.476819	0.485473	0.534294	0.476769	0.529792	0.985647	1.11131	0.909002	1.02942	0.973445	1.06406	1.19932	1.04181	1.45247	1.06894	1.12415	1.17541	1.35515	1.22615	1.33234	1.24114	1.06768
602	563	9.093	TG(17:0/18:1/18:2)	TG	C56 H102 O6	TG(17:0/18:1/18:2)+NH4	A	0.579894	0.64774	0.638292	0.663829	0.567323	0.586386	0.700621	0.66967	0.633894	0.710055	0.702003	0.632137	0.661797	0.676236	0.639129	0.616331	0.611336	0.583731	0.619084	0.675592	0.563293	0.587004	0.632918	0.545536	0.616412	1.13839	1.29118	1.0387	1.2176	1.094	1.0026	1.00008	1.16122	1.20794	1.01051	1.08109	1.08137	1.14753	1.01883	0.831156	1.01753	0.831332
603	564	9.972	TG(17:0/18:1/22:0)	TG	C60 H114 O6	TG(17:0/18:1/22:0)+NH4	B	0.546937	0.585052	0.541653	0.566781	0.561435	0.523138	0.646457	0.585764	0.572456	0.670831	0.583707	0.638779	0.605985	0.570373	0.581555	0.558173	0.561907	0.539727	0.664498	0.65468	0.508262	0.504142	0.44493	0.484281	0.622866	1.12815	1.16574	0.985559	1.15347	1.08959	1.1172	1.2299	1.2323	1.42216	1.19525	1.25668	1.11855	1.31732	1.17235	1.17855	1.21488	1.01924
604	565	10.147	TG(17:0/18:1/24:0)	TG	C62 H118 O6	TG(17:0/18:1/24:0)+NH4	B	0.560588	0.634309	0.548712	0.532381	0.585858	0.525534	0.677689	0.591782	0.60004	0.640452	0.590152	0.632606	0.601325	0.655384	0.581428	0.56509	0.549402	0.544194	0.633778	0.637707	0.456534	0.498058	0.350978	0.503029	0.566989	1.17783	1.21426	0.947049	1.20324	1.10137	1.10875	1.14515	1.23721	1.3702	1.28114	1.24191	1.03681	1.28287	1.25874	1.10921	1.19009	0.999068
605	566	8.868	TG(17:0/18:2/18:2)	TG	C56 H100 O6	TG(17:0/18:2/18:2)+NH4	A	0.547278	0.653506	0.610736	0.596111	0.560958	0.5903	0.728791	0.690324	0.623352	0.755663	0.66882	0.66791	0.622401	0.716352	0.660964	0.616616	0.606371	0.503075	0.580828	0.650872	0.564234	0.606698	0.647835	0.513334	0.582121	1.25054	1.34286	1.04831	1.32321	1.09229	0.902954	0.976814	1.13433	1.10186	1.06078	0.982451	1.04212	1.07991	0.916697	0.777809	1.01694	0.735996
606	567	9.978	TG(17:0/18:2/24:0)	TG	C62 H116 O6	TG(17:0/18:2/24:0)+NH4	B	0.573976	0.62294	0.59901	0.605415	0.587757	0.525907	0.66548	0.577499	0.593961	0.689292	0.591848	0.630978	0.593958	0.560305	0.574213	0.531237	0.540303	0.491589	0.621359	0.619883	0.492249	0.481231	0.442682	0.464758	0.575805	1.20716	1.23739	1.01615	1.22065	1.1331	1.10704	1.17574	1.30708	1.32458	1.17296	1.24716	1.09388	1.31927	1.12804	1.07033	1.17299	0.995936
607	568	8.206	TG(17:0/8:0/18:1)	TG	C46 H86 O6	TG(17:0/8:0/18:1)+NH4	B	0.367172	0.333183	0.207984	0.388583	0.268786	0.103815	0.879153	1.00208	1.12344	1.78852	0.233115	0.685477	1.27031	0.898291	0.13008	1.09637	1.4338	1.15365	0.525369	0.894377	0.630606	1.31101	1.5318	0.981419	1.01501	3.60571	3.29888	2.37367	3.81456	3.21057	4.40724	4.32888	5.562	7.02067	4.55494	4.10216	5.06127	5.86857	5.13621	3.70484	4.69087	2.17184
608	569	8.504	TG(17:2/17:2/21:5)	TG	C58 H94 O6	TG(17:2/17:2/21:5)+NH4	B	1.68527	1.19421	0.641153	1.05636	1.10489	1.37789	1.31667	0.618435	1.18	1.27799	0.305938	1.35287	1.19779	0.918036	1.11451	1.2513	1.13238	1.16621	1.16366	1.20714	1.46833	1.11181	1.04288	1.20488	0.706098	0.73204	1.0641	1.09946	1.15482	1.14864	1.1493	1.31546	1.11775	1.13259	1.03688	1.13255	1.14659	1.14324	1.07261	1.26831	0.633966	1.0666
609	570	7.762	TG(17:4/18:2/18:2)	TG	C56 H92 O6	TG(17:4/18:2/18:2)+Li	B	0.342773	0.280694	0.46235	0.422335	0.281212	0.838373	0.879096	0.616406	0.692201	0.721579	0.874757	0.713348	0.820155	0.920098	0.822812	1.5284	1.51276	0.869028	1.36442	0.919684	0.920264	1.54345	1.03556	0.8145	1.3842	1.28688	1.35694	1.23664	1.1219	0.99902	1.35356	1.38968	1.57482	1.58632	1.34875	1.63834	1.69027	1.70129	0.992627	1.39135	1.72598	0.86484
610	571	9.477	TG(18:0/16:0/16:0)	TG	C53 H102 O6	TG(18:0/16:0/16:0)+NH4	A	0.456899	0.57354	0.420094	0.447249	0.499995	0.355897	0.433062	0.509312	0.402053	0.402231	0.527198	0.51807	0.603848	0.565834	0.58236	0.726126	0.698605	0.553513	0.642507	0.626037	0.563571	0.704782	0.785112	0.480062	0.560126	0.795015	0.93306	0.709173	0.81109	0.802507	1.58807	1.60911	1.35978	2.05467	1.53284	1.8173	2.02716	2.05692	2.21259	2.13163	2.62038	2.09398
611	572	9.581	TG(18:0/16:0/17:0)	TG	C54 H104 O6	TG(18:0/16:0/17:0)+NH4	A	0.327222	0.359196	0.311392	0.351183	0.342292	0.150816	0.192417	0.234757	0.138466	0.190155	0.196035	0.223647	0.236895	0.207216	0.221099	0.203253	0.20939	0.208151	0.287503	0.254355	0.161971	0.214517	0.147053	0.15127	0.174591	0.666878	0.751778	0.571248	0.572913	0.68889	1.28923	1.52449	1.19887	2.41039	1.54693	1.88357	1.58281	2.05283	2.23235	2.71104	2.67905	2.00851
612	573	9.697	TG(18:0/16:0/18:0)	TG	C55 H106 O6	TG(18:0/16:0/18:0)+NH4	A	0.364592	0.411595	0.331698	0.366881	0.396459	0.210159	0.257661	0.443682	0.275404	0.315597	0.420026	0.467047	0.532189	0.488944	0.504874	0.890469	0.732163	0.62277	0.820652	0.628087	0.625801	0.762256	0.755015	0.489933	0.625913	0.408633	0.562953	0.460161	0.446078	0.439081	1.09802	1.22258	0.998784	2.01813	1.20847	1.69248	1.88653	2.18632	2.21426	2.31134	2.59733	1.87017
613	574	9.454	TG(18:0/16:0/18:1)	TG	C55 H104 O6	TG(18:0/16:0/18:1)+NH4	A	0.639562	0.672849	0.590476	0.644258	0.623051	0.720031	0.791207	0.804836	0.843428	0.796718	1.02037	0.921432	0.989229	0.970238	0.976397	1.16201	1.09159	1.07141	1.07688	1.20248	1.0804	1.21584	1.16236	1.00903	1.0216	0.872075	1.07365	0.907499	0.966379	0.825317	0.87754	0.920306	0.884647	0.981395	0.918566	0.901073	0.904535	0.932382	0.943912	0.871857	0.90811	0.842894
614	575	9.438	TG(18:0/16:0/18:1)	TG	C55 H104 O6	TG(18:0/16:0/18:1)+NH4	A	0.0223285	0.0214255	0.802648	0.952744	0.859966	0.975333	1.08039	1.09074	1.05198	1.10979	1.39912	1.2912	1.34692	1.31383	1.32673	1.57181	1.4931	1.42885	1.46817	1.31729	1.45054	1.58836	1.54345	1.43284	1.43788	0.116091	1.41005	1.22638	1.13379	1.1642	0.0445293	1.27132	1.22636	0.202345	1.24642	1.25852	1.22919	1.26115	1.26837	1.17913	1.30346	1.18297
615	576	9.797	TG(18:0/17:0/18:0)	TG	C56 H108 O6	TG(18:0/17:0/18:0)+NH4	A	0.332357	0.352678	0.293303	0.33901	0.372065	0.0881392	0.154546	0.201399	0.12516	0.122457	0.161634	0.187052	0.169834	0.17253	0.229137	0.225361	0.255811	0.215892	0.324093	0.328405	0.148014	0.184044	0.129172	0.145364	0.170394	0.307478	0.379581	0.317148	0.349906	0.354209	1.09719	1.33791	0.790409	2.63577	1.32237	1.59657	1.50209	1.7951	2.43666	2.92618	2.85387	2.25034
616	577	9.567	TG(18:0/17:0/18:1)	TG	C56 H106 O6	TG(18:0/17:0/18:1)+NH4	A	0.524989	0.592865	0.51753	0.539124	0.511472	0.525681	0.604294	0.62364	0.511174	0.627686	0.597432	0.661588	0.614619	0.61283	0.588664	0.518009	0.520642	0.546357	0.645871	0.628865	0.482588	0.495431	0.479001	0.483672	0.554199	1.00169	1.04659	0.855251	0.963255	0.946653	1.16713	1.28185	1.10436	1.75703	1.36579	1.28243	1.148	1.40072	1.46754	1.44616	1.42617	1.15548
617	578	9.892	TG(18:0/18:0/18:0)	TG	C57 H110 O6	TG(18:0/18:0/18:0)+NH4	A	0.351274	0.374741	0.307297	0.365081	0.386445	0.145995	0.247154	0.39065	0.193206	0.227867	0.445576	0.459707	0.598791	0.534111	0.606178	1.35417	1.13488	0.804935	1.1189	0.950044	0.79601	1.2366	0.85263	0.686894	0.92876	0.280045	0.427901	0.451803	0.240918	0.298553	0.721442	0.801916	0.596051	1.75949	0.888648	1.17701	1.28206	1.5148	1.69723	2.27901	2.32888	1.41082
618	579	9.673	TG(18:0/18:0/18:1)	TG	C57 H108 O6	TG(18:0/18:0/18:1)+H	A	0.591093	0.285251	0.726856	0.463303	0.824772	0.316162	0.515676	1.03119	0.368827	0.568623	0.953061	0.938274	0.678259	1.00589	1.30308	1.44993	1.21067	1.54007	1.39557	2.28019	1.21019	2.37219	1.61418	1.19695	1.89041	0.313595	0.690058	0.688598	0.812534	0.869329	0.549071	0.943996	0.583171	0.791793	0.405839	0.737869	0.729767	0.888261	1.36991	0.683953	0.904035	0.687656
619	580	9.988	TG(18:0/18:0/19:0)	TG	C58 H112 O6	TG(18:0/18:0/19:0)+NH4	B	0.37142	0.376104	0.315822	0.37021	0.357643	0.139367	0.228706	0.287504	0.156973	0.205851	0.201054	0.282391	0.292608	0.193794	0.222236	0.319108	0.301195	0.259972	0.38598	0.373474	0.206232	0.273835	0.169478	0.221359	0.241481	0.467169	0.520334	0.430005	0.497028	0.46401	1.06273	1.20333	0.886199	2.4387	1.29591	1.46411	1.26029	1.71651	1.93599	2.68296	2.48305	1.96883
620	581	9.42	TG(18:0/18:1/18:1)	TG	C57 H106 O6	TG(18:0/18:1/18:1)+H	B	0.851101	0.733611	0.811858	0.994373	0.817413	1.05093	1.13674	0.838894	1.06371	0.674446	0.849237	1.19901	1.03864	0.87385	1.06858	1.30902	1.04965	1.04947	1.06017	0.707181	1.05106	1.22603	1.48469	0.944326	0.448205	0.945239	1.29079	0.836848	0.703426	0.792541	0.925423	0.697171	0.966333	0.693484	0.624058	0.826919	0.897304	0.90907	1.03718	0.825783	0.687899	0.413897
621	582	9.767	TG(18:0/18:1/19:0)	TG	C58 H110 O6	TG(18:0/18:1/19:0)+NH4	A	0.501895	0.578162	0.556747	0.49934	0.530314	0.485446	0.583302	0.601128	0.572871	0.588706	0.659485	0.634149	0.590721	0.595511	0.615931	0.597975	0.584353	0.53999	0.73172	0.762261	0.496636	0.426926	0.476231	0.47719	0.632263	0.934908	1.13227	0.893459	0.986586	0.978151	1.12415	1.29907	1.04263	1.65759	1.26843	1.15385	1.10438	1.25878	1.49692	1.42256	1.31714	1.16004
622	583	9.864	TG(18:0/18:1/20:0)	TG	C59 H112 O6	TG(18:0/18:1/20:0)+NH4	A	0.540694	0.571719	0.514561	0.562482	0.543387	0.595841	0.645613	0.688107	0.687729	0.721227	0.94782	0.878882	1.01946	0.960485	0.984133	1.28175	1.19099	1.13763	1.28018	1.25602	1.17528	1.36784	1.21336	1.0696	1.29393	0.690468	0.814368	0.870058	0.664514	0.639157	0.766418	0.797239	0.781887	1.03503	0.787953	0.884804	0.808438	0.991628	0.904529	0.853357	0.900954	0.69591
623	584	10.222	TG(18:0/18:1/24:0)	TG	C63 H120 O6	TG(18:0/18:1/24:0)+NH4	A	0.568771	0.638445	0.543595	0.566686	0.531735	0.672557	0.774734	0.831594	0.766828	0.87922	0.866213	0.867296	0.920358	0.997055	0.931622	0.981995	0.945764	0.872933	1.03703	0.977353	0.936992	1.06487	0.652192	0.875817	1.03267	0.825771	0.963976	0.846647	0.786208	0.76473	0.735239	0.781704	0.87677	0.991895	0.854371	0.898102	0.768664	0.950805	0.871575	0.793775	0.851322	0.733553
624	585	9.121	TG(18:1/12:0/18:1)	TG	C51 H94 O6	TG(18:1/12:0/18:1)+(CH3CH2)3NH	B	0.987798	1.06283	0.12466	1.06104	0.855968	0.31957	1.09839	1.2672	1.00057	0.539862	0.363087	0.901958	0.90888	0.351683	0.899084	0.760127	0.814941	0.673198	0.595103	0.609525	0.675034	0.333398	0.795272	0.196708	0.901084	0.414969	1.36251	0.781187	1.3576	0.00114573	1.24414	0.368208	0.667348	0.0887889	1.02035	0.332559	0.961277	0.391792	0.242809	0.739777	1.35829	0.719028
625	586	8.401	TG(18:1/12:0/18:2)	TG	C51 H92 O6	TG(18:1/12:0/18:2)+NH4	A	0.348469	0.489037	0.510875	0.485358	0.593303	0.357536	0.622013	0.527622	0.445351	0.578042	0.588053	0.539187	0.724651	0.655011	0.609782	0.885265	0.764795	0.666572	0.890736	0.803939	0.73406	0.897337	1.0294	0.689278	0.812342	0.809522	0.86004	0.768912	0.81695	0.709211	0.783844	0.775405	1.08302	1.1318	0.948094	1.19692	1.12091	1.08641	0.916296	0.762814	1.123	0.73276
626	587	8.723	TG(18:1/14:0/14:0)	TG	C49 H92 O6	TG(18:1/14:0/14:0)+NH4	A	0.598787	0.591936	0.486886	0.748063	0.560674	0.452187	0.834571	0.507655	0.616597	0.508049	0.000921088	0.687973	0.943151	0.788126	0.798042	1.40213	1.11396	1.13698	1.14327	1.10222	1.21738	1.28215	1.29371	1.11257	1.17154	1.08318	1.07175	1.12968	1.10393	1.07517	1.27028	1.45141	1.35042	1.60672	1.33967	1.7019	1.58313	1.79575	1.44511	1.34991	1.55819	1.05095
627	588	8.679	TG(18:1/14:0/18:2)	TG	C53 H96 O6	TG(18:1/14:0/18:2)+NH4	A	0.387287	0.414852	0.372663	0.428912	0.39795	0.429441	0.674462	0.685738	0.672816	0.445023	0.686819	0.576088	0.927974	0.682596	0.928549	1.17159	0.997386	0.932854	0.771502	1.04557	1.08241	1.21955	1.25703	1.00602	0.77459	0.867653	0.901079	0.854584	0.823985	0.803568	0.95522	1.06949	1.15729	1.1022	1.04179	1.32171	1.22093	1.33625	1.09029	0.951171	1.30195	0.882235
628	589	7.84	TG(18:1/17:1/18:1)	TG	C56 H102 O6	TG(18:1/17:1/18:1)+Li	B	0.289946	0.370653	0.306205	0.343157	0.213607	0.371132	0.456661	0.526155	0.595582	0.503129	0.933389	0.922574	1.12621	1.2666	1.05125	2.10175	1.27992	1.60901	1.7057	1.20592	1.02275	1.50046	2.23181	1.15613	1.24393	0.46884	0.699023	0.610742	0.526373	0.437971	0.460413	0.306978	0.577325	0.946787	0.492013	0.793114	0.44308	0.503744	0.442326	0.277592	0.3687	0.226464
629	590	7.569	TG(18:1/17:1/18:2)	TG	C56 H100 O6	TG(18:1/17:1/18:2)+Li	B	0.272491	0.320497	0.323038	0.318827	0.210656	0.33109	0.412925	0.417178	0.469075	0.587103	0.895385	0.642622	1.1214	1.04903	0.900234	1.39249	1.11307	0.848292	1.07927	1.07997	0.856515	1.2268	1.36651	0.632266	0.923002	0.506296	0.540183	0.476871	0.534625	0.458086	0.412068	0.470555	0.619924	0.851779	0.55666	0.585602	0.643846	0.767845	0.492068	0.339566	0.44928	0.218272
630	591	9.217	TG(18:1/18:1/18:1)	TG	C57 H104 O6	TG(18:1/18:1/18:1)+H	A	1.40396	0.536092	0.668929	0.392567	0.675274	0.348622	1.76496	1.53488	1.51452	1.42441	1.29142	1.46029	1.09113	1.48593	1.51081	2.43949	1.26026	1.87877	1.10229	1.59746	0.902219	0.476049	1.23553	0.834031	1.66003	1.45157	1.09665	1.54457	1.42219	0.956774	0.488915	1.2795	0.240797	0.575151	0.469185	1.2331	1.2289	1.56266	1.0181	0.653321	1.48355	0.673443
631	592	7.769	TG(18:1/18:1/18:2)	TG	C57 H102 O6	TG(18:1/18:1/18:2)+H	A	0.313105	0.422769	0.413993	0.369537	0.215474	0.384918	0.488358	0.278255	0.385696	0.683404	0.91474	0.560927	0.719639	0.678673	0.6188	0.728875	0.789906	0.734986	0.608578	0.674761	0.562551	0.763238	0.967535	0.425091	0.604089	0.582833	0.646078	0.342906	0.385306	0.351177	0.398692	0.407302	0.678123	0.580362	0.578421	0.554474	0.701741	0.715195	0.436488	0.400301	0.498265	0.228787
632	593	9	TG(18:1/18:1/18:2)	TG	C57 H102 O6	TG(18:1/18:1/18:2)+NH4	A	1.14185	1.18705	1.1611	1.13051	1.03943	1.1678	1.25273	1.30653	1.29086	1.26014	1.32065	1.18758	0.895397	1.00135	0.934294	1.34332	1.22583	0.574466	1.3002	1.21591	1.30293	1.41578	1.44924	1.243	1.24986	1.12885	1.20779	1.1379	1.11395	1.03649	0.968103	0.971611	1.13811	1.00916	0.978036	1.05275	1.0846	1.06367	1.00791	0.890238	1.05005	0.947376
633	594	7.534	TG(18:1/18:1/18:3)	TG	C57 H100 O6	TG(18:1/18:1/18:3)+H	A	0.381985	0.482342	0.622401	0.546858	0.344503	0.325155	0.670656	0.379793	0.449262	0.762145	1.12138	0.49219	0.479543	0.734243	0.71034	0.580382	0.551275	0.325292	0.424442	0.708565	0.376645	0.361386	0.653349	0.27298	0.425781	0.664662	0.759474	0.30093	0.415336	0.389804	0.290094	0.349378	0.67821	0.469852	0.437193	0.471961	0.522929	0.470471	0.381994	0.325501	0.344788	0.273469
634	595	7.551	TG(18:1/18:1/19:3)	TG	C58 H102 O6	TG(18:1/18:1/19:3)+Li	B	0.297158	0.381416	0.374752	0.290555	0.247125	0.430458	0.546353	0.525643	0.710258	0.68734	1.02571	0.7251	1.07158	1.3205	1.12979	1.61285	1.44142	1.04603	1.32124	1.36979	1.27347	1.67175	2.08454	0.968015	1.30491	0.557921	0.624552	0.611151	0.596914	0.50408	0.43752	0.527939	0.699193	0.87507	0.618138	0.564568	0.530544	0.717849	0.465521	0.374314	0.510446	0.227895
635	596	7.585	TG(18:1/18:1/19:4)	TG	C58 H100 O6	TG(18:1/18:1/19:4)+Li	B	0.366641	0.487055	0.469313	0.460214	0.301121	0.482101	0.621454	0.587824	0.60393	0.764217	0.915653	0.867346	1.18726	0.975413	1.0344	1.28532	1.55704	1.18607	1.36233	1.2859	1.06848	1.16279	1.66318	0.802104	1.11202	0.611355	0.718394	0.664695	0.618407	0.511201	0.601052	0.807317	0.766769	0.758308	0.882576	0.633734	0.941666	0.884249	0.676051	0.524266	0.572506	0.474023
636	597	9.17	TG(18:1/18:1/20:2)	TG	C59 H106 O6	TG(18:1/18:1/20:2)+NH4	A	3.20333	1.12009	3.76348	3.35661	3.13187	3.69367	3.85862	3.90163	3.73575	4.05294	0.803313	3.32127	0.69727	2.56494	0.758435	0.802252	0.768003	0.664002	0.751002	0.604959	0.665166	0.85203	0.621439	0.607447	0.58919	1.12292	1.00613	1.17828	2.74285	1.04699	0.991324	1.11493	1.00966	2.04747	2.64404	0.855606	0.967226	2.73631	0.863104	2.12312	0.941649	0.853932
637	598	9.025	TG(18:1/18:1/20:3)	TG	C59 H104 O6	TG(18:1/18:1/20:3)+NH4	A	1.46019	1.59022	1.62791	1.43647	1.35505	1.17797	1.25601	1.25992	1.19324	1.21854	1.02484	0.970961	0.762913	1.00737	0.962749	0.892731	0.805989	0.837157	0.88214	0.857223	0.845611	0.913878	0.348341	0.835993	0.624108	0.825488	0.858199	0.789223	0.821781	0.755292	0.724392	0.624738	0.726225	0.563681	0.634955	0.573434	0.611835	0.604598	0.588202	0.506349	0.551016	0.518411
638	599	9.567	TG(18:1/18:1/21:1)	TG	C60 H110 O6	TG(18:1/18:1/21:1)+NH4	B	0.621888	0.749606	0.690832	0.682578	0.612665	0.60887	0.685078	0.688686	0.570443	0.741923	0.599318	0.667936	0.65822	0.635211	0.566564	0.463903	0.517056	0.437318	0.547346	0.562089	0.431459	0.552452	0.445742	0.549706	0.504726	1.5855	1.67179	1.22363	1.55093	1.48453	1.10222	1.10519	1.29289	1.30484	1.31689	1.25911	1.05968	1.15733	0.972257	0.945057	0.995407	0.835268
639	600	9.124	TG(18:1/18:1/21:5)	TG	C60 H102 O6	TG(18:1/18:1/21:5)+H	B	1.41893	1.65315	1.67578	1.90642	0.901532	1.60763	1.54072	1.62563	1.55718	1.5143	1.42374	1.53461	1.21428	1.3146	1.18772	0.996634	1.17019	1.18917	1.25485	1.3192	1.06584	0.590023	0.827468	1.11947	1.12894	1.42578	1.66132	1.43531	1.81696	1.72151	1.38905	1.42302	1.25471	1.0706	1.28411	1.08916	0.630579	1.19721	1.22484	0.686656	1.06307	1.21369
640	601	9.29	TG(18:1/18:1/22:3)	TG	C61 H108 O6	TG(18:1/18:1/22:3)+NH4	A	1.86717	2.36918	2.609	1.93751	1.81291	1.90525	2.30658	1.98282	1.73622	2.0312	1.39299	1.53885	1.31246	1.38177	1.36032	0.895249	0.967786	0.842161	0.961216	1.16232	0.863603	0.86377	0.89338	0.764343	0.851424	0.370361	0.471077	0.440188	0.422238	0.336167	0.282095	0.210113	0.301589	0.190599	0.176377	0.189556	0.291304	0.206172	0.174477	0.130675	0.133869	0.145082
641	602	10.055	TG(18:1/18:1/24:0)	TG	C63 H118 O6	TG(18:1/18:1/24:0)+NH4	A	0.677068	0.735643	0.65953	0.673932	0.62194	0.652044	0.743861	0.797614	0.835107	0.811379	0.869836	0.807499	0.858723	0.94448	0.885083	0.887966	0.871811	0.851024	0.933405	0.91855	0.858656	0.949249	0.851493	0.823813	0.966599	0.886736	0.95757	0.803143	0.883709	0.798611	0.820137	0.806073	0.958958	0.968835	0.884365	0.946726	0.927254	1.03989	0.915619	0.752918	0.97642	0.776618
642	603	8.727	TG(18:1/18:2/18:2)	TG	C57 H100 O6	TG(18:1/18:2/18:2)+NH4	A	0.808908	0.92834	0.890807	0.864796	0.767839	0.801951	0.913069	0.94561	0.83972	0.890524	1.02799	0.903969	0.93929	0.974489	0.977847	1.03074	0.910649	0.908319	0.951871	0.958113	0.965609	1.10573	1.13797	0.939707	0.967383	0.835059	0.849683	0.771484	0.793924	0.737892	0.704724	0.733177	0.876284	0.735043	0.73524	0.848915	0.815045	0.860282	0.710707	0.617153	0.82095	0.600837
643	604	9.649	TG(18:1/18:2/22:0)	TG	C61 H112 O6	TG(18:1/18:2/22:0)+NH4	A	0.715147	0.860755	0.799405	0.74295	0.707657	0.755068	0.800857	0.856055	0.819165	0.911808	0.867252	0.843726	0.856899	0.856914	0.847346	0.811592	0.803572	0.712293	0.810029	0.83164	0.738526	0.813125	0.769636	0.687059	0.737286	1.09528	1.17702	0.941743	1.1981	1.032	0.92195	0.969502	1.14904	0.872953	0.956669	1.0795	0.948839	1.03784	0.840227	0.706269	0.795519	0.668143
644	605	9.766	TG(18:1/18:2/23:0)	TG	C62 H114 O6	TG(18:1/18:2/23:0)+NH4	A	0.561788	0.690154	0.671163	0.606374	0.584413	0.626513	0.734204	0.726086	0.764939	0.785498	0.744664	0.675115	0.616154	0.654453	0.669745	0.557394	0.547436	0.481697	0.627423	0.688391	0.517421	0.475196	0.482016	0.446326	0.579279	1.28826	1.50756	1.0775	1.39979	1.2881	1.00445	1.02934	1.3462	1.00472	1.10189	1.06199	1.01756	1.00042	0.95211	0.714324	0.857522	0.71198
645	606	9.877	TG(18:1/18:2/24:0)	TG	C63 H116 O6	TG(18:1/18:2/24:0)+NH4	A	0.635499	0.703324	0.668176	0.70745	0.641712	0.768002	0.853556	0.829963	0.850433	0.98509	0.883115	0.830375	0.805857	0.823049	0.838068	0.785348	0.754663	0.693411	0.806182	0.822662	0.747831	0.792128	0.779801	0.718621	0.786619	1.11294	1.24045	1.00908	1.17164	1.02447	0.920964	0.904842	1.1751	0.932937	0.936187	0.990851	0.875867	0.991394	0.788092	0.656183	0.780003	0.618787
646	607	8.773	TG(18:1/18:3/22:3)	TG	C61 H104 O6	TG(18:1/18:3/22:3)+NH4	B	1.83639	2.66275	2.80595	2.62212	1.42993	1.16452	1.7954	1.56744	1.47448	0.938577	0.819879	1.4005	0.830501	1.09198	0.885479	0.356919	0.75881	0.47084	0.602961	0.691315	0.587077	0.61506	0.519952	0.579357	0.570006	0.049148	0.120508	0.157441	0.0688213	0.139906	0.0283091	0.0301124	0.040264	0.0117237	0.00236357	0.0172515	0.0189179	0.00583104	0.0225735	0.0193324	0.016755	0.029491
647	608	10.574	TG(18:1/22:0/24:0)	TG	C67 H128 O6	TG(18:1/22:0/24:0)+NH4	B	0.464272	0.548148	0.465622	0.444173	0.497954	0.471771	0.606067	0.679213	0.602996	0.660573	0.675908	0.71032	0.612692	0.823677	0.688484	0.651001	0.649006	0.656752	0.871935	0.840161	0.633006	0.73405	0.619002	0.702765	0.934473	0.814178	1.09869	0.804068	0.884451	0.812455	0.754939	0.897843	1.05015	1.1652	1.08393	1.09013	0.777219	1.24305	0.984513	0.847166	1.0966	0.716752
648	609	10.737	TG(18:1/24:0/24:0)	TG	C69 H132 O6	TG(18:1/24:0/24:0)+NH4	A	0.484467	0.56311	0.491246	0.518655	0.502156	0.526167	0.692234	0.68529	0.686523	0.732967	0.758752	0.852372	0.639667	0.811416	0.752556	0.663074	0.626036	0.621768	0.802692	0.812987	0.712092	0.743776	0.845462	0.684119	0.831969	0.985967	1.22689	0.925855	1.00033	0.927703	0.92499	1.05909	1.09247	1.14179	1.03368	1.16709	0.72687	1.15142	0.897097	0.849447	1.03721	0.745947
649	610	5.811	TG(18:1p/8:0/8:0)	TG	C37 H68 O5	TG(18:1p/8:0/8:0)+H	B	1.30126	1.23818	1.18317	1.16441	1.18767	1.33268	1.45657	1.11512	1.09305	1.0094	1.30214	1.25663	1.24811	1.15893	1.20911	1.34754	1.25692	1.22932	1.1624	1.1195	1.38304	1.29697	1.14752	1.40187	1.28173	1.1909	1.13432	0.983838	0.127679	0.946021	1.0153	1.02799	1.01208	0.804709	0.991595	1.2091	1.14343	1.12643	1.10851	1.12306	1.26485	1.33891
650	611	6.325	TG(18:1p/9:0/9:0)	TG	C39 H72 O5	TG(18:1p/9:0/9:0)+H	B	1.128	1.05746	1.00703	0.987673	0.952779	1.14753	1.07179	1.11289	1.14343	1.08494	1.17556	1.0514	1.08674	1.02685	1.06168	1.00401	1.0804	1.12623	1.09746	1.13566	1.06013	1.11674	1.0579	1.06166	0.974147	1.11988	1.04576	1.18736	1.12553	1.06671	1.13733	1.03658	0.992197	1.03302	1.10708	1.03883	1.1125	1.05697	1.25531	1.06964	1.16652	1.16897
651	612	8.052	TG(18:2/13:1/18:2)	TG	C52 H90 O6	TG(18:2/13:1/18:2)+NH4	A	0.518725	0.781821	0.806336	0.658386	0.578173	0.613797	0.814752	0.617135	0.651195	0.958022	0.960666	0.695402	0.591851	1.0345	1.24913	0.753134	0.597772	0.664264	0.707603	0.879153	0.714209	0.891571	1.11239	0.444396	0.520886	0.338302	0.145462	0.447034	0.458877	0.360155	0.250845	0.33971	0.488269	0.353769	0.254739	0.432976	0.704546	0.418734	0.369057	0.252829	1.06473	0.840333
652	613	8.187	TG(18:2/14:1/18:2)	TG	C53 H92 O6	TG(18:2/14:1/18:2)+NH4	A	0.766676	1.46427	1.14064	1.17967	0.999343	0.852987	1.057	1.0134	0.924689	1.05572	0.709496	0.866587	0.986094	1.01337	0.850894	0.86128	0.776552	0.760257	0.760213	0.857825	0.628439	0.775964	1.29335	0.841599	0.904804	0.409125	0.339861	0.344562	0.431071	0.371771	0.374676	0.366433	0.683287	0.418021	0.435117	0.621391	0.633527	0.606143	0.351232	0.32405	1.00892	0.901888
653	614	8.584	TG(18:2/17:1/18:2)	TG	C56 H98 O6	TG(18:2/17:1/18:2)+NH4	A	0.580789	0.758586	0.721056	0.695148	0.612118	0.657787	0.79928	0.770622	0.744296	0.853171	0.807194	0.735897	0.730926	0.819158	0.775668	0.670856	0.669342	0.560961	0.627212	0.67487	0.510045	0.726502	0.79209	0.567197	0.673803	0.914919	0.975923	0.750217	1.01941	0.880715	0.734336	0.811771	1.02212	1.00882	0.864055	0.914302	0.884875	0.891679	0.809829	0.645769	0.820582	0.61086
654	615	8.331	TG(18:2/17:2/18:2)	TG	C56 H96 O6	TG(18:2/17:2/18:2)+NH4	A	0.688788	0.888647	1.0047	0.863416	0.711858	0.756093	0.906667	0.912056	0.818391	1.01996	0.740871	0.815216	0.726956	0.843051	0.769226	0.659052	0.609066	0.486133	0.597495	0.639633	0.570668	0.725796	0.754154	0.545625	0.600915	0.837852	0.930435	0.659845	0.831493	0.81611	0.537441	0.554293	0.843816	0.848968	0.702355	0.636856	0.659527	0.701435	0.603496	0.458198	0.584325	0.348911
655	616	8.073	TG(18:2/17:3/18:2)	TG	C56 H94 O6	TG(18:2/17:3/18:2)+NH4	A	1.29566	1.96977	1.98873	1.69014	1.5355	1.2063	1.48751	1.38213	1.18565	1.61073	0.837664	0.97583	0.932138	1.01522	0.939339	0.669436	0.575442	0.528031	0.702534	0.634347	0.645816	0.840039	0.951415	0.628135	0.684355	0.108456	0.16865	0.173978	0.113173	0.0971038	0.0243994	0.0234238	0.0426626	0.0258289	0.0230096	0.020098	0.0201462	0.0187323	0.0238561	0.0126419	0.0215888	0.0160938
656	617	8.482	TG(18:2/18:2/18:2)	TG	C57 H98 O6	TG(18:2/18:2/18:2)+H	A	0.544746	0.776589	0.669055	0.696986	0.607935	0.800935	0.963094	0.843297	0.80143	0.980944	1.08419	0.646557	0.8472	0.987536	1.26485	0.984536	0.78905	0.705245	0.796444	0.851071	0.701919	0.832199	1.00598	0.711553	0.714628	0.838618	0.74281	0.568912	0.653915	0.702122	0.669431	0.577789	0.586799	0.771807	0.731423	0.614083	0.71577	0.704452	0.527002	0.47644	0.511235	0.434945
657	618	9.367	TG(18:2/18:2/21:0)	TG	C60 H108 O6	TG(18:2/18:2/21:0)+NH4	B	0.744616	0.94678	0.919528	0.825452	0.662398	0.777797	0.917536	0.826301	0.786041	0.91346	0.684387	0.751664	0.567181	0.562764	0.588636	0.51213	0.529499	0.382507	0.562374	0.514493	0.416353	0.429944	0.470961	0.394389	0.455427	1.71225	1.88638	1.42284	1.74088	1.64816	1.0917	1.19965	1.3666	1.16397	1.00671	0.885909	1.04429	1.03047	0.907086	0.771361	0.772383	0.759621
658	619	8.888	TG(18:2/18:2/21:2)	TG	C60 H104 O6	TG(18:2/18:2/21:2)+NH4	B	1.38967	1.69822	1.43858	1.50964	1.70477	1.22567	1.53692	1.18734	1.34379	1.24756	1.07698	1.13928	0.897463	1.18088	0.803334	0.80852	0.648728	0.584479	0.711887	0.494469	0.713991	0.753069	0.87518	0.620256	0.742822	0.728566	0.899887	0.232677	0.72016	0.587581	0.404117	0.584627	0.693351	0.581627	0.29532	0.494699	0.310672	0.495404	0.39288	0.341248	0.404246	0.0997399
659	620	9.587	TG(18:2/18:2/23:0)	TG	C62 H112 O6	TG(18:2/18:2/23:0)+NH4	A	0.696955	0.843183	0.825465	0.788474	0.696523	0.846601	0.947835	0.913261	0.771464	1.01361	0.729294	0.812713	0.722678	0.735935	0.704129	0.476551	0.49707	0.464347	0.598834	0.594561	0.45427	0.436596	0.445984	0.471656	0.470283	1.66065	1.81157	1.21152	1.62046	1.4714	0.991071	0.961018	1.40877	0.901729	1.0854	1.04283	0.937847	0.914195	0.738736	0.577636	0.660234	0.58336
660	621	5.838	TG(18:2p/8:0/10:0)	TG	C39 H70 O5	TG(18:2p/8:0/10:0)+H	B	1.30042	1.1613	1.22567	1.09762	1.1191	1.30779	1.19981	1.15322	1.11928	1.07643	1.27575	1.26897	1.27824	1.18364	1.26821	1.23744	1.27398	1.20684	1.11292	1.09232	1.35986	1.21912	1.2173	1.34089	1.27859	1.15222	1.10322	1.04292	0.8728	0.935591	1.11256	1.05751	1.03914	0.795314	0.973022	1.19423	1.13477	1.08162	1.08962	1.09318	1.27262	1.25631
661	622	6.3	TG(18:2p/8:0/10:0)	TG	C39 H70 O5	TG(18:2p/8:0/10:0)+H	B	0.545947	0.584568	0.45587	0.63238	0.434608	0.752565	0.718966	0.629066	0.63988	0.904427	0.828897	0.736068	0.820959	0.953437	0.78561	0.889903	0.751795	0.730718	2.44638	0.76669	0.824151	0.966513	1.08408	0.784603	0.704535	1.15608	1.21797	0.721414	0.964981	0.885064	0.696687	0.801295	1.07571	1.01923	0.868496	0.997519	0.964369	0.858437	0.697336	0.663326	0.84946	0.65347
662	623	4.992	TG(18:2p/9:0/9:0)	TG	C39 H70 O5	TG(18:2p/9:0/9:0)+H	B	1.6149	0.0680705	0.356518	0.222227	0.299818	0.616638	0.182744	0.161174	0.316627	0.0650813	2.30582	2.43451	1.59229	0.412495	2.04564	0.454666	2.39272	0.527638	0.179074	0.23286	0.439035	0.119502	2.38167	0.160991	2.41355	0.390339	2.55856	0.374675	0.444776	0.394046	0.560873	2.26618	1.79379	1.72223	0.745232	0.371924	0.591264	0.452198	0.775561	0.890245	0.838022	0.400924
663	624	7.92	TG(18:3/14:1/18:2)	TG	C53 H90 O6	TG(18:3/14:1/18:2)+NH4	B	0.662193	1.30535	0.890355	0.9768	0.717532	0.55751	0.556063	0.686322	0.499939	0.600994	0.712058	0.538608	0.732219	0.606188	0.595253	0.723488	0.603171	0.533593	0.476843	0.545312	0.627804	0.915297	1.02264	0.645273	0.743878	0.268205	0.207313	0.311014	0.208356	0.207787	0.163189	0.426249	0.324157	0.139041	0.171956	0.572444	0.845529	0.538412	0.26795	0.284426	1.53278	0.994677
664	625	7.86	TG(18:3/17:2/22:3)	TG	C60 H100 O6	TG(18:3/17:2/22:3)+Li	B	0.641563	0.624967	0.833101	0.605319	0.448216	0.53229	0.545386	0.656999	0.605647	0.579889	0.799676	0.852369	1.0858	0.998315	0.865252	1.22172	1.33268	1.15759	1.09321	0.949167	1.01879	1.15711	1.2761	1.06148	1.36431	1.02404	0.939696	0.85476	0.942353	0.901537	1.13176	1.06769	1.15583	1.1176	1.05225	1.56464	1.25912	1.41473	1.15198	1.04574	1.37412	0.818435
665	626	7.239	TG(18:3/17:2/22:5)	TG	C60 H96 O6	TG(18:3/17:2/22:5)+Li	B	2.10557	3.06334	2.11588	2.1652	1.46949	0.88949	1.59183	2.37855	0.897307	3.17769	3.24607	1.09136	1.15839	1.08318	1.06918	1.10016	0.996243	0.83945	0.976561	1.12474	0.780632	0.985356	1.02067	0.689827	0.800218	3.86738	1.60938	1.20159	1.68162	1.54294	1.0558	1.13921	1.33191	1.17798	1.16713	1.09889	1.24255	1.17117	0.729204	0.68268	0.677841	0.62809
666	627	8.23	TG(18:3/18:2/18:2)	TG	C57 H96 O6	TG(18:3/18:2/18:2)+H	A	1.40788	2.22619	2.15009	1.54308	1.42209	1.21873	1.63014	1.17112	1.53228	1.33756	0.923022	1.03478	0.983469	1.11959	0.756975	1.06007	0.715606	0.90559	0.900561	0.655904	0.773568	1.40453	1.25842	1.078	0.89734	0.15854	0.197741	0.324509	0.13713	0.184121	0.102005	0.181544	0.059531	0.0824885	0.0669463	0.0519995	0.0973907	0.0453159	0.133692	0.031495	0.0939009	0.0926577
667	628	7.973	TG(18:3/18:2/18:3)	TG	C57 H94 O6	TG(18:3/18:2/18:3)+NH4	A	1.46111	2.05755	1.83012	1.65713	1.61704	1.01961	1.29544	1.21683	1.01235	1.28875	0.736184	0.843909	0.881101	0.857013	0.826679	0.607793	0.592266	0.570091	0.666169	0.612506	0.5795	0.903463	0.964616	0.628445	0.643572	0.0644782	0.115917	0.185184	0.063121	0.0769739	0.00791435	0.0115421	0.0138876	0.00891046	0.00905253	0.00490198	0.00670525	0.00680513	0.00889682	0.00833598	0.00749532	0.00667971
668	629	8.262	TG(18:3/18:2/20:3)	TG	C59 H98 O6	TG(18:3/18:2/20:3)+NH4	A	1.57093	1.94795	1.99815	1.64408	1.59411	1.05816	1.22597	1.12796	0.999489	1.22512	0.801556	0.777228	0.822905	0.875709	0.749207	0.691898	0.607145	0.608506	0.663557	0.603019	0.593863	0.847116	0.872687	0.614713	0.649706	0.102424	0.155974	0.202726	0.0987872	0.0965616	0.0115512	0.0141166	0.0220257	0.0125102	0.0144302	0.00928425	0.0108457	0.0122904	0.0132442	0.00816977	0.00748228	0.00670244
669	630	9.393	TG(18:3/18:2/23:0)	TG	C62 H110 O6	TG(18:3/18:2/23:0)+NH4	B	2.0141	2.20893	2.86931	2.41231	1.74563	1.95078	2.18907	1.94352	1.92626	2.28841	1.10022	1.24822	1.36661	1.11777	1.02541	0.568859	0.693385	0.561794	0.805652	0.800337	0.352095	0.660575	0.62513	0.612938	0.688493	0.477891	0.747177	0.521168	0.332076	0.658187	0.171455	0.189439	0.531627	0.110286	0.199752	0.33449	0.212746	0.147419	0.103835	0.129802	0.0542882	0.170058
670	631	7.69	TG(18:3/18:3/18:3)	TG	C57 H92 O6	TG(18:3/18:3/18:3)+Na	A	3.26359	3.88455	3.59268	2.89437	3.34864	1.30353	1.58651	1.57195	1.35897	1.32465	0.659767	1.00839	1.11716	0.803764	0.887663	0.599441	0.639058	0.714033	0.808173	0.542887	0.664585	0.943451	0.893041	0.738698	0.811209	0.0532406	0.0933614	0.190824	0.0627761	0.0821695	0.0146125	0.00640326	0.00909307	0.0174724	0	0	0.0101341	0.0079665	0.0166889	0.0226898	0.0050597	0.0222326
671	632	7.561	TG(18:3/18:3/21:3)	TG	C60 H98 O6	TG(18:3/18:3/21:3)+Li	B	0.675712	0.601804	0.597419	0.459318	0.289629	0.575426	0.906671	0.449592	0.485395	0.885828	0.97406	0.722694	0.917891	0.960429	0.798836	1.02418	0.985901	0.821255	0.923467	0.968008	0.842009	0.986967	0.96913	0.607674	0.798569	0.953324	0.980693	0.684212	0.947337	0.694799	0.637715	0.947921	1.18084	1.13816	0.958563	0.859691	0.693768	0.91297	0.635995	0.542867	0.682956	0.413209
672	633	7.798	TG(18:4/17:1/18:1)	TG	C56 H96 O6	TG(18:4/17:1/18:1)+Li	B	0.295083	0.300989	0.231075	0.301483	0.240135	0.402214	0.937547	0.393025	0.526938	1.11173	1.69348	0.448193	0.471873	1.35235	0.828166	0.839952	0.883799	0.394176	0.513765	0.987152	0.504784	0.727079	0.687632	0.410017	0.507092	0.771486	0.713951	0.536207	0.523277	0.541229	0.652256	0.743306	1.17083	0.809171	0.698383	0.838692	0.982268	0.7897	0.652843	0.655432	0.665098	0.484574
673	634	8.145	TG(18:4/18:3/21:0)	TG	C60 H102 O6	TG(18:4/18:3/21:0)+Li	B	0.530544	0.624402	0.539359	0.570997	0.450618	0.589809	0.620627	0.661276	0.731734	0.720814	0.950418	0.883039	1.21199	1.1655	1.03597	1.48656	1.35538	1.26125	1.43198	1.34995	1.00688	1.47187	1.26731	1.15216	1.3126	0.890109	0.862554	0.917381	0.857624	0.805698	0.848105	0.835582	0.93554	0.936709	0.896652	1.05113	1.08625	1.15135	0.848082	0.737261	0.953243	0.66597
674	635	9.563	TG(19:0/18:1/18:1)	TG	C58 H108 O6	TG(19:0/18:1/18:1)+NH4	A	0.549374	0.609652	0.537062	0.590231	0.53206	0.459277	0.556898	0.563098	0.490181	0.61466	0.592812	0.592137	0.586994	0.622655	0.58853	0.579956	0.548719	0.554429	0.684367	0.648761	0.59449	0.556064	0.75689	0.543489	0.644813	1.03554	1.19291	0.872926	1.02016	0.987387	1.0276	1.15264	1.02732	1.5319	1.2125	1.1279	0.974122	1.21886	1.20825	1.22389	1.20036	0.98114
675	636	9.94	TG(19:0/18:1/18:2)	TG	C58 H106 O6	TG(19:0/18:1/18:2)+NH4	B	1.12774	0.251733	0.271806	1.15907	0.295347	0.208495	0.820907	0.282815	0.306913	0.316919	1.26289	0.462247	1.29132	3.74136	0.925267	2.53343	2.07415	1.09259	0.54814	0.712649	0.436219	0.700983	0.297118	0.975541	0.557965	1.34149	0.845482	0.165338	0.39096	0.325009	0.0644413	0.567113	0.457075	2.22654	1.20535	0.538756	1.6262	1.84493	0.830657	1.55807	2.31384	1.34472
676	637	9.337	TG(19:1/18:1/18:1)	TG	C58 H106 O6	TG(19:1/18:1/18:1)+NH4	A	0.600258	0.715731	0.695449	0.651944	0.62564	0.582337	0.725807	0.657554	0.652346	0.743538	0.713255	0.661526	0.63627	0.708976	0.664528	0.687748	0.662385	0.581092	0.765217	0.720304	0.636315	0.636368	0.708698	0.653181	0.72841	1.0465	1.23091	0.964932	1.21863	1.05448	0.931355	1.01822	1.02654	1.06649	0.943275	0.9595	0.917235	1.05523	0.906516	0.87343	0.917892	0.794146
677	638	9.123	TG(19:1/18:1/18:2)	TG	C58 H104 O6	TG(19:1/18:1/18:2)+NH4	A	0.817911	0.795112	0.790464	0.811697	0.713888	0.701212	0.81377	0.764747	0.730685	0.822752	0.773578	0.705662	0.722977	0.749953	0.892962	0.790384	0.654992	0.775087	0.705657	0.724774	0.674069	0.670734	0.698449	0.63547	0.708482	1.21073	1.29152	1.08827	1.19313	1.03374	0.856877	0.883354	1.02435	1.01621	0.887136	0.845596	0.871993	0.893331	0.826535	0.688971	0.786773	0.690163
678	639	8.866	TG(19:1/18:2/18:2)	TG	C58 H102 O6	TG(19:1/18:2/18:2)+NH4	A	0.886535	1.16276	1.09587	1.05713	0.914574	0.917165	0.810497	1.07066	0.948017	1.0634	1.06176	0.940845	0.895953	0.964233	0.897083	0.791669	0.903919	0.854016	0.781548	0.803023	0.736442	0.0122487	0.914246	0.697074	0.821146	0.985664	1.16409	0.89756	1.05941	0.876574	0.671774	0.792395	0.81145	0.859485	0.811625	0.712728	0.727607	0.776144	0.677173	0.582177	0.725627	0.515503
679	640	8.65	TG(19:1/18:2/18:3)	TG	C58 H100 O6	TG(19:1/18:2/18:3)+NH4	A	0.994252	1.33277	1.39022	1.17855	1.13908	1.12926	1.26893	1.23252	1.16343	1.35191	1.04864	1.03308	0.997944	1.00563	1.0173	0.834553	0.776396	0.720958	0.810142	0.817576	0.750412	0.951298	0.931747	0.757802	0.868398	0.491224	0.00527241	0.52659	0.560163	0.533622	0.28069	0.31369	0.404412	0.404222	0.334005	0.317759	0.332593	0.328526	0.319123	0.234925	0.280493	0.212886
680	641	7.583	TG(19:1/18:3/18:3)	TG	C58 H98 O6	TG(19:1/18:3/18:3)+Li	B	0.356032	0.483989	0.511752	0.504467	0.335297	0.754845	0.671747	0.680448	0.659854	0.970578	1.24515	0.933259	1.26634	1.43597	1.12765	1.39238	1.6036	0.971644	1.20628	1.1463	1.07416	1.60812	1.39022	0.877395	1.0633	0.712102	0.832413	0.761978	0.73289	0.786013	0.64577	0.633097	0.792856	1.25268	0.814167	0.829723	0.792924	0.994558	0.88102	0.593739	0.740727	0.418599
681	642	7.852	TG(19:1/18:3/18:3)	TG	C58 H98 O6	TG(19:1/18:3/18:3)+Li	B	0.4758	0.405479	0.37155	0.397329	0.391689	0.475013	0.818075	0.558698	0.670435	0.966818	1.08169	0.870425	0.852645	1.13814	0.999498	1.19707	1.18376	0.71061	0.833089	0.883976	0.854281	1.38664	1.01697	0.457705	0.858134	1.11121	1.06218	0.935428	1.0217	0.879206	1.40524	1.42336	1.49747	1.37316	1.1992	1.81501	1.90369	1.1095	1.16999	1.2541	1.52884	0.914355
682	643	8.153	TG(19:2/18:3/18:3)	TG	C58 H96 O6	TG(19:2/18:3/18:3)+NH4	B	1.13482	1.85279	1.81983	1.4093	1.40095	1.36107	1.51412	1.71541	1.26591	1.81866	0.982397	1.09886	1.13118	1.14574	1.08809	0.678267	0.708505	0.801627	0.834212	0.814788	0.786141	1.11802	1.23847	0.717037	0.689125	0.0708898	0.100529	0.251589	0.0330623	0.0626575	0.000366716	0.001445	0.000634963	0.00052036	0.00041529	0	0	0.000839349	0.00207911	0.00039598	0	0.000773621
683	644	8.4	TG(19:3/18:2/18:2)	TG	C58 H98 O6	TG(19:3/18:2/18:2)+NH4	A	1.02322	1.4137	1.61239	1.12903	1.24412	1.50219	1.63403	1.72467	1.32696	1.75473	1.23608	1.27316	1.14925	1.28564	1.06391	1.00494	0.832605	0.83218	0.962567	0.88513	0.891843	1.31718	1.36765	0.951769	0.888548	0.1713	0.223075	0.291008	0.167876	0.18006	0.0386933	0.0597156	0.0836186	0.0605424	0.0542472	0.0475013	0.0450072	0.0492257	0.0522121	0.0320036	0.045739	0.0415691
684	645	8.284	TG(19:4/13:0/19:4)	TG	C54 H88 O6	TG(19:4/13:0/19:4)+(CH3CH2)3NH	B	0.427707	0.337534	0.696352	0.810019	0.479957	2.26426	0.409589	0.53119	1.37714	0.852063	2.45681	3.34636	1.90394	1.36177	3.0359	1.21581	1.24707	2.5002	1.26252	2.31898	1.78074	1.72746	2.90857	2.45174	4.09924	0.579144	0.657034	0.827363	1.09173	1.50996	0.789543	0.77355	1.08972	0.992119	0.90285	1.32624	0.840693	0.549714	0.984071	1.13464	0.638629	1.03004
685	646	7.766	TG(19:5/18:2/18:2)	TG	C58 H94 O6	TG(19:5/18:2/18:2)+Li	B	0.880146	0.408396	0.413537	0.514679	0.534146	0.802332	1.89712	1.36137	0.949261	2.16019	3.28668	0.74434	0.927576	2.40418	1.99548	1.90961	1.86896	1.52244	1.64695	1.00943	1.81694	2.03799	2.27498	1.72119	1.8849	2.95366	2.81345	1.5119	2.10109	0.867087	1.49064	1.21048	1.65842	1.00184	1.36058	2.11777	1.79007	1.94316	1.56509	1.53729	2.24351	1.64884
686	647	8.669	TG(20:0/12:0/12:0)	TG	C47 H90 O6	TG(20:0/12:0/12:0)+NH4	B	1.63371	1.49373	2.04287	2.7512	1.62469	1.36647	2.49123	1.56262	1.2108	0.808473	0.81786	0.909766	0.850527	0.727823	0.828581	1.00799	0.883089	0.813366	1.41539	1.1244	1.85556	1.03363	0.604736	0.939962	0.814516	1.37982	1.09084	1.32764	1.44013	1.62124	1.04357	1.78288	1.28319	1.57232	1.44333	1.23652	1.3297	1.36159	2.32713	1.91215	2.1038	1.75827
687	648	9.648	TG(20:0/18:1/18:1)	TG	C59 H110 O6	TG(20:0/18:1/18:1)+NH4	A	0.60835	0.670996	0.600185	0.619563	0.599707	0.567009	0.607553	0.684582	0.655855	0.700764	0.83701	0.795591	0.87646	0.866129	0.868493	1.02186	0.956658	0.905636	1.01592	0.952034	0.934648	1.07274	0.985451	0.875117	0.935966	0.777322	0.905774	0.807951	0.838919	0.765029	0.824924	0.905915	0.912481	1.00017	0.899858	1.0841	0.965753	1.14291	0.979228	0.92793	0.998492	0.787318
688	649	9.024	TG(20:0p/17:3/18:3)	TG	C58 H100 O5	TG(20:0p/17:3/18:3)+Li	B	0.917828	0.965957	0.851943	0.796935	0.778761	1.03643	1.03547	1.13232	1.20884	1.06074	1.03533	1.21288	1.05781	1.06845	0.983061	1.28056	0.954242	0.800061	1.02131	0.943448	1.14988	1.2614	1.41741	0.913095	0.856876	0.878581	1.00074	0.917435	0.841237	0.803967	0.663948	0.658163	0.925506	0.768986	0.722895	0.68687	1.05997	0.712689	0.991283	0.522803	0.693708	0.604885
689	650	9.483	TG(20:1/18:1/18:1)	TG	C59 H108 O6	TG(20:1/18:1/18:1)+NH4	A	0.832938	0.902654	0.820469	0.889708	0.762858	0.770284	0.849755	0.849693	0.869241	0.925234	0.91847	0.874707	0.875697	0.892715	0.867503	0.882977	0.879937	0.832061	0.900362	0.837156	0.808221	0.944588	0.650345	0.796514	0.839083	1.05152	1.1434	0.908088	1.06129	0.97532	0.962116	0.966708	1.06231	0.923834	0.990046	1.05621	0.957005	1.01459	0.882666	1.01873	0.94305	0.811798
690	651	8.743	TG(20:2/18:2/18:2)	TG	C59 H102 O6	TG(20:2/18:2/18:2)+NH4	A	1.27145	1.55651	1.50579	1.44117	1.3376	1.00898	1.11758	1.0972	1.01591	1.11199	0.927119	0.902821	0.871612	0.896537	0.918923	0.853415	0.779103	0.790839	0.839044	0.813372	0.766732	0.930596	0.928599	0.80043	0.810184	0.718311	0.761983	0.674094	0.682168	0.722563	0.531424	0.546875	0.647328	0.582765	0.589725	0.56317	0.507905	0.586613	0.626166	0.441617	0.533699	0.394937
691	652	8.516	TG(20:3/18:2/18:2)	TG	C59 H100 O6	TG(20:3/18:2/18:2)+NH4	A	1.33321	1.51195	1.51533	1.40609	1.30534	0.956905	1.15852	1.0452	0.990408	1.23024	0.899731	0.912396	0.906545	0.920118	0.868746	0.794399	0.705564	0.661722	0.774364	0.751646	0.727096	0.87492	0.98083	0.720112	0.711112	0.421943	0.437272	0.442317	0.378185	0.380788	0.284441	0.300097	0.429235	0.349077	0.291911	0.292324	0.350014	0.329504	0.303842	0.216619	0.288607	0.228108
692	653	10.143	TG(21:1/21:1/21:1)	TG	C66 H122 O6	TG(21:1/21:1/21:1)+NH4	A	0.632291	0.768526	0.418193	0.593128	0.695476	0.639175	0.738222	0.584722	0.743188	0.85107	0.705643	0.776249	0.416343	0.777607	0.662238	0.474596	0.441346	0.417393	0.4413	0.892971	0.320347	0.549288	0.0859694	0.544665	0.727887	1.53184	1.45438	1.14519	1.51757	1.25123	0.926419	0.915911	1.34846	1.09804	1.32176	1.13118	0.916183	1.12103	1.00219	0.7141	0.971232	0.711035
693	654	9.403	TG(22:0/18:2/18:2)	TG	C61 H110 O6	TG(22:0/18:2/18:2)+NH4	B	2.37067	0.208621	2.56538	2.58239	2.38657	2.72453	2.97396	0.112183	0.210431	3.13532	0.175454	2.27079	2.332	0.113389	0.197887	1.45484	0.133327	0.0970219	0.117326	1.86096	0.122398	0.133354	0.094411	1.28279	1.43603	3.6592	0.220409	0.177401	3.74408	3.16125	0.232835	0.244588	2.62898	2.1214	0.20473	2.40131	2.23921	1.9639	1.89538	0.156648	0.171737	1.45122
694	655	10.407	TG(22:0/18:2/24:0)	TG	C67 H126 O6	TG(22:0/18:2/24:0)+NH4	B	0.488213	0.589387	0.466642	0.511166	0.523329	0.463571	0.613265	0.652701	0.624587	0.676305	0.70062	0.805591	0.670493	0.852132	0.752067	0.726859	0.643835	0.549508	0.820929	0.849822	0.600477	0.699191	0.444711	0.623829	0.678858	0.930547	1.21863	0.798128	0.941605	0.96054	0.875813	1.05637	1.1288	1.06934	1.16122	1.15693	0.786674	1.22361	1.02428	0.903921	1.06718	0.828447
695	656	9.087	TG(22:0/18:3/18:3)	TG	C61 H106 O6	TG(22:0/18:3/18:3)+NH4	A	2.29185	4.42659	4.30237	4.00578	2.02889	1.36518	0.719742	2.27572	2.49893	1.9054	0.194952	1.12782	1.22002	1.20884	0.29346	0.932882	0.821323	1.09163	0.923947	1.09617	0.633741	0.932798	1.08217	0.839634	0.648197	0.285921	0.126493	0.181099	0.207404	0.170418	0.0870333	0.030031	0.0999623	0.0578603	0.0344577	0.0641134	0.0121584	0.0738777	0.105845	0.145086	0.0265272	0.0301587
696	657	9.706	TG(24:0/18:2/18:2)	TG	C63 H114 O6	TG(24:0/18:2/18:2)+NH4	A	0.822334	1.03013	0.989631	0.908105	0.823355	1.05253	1.08653	1.10943	1.09263	1.18067	0.91759	0.955334	0.857408	0.862508	0.842909	0.688144	0.682411	0.629099	0.666938	0.734535	0.625233	0.686212	0.627121	0.609972	0.57919	1.27463	1.35075	1.01088	1.41142	1.20135	0.835896	0.910681	1.18248	0.72732	0.870029	0.880552	0.839718	0.82536	0.657657	0.50491	0.589082	0.531974
697	658	9.413	TG(24:0/18:2/18:3)	TG	C63 H112 O6	TG(24:0/18:2/18:3)+NH4	A	1.81318	2.309	1.99425	1.87314	1.75777	1.59247	1.7973	1.9454	1.55717	1.87099	1.13191	1.58019	1.13494	1.27075	1.22434	0.845636	0.872776	0.846383	0.922755	1.0241	0.85157	0.923887	0.81009	0.73109	0.788131	0.332145	0.362041	0.416518	0.309745	0.309734	0.128217	0.129585	0.190281	0.113682	0.113642	0.114955	0.1175	0.108338	0.0903924	0.0635312	0.0879652	0.0687667
698	659	10.574	TG(24:0/18:2/24:0)	TG	C69 H130 O6	TG(24:0/18:2/24:0)+NH4	A	0.502744	0.617809	0.505736	0.537921	0.508578	0.554393	0.702639	0.767622	0.678708	0.729375	0.728193	0.865069	0.646268	0.911694	0.75991	0.598075	0.587679	0.651898	0.869415	0.839381	0.600908	0.67914	0.575045	0.640534	0.762303	0.928777	1.26167	0.853309	1.03495	0.925881	0.756014	0.915067	1.12934	1.1064	1.07576	1.02914	0.749498	1.13029	0.917274	0.738732	1.01097	0.6646
699	660	9.328	TG(24:0/18:3/18:3)	TG	C63 H110 O6	TG(24:0/18:3/18:3)+NH4	B	2.02412	2.66856	2.68065	2.16817	2.1376	1.71389	2.00458	1.87219	1.56148	1.9005	1.26108	1.40766	1.1671	1.11793	1.19359	0.83819	0.837503	0.75083	0.921132	0.989649	0.753212	0.743831	0.712932	0.708028	0.690193	0.123287	0.215597	0.280643	0.0520589	0.102827	0	0.0194542	0.015204	0	0.00378476	0	0.0096001	0	0	0	0	0
700	661	10.899	TG(24:0/23:1/23:1)	TG	C73 H138 O6	TG(24:0/23:1/23:1)+NH4	B	0.605751	0.901432	0.779947	0.746867	0.811638	0.827689	1.08301	0.974949	0.85257	1.04345	0.902606	1.13864	0.830116	1.06351	0.881542	0.703634	0.712922	0.607769	0.96774	0.787761	0.630966	0.74664	0.878369	1.20067	1.00322	0.929634	1.15024	0.800974	1.00418	0.857683	0.587722	0.843744	0.965675	0.686397	0.809517	0.712956	0.60717	0.782535	0.729502	0.549087	0.585255	0.464045
701	662	10.168	TG(25:0/16:0/16:0)	TG	C60 H116 O6	TG(25:0/16:0/16:0)+NH4	B	0.448002	0.523737	0.406219	0.437908	0.454308	0.243705	0.340786	0.361122	0.293308	0.275324	0.323103	0.348773	0.279314	0.354877	0.28223	0.300648	0.341743	0.312419	0.363073	0.395706	0.212867	0.237707	0.158488	0.24815	0.243541	0.75304	0.762504	0.578724	0.8428	0.706009	1.1139	1.29073	1.11472	2.01341	1.42539	1.69069	1.40728	1.64107	1.76236	1.90704	2.08337	1.61354
702	663	9.083	TG(25:0/16:1/18:2)	TG	C62 H114 O6	TG(25:0/16:1/18:2)+NH4	B	1.1808	0.732084	0.092657	0.872807	0.782811	0.798189	1.44457	1.18398	0.713573	0.974026	2.1858	0.889874	1.36279	1.31562	0.781733	0.800755	0.837305	0.58957	1.43029	0.964681	1.18347	0.460919	0.513355	0.486993	0.842528	2.51318	0.799847	1.66742	0.68436	2.13891	2.00374	1.99578	0.687482	1.33305	0.377323	1.47609	0.845505	0.811649	0.435263	1.18124	0.524968	1.25649
703	664	10.146	TG(25:0/18:1/18:1)	TG	C64 H120 O6	TG(25:0/18:1/18:1)+NH4	A	0.590391	0.642182	0.57591	0.564935	0.609835	0.536866	0.707009	0.603751	0.65202	0.694491	0.639167	0.651528	0.630212	0.687613	0.613486	0.591541	0.577512	0.565931	0.680804	0.699396	0.52328	0.544974	0.404142	0.587175	0.66302	1.11579	1.22097	0.922616	1.15401	1.03035	0.945445	1.00675	1.18796	1.12506	1.11043	1.13198	0.939917	1.13046	1.0383	0.885131	1.03254	0.867048
704	665	9.97	TG(25:0/18:1/18:2)	TG	C64 H118 O6	TG(25:0/18:1/18:2)+NH4	A	0.540015	0.597075	0.559443	0.608851	0.566265	0.586446	0.761484	0.627613	0.665165	0.815559	0.721794	0.693761	0.684527	0.663743	0.665361	0.610402	0.57682	0.561164	0.685196	0.700296	0.566922	0.558974	0.506221	0.557172	0.687882	1.3172	1.37961	1.11972	1.34072	1.24558	0.962464	1.03872	1.30167	0.934997	1.05425	1.11773	1.01364	1.14599	0.824724	0.71309	0.880198	0.736392
705	666	9.795	TG(25:0/18:2/18:2)	TG	C64 H116 O6	TG(25:0/18:2/18:2)+NH4	A	0.624646	0.758605	0.748894	0.68436	0.660598	0.78329	0.880598	0.832724	0.861809	0.925531	0.836485	0.739464	0.645038	0.723244	0.712345	0.53358	0.546437	0.448349	0.602159	0.72195	0.482739	0.451684	0.451941	0.481873	0.528923	1.44771	1.68028	1.22703	1.60424	1.4117	0.971031	0.97554	1.37056	0.848413	1.05886	0.95959	0.975295	0.889112	0.81763	0.573972	0.667859	0.577538
706	667	9.614	TG(25:0/18:2/18:3)	TG	C64 H114 O6	TG(25:0/18:2/18:3)+NH4	B	1.37361	2.14666	2.35002	1.83643	1.46513	1.81908	2.00134	2.10673	1.52677	2.07936	1.18835	1.63455	1.23791	1.32224	1.19149	0.617705	0.819963	0.713473	0.906187	0.923826	0.664742	0.645121	0.733048	0.787808	0.630126	0.391117	0.641685	0.494879	0.437314	0.424686	0.194973	0.20682	0.335043	0.279007	0.281923	0.223629	0.28513	0.313789	0.152579	0.0933392	0.133398	0.124714
707	668	9.975	TG(25:0/18:2/20:2)	TG	C66 H120 O6	TG(25:0/18:2/20:2)+NH4	B	0.577021	0.732406	0.707308	0.718242	0.783375	0.65698	0.948875	0.689546	0.800891	1.00666	0.662203	0.535677	0.633612	0.511149	0.63397	0.456672	0.722812	0.431274	0.702707	0.756998	0.461096	0.367414	0.404391	0.647855	0.598518	1.25305	1.42076	1.07641	1.32271	1.28308	0.850739	1.03621	1.16846	0.902343	1.01146	0.925389	0.943418	0.559532	0.456099	0.700642	0.700313	0.529026
708	669	10.439	TG(25:0/18:3/23:0)	TG	C69 H128 O6	TG(25:0/18:3/23:0)+NH4	B	0.796423	1.11554	0.827079	0.861976	0.865372	0.694647	1.14345	1.09626	0.967491	1.10953	1.10116	1.33604	0.936153	1.13769	1.09092	0.958147	0.961132	0.817109	1.14237	1.22849	0.879588	1.01727	0.639826	0.87791	1.02298	0.975487	1.07723	0.776012	0.785143	0.796856	0.551387	0.624998	0.7514	0.895724	0.918538	0.868981	0.455054	0.703643	0.412097	0.495107	0.568432	0.538368
709	670	8.533	TG(25:1/10:0/10:0)	TG	C48 H90 O6	TG(25:1/10:0/10:0)+NH4	B	0.369389	0.117909	0.300529	0.247747	0.282894	0.4391	0.554099	0.131613	0.170211	0.00210584	0.75019	0.357838	0.579284	0.287867	0.437628	0.465666	0.340295	0.255951	0.418224	0.372098	0.414036	0.335283	0.292739	0.362343	0.615099	1.3643	1.4054	0.982525	1.31101	1.57064	1.62567	1.82735	1.31367	2.36342	1.43715	1.54213	1.64822	1.96645	1.61245	2.63776	1.90762	1.24692
710	671	10.324	TG(25:1/18:0/18:0)	TG	C64 H122 O6	TG(25:1/18:0/18:0)+NH4	B	0.458605	0.533828	0.52562	0.513145	0.521882	0.515157	0.743848	0.695962	0.643518	0.731237	0.66228	0.719932	0.619277	0.712832	0.711255	0.580767	0.585454	0.564232	0.724654	0.752645	0.51964	0.576207	0.33726	0.604092	0.742414	1.21142	1.3142	0.902666	1.17615	1.08194	1.04484	1.21484	1.22602	1.21431	1.17458	1.23844	0.912224	1.20205	1.02592	1.00283	1.13784	0.9577
711	672	7.918	TG(25:3/10:0/10:0)	TG	C48 H86 O6	TG(25:3/10:0/10:0)+NH4	B	0.0610417	0.105172	0.10604	0.149888	0.0598835	0.333826	0.229709	0.120288	0.111011	0.237354	0.0635614	0.055537	0.0581417	0.295268	0.231259	0.225275	0.0645601	0.0854042	0.248527	0.240421	0.0439904	0.0716526	0.295712	0.0929691	0.419035	1.54759	1.2214	0.844282	1.26715	0.133662	0.994544	0.972438	0.809411	1.07654	0.867729	0.592014	1.04443	0.976139	0.893213	0.834808	1.68701	0.851531
712	673	6.97	TG(25:5/15:2/15:2)	TG	C58 H94 O6	TG(25:5/15:2/15:2)+Li	B	0.463742	0.531415	0.563445	0.50498	0.412514	0.511171	0.683039	0.622674	0.629046	0.783303	0.862633	0.740971	0.904031	0.820262	0.845484	0.842067	0.885614	0.644647	0.896427	0.838947	0.519332	0.693037	0.788261	0.521806	0.574334	1.1066	1.16442	0.820797	1.41486	1.15873	0.770753	0.773774	1.14485	1.12354	0.934992	0.703135	0.773903	0.826901	0.647666	0.481751	0.538644	0.359804
713	674	8.822	TG(25:5/8:0/18:1)	TG	C54 H92 O6	TG(25:5/8:0/18:1)+(CH3CH2)3NH	B	1.86938	0.603094	0.0546246	1.37925	0.467282	1.63225	1.59352	1.05242	2.11464	0.615828	4.02894	5.47434	3.89007	2.764	4.19321	2.3477	2.24196	3.98021	4.22129	5.47321	3.55331	3.46791	5.28987	4.74707	7.43216	0.293698	0.611849	0.907076	0.96081	1.37855	0.650152	0.810747	0.559185	0.531342	1.20302	0.692513	1.29775	0.611163	1.65215	2.60923	0.708649	1.88798
714	675	9.672	TG(26:0/15:2/15:2)	TG	C59 H106 O6	TG(26:0/15:2/15:2)+H	B	1.17338	1.1477	1.00879	1.05368	1.13202	1.23912	1.04734	1.63766	1.18975	1.4169	1.31015	1.29369	1.89255	1.61488	1.58614	1.47264	1.39674	1.76997	1.47927	1.42876	1.85222	1.27752	1.06222	1.31878	1.37783	0.979426	1.36435	1.5985	0.923368	0.60486	1.0151	1.7186	0.932856	1.04102	1.04845	1.0655	1.00999	1.17827	1.00865	1.16925	1.09427	1.36502
715	676	10.408	TG(26:0/18:0/18:1)	TG	C65 H124 O6	TG(26:0/18:0/18:1)+NH4	B	0.510144	0.623215	0.492912	0.509254	0.529215	0.611041	0.786387	0.79512	0.824599	0.856678	0.852478	0.894941	0.848146	0.974016	0.846853	0.898081	0.80413	0.72239	0.95535	0.995893	0.841565	0.905238	0.634986	0.889587	1.01633	0.854686	1.04197	0.832758	0.856421	0.852033	0.739882	0.86968	1.00845	0.840256	0.916658	0.941344	0.693515	0.998199	0.846091	0.76836	0.875088	0.694766
716	677	10.22	TG(26:0/18:1/18:1)	TG	C65 H122 O6	TG(26:0/18:1/18:1)+NH4	A	0.599751	0.661124	0.572574	0.59157	0.547824	0.608595	0.734539	0.732996	0.725186	0.812549	0.763261	0.791804	0.776777	0.873621	0.821693	0.785369	0.707192	0.650452	0.845484	0.848123	0.735831	0.816102	0.535258	0.739228	0.828428	0.999429	1.08273	0.871884	1.0077	0.902553	0.81842	0.869203	1.08168	0.98325	0.938055	1.06978	0.876514	1.10441	0.900541	0.784443	0.930645	0.774899
717	678	9.888	TG(26:0/18:2/18:2)	TG	C65 H118 O6	TG(26:0/18:2/18:2)+NH4	A	0.812118	0.989829	0.970205	0.957638	0.855122	1.09793	1.14291	1.06016	1.07575	1.29145	0.996095	0.99378	0.869613	0.876963	0.904305	0.68269	0.717299	0.655332	0.850837	0.780184	0.682565	0.772379	0.65928	0.676737	0.699233	1.09308	1.24186	0.947776	1.14657	1.01451	0.749338	0.751061	1.07032	0.724685	0.811224	0.76291	0.702027	0.750518	0.614842	0.488828	0.55359	0.456708
718	679	9.526	TG(26:0/18:3/18:3)	TG	C65 H114 O6	TG(26:0/18:3/18:3)+NH4	B	2.02595	2.60303	2.38801	2.17708	2.06866	1.70698	1.78224	1.68825	1.41108	1.94667	1.13917	1.46871	1.12868	1.06376	1.08603	0.731667	0.717706	0.696719	0.948169	1.01537	0.598191	1.05689	0.651271	0.631916	0.735415	0.138113	0.194697	0.228257	0.09819	0.127326	0	0.00988524	0.0643814	0	0	0	0	0	0	0	0	0
719	680	10.053	TG(26:1/18:1/18:1)	TG	C65 H120 O6	TG(26:1/18:1/18:1)+NH4	B	0.669097	0.766069	0.706233	0.719905	0.666389	0.765466	0.856297	0.857627	0.906917	0.938062	0.914571	0.815529	0.797723	0.872335	0.869306	0.719887	0.736788	0.67576	0.786683	0.846358	0.712859	0.75097	0.654289	0.716506	0.806809	1.12946	1.22959	0.88145	1.17102	1.05103	0.837045	0.818721	1.18827	0.8608	0.944227	0.89869	0.895424	0.936248	0.791088	0.619805	0.753527	0.629426
720	681	9.728	TG(26:1/18:2/18:2)	TG	C65 H116 O6	TG(26:1/18:2/18:2)+NH4	B	1.55652	2.33877	2.20482	1.72616	1.78183	1.95422	1.78554	1.70032	1.67981	1.8252	1.55388	1.53695	1.20728	1.19154	1.21485	0.849579	0.970096	0.730547	0.996251	1.01514	0.889661	0.925378	0.792367	0.864646	0.847423	1.08339	0.777152	0.81745	0.966304	0.950823	0.525887	0.54759	0.775092	0.436413	0.572821	0.528645	0.520233	0.281184	0.2825	0.310209	0.350294	0.302717
721	682	7.895	TG(26:2/8:0/9:0)	TG	C46 H84 O6	TG(26:2/8:0/9:0)+NH4	B	0.158081	0.425238	0.269942	0.226917	0.176965	0.044913	0.367833	0.414423	0.407335	0.606311	0.50339	0.73149	0.50021	0.540059	0.354233	0.542789	0.578705	0.217552	0.688993	1.05787	0.699617	0.462906	0.390579	0.328027	0.449071	0.880548	0.982705	0.702284	1.2216	1.00411	0.557307	0.896697	1.1592	1.56411	0.879261	1.05637	1.63619	1.51524	1.22973	1.09566	2.68831	0.972604
722	683	7.769	TG(26:4/10:0/10:0)	TG	C49 H86 O6	TG(26:4/10:0/10:0)+NH4	B	0.563602	0.917608	0.744774	0.890275	0.619793	0.581041	0.571586	0.577247	0.557622	0.682811	0.480459	0.549184	0.537886	0.751358	0.575216	0.540377	0.594054	0.426187	0.674275	0.498014	0.50703	0.575142	0.668088	0.482997	0.500525	1.62118	1.69911	1.25513	1.71205	1.42	1.05283	1.04109	1.49315	1.34428	1.11769	1.23747	1.14844	1.18847	1.05419	0.810234	1.2366	0.848021
723	684	7.916	TG(26:4/8:0/18:3)	TG	C55 H92 O6	TG(26:4/8:0/18:3)+NH4	B	1.46393	2.57491	2.3438	1.8995	1.49294	1.17327	1.60152	1.44972	1.10624	1.5101	0.981845	1.0501	0.873656	0.95133	0.969792	0.716617	0.622188	0.582663	0.618059	0.58383	0.675545	0.869243	1.06235	0.688788	0.75303	0.0846328	0.126256	0.182158	0.113904	0.105168	0.0140138	0.0213365	0.039128	0.0269111	0.0190098	0.0213732	0.0276389	0.0208928	0.0186002	0.0137561	0.0517973	0.025738
724	685	10.33	TG(27:0/18:1/18:1)	TG	C66 H124 O6	TG(27:0/18:1/18:1)+NH4	B	0.393432	0.500215	0.485656	0.477406	0.520876	0.347462	0.524427	0.494518	0.453396	0.550368	0.493745	0.552312	0.417194	0.557654	0.534288	0.398323	0.411795	0.358961	0.519631	0.572034	0.329748	0.3749	0.205997	0.389849	0.502259	1.30067	1.40257	0.944615	1.30591	1.20445	1.15618	1.39055	1.32155	1.31811	1.35662	1.37264	0.923317	1.3544	1.14645	1.1146	1.23787	1.01684
725	686	10.2	TG(28:0/18:1/18:2)	TG	C67 H124 O6	TG(28:0/18:1/18:2)+NH4	B	0.799397	0.828372	0.772902	0.767969	0.614929	0.717655	0.87227	0.857234	0.747745	0.894482	0.787571	0.856213	0.841687	0.991782	0.869891	0.726081	0.679356	0.803137	0.781191	0.792806	0.554388	0.731264	0.459767	0.671195	0.951518	1.12481	1.2035	0.734837	1.20752	1.01843	0.810356	0.806084	1.08069	0.874198	0.953175	0.967375	0.7596	0.863419	0.791845	0.54544	0.723374	0.623458
726	687	10.046	TG(28:0/18:2/18:2)	TG	C67 H122 O6	TG(28:0/18:2/18:2)+NH4	B	0.869944	1.18844	1.31072	0.987744	0.840066	1.01688	1.11034	0.988944	1.22244	1.21571	0.997336	0.946145	0.835505	0.913805	0.853851	0.756356	0.615004	0.686639	0.732248	0.77933	0.682322	0.710215	0.675963	0.724623	0.654693	1.18822	1.15613	0.870631	1.01551	1.1865	0.816811	0.896713	1.09274	1.01412	1.02049	0.659213	0.770999	0.627296	0.663112	0.580577	0.587468	0.531814
727	688	9.137	TG(29:2/10:0/18:3)	TG	C60 H106 O6	TG(29:2/10:0/18:3)+NH4	B	1.15686	1.45791	1.38138	1.30883	1.25168	1.05246	1.25184	1.04738	0.992867	1.20819	0.804122	0.83348	0.885566	0.811148	0.881823	0.700262	0.640368	0.584753	0.612802	0.657035	0.546719	0.604315	0.687314	0.586474	0.685885	0.966987	1.21171	0.927853	1.09352	0.997046	0.632516	0.616937	0.876659	0.768968	0.769536	0.681096	0.638215	0.5844	0.718979	0.486361	0.504598	0.501262
728	689	10.924	TG(30:0/18:0/18:0)	TG	C69 H134 O6	TG(30:0/18:0/18:0)+NH4	B	0.373816	0.495608	0.384865	0.446853	0.373787	0.281818	0.397102	0.570516	0.355601	0.367232	0.540455	0.658435	0.582192	0.767476	0.642458	0.820426	0.788735	0.571801	1.08608	0.897241	0.618876	0.782329	0.953957	0.743073	0.865301	0.708944	0.991085	0.734552	0.624019	0.614253	0.801357	1.0483	0.975689	1.30184	1.08032	1.24459	0.837896	1.40946	1.2957	1.06505	1.6109	0.970119
729	690	5.326	TG(30:0p)	TG	C33 H62 O5	TG(30:0p)+NH4	D	1.26309	0.776166	1.02083	0.944961	0.987341	1.32528	1.26022	1.1166	0.901285	1.11374	1.19501	1.21809	1.07477	1.25064	1.31034	1.28649	1.29172	1.36718	1.30865	1.1701	1.63001	1.37672	1.29123	1.51412	2.02423	1.40205	1.1822	1.11428	0.8592	1.02496	1.32944	1.26304	1.1419	0.842942	1.19461	1.32628	1.2449	1.17866	1.44375	1.50667	1.41032	1.39398
730	691	10.577	TG(30:1/19:1/19:1)	TG	C71 H132 O6	TG(30:1/19:1/19:1)+NH4	B	0.640362	0.836755	0.676146	0.640259	0.74569	0.687545	1.13345	0.955024	0.798298	0.974596	0.835752	1.08581	0.769601	1.08792	0.904722	0.672665	0.742338	0.682527	0.836646	0.991954	0.666353	0.714344	0.634495	0.692285	0.953832	0.812108	1.16737	0.791841	0.956309	0.792524	0.549394	0.720906	0.937046	0.606745	0.9243	0.829891	0.517868	0.867091	0.68234	0.528625	0.690249	0.498099
731	692	5.882	TG(32:3)	TG	C35 H60 O6	TG(32:3)+H	D	1.98179	1.53609	1.65212	1.33874	1.67231	1.47468	1.25547	1.16403	1.35305	0.844602	1.16597	1.43246	1.3429	1.3062	1.24651	1.57066	1.51949	1.76079	1.50357	1.217	2.12527	1.64929	1.31753	1.95217	1.62118	1.22726	1.14925	1.72009	0.784024	0.995623	1.30528	1.34131	1.17425	0.627199	1.29204	1.44923	1.45324	1.3396	1.76432	1.48342	1.57632	2.15025
732	693	7.38	TG(33:2)	TG	C36 H64 O6	TG(33:2)+(CH3CH2)3NH	D	0.179119	0.191109	0.138986	0.167146	0.133969	0.550339	0.583878	0.733582	0.573843	0.747052	0.916732	0.739974	0.750386	0.847846	0.718874	0.773322	1.00325	0.532901	0.551295	0.792165	0.509213	0.629672	0.876863	0.346516	0.565418	0.13553	0.123163	0.157673	0.0874091	0.0894025	0.0587724	0.0742346	0.0807155	0.0903992	0.0802075	0.0564173	0.0707257	0.0687897	0.0615217	0.0627396	0.0586917	0.0288131
733	694	6.317	TG(34:0p)	TG	C37 H70 O5	TG(34:0p)+H	D	1.36043	1.13621	0.491745	1.26542	1.15631	1.17859	1.00277	0.636117	1.45267	1.09084	0.60889	0.752291	0.966042	1.20603	1.11538	1.49455	0.959433	0.692073	1.49345	0.988222	1.02411	1.0639	0.901378	0.835013	1.35791	1.26427	1.14462	0.939171	0.793971	1.53548	1.05588	0.955317	1.05041	0.704704	0.786828	1.38569	0.778065	0.841249	1.36963	1.04466	1.16951	1.53375
734	695	5.13	TG(34:0p)	TG	C37 H70 O5	TG(34:0p)+NH4	D	0.945666	0.954782	1.3382	0.203243	0.609226	0.446217	0.823977	0.882217	0.309943	0.895127	0.284859	0.277652	0.282168	0.423454	0.349253	0.309643	0.259433	0.248164	0.283911	0.214218	0.289302	0.418726	0.428997	0.274125	0.364118	0.669387	0.609765	0.265732	0.893845	0.328291	0.275693	0.300821	0.312087	0.715055	0.266505	0.357789	0.442842	0.448622	0.29371	0.250451	0.375449	0.248681
735	696	6.263	TG(34:1p)	TG	C37 H68 O5	TG(34:1p)+K	D	1.00294	0.851167	0.770231	0.852885	0.747217	0.81818	0.822075	0.804912	0.773031	0.75124	0.854273	0.916068	1.14686	0.897969	0.935537	1.02132	0.943641	0.839526	0.942564	0.989729	0.910109	1.06445	1.11317	0.718186	0.938309	1.39215	1.20988	1.07038	1.39431	1.27292	1.36472	1.09498	1.16075	1.05027	1.06041	0.9472	0.924446	1.07783	0.993427	0.985359	1.08218	0.853794
736	697	4.287	TG(34:3)	TG	C37 H64 O6	TG(34:3)+H	C	1.28587	1.30022	0.618024	0.80547	0.46873	0.990615	1.13501	0.781131	0.930099	0.971933	1.22042	0.884503	0.778281	0.823056	0.737607	0.79104	0.863482	0.728364	0.663273	0.932459	0.896258	0.841477	0.893322	0.784288	0.74131	1.39508	1.1626	0.793583	0.865548	0.981327	0.856344	0.82923	0.930239	0.848375	0.840415	1.13619	1.0244	1.10512	0.782064	0.723124	0.996078	0.876371
737	698	4.253	TG(35:6)	TG	C38 H60 O6	TG(35:6)+Li	D	1.24505	0.525192	0.604632	0.624351	0.456063	0.944422	0.778096	1.03296	0.927177	0.92114	0.970709	0.926489	0.868218	0.95095	0.918617	0.748474	0.888676	1.15207	0.709664	1.06471	1.02143	0.990977	0.815882	0.724406	0.909276	1.07734	1.17235	0.946994	0.929817	1.03469	0.821289	1.09677	0.989312	0.959405	0.954415	0.997574	1.3573	1.60604	0.953422	1.08862	1.17364	1.12194
738	699	5.492	TG(36:1)	TG	C39 H72 O6	TG(36:1)+K	C	0.516463	0.75168	0.646702	0.559373	0.401264	0.543897	0.669921	0.699299	0.604296	0.726277	0.757776	0.587308	0.688726	0.595631	0.525926	0.5314	0.442022	0.452868	0.46898	0.557844	0.360297	0.599458	0.833473	0.331575	0.400016	1.43455	1.39836	0.671033	1.11012	1.13896	0.642491	0.582538	0.958957	1.21701	0.675096	0.712517	0.737551	0.723524	0.463422	0.519676	0.6224	0.333362
739	700	6.68	TG(36:1p)	TG	C39 H72 O5	TG(36:1p)+H	D	0.432693	0.423904	0.333308	0.332467	0.421585	0.261315	0.417957	0.482313	0.364876	0.494575	0.576396	0.440191	0.705326	0.551359	0.41736	0.746452	0.583157	0.504989	0.741325	0.7727	0.970037	1.42368	1.55685	0.763982	1.09553	1.01944	1.34896	0.498942	0.869513	0.680621	0.954843	0.97817	0.826541	1.61721	0.972882	0.999499	1.05345	1.19945	0.674888	0.533571	1.04351	0.561756
740	701	5.343	TG(36:2p)	TG	C39 H70 O5	TG(36:2p)+NH4	C	10.2942	1.3691	0.960191	9.26795	1.01981	1.08991	0.94658	1.87696	0.627414	1.76783	1.42931	2.51004	1.37495	1.69978	1.04626	2.45837	0.958866	1.60485	1.51081	1.10398	2.28791	1.17905	10.1131	6.89676	1.38798	2.16051	1.16954	0.967736	0.773248	0.812786	1.70782	1.29275	1.72615	2.35299	0.966496	1.90306	1.04882	9.1819	1.16656	1.87357	7.2893	1.2672
741	702	9.06	TG(36:3)	TG	C39 H68 O6	TG(36:3)+NH4	C	3.71383	0.228029	3.20758	6.42017	1.91747	0.304047	2.05301	0.498526	2.64673	1.30487	5.65005	2.8719	3.58208	1.21792	0.227404	0.932657	1.19847	1.79564	0.758324	3.12126	3.84704	2.88622	2.97701	5.22188	1.23058	1.43614	0.554575	1.62732	1.61279	1.46721	0.608595	2.93765	1.04637	0.963741	1.4411	1.57861	1.09731	1.32028	1.0435	3.34966	0.210615	4.05796
742	703	4.007	TG(36:5)	TG	C39 H64 O6	TG(36:5)+H	D	0.392982	0.902152	1.22456	0.736209	0.664677	0.327148	0.430804	1.00259	0.358504	0.701448	0.779066	1.06286	0.307472	0.368293	0.367671	0.288187	0.276755	0.257872	0.589775	0.713802	0.332074	0.362712	0.361504	0.289379	0.807237	0.730362	0.652852	0.253297	0.794274	0.416051	0.397526	0.353592	1.08488	0.817961	0.929547	0.406271	0.431854	0.388489	0.277345	0.272442	0.460963	0.331977
743	704	4.91	TG(37:3)	TG	C40 H70 O6	TG(37:3)+K	D	0.629072	0.338588	0.669977	0.16733	0	0.329451	0.351767	0.171294	0.16876	0.4891	1.25579	1.23801	1.31625	0.499763	0.233316	0.0932949	0.129912	0	0.0917983	0	0.0581787	0.34245	0.152136	0.0855195	0.0840009	7.86537	7.74271	1.00012	2.5851	3.51903	0.80007	0.768514	1.17037	0.710811	0.733806	1.12314	0.77934	0.823468	0.742232	1.12634	0.690239	0.246237
744	705	5.512	TG(37:3)	TG	C40 H70 O6	TG(37:3)+NH4	D	0.856302	0.0511807	0.720461	0	0.0500298	2.16852	0.514467	0.732879	1.06197	1.22341	1.28985	0.745379	1.1524	2.01445	1.88309	0.50382	0.255957	0.164159	0.453748	0.513061	0.635889	1.01604	0.692835	0.574512	0.809223	1.64774	0.790646	0.0667154	0.283572	0.82987	0.193423	0.29446	0.126836	0.124038	0.191405	0.201347	0.326238	0.266742	0.380524	0.126576	0.301026	0.168071
745	706	6.381	TG(37:3)	TG	C40 H70 O6	TG(37:3)+NH4	C	0.366516	0.449834	0.43851	0.460165	0.310688	0.450981	0.560206	0.603425	0.439663	0.633902	0.632575	0.517331	0.623435	0.720994	0.607439	0.559072	0.49467	0.358909	0.445094	0.504949	0.361048	0.507781	0.507454	0.328908	0.381938	1.68451	1.59444	0.938394	1.71191	1.36137	0.731509	0.705499	1.06742	1.26881	1.03108	0.734407	0.717986	1.12177	0.670981	0.493601	0.561229	0.349312
746	707	5.582	TG(37:6)	TG	C40 H64 O6	TG(37:6)+(CH3CH2)3NH	D	0.451368	0.471257	0.569172	0.483194	0.355076	0.663846	0.684364	0.695165	0.822184	0.794115	0.690485	0.592287	0.628097	0.72716	0.63871	0.575409	0.530766	0.456683	0.554864	0.542707	0.476387	0.746697	0.868111	0.436873	0.511731	1.18698	1.19596	0.779302	1.07008	0.915552	0.729197	0.741401	1.00072	0.949915	0.813132	0.968133	0.941789	0.968509	0.690321	0.641464	0.87478	0.618166
747	708	5.381	TG(37:7)	TG	C40 H62 O6	TG(37:7)+(CH3CH2)3NH	D	0.543218	0.55889	0.623111	0.509704	0.428056	0.952391	0.819297	0.839656	0.848578	1.01388	1.00578	0.863534	0.91739	1.06113	1.02821	1.05754	0.924963	0.764863	0.804031	0.887822	0.867212	1.14469	1.3063	0.868469	0.91122	0.787278	0.754919	0.437372	0.607701	0.557987	0.57041	0.595267	0.727409	0.703742	0.637798	0.746983	0.799972	0.798554	0.615852	0.611701	0.886383	0.55849
748	709	7.18	TG(38:1p)	TG	C41 H76 O5	TG(38:1p)+NH4	D	0.483771	0.681812	0.364675	0.453446	0.478241	0.538985	0.610395	0.458412	1.07277	0.674864	0.725339	0.47411	0.471998	0.469996	0.466959	0.780304	0.674216	0.434733	0.811419	0.708337	0.941587	0.955239	0.903445	0.669962	0.843725	1.43497	1.45805	0.9009	1.10593	1.03911	1.05494	1.10849	0.911407	1.75599	1.19442	0.696825	0.847334	0.943451	1.00121	0.694335	0.922384	0.512625
749	710	3.835	TG(38:4)	TG	C41 H70 O6	TG(38:4)+K	D	0.472291	0.0336332	0.364575	0.0656926	0.0593955	0.389145	0.383134	0.277985	0.150198	0.374676	1.20921	0.590353	0.563508	0.512594	0.638938	0.126399	0.0743161	0.0613144	0.0871697	0.0406532	0.0255087	0.172259	0.0933978	0	0.0363565	3.34607	2.77219	0.0798319	0.319027	1.24451	0.0895407	0.243674	0.13119	0.121138	0.0822425	0.0509895	0.0299296	0.0859299	0.0499357	0.157062	0.0774539	0.0150161
750	711	5.095	TG(38:5)	TG	C41 H68 O6	TG(38:5)+K	D	1.98024	1.17206	1.64364	1.27518	1.07605	1.24246	0.942881	0.849442	0.828578	1.05065	1.15152	1.23155	1.09596	0.979409	1.06198	0.734547	0.694092	0.557664	0.627518	0.678406	0.412216	0.790839	0.486156	0.422037	0.445496	1.82474	1.5237	0.75994	0.979063	1.03351	0.775361	0.726967	0.751602	0.735662	0.681808	0.785299	0.704619	0.681279	0.615915	0.848032	1.08567	0.609078
751	712	6.831	TG(4:0/12:0/20:3)	TG	C39 H68 O6	TG(4:0/12:0/20:3)+H	B	1.43562	1.53301	1.34686	1.44012	1.37974	0.978737	0.947825	0.897353	0.910885	0.803369	0.825145	1.0314	0.982109	0.961179	0.969891	1.21772	1.19505	1.34953	1.34083	0.988347	1.48739	1.16334	1.11337	1.3772	1.11104	1.39499	1.48342	1.67714	1.38108	1.41922	1.37323	1.40493	1.14254	1.21909	1.14537	1.24504	1.27154	1.30966	1.39731	1.20791	1.38212	1.34655
752	713	6.978	TG(4:0/16:0/18:2)	TG	C41 H74 O6	TG(4:0/16:0/18:2)+NH4	A	0.530831	0.551967	0.540724	0.528391	0.332235	0.444904	0.528761	0.583823	0.598304	0.675254	0.862743	0.648028	0.972732	0.951111	0.874889	1.12492	0.989036	0.816813	0.94144	0.928933	0.798958	1.08668	1.40999	0.746269	0.941333	0.604688	0.668857	0.517705	0.580656	0.504873	0.403381	0.419768	0.583676	0.682187	0.472505	0.56797	0.55507	0.628659	0.409608	0.325612	0.451835	0.260584
753	714	5.509	TG(4:0/16:1/18:1)	TG	C41 H74 O6	TG(4:0/16:1/18:1)+K	B	0.639516	0.469583	0.777166	0.471766	0.249621	0.53618	0.281281	0.524822	0.230174	0.522001	1.34489	0.98595	1.57703	0.832426	0.859728	0.29117	0.438363	0.380284	0.451436	0.419087	0.317384	0.863782	0.625208	0.557313	0.589535	2.41518	2.04828	0.52765	0.742094	0.98607	0.71846	0.72046	1.01729	0.729245	0.752315	1.00274	1.12568	0.778771	0.725935	1.3337	1.03404	0.355578
754	715	4.751	TG(4:0/16:2/18:2)	TG	C41 H70 O6	TG(4:0/16:2/18:2)+K	B	1.5891	0.557339	1.49113	0.56617	0.227278	1.05987	0.48991	0.633028	0.437567	0.642561	1.90135	1.48301	1.6799	1.00377	1.2033	0.218803	0.205268	0.169773	0.206683	0.272647	0.176799	0.539588	0.265909	0.251306	0.324727	2.13843	1.74951	0.234856	0.745287	1.10862	0.317526	0.317276	0.382752	0.355105	0.373853	0.374777	0.357517	0.31267	0.258674	0.335846	0.396512	0.154645
755	716	6.214	TG(4:0/16:2/18:2)	TG	C41 H70 O6	TG(4:0/16:2/18:2)+Na	B	1.04387	0.854838	0.947359	0.926509	0.659305	0.981635	0.858744	0.910425	1.00876	0.915181	1.02766	1.07895	1.20716	1.26993	1.10259	1.10419	1.07667	0.815945	0.891966	0.901909	0.808986	1.13098	1.16542	0.694088	0.913246	1.43785	1.34642	1.01137	1.12577	1.09973	0.756691	0.692231	0.942339	0.479713	0.718036	0.936012	0.948587	0.940061	0.607425	0.48842	0.677216	0.404846
756	717	6.594	TG(4:0/16:2/18:3)	TG	C41 H68 O6	TG(4:0/16:2/18:3)+H	B	0.456958	0.506069	0.494789	0.454363	0.313804	0.561403	0.606376	0.649409	0.830699	0.725706	0.928003	1.08304	1.06485	1.28382	0.892212	1.43915	1.05208	0.864641	0.992745	1.04719	0.975119	1.20539	1.1899	0.687936	1.11786	0.766827	0.855361	0.966099	0.771864	0.726646	0.557181	0.554581	0.673711	0.899013	0.927158	0.879479	0.568866	0.683498	0.452861	0.393308	0.640414	0.321474
757	718	4.45	TG(4:0/16:2/18:3)	TG	C41 H68 O6	TG(4:0/16:2/18:3)+K	B	4.73691	1.43609	3.72646	0.976012	0.628861	0.701798	0.588893	0.514838	0.385347	0.605809	0.845058	0.766869	0.955517	0.47624	0.49516	0.28132	0.240022	0.181484	0.217574	0.211707	0.178772	0.386827	0.438347	0.196998	0.236379	0.138831	0.139594	0.058801	0.109039	0.0798719	0.0625631	0.0560574	0.0626548	0.0656618	0.0589312	0.0596064	0.0621358	0.0564955	0.0532167	0.039777	0.0742228	0.059657
758	719	5.855	TG(4:0/16:2/18:3)	TG	C41 H68 O6	TG(4:0/16:2/18:3)+NH4	B	2.32655	2.95341	2.76923	2.22957	1.92203	0.832563	1.09208	1.00167	0.926604	1.01868	0.654455	0.57572	0.71563	0.730197	0.614025	0.537195	0.367315	0.39349	0.480357	0.452948	0.350661	0.599045	0.792892	0.40669	0.451659	0.0584341	0.0813045	0.0376621	0.0489172	0.0330421	0.0237798	0.0344433	0.0530181	0.0234575	0.0304721	0.0307701	0.0489211	0.0389305	0.0150344	0.0206904	0.0391418	0.025379
759	720	6.979	TG(4:0/16:2/20:3)	TG	C43 H72 O6	TG(4:0/16:2/20:3)+H	B	0.792064	0.853515	0.841525	0.838143	0.564376	0.635229	0.647682	0.782318	0.767848	0.692859	0.899407	0.906624	1.29911	1.11226	1.07974	1.47106	1.30668	1.1626	1.35286	1.1154	1.13193	1.43902	1.6202	1.05941	1.30496	0.785843	0.875042	0.829768	0.873131	0.776204	0.693502	0.683341	0.799447	0.987794	0.727025	0.840744	0.813463	0.939014	0.644686	0.522569	0.719213	0.45362
760	721	6.214	TG(4:0/16:2/20:5)	TG	C43 H68 O6	TG(4:0/16:2/20:5)+H	B	1.0504	0.859768	0.952823	0.931853	0.663107	0.987297	0.863697	0.915676	1.01439	0.920459	1.03359	1.08517	1.21413	1.21963	1.10895	1.11056	1.08288	0.820651	0.89711	0.907111	0.813652	1.1375	1.17214	0.698091	0.918514	1.44614	1.3543	1.02307	1.13227	1.10607	0.761056	0.696223	0.947774	0.48248	0.722177	0.941411	0.954058	0.945483	0.610929	0.491237	0.690613	0.407181
761	722	7.597	TG(4:0/17:0/18:1)	TG	C42 H78 O6	TG(4:0/17:0/18:1)+NH4	B	0.393014	0.464223	0.771347	1.45981	0.291693	1.01688	0.544351	0.491009	0.454836	0.487306	0.659469	0.525189	0.53123	0.79249	0.55869	0.480119	0.467855	0.582031	0.506596	0.667782	0.521668	0.571734	0.660676	0.887649	0.873226	1.2759	1.51062	1.21224	1.37087	1.21174	0.922275	1.1887	1.11563	2.33352	1.31831	1.02707	1.12134	1.49615	1.36652	1.01672	1.4502	0.690397
762	723	7.207	TG(4:0/17:0/18:2)	TG	C42 H76 O6	TG(4:0/17:0/18:2)+NH4	A	0.303252	0.345001	0.340656	0.374373	0.251062	0.208051	0.24509	0.289401	0.307745	0.369703	0.346706	0.282647	0.378268	0.416376	0.406204	0.435584	0.439296	0.236032	0.413118	0.393061	0.0860655	0.472421	0.557624	0.259408	0.128026	1.9872	2.18479	1.71708	2.05925	1.67838	1.0911	1.41416	1.20107	2.29989	1.29691	1.00467	0.971144	1.31415	1.1514	0.993988	0.947423	0.785328
763	724	6.832	TG(4:0/17:1/18:2)	TG	C42 H74 O6	TG(4:0/17:1/18:2)+NH4	B	0.27432	0.371928	0.342417	0.298898	0.219775	0.185484	0.254187	0.232934	0.275358	0.27346	0.357873	0.311594	0.331593	0.38863	0.344953	0.370379	0.365709	0.239154	0.334611	0.349326	0.236872	0.326691	0.425093	0.20321	0.264855	2.91781	2.99328	2.38474	3.01588	2.29651	0.931035	0.97031	1.10088	1.54089	0.980839	0.756881	0.8068	1.06031	0.697416	0.524339	0.620808	0.368122
764	725	6.45	TG(4:0/17:2/18:2)	TG	C42 H72 O6	TG(4:0/17:2/18:2)+NH4	B	0.456916	0.558682	0.613159	0.529172	0.396733	0.196986	0.312383	0.27412	0.27249	0.288375	0.258225	0.211143	0.232402	0.299438	0.278906	0.266928	0.214524	0.143664	0.210964	0.189366	0.153065	0.246849	0.251772	0.137457	0.18317	3.17612	3.19479	2.46314	3.13386	2.38686	0.709433	0.685112	1.04688	1.12751	0.838306	0.67114	0.708741	0.798676	0.518484	0.422828	0.444323	0.289687
765	726	6.447	TG(4:0/17:2/20:5)	TG	C44 H70 O6	TG(4:0/17:2/20:5)+H	B	0.546604	0.647104	0.665817	0.658705	0.413843	0.292912	0.310542	0.246128	0.284487	0.278408	0.194047	0.225905	0.331876	0.368745	0.273845	0.297813	0.236977	0.18869	0.20605	0.182686	0.263309	0.249111	0.274864	0.198966	0.222843	3.69561	3.72415	3.16216	3.76201	2.73043	0.777547	0.945875	1.16624	1.3023	0.933215	0.88274	0.853999	1.05203	0.507602	0.518163	0.524311	0.457628
766	727	7.566	TG(4:0/17:3/18:1)	TG	C42 H72 O6	TG(4:0/17:3/18:1)+Na	B	1.56988	1.72043	1.65461	1.48537	1.76551	1.74994	1.20644	1.67647	1.30859	1.02609	1.63468	1.63037	1.8579	1.42193	1.14014	1.38558	1.40906	1.55935	1.48215	1.18592	2.08831	1.48395	1.0151	2.15793	1.15192	1.61776	1.46111	2.3275	1.5727	1.26233	2.24296	2.32514	1.94719	1.62408	1.95754	1.99884	2.48729	1.90292	1.60709	1.47536	1.49618	2.955
767	728	7.401	TG(4:0/18:1/18:1)	TG	C43 H78 O6	TG(4:0/18:1/18:1)+NH4	A	0.970211	1.14738	0.794738	0.974776	0.760268	1.51689	1.44654	1.30455	1.46574	1.8029	1.70518	1.47299	1.39015	2.00387	1.66757	1.37363	1.77545	1.55532	1.68829	1.58315	1.47302	1.96676	2.11798	1.39611	1.44794	1.77728	1.95534	1.70961	1.82117	1.55447	1.22401	1.22774	1.4629	2.0979	1.3502	1.4589	1.49848	1.86141	1.38485	1.1376	1.3795	0.984745
768	729	5.182	TG(4:0/18:1/18:2)	TG	C43 H76 O6	TG(4:0/18:1/18:2)+K	A	0.159617	0	0.608927	0.0159024	0	0.244898	0.30567	0.244567	0.164746	0.151541	0.183817	0.141037	0.221644	1.7751	1.38223	0.348455	0.283932	0.124733	0.154674	0.217865	0.168383	0.385198	0.406854	0.172182	0.153554	5.13106	2.2993	0.0737848	1.70635	2.81537	0.824041	0.961797	1.72674	0.682241	0.985332	1.08569	1.17608	1.18841	0.933298	0.822612	1.65569	0.723938
769	730	7.029	TG(4:0/18:1/18:2)	TG	C43 H76 O6	TG(4:0/18:1/18:2)+NH4	A	0.375215	0.430519	0.412344	0.400754	0.261632	0.447881	0.456165	0.493351	0.554308	0.59708	0.673409	0.496645	0.606526	0.721062	0.669676	0.735664	0.688151	0.483937	0.629703	0.570238	0.545312	0.721052	0.885289	0.46707	0.597085	1.42935	1.56258	1.12026	1.36679	1.11292	0.695828	0.620888	1.04776	1.18577	0.78414	0.816006	0.809592	0.982735	0.670918	0.534182	0.570694	0.38531
770	731	6.201	TG(4:0/18:1/21:6)	TG	C46 H74 O6	TG(4:0/18:1/21:6)+NH4	B	0.248445	0.183715	0.16339	0.244085	0.0634198	0.638649	0.845593	0.710766	1.55196	1.14293	1.40699	0.485007	0.629788	0.880338	0.829524	1.27688	0.380741	0.270851	0.360121	0.547074	0.299641	0.870136	0.570838	0.146269	0.330892	0.238707	0.254661	0.125186	0.155546	0.170311	0.0628521	0.0205002	0.0738362	0.101258	0.100635	0.0807701	0.051317	0.0833831	0.0965496	0.0744163	0.0684073	0.0377003
771	732	4.813	TG(4:0/18:2/18:2)	TG	C43 H74 O6	TG(4:0/18:2/18:2)+K	A	0.438228	0.00921239	1.47229	0.0732142	0	0.00105711	0.454098	0.388845	0.271017	0.182088	0.273002	0.264973	0.246669	1.75823	1.28203	0.320195	0.210437	0.137148	0.214592	0.208161	0.177355	0.436287	0.347873	0.203895	0.185084	5.04614	2.80835	0.0955094	1.75697	2.59913	0.905831	0.78557	1.51281	0.841853	0.935687	0.80992	0.833775	0.854861	0.737077	0.515201	1.04281	0.617966
772	733	6.651	TG(4:0/18:2/18:2)	TG	C43 H74 O6	TG(4:0/18:2/18:2)+NH4	A	0.466613	0.678504	0.55337	0.505326	0.357718	0.469149	0.513123	0.566527	0.577228	0.734871	0.574576	0.380024	0.480658	0.635369	0.509191	0.577389	0.504944	0.390266	0.45852	0.511461	0.38412	0.475833	0.676604	0.293188	0.438642	1.45019	1.62638	1.12939	1.64901	1.11631	0.642725	0.548799	0.980099	0.910586	0.716056	0.651131	0.580886	0.797496	0.499175	0.407	0.491543	0.277067
773	734	3.527	TG(4:0/8:0/15:2)	TG	C30 H52 O6	TG(4:0/8:0/15:2)+NH4	B	1.26986	0.899832	1.04593	1.03485	0.833274	1.23692	1.15084	0.884397	1.32825	0.834048	1.47298	1.45542	0.913682	1.3559	0.870884	0.902776	1.15365	1.10191	0.876277	0.831684	0.99696	1.51334	1.21019	0.916088	0.846783	0.998142	1.24897	1.09142	0.843599	0.951995	0.886031	0.776861	0.889197	1.07071	1.05887	1.02435	0.908963	0.879778	1.02571	0.800021	1.01536	1.04389
774	735	5.967	TG(40:4)	TG	C43 H74 O6	TG(40:4)+K	D	0.913109	0.890835	1.10627	0.841126	0.55105	0.762915	0.641715	0.823243	0.64319	0.919679	1.10548	1.08448	1.18825	0.790476	1.01387	0.762013	0.753706	0.534251	0.651546	0.867728	0.236821	0.501941	0.493657	0.341187	0.339047	1.19348	1.37213	0.545122	0.720883	0.85223	0.755287	0.846007	0.774632	1.5115	0.8401	0.59963	0.516914	0.634177	0.633677	0.701741	0.581118	0.355173
775	736	6.285	TG(40:5)	TG	C43 H72 O6	TG(40:5)+NH4	D	1.65841	2.38956	2.46024	2.05623	1.38222	1.01774	0.821962	0.69788	0.862871	1.05039	0.367816	0.511557	0.444156	0.780532	0.367263	0.484185	0.463168	0.257406	0.357976	0.375108	0.435273	0.605417	0.645635	0.782466	0.293564	0.0967798	0.0826883	0.54733	0.808217	0.203772	0.0536958	0.461761	0.0249852	0.467447	0.469662	0.484376	0.179095	0.479079	0.306021	0.258771	0.382639	0.34314
776	737	4.755	TG(40:7)	TG	C43 H68 O6	TG(40:7)+K	D	1.80151	0.598692	1.67208	0.709262	0.308524	1.32342	0.578928	0.649458	0.560888	0.787212	1.88531	1.72703	2.2792	1.28779	1.48305	0.441666	0.430639	0.426151	0.388133	0.453741	0.483476	0.949098	0.512794	0.681861	0.788798	2.12792	1.82134	0.355862	0.684379	1.05417	0.501913	0.536825	0.519969	0.382735	0.446272	0.613572	0.569483	0.461895	0.459583	0.665483	0.75893	0.402391
777	738	7.246	TG(41:2p)	TG	C44 H80 O5	TG(41:2p)+NH4	D	1.33322	1.28873	1.37951	1.09693	0.948702	1.10784	0.975656	1.10138	1.06277	1.07038	0.660191	0.884693	0.904169	0.776633	0.748882	0.849446	0.710354	0.665728	0.740899	0.655527	0.8123	0.891023	1.00143	0.754461	0.615592	1.38974	1.38912	0.840656	1.51206	1.35559	0.967133	0.942462	0.940155	1.15735	0.98768	0.885577	0.918387	1.00491	0.603955	0.551445	1.14799	0.985742
778	739	6.691	TG(42:5)	TG	C45 H76 O6	TG(42:5)+NH4	D	1.05541	2.0382	1.18581	0.779165	0.723803	1.59254	1.23157	1.3948	1.18752	1.68055	1.17103	0.797278	0.801981	0.835957	0.767185	0.688192	0.601155	0.427291	0.435281	0.632229	0.542314	0.717237	0.842238	0.425391	0.456436	0.101401	0.0765434	0.1119	0.0267823	0.0258007	0.0333447	0.0535865	0.0434137	0.000603598	0.00103218	0	0	0.0282614	0	0.00122964	0.000455794	0
779	740	7.251	TG(42:5)	TG	C45 H76 O6	TG(42:5)+NH4	C	0.0329875	0.0239715	0.024159	0.0526259	0.0209091	0	0	0.0168843	0	0.0344477	0.0376023	0.0478776	0.0338051	0.0380859	0	0.10586	0.0416155	0.0469174	0.0521359	0.0585644	0	0.10858	0.0348197	0.0246845	0.0651958	1.68287	1.9217	1.19636	1.91374	1.48187	2.02126	2.05192	3.31297	3.7543	2.50226	2.41305	2.535	3.01602	2.42035	1.65046	1.79361	1.10579
780	741	5.169	TG(42:6)	TG	C45 H74 O6	TG(42:6)+K	C	0.377033	0	1.12049	0.0240626	0	0.609132	0.476406	0.370632	0.309165	0.160204	0.441032	0.570035	0.561339	3.86954	3.10267	0.987842	0.837052	0.520425	0.459641	0.540741	0.547751	1.51568	0.966492	0.713071	0.735585	7.04284	2.92744	0.0539623	1.35845	2.15608	1.25511	1.52214	1.77564	0.609865	0.895912	1.90033	1.71943	1.68824	1.52955	1.58238	3.37825	1.94911
781	742	5.059	TG(42:8)	TG	C45 H70 O6	TG(42:8)+(CH3CH2)3NH	D	0.0818914	0.207785	0.11881	0.149074	0.0603036	0.524888	2.36788	0.655924	0.380303	2.06569	3.59648	0.465436	0.540851	2.07775	1.33429	0.619727	0.725722	0.16842	0.2025	0.733878	0.188715	0.591232	0.190508	0.0626571	0.15472	0.282892	0.646165	0.285855	0.477299	0.226928	0.133653	0.654896	1.62691	0.782597	0.719789	0.631856	1.0677	0.635224	0.724604	0.804849	0.701392	0.239312
782	743	6.05	TG(43:8)	TG	C46 H72 O6	TG(43:8)+NH4	D	0.335772	0.252162	0.185752	0.182748	0.135057	1.28589	1.38842	1.17356	1.16243	1.72489	2.12931	1.16102	1.01008	1.69738	1.69284	0.900062	0.886059	0.529388	0.600369	1.04741	0.692249	0.774885	1.15087	0.484602	0.806358	0.318219	0.261876	0.10301	0.179337	0.173076	0.0859989	0.116184	0.312766	0.111419	0.1189	0.152956	0.29239	0.144351	0.114059	0.123129	0.119063	0.0809818
783	744	7.258	TG(44:6)	TG	C47 H78 O6	TG(44:6)+NH4	D	0.0402925	0.0832362	0.035125	0.0812905	0.0735602	0.0346017	0.0208659	0.0814548	0.0177942	0.082991	0.0404082	0.0414824	0.0806347	0.0398541	0.0390424	0.0651177	0.0528743	0.0687721	0.0661034	0.08952	0.0783926	0.116842	0.0944051	0.093768	0.0602153	1.57193	1.78222	1.22442	1.75795	1.61031	1.68139	1.68628	3.31716	2.74131	2.21275	2.4549	2.30651	2.56543	2.12845	2.07881	1.74812	1.37169
784	745	6.895	TG(44:7)	TG	C47 H76 O6	TG(44:7)+NH4	D	0.0170638	0.0793186	0.0360585	0.0815024	0.0458801	0.0237458	0.0169108	0.0639903	0.0167015	0.0370471	0.0665308	0.0275422	0.0551102	0.0707162	0.0455586	0.0373598	0.0537507	0.0170898	0.0447971	0.0529377	0.0541673	0.0418272	0.0736315	0.0592335	0.0347018	2.49498	2.25633	1.65402	2.54623	1.98692	1.47716	1.44578	3.01405	2.27043	1.73759	1.73641	2.21008	1.95812	1.23518	0.847097	1.12284	0.757531
785	746	6.523	TG(44:8)	TG	C47 H74 O6	TG(44:8)+NH4	D	0	0.108761	0.0279081	0.0629154	0.0265856	0	0	0.0190227	0.0226082	0.0226937	0.0236935	0	0.0335466	0.0348948	0.0223111	0.0364502	0.0316274	0.0290913	0	0.0183622	0.0166181	0.0455579	0.0241787	0.0293038	0.040004	2.7527	2.48953	1.65285	2.54204	1.86039	1.13272	1.22742	3.18464	1.71014	1.65213	1.86598	2.57825	1.82386	1.17506	0.683543	0.966402	0.711448
786	747	4.866	TG(46:7)	TG	C49 H80 O6	TG(46:7)+Na	D	0.951669	1.77551	0.256285	1.51203	0.749657	0.918799	1.11864	0.862256	1.17928	1.59859	0.950376	0.72711	0.726051	0.687814	0.670222	0.516095	0.520257	0.616614	0.629698	0.760605	0.195311	0.388701	0.53207	0.201652	0.202854	0.496826	1.00271	1.14914	1.24905	0.944486	0.555133	0.659046	0.799172	0.838121	0.902833	0.530955	0.58172	0.633773	0.375624	0.314599	0.292664	0.252391
787	748	7.769	TG(47:5p)	TG	C50 H86 O5	TG(47:5p)+(CH3CH2)3NH	D	0.097862	0.141304	0.0772183	0.131803	0.101689	0.187493	0.348999	0.288351	0.25736	0.357101	0.913255	0.323563	0.399492	0.493753	0.485013	0.476279	0.450745	0.277172	0.359038	0.492704	0.279295	0.350009	0.533983	0.208458	0.327098	0.18559	0.154584	0.114042	0.0962495	0.124941	0.0881159	0.11532	0.193556	0.182954	0.11223	0.105184	0.153119	0.117716	0.0991926	0.132088	0.09732	0.0513056
788	749	7.074	TG(47:6)	TG	C50 H84 O6	TG(47:6)+(CH3CH2)3NH	D	0.0251507	0.0592094	0.0220419	0.122764	0.0547454	0.253977	0.405692	0.30965	0.293634	0.452271	1.37156	0.132933	0.193417	0.772466	0.630833	0.412057	0.777289	0.0497459	0.204715	0.70158	0.114951	0.32894	0.302762	0.0384287	0.0779148	0.680458	0.449134	0.108176	0.176815	0.175893	0.218177	0.1705	0.752309	0.376163	0.2227	0.114654	0.484035	0.130663	0.142775	0.247462	0.0731206	0.0269894
789	750	7.511	TG(47:6p)	TG	C50 H84 O5	TG(47:6p)+(CH3CH2)3NH	D	0.131757	0.105063	0.0955352	0.123125	0.0937764	0.230055	0.448807	0.314691	0.320662	0.551882	1.1721	0.40931	0.385419	0.678623	0.58983	0.438855	0.479275	0.215441	0.311566	0.570116	0.264291	0.299758	0.390999	0.148856	0.285483	0.288017	0.188652	0.0828719	0.110799	0.138696	0.070987	0.104374	0.268206	0.141559	0.128792	0.116726	0.218549	0.123612	0.118474	0.136734	0.0895832	0.0724542
790	751	7.755	TG(48:7)	TG	C51 H84 O6	TG(48:7)+H	D	2.35047	2.16478	1.96116	2.19504	1.9822	1.0178	0.368933	0.703873	0.421482	0.00642918	0.493644	0.681453	1.08105	0.676585	0.83996	0.4577	0.724278	0.615572	0.88347	0.678888	1.19026	1.25324	0.491138	1.38099	0.352103	4.52655	4.18641	3.73148	1.6602	3.28033	3.62867	2.74595	3.05492	1.12812	3.41928	3.92943	3.25558	3.02809	3.13186	2.58796	4.76918	4.85152
791	752	8.08	TG(49:5p)	TG	C52 H90 O5	TG(49:5p)+(CH3CH2)3NH	D	0.139559	0.133691	0.0968781	0.149553	0.13684	0.26076	0.503154	0.356012	0.34871	0.522225	1.36992	0.370209	0.456288	0.679816	0.586674	0.464361	0.437364	0.318074	0.407452	0.600941	0.340582	0.454713	0.569531	0.249347	0.413029	0.176097	0.149503	0.110702	0.0844702	0.116419	0.0676534	0.0972155	0.174465	0.130153	0.0967308	0.0819204	0.132008	0.0861352	0.0919813	0.138145	0.0818694	0.057003
792	753	7.428	TG(49:6)	TG	C52 H88 O6	TG(49:6)+(CH3CH2)3NH	D	0.220067	0.143314	0.223054	0.122984	0.0996862	0.288187	0.63192	0.365178	0.385846	1.09806	1.62497	0.507794	0.289097	0.82043	0.728421	0.453887	0.740051	0.282474	0.329102	0.84139	0.232705	0.4381	0.485068	0.272707	0.155111	0.57525	0.651794	0.30388	0.179954	0.416407	0.160489	0.130486	0.71716	0.491212	0.160601	0.225703	0.376625	0.253807	0.486477	0.34054	0.378372	0.196005
793	754	7.797	TG(49:6p)	TG	C52 H88 O5	TG(49:6p)+(CH3CH2)3NH	D	0.161993	0.156866	0.121511	0.156799	0.139378	0.24681	0.475736	0.361212	0.354861	0.491484	0.936204	0.365668	0.397344	0.580176	0.523108	0.453073	0.445279	0.257839	0.347153	0.535369	0.289749	0.410405	0.521542	0.216688	0.334085	0.22984	0.19647	0.107325	0.0855144	0.126178	0.0767582	0.1171	0.241037	0.136885	0.118794	0.12529	0.192129	0.130817	0.119355	0.15864	0.119234	0.0939251
794	755	7.106	TG(49:7)	TG	C52 H86 O6	TG(49:7)+(CH3CH2)3NH	D	0.138225	0.134942	0.121797	0.105442	0.106401	0.223237	0.625689	0.237451	0.233321	0.899685	1.21523	0.246291	0.211229	0.805285	0.621513	0.342324	0.589993	0.117342	0.179691	0.750326	0.126711	0.328717	0.342984	0.0969952	0.140459	0.424993	0.533059	0.149252	0.198022	0.25175	0.154064	0.214087	0.784707	0.289266	0.216629	0.255582	0.473594	0.173597	0.172529	0.270997	0.131915	0.0856694
795	756	5.95	TG(49:9)	TG	C52 H82 O6	TG(49:9)+(CH3CH2)3NH	D	0.135225	0.408459	0.1079	0.074036	0.0667808	0.543982	1.40011	0.437418	0.564493	1.74709	3.7889	0.339594	0.379268	1.36071	0.936899	0.570821	0.610519	0.123546	0.260933	0.830879	0.318566	0.293577	0.43725	0.185803	0.269731	0.646374	0.500524	0.127349	0.206123	0.327139	0.33682	0.312179	0.93469	0.255739	0.262307	0.716627	0.740587	0.625223	0.407433	0.455629	0.680535	0.355025
796	757	6.503	TG(51:10)	TG	C54 H84 O6	TG(51:10)+(CH3CH2)3NH	D	0.530607	0.371373	0.262831	0.298688	0.292479	0.380136	1.13275	0.653742	0.382345	1.19179	1.77186	0.449878	0.251726	0.680264	0.647448	0.891765	0.555139	0.104512	0.252316	0.633468	0.089104	0.322639	0.41967	0.153064	0.0833088	0.830433	0.783167	0.169462	0.473699	0.346494	0.228349	0.240512	0.461158	0.281769	0.189625	0.224096	0.417278	0.338636	0.248863	0.217225	0.293922	0.270268
797	758	7.739	TG(51:10)	TG	C54 H84 O6	TG(51:10)+(CH3CH2)3NH	D	0.663795	0.649078	1.06624	1.24614	0.634291	2.00265	1.26806	0.540475	1.59929	1.8464	1.76503	2.16161	1.90984	1.31365	1.8078	0.996443	0.690864	1.58012	0.990971	2.05408	1.41154	1.28912	1.67248	1.55423	2.49948	0.573068	0.435101	0.774643	0.851987	0.927047	0.607724	0.639745	0.899518	0.530332	0.642772	0.799245	0.436914	0.527183	0.638538	1.28302	0.558921	0.651434
798	759	5.737	TG(51:11)	TG	C54 H82 O6	TG(51:11)+(CH3CH2)3NH	D	0.517087	0.3453	0.465929	0.321242	0.288806	0.744115	2.12907	0.637566	0.703764	2.49094	3.35564	0.398681	0.531434	1.7209	1.03568	0.562132	0.676579	0.213648	0.230975	0.913176	0.433613	0.798432	0.509144	0.347259	0.340746	0.501294	0.554424	0.209106	0.372247	0.341344	0.282969	0.376537	0.772409	0.264412	0.378256	0.763241	1.0781	0.458657	0.497864	0.436116	0.779623	0.341751
799	760	8.545	TG(51:7)	TG	C54 H90 O6	TG(51:7)+(CH3CH2)3NH	D	0.580863	0.576794	0.770785	0.972596	0.54203	1.67281	0.677056	0.407391	1.58818	1.09244	3.19828	4.09473	2.72029	1.28729	3.66617	1.91748	1.87462	3.41005	3.04272	2.22732	3.17578	3.47116	4.08586	3.43833	6.17585	0.857857	0.586279	0.481376	1.8273	1.39932	0.22306	0.964114	0.993749	0.739508	0.85397	1.15915	1.27285	0.88221	1.54306	1.12925	0.965144	2.11644
800	761	7.798	TG(51:7p)	TG	C54 H90 O5	TG(51:7p)+(CH3CH2)3NH	D	0.20004	0.185626	0.140413	0.145869	0.147761	0.303072	0.606101	0.422076	0.413105	0.72718	1.01547	0.390166	0.406636	0.708414	0.541687	0.455483	0.464445	0.246231	0.328865	0.563642	0.288793	0.422118	0.552917	0.17308	0.330012	0.252882	0.250917	0.116413	0.131643	0.143797	0.0655012	0.12335	0.256905	0.176594	0.122356	0.113728	0.180777	0.129364	0.128647	0.15377	0.124626	0.0851493
801	762	7.11	TG(51:8)	TG	C54 H88 O6	TG(51:8)+(CH3CH2)3NH	C	0.348023	0.260295	0.311922	0.294298	0.147378	0.363805	0.600125	0.653436	0.445235	1.65308	1.43476	0.355057	0.438042	0.697435	0.532018	0.421635	0.584963	0.143663	0.214982	0.71809	0.147882	0.380536	0.458068	0.135189	0.199061	0.683278	0.612648	0.167433	0.304519	0.347126	0.155252	0.238453	0.589764	0.30658	0.234473	0.190256	0.426745	0.203917	0.19655	0.192758	0.124636	0.156393
802	763	6.791	TG(51:9)	TG	C54 H86 O6	TG(51:9)+(CH3CH2)3NH	D	0.297331	0.353814	0.295676	0.221841	0.236326	0.580652	0.766301	0.470308	0.490996	0.992201	1.52226	0.353564	0.425648	0.65425	0.593135	0.470715	0.524228	0.211449	0.322505	0.707664	0.311957	0.342077	0.414216	0.173938	0.237225	0.736981	0.569757	0.20976	0.28429	0.426488	0.187269	0.271908	0.610682	0.271751	0.267429	0.336246	0.405475	0.329881	0.244276	0.188614	0.247401	0.177377
803	764	8.03	TG(51:9)	TG	C54 H86 O6	TG(51:9)+(CH3CH2)3NH	D	0.464043	0.450244	0.690792	0.906016	0.534827	1.55892	1.05735	0.57613	1.18033	1.14881	2.68252	3.03385	2.05019	1.70455	2.72399	1.08562	1.18555	1.87646	1.70016	2.27993	1.56488	1.86492	1.93553	1.8153	2.91801	0.75258	0.622722	0.849838	0.992801	1.37441	0.635665	0.685391	0.877838	0.533863	0.677337	0.953907	0.827313	0.653775	0.910088	1.12731	0.712054	1.15573
804	765	7.255	TG(51:9p)	TG	C54 H86 O5	TG(51:9p)+(CH3CH2)3NH	D	0.168504	0.155985	0.13118	0.12754	0.126744	0.260692	0.618135	0.396149	0.398016	0.778243	1.03674	0.352786	0.338103	0.607741	0.546719	0.358671	0.365148	0.180816	0.242078	0.503691	0.205563	0.303426	0.352723	0.125909	0.219667	0.389874	0.289971	0.11157	0.183303	0.208327	0.109498	0.157794	0.367713	0.164854	0.156007	0.141971	0.271139	0.170459	0.160283	0.157706	0.105003	0.0940707
805	766	7.629	TG(52:8)	TG	C55 H90 O6	TG(52:8)+NH4	D	1.76704	2.7651	2.63953	2.21463	1.77565	0.829664	1.45043	1.1713	0.630713	1.57318	0.628183	0.689123	0.745836	0.723134	0.580743	0.456122	0.503175	0.328472	0.643523	0.431495	0.531304	0.620421	0.800317	0.553264	0.483568	0.183243	0.135702	0	0.0945503	0.0602991	0.0172845	0.00146272	0.0296498	0.0236616	0.0193062	0.0336838	0.0216381	0.000229587	0.0132376	0.0279298	0	0.0168658
806	767	7.252	TG(54:6)	TG	C57 H98 O6	TG(54:6)+H	D	0.491848	0.371727	0.156222	0.152454	0.380125	0.202997	0.244809	0.185422	0.216089	0.485463	0.641481	0.263209	0.625823	0.456404	0.438738	0.330793	0.324079	0.190427	0.216312	0.752439	0.184001	0.527007	0.38367	0.359259	0.23058	0.519563	0.911533	0.2083	0.432097	0.606367	0.39258	0.438197	0.558587	0.76531	0.425299	0.344998	0.381473	0.719035	0.353389	0.514606	0.331524	0.211527
807	768	8.143	TG(55:3)	TG	C58 H106 O6	TG(55:3)+Li	D	0.304677	0.349295	0.335224	0.372721	0.302064	0.439823	0.499373	0.645482	0.635273	0.664323	1.01178	0.865338	1.35917	1.11976	1.16324	1.80428	1.46979	1.25569	1.86292	1.54763	1.12663	1.70593	1.98734	1.21288	1.71817	0.332979	0.458797	0.50435	0.355298	0.293679	0.272283	0.28781	0.284217	0.582855	0.293775	0.250911	0.270263	0.355417	0.285101	0.252303	0.275727	0.157933
808	769	8.073	TG(55:8)	TG	C58 H96 O6	TG(55:8)+Li	C	0.283689	0.0512792	0.0483636	0.282151	0.355227	0.351514	0.60486	0.391752	0.434126	0.984324	1.05728	0.595265	0.706249	0.842756	0.720078	0.872921	0.865431	0.569715	0.68412	0.883342	0.117553	0.736963	0.804094	0.468029	0.188689	0.115359	0.754728	0.0800414	1.22422	0.623437	0.184863	0.181839	1.58262	0.188417	0.156002	0.189482	0.237036	0.233834	0.138099	0.198942	0.178377	0.133399
809	770	9.149	TG(56:6)	TG	C59 H102 O6	TG(56:6)+H	D	1.43075	1.70157	1.88879	2.08161	3.3025	1.60304	1.11365	1.53101	1.00198	3.06983	0.805742	0.816774	0.921032	1.99903	5.35864	0.943549	0.788986	0.868485	0.892227	1.5238	0.812985	0.948197	0.898113	1.22077	0.820363	1.30989	0.801186	1.0583	0.782827	0.870103	0.85047	1.13488	0.823408	0.538204	1.01152	0.949871	1.39457	1.57128	0.88418	1.59452	1.18551	1.43698
810	771	9.123	TG(57:6e)	TG	C60 H106 O5	TG(57:6e)+(CH3CH2)3NH	D	0.0627114	0.000550507	0	0	0.248897	0.448388	0.914149	0.381175	0.414488	0.706333	1.53513	0.565343	0.539524	0.79116	0.745026	0.198692	0.354339	0.282243	0.324876	0.256235	0.255069	0.520061	0.40392	0.11667	0.0760717	0	0	0	0	0	0	0.0467536	0.107339	0	0	0	0	0	0	0.0302483	0	0
811	772	8.883	TG(57:7e)	TG	C60 H104 O5	TG(57:7e)+(CH3CH2)3NH	D	0.308392	0.189051	0.126545	0.199796	0.0622115	0.641219	0.865622	0.457533	0.442136	0.868171	0.847101	0.435673	0.378691	0.5235	0.643609	0.2847	0.345632	0.126201	0.362859	0.510034	0.272711	0.312455	0.369213	0.161352	0.184926	0.359943	0.0766977	0.0923138	0.156733	0.367337	0.139772	0.140255	0.392296	0.0997181	0.102792	0.0725517	0.153252	0.0685465	0.211111	0.135512	0.0904128	0.101586
812	773	8.769	TG(57:8e)	TG	C60 H102 O5	TG(57:8e)+(CH3CH2)3NH	D	0.0814547	0.0486384	0.0424247	0.0524548	0.0898756	0.321722	1.14021	0.598546	0.32995	1.29974	2.63011	0.215387	0.138699	0.582938	0.727906	0.606383	0.664636	0.109558	0.0905095	0.77054	0.0983333	0.289186	0.0577272	0.107835	0.117273	0.0835876	0.486787	0.0954441	0.126117	0.27238	0.0938202	0.19635	0.496299	0.163738	0.241633	0.106553	0.319077	0.157835	0.0634436	0.36108	0.12294	0.0705712
813	774	8.519	TG(57:8p)	TG	C60 H100 O5	TG(57:8p)+(CH3CH2)3NH	D	0.22971	0.132438	0.193177	0.0618122	0.187853	0.553953	0.921037	0.601664	0.591211	1.11153	1.11826	0.528045	0.220007	0.727599	0.698409	0.206985	0.300627	0.141554	0.221278	0.563697	0.182475	0.197161	0.185471	0.110813	0.026289	0.696487	0.446627	0.0883389	0.0924587	0.383669	0.128539	0.184898	0.628442	0.155675	0.158464	0.0204193	0.20485	0.0683918	0.118138	0.139043	0.013527	0.130476
814	775	8.496	TG(57:9e)	TG	C60 H100 O5	TG(57:9e)+(CH3CH2)3NH	D	0.259645	0.233055	0.173975	0.201306	0.191717	0.572165	0.954177	0.616882	0.54573	1.10022	1.259	0.504147	0.223577	0.698663	0.706626	0.215182	0.342501	0.143856	0.211007	0.503625	0.171633	0.258751	0.335653	0.152284	0.17714	0.697809	0.421702	0.0907749	0.295464	0.337635	0.128734	0.195403	0.515821	0.155034	0.198026	0.144833	0.217863	0.118057	0.132754	0.131441	0.117119	0.13646
815	776	9.572	TG(59:1)	TG	C62 H118 O6	TG(59:1)+NH4	C	0.509727	0.579986	1.13979	0.625442	0.651711	0.901501	0.589869	0.276555	0.954755	0.901369	0.882333	0.899506	0.783161	0.770316	0.470601	0.71397	0.614935	0.750374	0.671354	0.83622	0.551192	0.224586	0.247681	0.821077	0.333055	0.952717	1.16683	1.01344	0.953424	1.39036	1.0614	1.44812	1.12798	2.23054	0.971067	0.730011	0.504474	1.04867	1.25284	0.65404	1.87489	0.752928
816	777	5.107	TG(6:0/10:0/18:1)	TG	C37 H68 O6	TG(6:0/10:0/18:1)+NH4	B	0.734464	0.566978	0.694733	0.63352	0.618008	0.761155	0.685008	0.929668	0.705769	0.783899	1.02849	0.904368	0.865032	0.826679	0.892758	1.03386	0.932687	0.881981	0.853509	0.961072	1.12898	1.35441	1.34459	1.20631	1.13004	1.62531	1.82436	0.955191	1.37657	1.27072	1.34909	1.08393	1.22301	1.56004	1.20137	1.27557	1.45189	1.32635	1.06795	1.06812	1.32211	1.04304
817	778	5.881	TG(6:0/12:0/12:0)	TG	C33 H62 O6	TG(6:0/12:0/12:0)+Na	A	1.9671	1.52472	1.62291	1.32887	1.65986	1.46427	1.22788	1.16185	1.32891	0.825908	1.2844	1.42185	1.27819	1.21443	1.30335	1.5586	1.56128	1.75177	1.49248	1.22558	2.10151	1.65981	1.3181	1.95511	1.6278	1.17182	1.14157	1.62498	0.781847	0.987661	1.26131	1.31165	1.12135	0.612868	1.15915	1.40942	1.41303	1.32969	0.0305339	1.47427	1.566	2.13405
818	779	5.885	TG(6:0/12:0/12:0)	TG	C33 H62 O6	TG(6:0/12:0/12:0)+NH4	A	1.31795	1.25058	1.18727	1.17385	1.13208	1.02196	0.985993	0.978021	1.00112	0.892735	0.946701	0.948549	0.923638	1.0047	0.955943	1.07834	1.0536	0.968132	1.02374	0.989648	1.14092	1.04983	1.059	1.04977	1.00031	1.12691	1.23736	1.2293	0.884263	0.950651	0.974029	0.915523	0.989698	0.704225	0.856784	0.95835	0.972233	0.937664	1.15244	0.911526	0.967386	1.15113
819	780	4.752	TG(6:0/13:0/15:2)	TG	C37 H66 O6	TG(6:0/13:0/15:2)+H	B	1.38634	0.798484	0.917587	0.754396	0.681059	0.174746	1.0862	0.759789	0.319348	0.731398	1.80741	1.07955	1.14315	0.985725	0.940003	0.976203	0.799763	0.531379	0.580627	0.665538	0.798118	0.742112	0.67403	2.06529	0.542097	1.61908	1.28616	0.889472	0.650037	0.94095	0.692234	0.823196	0.349742	1.11305	0.790764	1.33064	1.22564	0.925901	0.818973	0.869033	1.02219	0.781505
820	781	6.82	TG(6:0/13:0/18:2)	TG	C40 H72 O6	TG(6:0/13:0/18:2)+NH4	B	0.288395	0.379647	0.592094	0.321559	0.28617	0.239867	0.366387	0.341818	0.542221	0.714923	0.928117	0.340423	0.457698	0.432845	0.469273	0.608184	0.392748	0.317328	0.378392	0.341642	0.846259	0.499817	0.617136	0.756384	1.0009	1.09655	2.72115	1.8646	0.916977	0.956037	0.584024	0.546215	0.785499	1.2475	1.92419	1.22722	0.62112	0.864561	0.585029	0.994533	1.143	0.625043
821	782	5.121	TG(6:0/14:1/18:2)	TG	C41 H72 O6	TG(6:0/14:1/18:2)+K	B	0.671186	0.301321	0.690786	0.316054	0.156599	0.716324	0.474697	0.545391	0.416171	0.534526	1.96807	1.3171	2.12825	1.05408	1.23633	0.297308	0.276696	0.245972	0.236147	0.327396	0.23671	1.09061	0.52041	0.43498	0.521238	2.3888	2.24242	0.390785	1.00251	1.30197	0.47384	0.470266	0.741417	0.580058	0.499479	0.700681	0.716742	0.524666	0.49717	0.678734	0.658062	0.215198
822	783	6.604	TG(6:0/14:1/18:2)	TG	C41 H72 O6	TG(6:0/14:1/18:2)+Na	B	0.627353	0.590475	0.558498	0.567073	0.374231	0.61608	0.748368	0.755402	0.757654	0.820139	0.969009	0.919211	1.14253	1.22498	1.0155	1.29793	1.12764	0.960173	1.06172	1.06236	0.923032	1.10259	1.33055	0.798174	1.03322	0.833945	0.927002	0.727337	0.86714	0.784506	0.607225	0.605769	0.76204	0.903153	0.694758	0.683932	0.648322	0.765164	0.545799	0.413996	0.49967	0.316247
823	784	6.605	TG(6:0/14:1/20:5)	TG	C43 H70 O6	TG(6:0/14:1/20:5)+H	B	0.627343	0.5904	0.558708	0.566604	0.374566	0.616712	0.746739	0.75477	0.757529	0.818649	0.969153	0.918442	1.14339	1.21915	1.01398	1.29466	1.13046	0.956298	1.06204	1.06028	0.92444	1.10636	1.33054	0.796573	1.03378	0.834527	0.914992	0.726211	0.867435	0.784092	0.608061	0.606987	0.763727	0.90421	0.68893	0.689291	0.649322	0.765232	0.546053	0.414517	0.499098	0.317017
824	785	6.577	TG(6:0/14:1/23:5)	TG	C46 H76 O6	TG(6:0/14:1/23:5)+NH4	B	0.103724	0.0906009	0.270781	0.0499698	0.0466105	1.12127	1.33598	0.382209	1.3042	1.25476	1.28747	0.594063	0.463625	0.445937	0.888636	0.287899	0.401821	0.376494	0.232211	0.344993	0.173978	0.211797	0.849352	0.13018	0.779626	0.171548	0.0787346	0.035738	0.0368185	0.044817	0.0345211	0.0447884	0.0414005	0.0223382	0.0640829	0.0124482	0.0797398	0.0518235	0.0571097	0.0544672	0.0459622	0.0151627
825	786	4.949	TG(6:0/15:1/15:2)	TG	C39 H68 O6	TG(6:0/15:1/15:2)+H	B	1.32017	0.903476	1.01959	0.895336	1.55394	1.31276	1.0467	1.00528	1.06102	0.952307	1.36416	1.41874	1.32794	1.34943	1.37973	1.51231	1.541	1.56168	1.94409	1.26991	1.63145	1.6098	1.44287	2.34543	1.75738	1.60407	1.38572	1.07648	1.00342	1.06694	1.45138	1.42418	1.25633	1.08688	1.27902	2.56686	1.5659	1.42451	1.52502	2.29767	1.74272	2.40612
826	787	4.432	TG(6:0/15:2/15:2)	TG	C39 H66 O6	TG(6:0/15:2/15:2)+H	A	0.772653	0.665778	0.68605	0.566855	0.548707	1.08724	0.905864	0.783019	0.940018	1.00721	1.26696	1.03496	0.678837	1.09656	1.01132	1.00114	0.751791	0.63139	0.612897	1.00577	2.99094	1.15793	0.805674	1.08029	0.987093	1.6605	1.96768	1.10653	1.16317	1.08253	1.06318	1.22134	1.36465	1.09388	1.20545	1.12674	1.39816	0.796606	1.45066	1.02312	1.39383	1.12994
827	788	5.164	TG(6:0/16:0/16:2)	TG	C41 H74 O6	TG(6:0/16:0/16:2)+K	B	0.257792	0.0138738	1.33974	0.079995	0.062461	0.183549	0.396942	0.161885	0.163984	0.159891	0.912217	0.616363	1.01873	0.986113	0.519472	0.236702	0.177269	0.127077	0.143995	0.133069	0.110691	0.178617	0.318016	0.0788552	0.204286	5.12246	2.45824	0.235124	2.12349	2.69675	0.804041	0.648147	1.37534	0.722723	0.708517	0.890437	0.964881	0.841512	0.669087	0.570543	1.83213	0.875632
828	789	7.919	TG(6:0/17:0/18:1)	TG	C44 H82 O6	TG(6:0/17:0/18:1)+NH4	B	0.174656	0.328922	0.196086	0.196342	0.182137	0.612125	0.589886	0.565811	0.615962	0.712251	0.813856	0.649942	0.629455	0.65962	0.668614	0.644834	0.656171	0.515518	0.519658	0.54287	0.515093	0.632392	0.715207	0.43669	0.46117	0.680448	0.679505	0.657191	0.746129	0.650419	0.997364	0.964166	1.08882	1.9254	1.10149	1.11956	1.23243	1.64944	1.58642	1.26591	1.08521	0.844466
829	790	7.59	TG(6:0/17:1/18:1)	TG	C44 H80 O6	TG(6:0/17:1/18:1)+NH4	B	0.121132	0.217723	0.16004	0.173438	0.148695	0.326293	0.276231	0.270408	0.332774	0.491444	0.601178	0.319737	0.380037	0.489864	0.409639	0.510452	0.393033	0.301384	0.313671	0.491999	0.407249	0.387905	0.518812	0.273597	0.322645	0.784286	1.06976	0.72922	0.990908	0.744174	1.22269	1.064	1.21661	1.77939	1.11152	1.23463	1.66429	2.02142	1.32878	1.09685	1.15017	0.819757
830	791	7.189	TG(6:0/17:1/18:2)	TG	C44 H78 O6	TG(6:0/17:1/18:2)+NH4	B	0.133838	0.109061	0.112658	0.123236	0.108155	0.208374	0.218099	0.171028	0.193666	0.494778	0.311137	0.315764	0.288171	0.312505	0.363192	0.331324	0.28959	0.237638	0.248862	0.366666	0.3019	0.353611	0.411665	0.221385	0.278059	1.71498	1.70232	1.2694	1.8637	1.45676	1.11172	1.03493	1.79318	2.40862	1.27179	1.27733	1.48737	1.64625	1.12361	0.860279	0.894512	0.721591
831	792	5.124	TG(6:0/17:3/17:3)	TG	C43 H70 O6	TG(6:0/17:3/17:3)+K	B	1.12831	0.439817	0.963508	0.486276	0.262332	1.2507	0.617595	0.68533	0.576054	0.683251	2.12491	2.03267	2.4788	1.55949	1.70863	0.609381	0.601683	0.501498	0.492036	0.576424	0.549851	1.71172	0.632606	1.09611	1.27194	2.15608	1.72412	0.52729	0.898305	1.21878	0.788604	0.800101	0.822407	0.53376	0.611311	1.10536	1.00238	0.785127	0.862936	1.12526	1.18644	0.541405
832	793	6.827	TG(6:0/17:3/18:1)	TG	C44 H76 O6	TG(6:0/17:3/18:1)+NH4	B	0.107037	0.188804	0.095021	0.174902	0.131304	0.220975	0.347344	0.314935	0.339024	0.357054	0.369172	0.36946	0.328428	0.411476	0.424979	0.332544	0.361273	0.201087	0.288553	0.303315	0.280141	0.267552	0.261726	0.235054	0.316143	1.93139	2.16389	1.7548	2.11475	1.70336	0.963601	0.973777	1.65327	1.50695	1.0902	1.1153	1.35513	1.29812	0.862977	0.699572	0.746742	0.562396
833	794	8.086	TG(6:0/18:0/18:1)	TG	C45 H84 O6	TG(6:0/18:0/18:1)+NH4	A	0.652776	0.794653	0.645028	0.868378	0.637409	1.28933	1.07827	1.30127	1.31717	1.43447	1.39589	1.17969	1.24355	1.38614	1.26854	1.1054	1.05431	1.07495	1.1037	1.19336	1.0211	1.10819	1.39062	0.902414	1.05193	0.52211	0.530303	0.675701	0.559195	0.605669	0.407912	0.401969	0.485968	0.489494	0.440919	0.418498	0.452419	0.494502	0.513741	0.48153	0.445068	0.434619
834	795	7.719	TG(6:0/18:1/18:1)	TG	C45 H82 O6	TG(6:0/18:1/18:1)+Na	A	0.995034	1.14662	0.969312	0.857157	0.68337	2.02982	1.35308	1.80966	1.99974	1.75809	1.41457	1.49493	1.47353	1.38003	1.4978	1.57731	1.5903	1.58243	1.32645	1.29835	1.51705	1.33968	1.63775	1.27096	1.41627	0.820304	0.711193	0.627542	0.60179	0.604387	0.515537	0.42451	0.428008	0.465034	0.363257	0.40297	0.4528	0.365679	0.46011	0.604333	0.548667	0.484972
835	796	7.388	TG(6:0/18:1/18:2)	TG	C45 H80 O6	TG(6:0/18:1/18:2)+NH4	A	0.374389	0.390847	0.288936	0.279726	0.222489	1.30811	1.1889	1.42995	1.50937	1.75978	1.82246	1.34223	1.29356	1.77902	1.35876	1.22245	1.27668	1.06494	1.06134	1.42041	1.05023	1.34373	1.69837	0.80029	1.14691	0.132038	0.178914	0.23948	0.132823	0.121905	0.0465602	0.0532692	0.072414	0.0607913	0.0532443	0.0754478	0.0715796	0.0829046	0.0564748	0.0545954	0.0935199	0.0609916
836	797	7.031	TG(6:0/18:2/18:2)	TG	C45 H78 O6	TG(6:0/18:2/18:2)+NH4	A	0.398573	0.543287	0.409807	0.302161	0.279603	1.56796	1.2787	1.50042	1.60652	2.07471	1.74392	1.13596	1.21281	1.50795	1.44503	1.19777	1.06309	0.816633	0.875245	1.2656	0.813925	1.12223	1.35161	0.595305	0.804777	0.10759	0.130807	0.15147	0.0766765	0.081965	0.0294614	0.031275	0.0464083	0.0420567	0.0344271	0.0526029	0.0472089	0.0485095	0.0428289	0.0318902	0.0504032	0.0443782
837	798	4.89	TG(6:0/8:0/12:0)	TG	C29 H54 O6	TG(6:0/8:0/12:0)+NH4	A	2.65605	1.55287	0.976616	1.30893	1.0478	2.63295	1.62547	0.677744	1.70171	0.665583	2.16767	2.24658	2.25548	2.54909	1.89736	3.31587	3.06296	3.20505	2.41516	1.99	4.53754	2.88113	2.88123	3.43054	4.96199	3.25676	2.93353	2.01098	1.11126	3.15572	3.68711	2.97515	1.96511	1.70727	2.00524	3.1415	2.90514	2.53694	3.83189	3.42806	3.68366	3.469
838	799	5.087	TG(6:0/8:0/21:6)	TG	C38 H60 O6	TG(6:0/8:0/21:6)+(CH3CH2)3NH	B	0.222933	0.275871	0.31717	0.255298	0.181166	0.469666	0.422258	0.495403	0.503319	0.50277	0.474666	0.453024	0.441233	0.538712	0.515895	0.506143	0.397158	0.301256	0.425481	0.428499	0.42887	0.650239	0.824303	0.355627	0.504885	1.36604	1.38533	0.93907	1.40574	1.32193	1.17542	1.01266	1.57088	1.57574	1.40006	1.49674	1.55957	1.61451	0.968219	0.852925	1.32025	0.77036
839	800	8.743	TG(6:0/8:0/22:3)	TG	C39 H68 O6	TG(6:0/8:0/22:3)+NH4	B	0.233676	0.191286	0.206866	0.260747	0.409073	2.33596	0.292787	0.22755	0.234305	0.186974	2.23258	0.194075	0.236388	0.246461	1.81836	0.428128	2.48128	1.32718	0.205257	1.29756	2.57394	0.88995	0.696251	0.221159	0.352602	0.6504	2.49533	1.37703	0.289104	2.25142	2.06559	2.19376	1.25083	0.615853	0.98259	2.07446	2.44716	0.398992	1.3674	0.340309	0.977301	2.71293
840	801	3.799	TG(6:0/9:0/18:2)	TG	C36 H64 O6	TG(6:0/9:0/18:2)+Na	B	3.54722	0.603208	1.94999	0.53622	0.0774388	2.11685	2.35644	0.874812	1.05724	1.32713	1.39838	0.742589	0.687496	1.26142	1.2324	0.549547	0.438102	0.493567	0.278233	0.832154	0.454693	0.620452	0.299948	0.552989	0.400321	9.45026	6.62438	0.18376	0.499537	3.07632	0.286983	0.554066	0.76376	0.404355	0.436378	0.455308	0.310312	0.623711	0.46984	0.426008	0.352828	0.457585
841	802	10.499	TG(63:1)	TG	C66 H126 O6	TG(63:1)+NH4	D	0.404666	0.476598	0.463789	0.395408	0.446396	0.367991	0.441464	0.375775	0.379622	0.444137	0.36377	0.498569	0.414448	0.5121	0.456735	0.405042	0.40128	0.332604	0.553053	0.545008	0.337575	0.346573	0.34432	0.438016	0.583766	1.11152	1.31841	0.833903	1.10615	1.01906	1.0559	1.30578	1.2375	1.32124	1.41117	1.3364	0.913105	1.42698	1.24014	1.16606	1.4414	0.95859
842	803	10.742	TG(64:0)	TG	C67 H130 O6	TG(64:0)+NH4	D	0.454639	0.503877	0.444935	0.508523	0.515482	0.379165	0.527153	0.620686	0.449563	0.513247	0.628257	0.737531	0.555841	0.818232	0.618899	0.667782	0.680118	0.62283	0.93209	0.841992	0.648683	0.735489	0.758595	0.580391	0.769637	0.892785	1.19526	0.808381	0.863745	0.829921	0.952463	1.16493	1.1209	1.39391	1.09991	1.30019	0.901308	1.3275	1.11455	1.0904	1.45468	0.933853
843	804	3.834	TG(64:15)	TG	C67 H100 O6	TG(64:15)+Na	D	0.356986	0.541894	0.584661	0.605743	0.542551	0.187045	0.309511	0.526581	0.441293	0.397184	0.457091	0.229289	0.396239	0.428527	0.385612	0.613714	0.676289	0.505766	0.610929	0.401708	0.631011	1.30216	1.48973	0.854997	0.751262	0.591374	0.556829	0.409083	0.572949	0.634841	0.613546	0.701096	0.928922	1.09254	0.77611	1.1729	1.04818	1.21236	0.928909	1.01076	1.82302	1.40972
844	805	10.65	TG(65:1)	TG	C68 H130 O6	TG(65:1)+NH4	D	0.410003	0.501559	0.464392	0.433681	0.425029	0.376529	0.521389	0.529313	0.488167	0.539157	0.426478	0.571784	0.450946	0.602637	0.493694	0.381886	0.425087	0.415453	0.531448	0.576097	0.335406	0.403376	0.477382	0.437044	0.643621	1.1283	1.3455	0.903527	1.30344	1.1083	0.948427	1.17584	1.35233	1.33611	1.45099	1.47452	0.876005	1.53439	1.10147	1.10183	1.35274	0.830434
845	806	10.497	TG(65:2)	TG	C68 H128 O6	TG(65:2)+NH4	C	0.384078	0.472756	0.499093	0.444174	0.495707	0.373499	0.534054	0.416567	0.426907	0.464395	0.398473	0.514205	0.37972	0.518401	0.501204	0.399343	0.408291	0.353742	0.487382	0.556423	0.308547	0.312546	0.347949	0.363878	0.469233	1.31855	1.53476	0.938331	1.26742	1.20771	1.11627	1.33806	1.4245	1.42052	1.50364	1.53332	1.14796	1.74812	1.41837	1.13864	1.48223	1.04573
846	807	10.292	TG(65:3)	TG	C68 H126 O6	TG(65:3)+NH4	D	0.68016	0.77301	0.899713	0.854778	0.668777	0.614187	1.15115	0.604505	0.36535	0.776682	0.628602	0.632591	0.609522	0.575788	0.795583	0.605472	0.436918	0.418694	0.84881	0.785938	0.418218	0.34544	0.174986	0.527295	0.541489	0.205272	1.36838	0.885101	1.19517	1.00801	0.723474	0.15324	1.17786	0.633206	0.954275	1.09233	0.726955	0.786426	0.270937	0.645366	0.324782	0.177804
847	808	11.001	TG(67:0)	TG	C70 H136 O6	TG(67:0)+NH4	D	0.38314	0.509019	0.413065	0.487339	0.356074	0.303248	0.393729	0.529811	0.199611	0.273583	0.345039	0.495381	0.402586	0.56399	0.414088	0.390343	0.486144	0.310873	0.567748	0.579893	0.275271	0.425041	0.591445	0.422499	0.472114	0.768354	1.02721	0.604065	0.950325	0.719738	0.89335	1.01404	1.3382	1.73955	1.40683	1.54973	1.04147	1.48925	1.40499	1.49281	2.04136	1.29697
848	809	10.823	TG(67:1)	TG	C70 H134 O6	TG(67:1)+NH4	D	0.405568	0.512115	0.403862	0.448896	0.473034	0.423662	0.585	0.538556	0.453893	0.563767	0.499585	0.485773	0.435412	0.61054	0.530343	0.379881	0.435341	0.300359	0.589481	0.50153	0.430973	0.387949	0.499196	0.46731	0.61275	1.25729	1.50725	0.959566	1.24764	1.14623	1.07007	1.23807	1.36027	1.35946	1.2446	1.27037	0.91058	1.42596	1.10366	1.02948	1.29555	0.92716
849	810	10.652	TG(67:2)	TG	C70 H132 O6	TG(67:2)+NH4	D	0.44588	0.573552	0.470988	0.439575	0.444315	0.402415	0.571178	0.536831	0.488582	0.569723	0.528104	0.685256	0.451788	0.629534	0.516884	0.399601	0.461468	0.396482	0.488373	0.539661	0.33618	0.413571	0.464013	0.404815	0.581033	1.29731	1.4626	0.984754	1.38443	1.22879	0.99562	1.22027	1.50074	1.37638	1.48421	1.49644	0.922623	1.59745	1.14318	1.02172	1.33554	0.902211
850	811	10.504	TG(67:3)	TG	C70 H130 O6	TG(67:3)+NH4	D	0.691401	0.947218	0.698597	0.709055	0.629891	0.757675	1.10581	0.886929	0.746385	0.97681	0.806324	1.00866	0.328962	1.03072	0.842277	0.709731	0.740384	0.538209	0.674879	1.0793	0.65384	0.630932	0.521085	0.727659	0.82432	1.04171	1.66133	0.923299	1.05533	1.00887	0.787293	0.939588	0.898175	0.8386	0.994586	0.368106	0.208487	1.13547	0.889975	0.734616	0.808073	0.687672
851	812	10.901	TG(68:1)	TG	C71 H136 O6	TG(68:1)+NH4	D	0.486173	0.686103	0.547944	0.609265	0.560306	0.624461	0.77982	0.769283	0.715891	0.785699	0.751539	0.848717	0.647989	0.943663	0.738322	0.646703	0.622943	0.574781	0.805729	0.707807	0.614568	0.734025	0.827571	0.746224	0.794349	0.99777	1.25083	0.881303	0.991112	0.909888	0.768903	0.976902	1.20174	0.972638	1.01552	1.06884	0.717872	1.14424	0.944196	0.714084	0.966047	0.70236
852	813	10.737	TG(68:2)	TG	C71 H134 O6	TG(68:2)+NH4	D	0.557814	0.742708	0.61597	0.632916	0.607082	0.683732	0.882457	0.840455	0.828615	0.895653	0.873415	1.0989	0.736142	0.959308	0.848993	0.673386	0.701611	0.643995	0.859884	0.857582	0.716465	0.721284	0.823866	0.710606	0.82247	1.02789	1.27523	0.917651	1.01982	0.908217	0.784585	0.935359	1.04127	0.922527	0.887263	0.975992	0.647821	0.975298	0.784233	0.698607	0.850229	0.614246
853	814	11.003	TG(69:1)	TG	C72 H138 O6	TG(69:1)+NH4	D	0.397096	0.52263	0.488898	0.491549	0.372681	0.414451	0.674782	0.505772	0.467987	0.491701	0.505727	0.589588	0.396942	0.596804	0.489338	0.378338	0.451334	0.322786	0.54996	0.500598	0.45823	0.448972	0.691443	0.494847	0.524518	1.22362	1.26551	0.896153	1.36453	1.06375	0.931891	1.07819	1.47401	0.974706	1.26039	1.51969	0.83171	1.52235	1.04021	0.994394	1.26973	0.894213
854	815	10.817	TG(69:2)	TG	C72 H136 O6	TG(69:2)+NH4	D	0.421607	0.654603	0.554834	0.592334	0.555999	0.606913	0.834564	0.607206	0.56055	0.794777	0.634779	0.689237	0.527239	0.705031	0.544043	0.410341	0.507829	0.360119	0.638276	0.662806	0.464912	0.448794	0.543012	0.633743	0.661233	1.38109	1.80701	1.04553	1.44563	1.28235	1.00747	1.14921	1.53536	1.47566	1.27223	1.08628	0.813001	1.25886	0.946375	0.977186	1.26699	0.878242
855	816	11.076	TG(70:1)	TG	C73 H140 O6	TG(70:1)+NH4	D	0.53107	0.723829	0.625632	0.668723	0.643502	0.75716	1.08373	0.876625	0.742243	0.83098	0.840285	0.950475	0.646331	1.31023	0.769982	0.540795	0.657212	0.56369	0.863286	0.768181	0.604732	0.604015	0.884498	0.695788	0.959122	0.907639	1.25318	0.785969	0.944244	0.880102	0.695779	0.731946	1.14052	0.854244	0.824627	0.882548	0.631255	1.02523	0.801444	0.609716	0.648871	0.585293
856	817	5.154	TG(8:0/10:0/18:1)	TG	C39 H72 O6	TG(8:0/10:0/18:1)+NH4	B	1.31154	1.053	1.07596	1.04298	1.17322	1.32998	1.15763	1.14781	1.15639	0.971249	1.23661	1.3627	1.18642	1.30222	1.22705	1.24705	1.4078	1.3745	1.27404	1.21589	1.70045	1.48423	1.36779	1.57433	1.6727	1.18719	1.0734	1.16418	0.930373	1.02387	1.21196	1.16496	1.03443	0.948395	0.982401	1.20239	1.23982	1.13513	1.39151	1.26798	1.73755	1.36618
857	818	5.089	TG(8:0/10:0/18:2)	TG	C39 H70 O6	TG(8:0/10:0/18:2)+K	B	1.36583	1.08379	1.48809	1.02775	0.637949	0.721792	0.727911	0.77463	0.559778	0.888729	0.994908	0.890349	0.824157	0.648036	0.631457	0.361508	0.351718	0.253473	0.298886	0.411975	0.197427	0.338887	0.368121	0.209986	0.233359	1.66723	1.6165	0.605548	1.09571	0.899631	0.482816	0.408733	0.695375	0.76452	0.475096	0.411059	0.460407	0.419815	0.330551	0.391698	0.48683	0.266392
858	819	6.59	TG(8:0/10:0/18:2)	TG	C39 H70 O6	TG(8:0/10:0/18:2)+NH4	A	0.364098	0.430353	0.441967	0.399156	0.255486	0.481451	0.586874	0.633085	0.585066	0.772663	1.04289	0.826739	1.15535	1.17631	0.991441	1.12633	1.04757	0.748489	0.920662	1.01317	0.691029	0.879432	1.08129	0.536209	0.770341	0.779197	0.839918	0.538345	0.76639	0.638704	0.438699	0.484915	0.628603	0.681103	0.565936	0.509902	0.535636	0.601401	0.425904	0.331594	0.396055	0.239383
859	820	6.367	TG(8:0/12:0/12:0)	TG	C35 H66 O6	TG(8:0/12:0/12:0)+NH4	A	1.22719	1.12366	1.04658	1.07312	1.00782	0.870917	0.877761	0.848938	0.774534	0.798131	0.827504	0.875403	0.817741	0.848275	1.07789	0.980648	0.862427	1.0014	0.978521	0.859101	1.18584	1.07706	1.00865	1.04988	0.942123	1.22725	1.31312	1.34485	1.04502	1.06772	0.925445	0.960376	0.92038	0.881374	0.859937	1.0085	0.899519	1.0034	1.20412	0.844605	0.962566	1.02165
860	821	6.828	TG(8:0/12:0/14:0)	TG	C37 H70 O6	TG(8:0/12:0/14:0)+Na	A	1.44835	1.41998	1.37077	1.42116	1.39393	1.03316	0.963622	0.931338	0.899915	0.738147	0.853409	1.0425	0.976768	0.904488	0.922611	1.22611	1.15702	1.25287	1.32628	1.04515	1.44737	1.19057	1.12743	1.36917	1.10922	1.38664	1.44094	1.6764	1.36016	1.42083	1.32174	1.42047	1.15929	1.16171	1.11368	1.16539	1.21432	1.20519	1.4382	1.13664	1.41228	1.40975
861	822	7.295	TG(8:0/12:0/18:1)	TG	C41 H76 O6	TG(8:0/12:0/18:1)+Na	B	1.98228	2.04027	1.87958	2.29952	1.97757	1.33677	0.941162	1.03785	1.23227	0.901237	0.723989	1.49103	1.34489	1.0848	1.39337	1.37586	1.22952	2.06405	1.64891	1.16236	1.76404	18.3341	1.30165	1.9953	1.54573	1.47538	1.55483	2.02083	1.67984	1.71306	1.75811	1.89109	1.31361	1.33544	1.24129	1.56311	1.38611	1.50679	2.02589	1.81838	1.56884	2.05246
862	823	7.26	TG(8:0/12:0/18:3)	TG	C41 H72 O6	TG(8:0/12:0/18:3)+H	B	2.17542	2.22096	2.20122	2.45992	2.43015	1.44995	1.08998	1.31247	1.37504	0.845422	0.842465	1.41358	1.47256	1.1002	1.2735	1.62662	1.55171	2.07968	1.91527	1.23037	2.04119	1.88988	1.47799	2.18384	1.73433	1.56801	1.70479	2.23866	1.86016	1.92217	1.94193	1.99076	1.42854	1.3305	1.37357	1.62583	1.60469	1.68669	2.02885	1.95345	1.78773	2.22834
863	824	7.662	TG(8:0/12:0/20:3)	TG	C43 H76 O6	TG(8:0/12:0/20:3)+H	B	1.8116	1.70037	1.74961	2.16202	1.82174	1.19228	1.10294	1.15079	1.3437	0.932223	0.91636	1.32958	1.29742	1.09708	1.30947	1.21612	1.19287	1.56761	1.41207	1.03234	1.53937	1.32393	1.2051	1.74939	1.44074	1.28066	1.61355	1.77729	1.5431	1.68011	1.54269	1.63443	1.34918	1.33057	1.25082	1.26495	1.37869	1.50413	1.7105	1.74192	1.53188	1.72225
864	825	7.394	TG(8:0/12:0/20:4)	TG	C43 H74 O6	TG(8:0/12:0/20:4)+H	B	0.806998	0.863917	0.882344	0.246113	0.605558	0.864466	0.837501	1.05012	1.00041	0.848323	0.964936	1.20776	1.58638	1.28881	1.16903	1.86106	1.70853	0.241493	1.85346	1.37653	0.207766	1.85907	0.145571	1.45368	1.90784	0.777288	0.911265	1.08168	0.857865	0.741324	0.669716	0.6446	0.634149	0.989732	0.63951	0.626715	0.672608	0.70536	0.559614	0.497489	0.617404	0.37425
865	826	8.071	TG(8:0/18:1/18:1)	TG	C47 H86 O6	TG(8:0/18:1/18:1)+NH4	A	0.512695	0.752101	0.477857	0.791587	0.551446	0.512772	0.789256	0.511439	0.550006	0.629196	0.635793	0.535281	0.588486	0.736591	0.688794	0.703832	0.639002	0.531216	0.684405	0.687823	0.726891	0.654968	0.808425	0.615389	0.682655	0.850731	0.759423	0.67119	0.852206	0.940397	0.750036	0.697211	0.858076	0.930709	0.776658	0.985238	0.873412	1.00928	0.892988	0.7801	1.236	0.770435
866	827	7.739	TG(8:0/18:1/18:2)	TG	C47 H84 O6	TG(8:0/18:1/18:2)+NH4	A	0.718798	0.763514	0.562693	0.752603	0.657992	0.784219	0.753176	0.694013	0.809212	0.85112	0.863313	0.606764	0.739708	0.910532	0.907225	0.945056	0.860885	0.752989	0.783964	0.77686	0.857764	0.866702	1.05216	0.778081	0.881762	0.775993	0.985306	0.881732	0.868288	1.07503	0.633453	0.711185	0.869081	0.736286	0.625619	0.966822	0.986146	0.928345	0.839145	0.759281	1.23539	1.03954
867	828	5.378	TG(8:0/8:0/12:0)	TG	C31 H58 O6	TG(8:0/8:0/12:0)+NH4	A	1.85652	1.31491	1.49543	1.20745	1.36242	1.47816	1.41487	0.956202	0.902475	0.67112	1.12996	1.47978	1.23037	1.20695	1.46506	1.40059	1.22479	1.42462	1.50259	1.31653	1.73462	1.5891	1.51574	2.06636	2.04506	1.69344	1.44374	1.39241	0.872861	1.20598	1.42638	1.4693	1.37736	0.942924	1.10764	1.63975	1.36464	1.56911	1.74389	1.41768	1.81575	1.99334
868	829	4.91	TG(8:0/8:0/14:1)	TG	C33 H60 O6	TG(8:0/8:0/14:1)+NH4	B	2.07875	0.35055	0.730789	5.82015	1.40401	2.71836	1.07288	0.760702	1.1237	0.528557	4.83113	2.07644	3.2544	7.81245	2.07761	2.62269	2.11546	2.83195	2.90787	1.50844	4.06915	2.2367	1.238	3.97605	3.8344	2.01146	1.98801	1.46926	3.99826	1.87955	1.89342	2.84802	2.17407	1.12102	1.99912	2.53301	3.11806	2.52359	2.87809	3.49755	3.33154	3.65197
869	830	5.528	TG(8:0/8:0/18:1)	TG	C37 H68 O6	TG(8:0/8:0/18:1)+NH4	B	1.47769	0.611544	0.71743	0.90833	0.694818	0.972992	0.72966	0.734506	0.874583	0.549354	0.963691	1.27845	0.560863	1.42814	1.0195	1.01502	0.683236	1.16041	0.818437	0.959621	0.96476	1.16148	0.989354	1.21125	2.02753	1.85393	1.68307	0.876711	1.00289	1.22059	1.27292	1.13865	1.22741	1.2531	1.08742	1.39524	1.256	1.56585	1.0848	1.06168	1.19569	0.817935
870	831	6.254	TG(8:0/8:0/21:2)	TG	C40 H72 O6	TG(8:0/8:0/21:2)+NH4	B	1.0688	1.01135	0.995951	1.0042	0.78508	1.2685	0.889396	0.965301	0.891357	0.804514	0.81832	0.565542	1.72303	0.969391	1.28164	0.876918	1.09786	0.985645	0.706449	0.976295	0.660256	1.09534	1.22809	1.10389	1.24553	1.26637	1.04129	0.563583	1.01406	0.998818	0.632827	0.733418	0.983672	0.886047	1.04456	1.06891	0.84227	0.998144	0.912732	1.01661	0.644563	1.24935
871	832	5.492	TG(8:0/8:0/22:4)	TG	C41 H70 O6	TG(8:0/8:0/22:4)+K	B	0.918089	0.821487	0.941979	0.713294	0.632986	0.911288	0.911345	0.856501	0.893321	0.902656	1.03054	0.948771	1.03157	0.933927	0.834812	0.949428	0.832863	0.810869	0.869309	0.84878	0.687673	0.851265	1.13555	0.734523	0.73514	1.38032	1.17326	0.769208	0.913663	0.969844	0.821974	0.845802	1.03819	0.943657	0.853285	0.961341	0.952938	0.92548	0.75418	0.730759	0.929608	0.706833
872	833	3.623	TG(8:0/8:0/8:0)	TG	C27 H50 O6	TG(8:0/8:0/8:0)+NH4	A	1.11334	0.654011	1.49396	0.488851	0.745767	0.962641	1.06157	0.893586	0.599077	1.29575	0.755421	0.721117	0.775784	1.45076	0.820475	0.92971	0.897785	0.618586	0.364342	0.615901	0.708489	0.743779	0.659608	0.775963	0.862258	1.02241	1.09812	0.660438	0.763759	1.08741	0.609215	0.371501	0.735001	0.844067	0.672936	0.854751	0.615649	0.65313	0.664304	0.53999	0.781927	0.866684
873	834	6.972	TG(9:0/9:0/18:1)	TG	C39 H72 O6	TG(9:0/9:0/18:1)+Na	B	0.364037	0.477063	0.365603	0.395161	0.262581	0.530323	0.552052	0.654783	0.593203	0.501653	0.87807	0.842391	1.16222	1.09067	1.09175	1.47113	1.35296	1.23184	1.32807	1.17318	1.11186	1.32376	1.41625	0.792094	1.2026	0.969484	0.962235	0.886754	1.02817	0.934886	0.947981	0.931082	0.934458	1.37387	1.00089	0.829618	0.970876	1.14148	0.818565	0.717028	0.910232	0.407133
874	835	5.505	TG(9:0/9:0/18:2)	TG	C39 H70 O6	TG(9:0/9:0/18:2)+NH4	A	0.745805	1.18709	0.648895	0.695539	1.11772	1.06778	1.22922	1.15582	1.26089	1.09973	0.823979	0.98565	1.53591	0.966779	0.745954	0.983397	1.18324	0.896703	0.804258	1.09604	0.824261	1.34402	1.43303	1.35747	0.887701	1.37444	0.988031	1.1552	0.639064	1.18682	1.30443	1.34533	1.25001	0.889179	1.19261	1.17501	0.999596	1.38063	1.38745	1.11714	0.7583	1.60145
875	836	4.493	TG(9:0/9:0/18:3)	TG	C39 H68 O6	TG(9:0/9:0/18:3)+NH4	A	0.901586	0.769034	0.192498	0.895201	0.813136	0.915651	0.846538	0.888532	0.830967	0.772949	0.951743	0.851339	0.817519	1.56445	0.96681	1.58537	1.43283	1.05927	0.910552	1.00737	2.21229	1.10986	1.06804	0.922361	0.970119	1.38882	1.43186	1.50803	1.32462	1.22981	1.62971	1.58019	1.17105	1.25649	1.09552	1.10713	1.06755	1.64552	1.4571	0.934981	1.71377	1.02505
876	837	6.142	TG(9:0/9:0/21:1)	TG	C42 H78 O6	TG(9:0/9:0/21:1)+NH4	B	1.36847	1.34454	0.951456	0.868176	1.03146	0.965253	1.07194	1.14998	1.20806	1.195	1.26102	0.978355	1.17178	1.1147	0.980942	1.14189	1.40207	1.10644	1.15477	1.14061	1.23061	1.19558	1.19261	1.16064	1.06673	1.43467	1.07566	1.01054	1.25576	1.04054	1.13142	1.08653	1.07829	1.27708	1.10774	1.15012	1.23441	1.1368	1.09235	1.03087	1.07517	1.20399
[truncated: 8 more columns]
