# Supplementary material for: Integrated metabolomics and lipidomics analyses suggest the temperature-dependent lipid desaturation promotes aflatoxin biosynthesis in Aspergillus flavus
Source: Front Microbiol. 2023 Mar 31;14:1137643. doi: 10.3389/fmicb.2023.1137643 (PMC10102665; doi:10.3389/fmicb.2023.1137643)
Supplement: Supplementary file 4 [file Table_4.XLSX]

## Sheet: Supplementary Table S4
Supplementary Table S4 The total peak information for lipidome in mycelia samples detected by LC-MS (ESI-).
RT, retention time of metabolite peak, and m/z from HPLC/ESI-qIT-OT-MS. Identification level (A; B; C; D)- (A) Class and all fatty acid chains are completely identified; (B) Both class specific ion and fatty-acid-derived product ions are detected; (C) Either class specific ion or fatty-acid-derived product ions are detected; (D) Unable to identify the lipid structure, such as a dehydrated ion.
1	Level	Aspect	Information	Fill in
2	General aspect	Type of metabolome analysis	targeted metabolite analysis	FALSE
3			non-targeted metabolite class scale profiling	TRUE
4			non-targeted metabolome scale profiling	TRUE
5			non-targeted finger printing of mass features	FALSE
6		Type of quantification	absolute or quantification	NO
7		Type of reference samples	chemcially defined	NO
8			biologically defined	YES
9		Type of replication	analytical (same analytical sample preparation)	NO
10			technological (same biological preparation)	NO
11			biological (same experimental condition)	5
12			full experiment	50
13		Type of technology	reference publication	Journal of Agricultural and Food Chemistry
14		Sample preparation	method of sample preparation	NO
15			method of chromatography/separation	HPLC
16			method of ionization	ESI
17			method of detection	MS
18	metabolite/mass feature	Metabolite	metabolite name	see below
20			metabolite structure and public source of metabolite identifier	see below
21		Identification	identification process	see below
22			by authentic mass isotopomer added to one or all biological sample(s)	FALSE
23			by authentic reference compound within a co-processed reference mixture	TRUE
24			reference library	YES
25			type of mass spectrum	Orbitrap Fusion
26		Quantification	type of quantification	Relative peak area
27		Validity testing	Recovery testing (chemical analog)	NO
28			Recovery testing (internally added mass isotopomer)	NO
29			Recovery testing (mixture of most divergent samples from the experiment)	NO
30			Test for linear range	NO
31			Limit of quantification (LOQ)	NO
32			Limit of detection (LOD)	NO
33
34	Experiment title: The total peak information for lipidome in mycelia samples detected by LC-MS (ESI-).
35	Organism/Plant species: Aspergillus flavus
36	Organ/tissue: mycelia
37	Analytical tool: HPLC/ESI-qIT-OT-MS (Orbitrap Fusion)
38	Peak No.	RT (min)	Corresponding metabolite name in literature	Metabolite class	Molecular formula	Adduct	Identification level (A-D)	28-2D-1	28-2D-2	28-2D-3	28-2D-4	28-2D-5	28-3D-1	28-3D-2	28-3D-3	28-3D-4	28-3D-5	28-4D-1	28-4D-2	28-4D-3	28-4D-4	28-4D-5	28-5D-1	28-5D-2	28-5D-3	28-5D-4	28-5D-5	28-6D-1	28-6D-2	28-6D-3	28-6D-4	28-6D-5	37-2D-1	37-2D-2	37-2D-3	37-2D-4	37-2D-5	37-3D-1	37-3D-2	37-3D-3	37-3D-4	37-3D-5	37-4D-1	37-4D-2	37-4D-3	37-4D-4	37-4D-5	37-5D-1	37-5D-2
39	1	6.006	Cer(d17:1/20:1+O)	Cer	C37 H71 O4 N1	Cer(d17:1/20:1+O)-H	B	0.866151	0.759291	0.42184	0.658309	0.305286	0.7894	0.930835	0.925365	0.843739	1.06819	0.905097	0.691975	0.715587	0.786581	0.696452	0.565035	0.526156	0.36281	0.513618	0.55031	0.508156	0.743953	0.883656	0.339834	0.4836	0.626103	0.623021	0.459626	0.516978	0.482038	0.498105	0.516514	0.653055	0.491099	0.633693	0.597078	0.666442	0.837283	0.473814	0.416255	0.499813	0.342809
40	2	6.526	Cer(d18:0/18:0)	Cer	C36 H73 O3 N1	Cer(d18:0/18:0)-H	A	0.931717	1.22821	1.24974	0.992964	0.823524	0.646011	0.743177	0.839267	0.676827	0.810412	0.566642	0.522619	0.541163	0.508417	0.489102	0.437524	0.342087	0.315978	0.376163	0.354899	0.386745	0.527322	0.579629	0.313652	0.310662	0.974074	1.10429	0.654462	0.981755	0.794548	0.440407	0.418069	0.629578	0.900472	0.462705	0.337794	0.506002	0.439902	0.361145	0.26808	0.366048	0.267532
41	3	6.338	Cer(d18:1/18:0)	Cer	C36 H71 O3 N1	Cer(d18:1/18:0)-H	A	0.731109	1.12759	0.956875	0.88243	0.634339	0.746909	0.709675	0.829408	0.803133	0.930206	0.681518	0.552716	0.517963	0.621735	0.482071	0.574446	0.489382	0.386548	0.445552	0.486139	0.520459	0.737789	0.885415	0.401296	0.391085	0.822556	0.970716	0.494996	0.822896	0.64532	0.34793	0.381809	0.555698	0.964065	0.433399	0.369973	0.527754	0.547203	0.37722	0.314977	0.406028	0.34077
42	4	6.12	Cer(d18:1/18:0+O)	Cer	C36 H71 O4 N1	Cer(d18:1/18:0+O)-H	B	0.83914	1.23274	1.29316	1.0732	0.810722	0.84079	0.806909	0.858479	0.893043	0.934758	0.644907	0.539503	0.604346	0.557818	0.535499	0.5152	0.424407	0.367935	0.448429	0.453186	0.393077	0.485924	0.648902	0.287456	0.341394	0.861323	0.995	0.589809	0.873133	0.734854	0.499717	0.455375	0.608138	0.841252	0.483573	0.44653	0.594846	0.570402	0.34111	0.273557	0.453533	0.383068
43	5	6.093	Cer(d18:2/18:0)	Cer	C36 H69 O3 N1	Cer(d18:2/18:0)-H	A	1.43579	1.40949	1.24832	1.39961	0.89884	0.99962	0.805133	0.925339	0.773459	1.1333	0.82598	0.543923	0.921365	0.864825	0.846143	0.956098	0.666077	0.572915	0.665462	0.697622	0.820506	1.06051	1.5242	0.622951	0.712445	0.519339	0.567293	0.296321	0.433791	0.386393	0.111064	0.0682197	0.194972	0.201916	0.104762	0.211809	0.366939	0.269867	0.0964579	0.0944091	0.187321	0.148406
44	6	5.855	Cer(d18:2/18:0+O)	Cer	C36 H69 O4 N1	Cer(d18:2/18:0+O)-H	B	1.60732	0.707663	0.630757	0.685421	0.601887	1.38517	1.20641	0.943855	1.07389	0.934277	1.10915	0.916707	0.853904	1.0769	0.864723	0.797969	0.740787	0.656877	0.576984	0.595039	0.920264	1.05297	1.0592	0.723558	0.705135	1.3969	1.35507	0.644546	0.837146	0.727746	0.515506	0.539427	0.622611	0.452783	0.45591	0.554333	0.74457	0.709497	0.422206	0.3082	0.574763	0.406574
45	7	6.322	Cer(d20:2/18:0+O)	Cer	C38 H73 O4 N1	Cer(d20:2/18:0+O)-H	B	0.61584	0.616244	0.664012	0.592768	0.935397	0.705376	0.678447	0.836531	0.699368	0.8304	0.461669	0.58883	0.445448	0.572832	0.620982	0.419613	0.324155	0.419651	0.493462	0.351476	0.437214	0.604951	0.452489	0.3684	0.30965	1.31911	1.40861	0.93571	1.71818	1.26466	0.526592	0.606693	0.931056	0.948637	0.835702	0.394341	1.19393	0.670742	0.396365	0.523021	0.38062	0.304068
46	8	6.324	Cer(d36:0+O)	Cer	C36 H73 O4 N1	Cer(d36:0+O)-H	C	0.763826	0.944293	0.888601	0.816822	0.620681	0.439961	0.448482	0.500622	0.44386	0.576339	0.336753	0.293899	0.302578	0.316576	0.268697	0.296899	0.220577	0.176475	0.229544	0.218258	0.213194	0.250912	0.335064	0.166556	0.186402	2.04557	2.09847	1.15819	1.84024	1.54517	0.675186	0.582592	0.914721	1.50413	0.717269	0.349555	0.536793	0.506502	0.293081	0.235868	0.321553	0.259383
47	9	4.937	Cer(d36:1+2O)	Cer	C36 H71 O5 N1	Cer(d36:1+2O)-H	D	1.17656	0.938487	1.3335	0.843533	0.799696	0.953704	0.708167	0.812578	0.715425	0.763452	0.756597	0.60579	0.817393	0.751261	0.632293	0.672567	0.536284	0.474865	0.567933	0.500546	0.372485	0.723729	0.897124	0.378578	0.414408	0.868247	0.894972	0.413264	0.582041	0.59255	0.452759	0.487632	0.577921	0.60667	0.439292	0.505439	0.748598	0.707856	0.400349	0.33464	0.417099	0.319072
48	10	2.18	cPA(18:2)	cPA	C21 H37 O6 N0 P1	cPA(18:2)-H	B	1.68573	0.227479	1.41264	0.507311	0.0785328	0.555231	1.42096	0.847448	0.503783	0.230748	1.4462	1.08261	1.4518	1.62536	1.54639	1.11937	0.795928	0.93947	0.782493	0.866943	2.5365	1.59208	1.79421	2.1502	2.01786	1.65427	1.22721	0.101792	0.284372	0.900705	0.471561	0.50935	1.26602	0.62708	0.489993	2.78992	2.90022	2.52956	1.29914	0.675869	4.23293	3.03663
49	11	5.196	DGDG(16:0/18:2)	DGDG	C49 H88 O15	DGDG(16:0/18:2)+HCOO	A	2.21447	1.43028	1.697	1.17893	1.34886	1.92695	1.41345	1.42918	1.37764	1.00337	2.04418	1.94883	2.05292	1.31981	1.50122	1.85886	2.01903	1.91573	1.40194	1.50218	3.17989	1.97767	1.29055	2.61922	1.84521	1.49009	1.43026	1.11369	1.01273	1.04202	1.78113	1.82368	1.46496	0.733584	1.08436	0.0023374	1.87688	1.66451	1.71394	1.68956	0.0124597	2.57602
50	12	4.864	DGDG(16:0/18:3)	DGDG	C49 H86 O15	DGDG(16:0/18:3)+HCOO	A	1.54787	1.10156	1.28237	1.04033	0.975782	1.90229	1.20355	1.17483	1.07186	0.976844	1.68178	1.69489	1.59768	1.614	1.51656	2.1229	1.92693	2.21412	1.63542	1.26729	3.37867	2.37348	2.01965	2.31518	2.27485	1.99795	1.62331	1.29253	0.864239	1.10574	2.01176	2.18704	1.56566	1.13489	1.42087	0	2.12177	2.02105	1.77517	2.02422	0	2.78257
51	13	4.838	DGDG(18:2/18:2)	DGDG	C51 H88 O15	DGDG(18:2/18:2)+HCOO	A	3.82838	0.5048	0.923771	0.212302	1.30669	3.32804	0.790936	0.405781	1.3625	0	4.15293	4.45698	4.25492	4.17493	4.04011	5.23162	4.79683	6.32342	4.17097	3.53851	9.64673	6.67073	5.00901	7.2394	6.87394	5.07886	4.61043	0.858966	0.724643	0.999867	5.17544	5.68671	3.92196	0.90182	3.74083	0	5.84557	4.88802	5.3625	5.52144	0	7.697
52	14	4.52	DGDG(18:2/18:3)	DGDG	C51 H86 O15	DGDG(18:2/18:3)+HCOO	A	1.33478	0.994001	1.1059	0.802262	0.812459	1.65117	1.37162	1.33641	1.11247	1.04119	1.72488	1.63083	1.62272	1.50288	1.48582	2.07721	1.94408	1.95064	1.62619	1.41422	2.29619	1.99082	1.92451	1.848	1.68667	2.07303	1.93638	2.04358	1.82429	1.63302	2.18655	2.16933	1.90701	1.74502	1.73991	0	2.06031	1.98253	1.87353	1.60705	0	2.01543
53	15	4.232	DGDG(18:3/18:3)	DGDG	C51 H84 O15	DGDG(18:3/18:3)+HCOO	A	1.22013	1.01339	1.0545	0.829069	0.729247	1.25831	1.14227	1.12952	1.01683	0.96737	1.23826	1.19925	1.197	1.13797	1.01807	1.32949	1.24013	1.16988	1.03959	0.972853	1.35691	1.23983	1.28747	1.0848	1.02983	1.34274	1.35818	1.11432	1.02667	0.983772	1.35915	1.22805	1.09446	1.05262	0.978739	0.00018723	1.30159	1.23345	1.12182	1.03346	0.00182645	1.29225
54	16	7.081	DGDG(48:4)	DGDG	C63 H112 O15	DGDG(48:4)-H	D	0.868955	0.255161	0.94378	0.204664	0.114124	0.522786	0.346387	0.346081	0.206333	0.520534	1.60425	0.578588	0.421732	0.445937	0.54332	0.0977041	0.134827	0.0308467	0.0398207	0.104588	0.0914693	0.157397	0.0936636	0.103152	0.0623169	2.50798	1.54467	0.0768922	0.413686	0.657681	0.0998831	0.0706936	0.209766	0.140572	0.0561237	0.12418	0.0898645	0.0426407	0.153065	0.062541	0.0544222	0.0237203
55	17	4.897	dMePE(12:0/18:2)	dMePE	C37 H70 O8 N1 P1	dMePE(12:0/18:2)-H	B	0.706807	1.47538	1.06661	1.22077	0.879994	0.480977	0.879078	0.939103	0.741787	0.860899	0.586025	0.517288	0.46377	0.381825	0.338951	0.333534	0.307701	0.274197	0.324869	0.363239	0.112285	0.221567	0.306366	0.111075	0.111374	0.513191	0.817211	1.0188	1.14638	0.779677	0.645398	0.812863	0.934969	1.92839	0.856902	0.37739	0.563495	0.645399	0.55837	0.513845	0.283715	0.265866
56	18	5.223	dMePE(16:0/18:2)	dMePE	C41 H78 O8 N1 P1	dMePE(16:0/18:2)-H	B	0.187816	0.326286	2.91309	4.17071	3.19632	0.514311	0.897061	0.151052	0.679528	0.929238	0.333525	0.274503	0.0489431	0.19155	0.0492605	1.63499	0.0453503	0.0430383	0.0449888	0.0638812	0.797297	0.0250867	0.0386334	0.0194113	0.0563616	0.134101	0.198153	0.187957	1.44959	0.16283	0.167344	0.170643	0.169656	0.710431	0.376197	0.0679246	0.108505	0.112998	0.0912584	0.102507	0.0513657	0.062949
57	19	5.015	dMePE(16:0/18:3)	dMePE	C41 H76 O8 N1 P1	dMePE(16:0/18:3)-H	B	1.52018	0.784234	1.2444	0.745624	2.21156	1.30052	0.714639	1.16184	0.576138	0.401811	1.64003	0.769657	0.960084	0.591306	0.335269	1.26389	0.485592	0.483756	0.50977	0.313854	0.513482	1.07057	1.02513	0.189115	0.141379	1.65601	1.78842	0.843853	0.82593	0.422818	1.49585	1.33863	0.79913	0.831437	0.508273	1.22294	1.40905	0.723684	0.54796	0.307107	0.790275	0.491245
58	20	4.936	dMePE(16:1/16:2)	dMePE	C39 H72 O8 N1 P1	dMePE(16:1/16:2)-H	B	0.499518	1.1273	0.825649	0.832317	0.628381	0.406008	0.752215	0.759078	0.651169	0.783481	0.728222	0.473133	0.535066	0.570938	0.421605	0.476542	0.442288	0.365225	0.520968	0.546422	0.271955	0.54967	1.08786	0.300507	0.315366	0.527553	0.643308	0.868205	1.14825	0.687889	0.773823	0.796631	1.13957	1.55201	0.8591	0.520416	0.724716	0.749522	0.587497	0.550839	0.28224	0.357719
59	21	6.119	dMePE(18:0/18:1)	dMePE	C43 H84 O8 N1 P1	dMePE(18:0/18:1)-H	B	0.209643	0.323503	0.323537	1.75699	1.46212	0.29116	0.456536	1.65049	0.336332	0.339256	0.389623	0.303603	0.322491	0.189401	0.223369	0.47861	0.385694	0.32636	0.416744	0.441621	0.113302	0.20648	0.24846	0.0544836	0.0699161	0.642153	0.938247	0.871606	1.06882	1.82762	1.06144	1.09369	1.07292	2.41511	1.05854	0.354496	0.517405	0.652666	0.540141	0.595803	0.320496	0.237618
60	22	6.665	dMePE(18:0/18:1)	dMePE	C43 H84 O8 N1 P1	dMePE(18:0/18:1)-H	B	0.274227	0.468098	0.382779	0.381083	0.289751	0.32041	0.552353	0.613674	0.450781	0.596669	0.544739	0.510571	0.569618	0.444075	0.419378	0.597573	0.484856	0.454499	0.548872	0.491395	0.170351	0.331246	0.488604	0.140961	0.185675	0.765278	1.09332	0.83321	1.05378	0.783759	1.13966	1.29195	1.33948	3.27998	1.20691	0.590594	0.804718	1.06318	0.93457	0.907246	0.576521	0.497891
61	23	5.291	dMePE(18:1/12:0)	dMePE	C37 H72 O8 N1 P1	dMePE(18:1/12:0)-H	B	0.505913	0.920389	0.721343	0.718102	0.560592	0.403514	0.635275	0.635004	0.577694	0.695876	0.532358	0.433244	0.500089	0.378575	0.340372	0.392369	0.383335	0.29984	0.384525	0.420763	0.181	0.320636	0.443364	0.175842	0.196602	0.911525	1.27535	1.2633	1.74453	1.13525	0.997865	1.03156	1.22411	2.25063	1.18136	0.58054	0.814917	0.827992	0.699617	0.678554	0.402955	0.387625
62	24	5.72	dMePE(18:1/18:1)	dMePE	C43 H82 O8 N1 P1	dMePE(18:1/18:1)-H	B	0.612037	1.34857	0.655021	1.15277	0.829408	0.342948	0.616134	0.632235	0.986616	0.677405	0.334909	0.27952	0.334198	0.258363	0.237361	0.398979	0.333393	0.344877	0.400354	0.39207	0.12687	0.263929	0.397859	0.102369	0.0947314	0.570747	0.815626	0.9336	1.29482	0.86427	0.785015	0.894974	0.939013	2.7743	0.882414	0.343191	0.49056	0.563437	0.443815	0.409213	0.218661	0.234285
63	25	6.21	dMePE(18:1/18:1)	dMePE	C43 H82 O8 N1 P1	dMePE(18:1/18:1)-H	B	0.311741	0.606951	0.489949	0.464558	0.375493	0.415382	0.674812	0.697234	0.613845	0.717118	0.553134	0.461571	0.567665	0.540078	0.461227	0.724097	0.625939	0.574145	0.664633	0.616541	0.253894	0.546665	0.846556	0.237118	0.295208	0.788165	1.04073	1.06898	1.40364	0.989665	1.03146	1.13802	1.33024	2.23863	1.16299	0.813999	1.02489	1.23232	0.604799	0.216066	0.489848	0.495565
64	26	5.242	dMePE(18:1/18:2)	dMePE	C43 H80 O8 N1 P1	dMePE(18:1/18:2)-H	B	0.432958	0.855123	0.664297	0.696068	0.595978	0.564278	0.878881	1.09668	0.925682	1.10566	0.73567	0.623942	0.609381	0.472854	0.487595	0.726717	0.630587	0.568978	0.680053	0.773558	0.21864	0.429159	0.750394	0.213551	0.240584	0.582881	1.0374	1.21465	1.52923	0.978528	0.721277	0.718804	0.881748	1.25323	0.67511	0.539559	0.7067	0.58654	0.515971	0.366215	0.255894	0.349434
65	27	5.832	dMePE(18:1/18:2)	dMePE	C43 H80 O8 N1 P1	dMePE(18:1/18:2)-H	B	0.678432	1.13862	0.931004	0.954657	0.796823	0.660894	0.934534	1.032	0.914064	1.0257	0.840393	0.673944	0.724738	0.630126	0.521958	0.686452	0.615008	0.525751	0.611712	0.689095	0.206805	0.380839	0.497215	0.185012	0.229699	0.797645	0.97081	1.08126	1.37522	1.00991	0.770545	0.841844	1.03627	1.1766	0.829181	0.590089	0.736338	0.771447	0.533744	0.440809	0.351232	0.312746
66	28	4.867	dMePE(18:2/18:2)	dMePE	C43 H78 O8 N1 P1	dMePE(18:2/18:2)-H	B	0.824829	1.58874	1.01307	1.50585	1.10095	0.660031	1.0399	1.49136	1.06497	1.18299	0.650035	0.621844	0.44188	0.568546	0.373157	0.357381	0.382002	0.314207	0.37909	0.519845	0.130481	0.205126	0.36378	0.099994	0.123499	0.533596	0.550655	0.918273	1.27757	0.708728	0.438689	0.432726	0.708714	0.719997	0.432568	0.244675	0.36923	0.34451	0.270877	0.21553	0.122086	0.158058
67	29	5.457	dMePE(18:2/18:2)	dMePE	C43 H78 O8 N1 P1	dMePE(18:2/18:2)-H	B	0.815856	1.44956	1.15522	1.22609	0.994227	0.763446	1.24734	1.2343	1.01099	1.14041	0.954954	0.85559	0.751401	0.671456	0.588158	0.520344	0.546669	0.431716	0.546203	0.682568	0.167486	0.296876	0.3613	0.145965	0.171632	0.518964	0.69199	0.832604	1.01529	0.732818	0.66937	0.717508	0.862279	1.21934	0.744029	0.398111	0.549481	0.574755	0.458078	0.364084	0.242247	0.250295
68	30	4.548	dMePE(18:3/18:2)	dMePE	C43 H76 O8 N1 P1	dMePE(18:3/18:2)-H	B	1.17187	2.8192	1.88554	2.55292	2.4379	0.390682	0.676677	1.03253	0.660044	0.820482	0.389901	0.355996	0.291144	0.264084	0.21402	0.227878	0.204423	0.22906	0.274545	0.359855	0.0759648	0.103322	0.21621	0.0680156	0.0548961	0.0207528	0.0367873	0.139544	0.08797	0.0561125	0.0176347	0.0373083	0.0351952	0.0646445	0.0525355	0	0.0276074	0.0370357	0.013118	0.00971795	0	0.0124733
69	31	6.439	dMePE(19:1/16:0)	dMePE	C42 H82 O8 N1 P1	dMePE(19:1/16:0)-H	B	0.506156	0.673264	0.660883	0.630749	0.488737	0.379039	0.519936	0.457382	0.305235	0.505139	0.423451	0.363718	0.349045	0.281447	0.275402	0.334277	0.343086	0.226714	0.294088	0.323575	0.108328	0.252194	0.267137	0.101683	0.0919393	1.60567	2.29708	1.97025	2.24404	1.37883	1.22571	1.47103	1.34385	4.24707	1.41821	0.407882	0.60711	0.865423	0.813283	0.929823	0.472835	0.440812
70	32	5.788	dMePE(20:1/18:2)	dMePE	C45 H84 O8 N1 P1	dMePE(20:1/18:2)-H	B	1.67676	2.3491	1.56566	1.97373	1.84484	0.217921	0.618967	0.5887	0.482886	0.662601	0.272968	0.123982	0.0566115	0.154925	0.154303	0.0496674	0.0518052	0.0541095	0.0229933	0.122057	0.0177678	0.0179058	0	0.0278508	0.0202098	0.613399	1.24006	0.910681	1.34778	0.796705	0.443152	0.209645	0.546648	0.826354	0.653978	0.0711649	0.0950556	0.116283	0.0531255	0.019946	0.0711427	0.0141667
71	33	5.045	dMePE(20:3/18:2)	dMePE	C45 H80 O8 N1 P1	dMePE(20:3/18:2)-H	B	0.881856	1.89079	0.517084	1.508	1.47475	0.0929364	0.195112	0.950289	0.0943175	0.0981794	0.213657	0.0024884	0.119341	0.189291	0.0787508	0.224752	0.0451371	0.0476211	0.0749411	0.12291	0	0.0640759	0.0932255	0.0420783	0.0412917	0.710387	1.24197	0.0484588	1.24812	0.805163	0.189303	0.208996	0.111355	0.327945	0.221479	0	0.0524204	0.232263	0.0419097	0.0258294	0.0381874	0.0283863
72	34	5.769	dMePE(32:1)	dMePE	C39 H76 O8 N1 P1	dMePE(32:1)-H	C	0.596543	1.01634	0.916328	0.818632	0.610644	0.680843	0.950017	0.980884	0.822149	0.94726	0.806163	0.681	0.783187	0.626476	0.550637	0.718401	0.65447	0.62206	0.638153	0.606184	0.401312	0.651153	0.827007	0.411563	0.396476	0.92442	1.16869	1.17858	1.36011	0.971809	0.78693	0.836122	1.07451	1.33672	0.839381	0.616277	0.787195	0.724614	0.624088	0.51084	0.443263	0.442155
73	35	5.358	dMePE(33:2)	dMePE	C40 H76 O8 N1 P1	dMePE(33:2)-H	C	1.92409	2.97974	1.89272	2.88277	2.26583	0.366437	0.66285	0.552187	0.446661	0.652316	0.250118	0.244739	0.200533	0.159644	0.139374	0.0874158	0.104217	0.0705342	0.0934914	0.126493	0.0468929	0.0847665	0.0710616	0.0503806	0.0403843	0.425263	0.686224	0.731851	1.05392	0.623979	0.285845	0.252133	0.296975	0.453629	0.278684	0.106042	0.130369	0.151051	0.114514	0.0746365	0.0629978	0.0740543
74	36	5.623	dMePE(33:2)	dMePE	C40 H76 O8 N1 P1	dMePE(33:2)-H	C	0.922985	1.76626	1.60354	1.3826	1.16817	0.571317	0.881146	0.889267	0.634937	0.756446	0.44305	0.422875	0.358274	0.331437	0.295625	0.247547	0.249789	0.189236	0.218407	0.262471	0.121275	0.189359	0.25881	0.0998859	0.11175	1.57044	1.34549	1.56437	1.88257	1.57104	0.723635	0.844922	0.723947	1.68788	0.802682	0.279551	0.403287	0.463088	0.480911	0.566772	0.702258	0.271404
75	37	5.026	dMePE(33:3)	dMePE	C40 H74 O8 N1 P1	dMePE(33:3)-H	C	2.12351	2.15932	1.31402	1.423	1.67439	0.181125	0.118692	0.0771081	0.0884027	0.220138	8.37222	0.0695127	0.120721	25.1289	0.0785252	5.6568	0.0385563	3.67585	0.0442393	0.0398829	0.0424947	6.91123	0.0416	3.79463	0.0139911	55.639	48.2654	37.1614	67.8238	57.6993	22.963	25.5453	40.8458	42.872	29.0077	15.9078	20.2708	26.4573	21.7752	19.0028	13.5057	13.1529
76	38	5.417	dMePE(34:3)	dMePE	C41 H76 O8 N1 P1	dMePE(34:3)-H	C	0.510194	0.840581	0.605101	0.706823	0.567313	0.650029	0.992905	1.00079	0.916927	1.01771	0.953471	0.755266	0.790905	0.680382	0.616586	0.786017	0.73887	0.672572	0.775271	0.846096	0.334058	0.653831	0.940061	0.334059	0.359265	0.728587	0.858377	1.05061	1.2681	0.920036	0.855129	0.899565	1.15043	1.35452	0.892362	0.701894	0.879374	0.875241	0.721979	0.552795	0.432477	0.44952
77	39	5.028	dMePE(34:4)	dMePE	C41 H74 O8 N1 P1	dMePE(34:4)-H	C	0.789491	1.03356	0.930232	0.862359	0.682106	0.767057	0.902698	0.983838	0.835965	0.967957	0.938143	0.760002	0.825369	0.798545	0.75628	0.662925	0.685956	0.469675	0.693787	0.635161	0.215538	0.592756	1.04829	0.203443	0.241812	0.938513	1.20866	0.906168	0.986639	0.898014	0.778726	0.90255	1.02183	1.26018	0.783199	0.64483	0.944635	0.908973	0.653418	0.484648	0.408562	0.322561
78	40	4.683	dMePE(34:5)	dMePE	C41 H72 O8 N1 P1	dMePE(34:5)-H	C	1.35223	2.62883	1.97496	2.0293	1.85542	0.469236	0.92395	0.962198	0.603182	0.835653	0.474445	0.519885	0.475119	0.355111	0.318453	0.281356	0.293088	0.292774	0.335568	0.3933	0.116464	0.196043	0.274886	0.0987906	0.101547	0.0520218	0.0668479	0.0766559	0.093492	0.0638874	0.0659554	0.069355	0.0890347	0.118883	0.0721759	0.0332973	0.0721922	0.0829666	0.0564368	0.0445847	0.0190423	0.0413149
79	41	5.768	dMePE(35:2)	dMePE	C42 H80 O8 N1 P1	dMePE(35:2)-H	C	1.19257	1.89816	0.955831	1.52919	1.24033	0.653948	0.669627	1.42961	0.733136	0.656161	0.326164	0.222602	0.474749	0.299502	0.339315	0.493718	0.415282	0.266577	0.295379	0.332916	0.1235	0.235554	0.448643	0.1494	0.169098	0.714627	0.784854	1.38096	1.37158	0.965204	1.16469	0.859761	1.23332	1.26672	0.764634	0.429348	0.405343	0.600312	0.500242	0.406361	0.257058	0.284009
80	42	5.01	dMePE(35:4)	dMePE	C42 H76 O8 N1 P1	dMePE(35:4)-H	C	1.49842	1.85355	1.23961	1.67839	1.38983	0.434792	0.597481	0.728968	0.509845	0.704416	0.318419	0.256221	0.24733	0.269871	0.227678	0.139777	0.195027	0.105506	0.152806	0.153994	0.0554894	0.116459	0.230474	0.046891	0.0586711	0.73022	1.03931	0.752415	0.89014	0.671684	0.330937	0.510348	0.432921	0.597819	0.350672	0.121975	0.193679	0.162469	0.118804	0.099459	0.0821684	0.0636721
81	43	5.296	dMePE(35:4)	dMePE	C42 H76 O8 N1 P1	dMePE(35:4)-H	C	1.18305	2.24799	1.91707	1.68113	1.36666	0.779654	1.36352	1.26984	1.08297	1.31297	0.735717	0.544877	0.552359	0.487757	0.422861	0.32836	0.231415	0.279603	0.371348	0.378848	0.104266	0.207896	0.290415	0.118644	0.0985693	0.195882	0.209973	0.278426	0.295108	0.213195	0.145426	0.175039	0.200324	0.283991	0.19096	0.0196888	0.132158	0.142887	0.0977149	0.102292	0.0142442	0.0655611
82	44	4.673	dMePE(35:5)	dMePE	C42 H74 O8 N1 P1	dMePE(35:5)-H	C	2.14812	3.76458	1.79535	3.03901	2.76752	0.146578	0.29978	0.304107	0.170376	0.243862	0.0788197	0.106714	0.0780415	0.0739533	0.0480012	0.0484795	0.0346352	0.0299298	0.0408831	0.0517109	0.0148802	0.024916	0.0423858	0.0105549	0.017014	0.0126775	0.0155356	0.012499	0.0276543	0.0220465	0.00369491	0	0.00832126	0.00504214	0.00249961	0	0	0	0	0.00149405	0	0
83	45	6.731	dMePE(38:2)	dMePE	C45 H86 O8 N1 P1	dMePE(38:2)-H	C	0.559859	0.943772	0.789786	0.762854	0.596726	0.415361	0.632459	0.692337	0.52406	0.720834	0.563647	0.570124	0.520444	0.408297	0.383485	0.520411	0.488182	0.346269	0.468122	0.483477	0.207369	0.340384	0.396648	0.164205	0.167891	0.723925	0.981943	0.741493	1.02954	0.828384	0.97822	0.958624	1.01461	1.92458	0.957129	0.511571	0.669006	0.749555	0.634798	0.55838	0.409805	0.38238
84	46	7.131	dMePE(40:2)	dMePE	C47 H90 O8 N1 P1	dMePE(40:2)-H	C	0.630699	1.0685	1.02351	0.997913	0.758151	0.556027	0.873561	0.918535	0.656427	0.949376	0.634777	0.591852	0.501865	0.466334	0.433786	0.480479	0.416937	0.330634	0.400247	0.490787	0.216892	0.348342	0.443114	0.175408	0.181378	0.737346	1.18956	0.791794	1.143	0.854957	0.727243	0.713048	0.82855	1.33702	0.70014	0.393765	0.51077	0.501693	0.400601	0.315828	0.309198	0.241735
85	47	7.508	dMePE(42:2)	dMePE	C49 H94 O8 N1 P1	dMePE(42:2)-H	C	0.668307	1.41279	1.26112	1.20613	0.889952	0.729253	1.04239	1.01998	0.736916	0.99122	0.630103	0.626357	0.472379	0.471974	0.454971	0.450852	0.375438	0.250962	0.357414	0.391593	0.241019	0.316353	0.38503	0.159402	0.188716	0.662011	0.99579	0.73351	1.03299	0.771016	0.444538	0.476775	0.639504	0.819854	0.508149	0.248735	0.401615	0.325605	0.309982	0.189417	0.290823	0.203924
86	48	2.652	FA(18:2)	FA	O2 H32 C18	FA(18:2)-H	C	0.961501	0.368994	1.65098	0.38925	0.140506	1.35613	0.864664	1.28752	1.25544	1.34094	1.36958	0.886411	1.05945	1.17127	1.36529	0.247589	0.353701	0.164898	0.20223	0.25369	0.110594	0.542425	0.564065	0.186943	0.171081	1.73595	1.04521	0.128833	0.78816	1.3309	0.143547	0.149713	0.118848	0.160598	0.143357	0.117177	0.104414	0.0978525	0.105587	0.189222	0.442179	0.0402883
87	49	3.424	FA(18:2)	FA	O2 H32 C18	FA(18:2)-H	C	0.795337	0.506483	0.839326	0.483986	0.291626	1.55357	1.07121	0.973192	1.11798	1.23122	1.04514	0.882299	0.829539	0.860939	1.1083	0.531363	0.456046	0.415338	0.39838	0.449483	0.442924	0.825806	0.525823	0.558412	0.431821	1.2528	1.25981	0.257223	0.595858	0.831049	0.312176	0.329288	0.381432	0.275401	0.314121	0.180995	0.316085	0.378741	0.24077	0.29955	0.260331	0.206498
88	50	2.351	LdMePE(16:0)	LdMePE	C23 H48 O7 N1 P1	LdMePE(16:0)-H	B	2.37567	2.30234	2.72549	2.01728	4.61884	2.3782	0.645019	2.58836	0.820197	3.01512	1.41929	0.389731	0.451409	0.36513	0.2012	0.262244	0.352042	0.4726	0.567953	0.180972	0.0980641	0.177675	0.363154	0.240907	0.0755988	1.77844	7.4646	1.42962	1.13591	1.17932	0.41372	1.15102	0.248004	2.05186	0.923289	0.529465	0.294456	0.230348	0.139306	0.190568	0.414548	0.179598
89	51	3.132	LdMePE(18:0)	LdMePE	C25 H52 O7 N1 P1	LdMePE(18:0)-H	B	1.93994	1.44627	2.09197	1.32513	0.791603	1.02728	1.21583	0.931564	1.14044	1.2302	0.937414	1.11724	1.08407	1.00414	0.853463	1.28564	1.01505	0.560562	0.63618	0.593118	0.168742	0.329322	0.408595	0.0983534	0.197671	1.79507	3.49672	0.422259	1.07083	1.39826	0.692225	0.706337	0.556476	1.04944	0.509509	0.266694	0.450534	0.489091	0.403747	0.514883	0.286904	0.316487
90	52	2.633	LdMePE(18:1)	LdMePE	C25 H50 O7 N1 P1	LdMePE(18:1)-H	B	0.753361	0.941848	0.918501	0.796811	0.377102	0.522106	0.992359	1.09816	1.07501	1.0211	0.806873	0.68094	0.849385	0.729545	0.60589	0.945282	0.543264	0.634191	0.913172	0.922303	0.342186	1.2352	1.12753	0.419899	0.445959	1.01829	1.26888	0.578295	0.958231	1.06393	0.353039	0.585914	0.685201	1.1143	0.564475	0.674284	0.713591	0.824094	0.573347	0.572106	0.378462	0.37349
91	53	2.096	LdMePE(18:2)	LdMePE	C25 H48 O7 N1 P1	LdMePE(18:2)-H	B	1.18802	1.61192	1.3496	1.32597	1.04422	0.38564	1.18926	1.40893	0.985656	0.948144	0.974934	0.574867	0.63817	0.484088	0.48567	0.294583	0.370026	0.349337	0.348712	0.527686	0.111441	0.341561	0.558622	0.127143	0.129609	0.559002	0.817624	0.642382	0.809388	0.837384	0.35071	0.313648	0.388045	0.909763	0.30984	0.343112	0.354323	0.392018	0.251258	0.220635	0.205013	0.147255
92	54	3.045	LPA(18:0)	LPA	C21 H43 O7 N0 P1	LPA(18:0)-H	B	2.7659	0.693804	2.18574	0.714966	0.344165	1.1224	0.712322	0.678898	0.732216	0.551353	1.428	1.09943	1.3021	1.37047	1.11106	0.718262	0.508735	0.331024	0.587457	0.58224	0.351482	0.60224	0.585436	0.394083	0.301988	3.07541	3.19467	0.16317	0.591366	0.927978	0.406212	0.253876	0.333769	0.966752	0.388086	0.521284	0.603923	0.46886	0.435765	0.54989	0.668114	0.557558
93	55	2.13	LPC(15:0)	LPC	C23 H48 O7 N1 P1	LPC(15:0)+HCOO	A	2.57263	2.93497	3.0927	2.21108	1.55302	0.790989	1.10646	1.23774	0.957439	1.07949	0.429935	0.331272	0.26525	0.240337	0.264721	0.178764	0.0969812	0.0177035	0.0537503	0.0806648	0.0406592	0.145479	0.242916	0.0577065	0.0420236	3.16261	4.26658	1.24621	1.87635	2.47549	0.587566	0.615965	0.401591	1.14579	0.37522	0.12278	0.223609	0.343439	0.291424	0.382739	0.0739757	0.199224
94	56	2.505	LPC(16:0)	LPC	C24 H50 O7 N1 P1	LPC(16:0)+HCOO	A	1.02638	1.26344	0.909593	1.13147	1.75289	1.05631	1.52755	0.539605	1.30613	0.533575	0.71681	0.332611	0.201162	0.626208	0.219674	0.193214	0.120133	0.146574	0.132592	0.113088	0.187723	0.152928	0.175756	0.0686181	0.185983	0.976573	2.3794	0.715641	0.597562	0.56363	0.646076	0.390633	0.616948	0.992319	0.35601	0.294096	0.170403	0.244682	0.143102	0.184426	0.251076	0.138446
95	57	1.892	LPC(16:1)	LPC	C24 H48 O7 N1 P1	LPC(16:1)+HCOO	A	0.79811	0.870543	1.22191	0.902384	0.600564	0.333741	1.02997	1.64369	0.787643	1.1237	0.863723	0.651128	0.660269	0.412151	0.394946	0.691409	0.499994	0.517948	0.475531	0.567753	0.168002	0.496942	1.13621	0.186265	0.256976	0.890382	1.46513	1.0214	1.07761	1.45677	1.29214	1.06795	0.954745	2.59473	0.898674	0.485916	0.55096	0.81663	0.482405	0.546295	0.360605	0.302619
96	58	2.854	LPC(17:0)	LPC	C25 H52 O7 N1 P1	LPC(17:0)+HCOO	A	1.59117	1.65163	1.80521	1.43896	1.00776	0.848951	1.08434	0.746583	0.486871	0.672123	0.585812	0.644049	0.538914	0.518915	0.454504	0.491844	0.399039	0.42318	0.473458	0.378012	0.382483	0.410596	0.496594	0.390965	0.374554	3.39772	4.87735	0.983881	1.94127	2.36174	0.697899	0.807758	0.694126	1.06484	0.618334	0.4948	0.558469	0.674072	0.652633	0.721913	0.361927	0.58027
97	59	2.261	LPC(17:1)	LPC	C25 H50 O7 N1 P1	LPC(17:1)+HCOO	A	1.62978	1.94556	1.93782	1.55896	1.16682	0.511619	0.952025	1.05148	0.716237	1.21099	0.510554	0.386134	0.371834	0.331383	0.266924	0.306425	0.217292	0.192003	0.186788	0.274227	0.0684316	0.239733	0.502836	0.0754721	0.122598	1.84989	2.4791	1.39779	1.99872	1.93294	0.606086	0.903509	0.85369	1.82645	0.598798	0.783787	0.758644	0.686234	0.49405	0.610427	0.460207	0.47614
98	60	3.13	LPC(18:0)	LPC	C26 H54 O7 N1 P1	LPC(18:0)+HCOO	A	1.55746	1.24111	1.73256	1.02027	0.657703	0.932883	1.18274	0.956665	1.05696	1.195	1.0057	0.961772	1.10099	0.96424	0.946477	1.271	0.899327	0.639527	0.630103	0.613857	0.207863	0.436082	0.572277	0.124042	0.238935	1.99977	3.47392	0.437472	0.974182	1.37328	0.737658	0.724708	0.567091	1.02908	0.498776	0.327018	0.508594	0.524907	0.440599	0.530756	0.300449	0.337186
99	61	2.636	LPC(18:1)	LPC	C26 H52 O7 N1 P1	LPC(18:1)+HCOO	A	0.637058	0.83195	0.773968	0.734926	0.460186	0.517551	1.00061	1.00792	1.03064	1.00832	0.514982	0.667062	0.761371	0.439851	0.634758	0.84483	0.849202	0.852551	0.977608	0.976247	0.385017	0.848631	1.48166	0.447005	0.471211	1.08744	1.32922	0.582854	0.979399	1.06275	0.636102	0.589453	0.681096	1.10051	0.565812	0.721169	1.1526	0.84059	0.558007	0.596821	0.390853	0.404189
100	62	2.101	LPC(18:2)	LPC	C26 H50 O7 N1 P1	LPC(18:2)+Cl	B	1.15651	1.83733	1.27015	1.21283	1.03194	0.487083	0.991378	1.37246	0.706607	1.11721	0.789257	0.700075	0.62982	0.467282	0.502862	0.408735	0.388825	0.345508	0.364999	0.564937	0.122818	0.382444	0.60643	0.112475	0.141728	0.681611	0.924222	0.594882	0.73693	0.735741	0.3028	0.289101	0.358527	1.11801	0.280624	0.504125	0.332703	0.417681	0.251738	0.199108	0.261392	0.151397
101	63	3.398	LPC(19:0)	LPC	C27 H56 O7 N1 P1	LPC(19:0)+HCOO	A	1.23412	0.755271	1.30229	0.640642	0.381526	0.580613	0.533607	0.478133	0.477588	0.557841	0.413305	0.36216	0.595844	0.300503	0.316771	0.341768	0.278707	0.159183	0.117507	0.157234	0.092189	0.103406	0.227814	0.0736295	0.0822603	4.57999	8.61205	0.806792	1.78273	2.69057	0.65202	0.811333	0.473594	1.29961	0.527995	0.287104	0.457005	0.528122	0.483124	0.718161	0.419131	0.578294
102	64	3.611	LPC(20:0)	LPC	C28 H58 O7 N1 P1	LPC(20:0)+HCOO	A	0.853592	0.68779	0.863666	0.526619	0.328589	0.907141	1.25145	0.991303	1.06775	1.26709	1.09487	0.853101	1.08331	0.905683	1.0346	1.20263	0.849023	0.626245	0.706643	0.524881	0.297312	0.582988	0.778297	0.198009	0.317839	1.93695	3.75239	0.277341	0.966723	1.12953	0.595885	0.59595	0.50328	0.909248	0.420062	0.328789	0.502249	0.62752	0.507112	0.555574	0.421344	0.501908
103	65	3.179	LPC(20:1)	LPC	C28 H56 O7 N1 P1	LPC(20:1)+HCOO	A	2.50308	2.37588	2.68403	2.10741	1.39236	0.787803	1.12221	0.973469	0.985535	1.07963	0.539988	0.4764	0.544056	0.423783	0.400673	0.566606	0.481673	0.362352	0.416981	0.445872	0.15393	0.369169	0.615333	0.12295	0.181489	1.26379	1.66687	0.418488	0.830858	0.96028	0.379113	0.343392	0.453663	0.491362	0.316712	0.311193	0.398372	0.472695	0.300446	0.317969	0.226186	0.252629
104	66	2.765	LPC(20:2)	LPC	C28 H54 O7 N1 P1	LPC(20:2)+HCOO	A	2.39447	2.53365	2.8415	2.2944	1.36057	0.886105	1.57026	1.37804	1.37232	1.50309	0.756635	0.720862	0.656619	0.560326	0.506456	0.485074	0.471694	0.374706	0.380071	0.501444	0.118733	0.3218	0.496788	0.122589	0.116216	1.03406	1.2383	0.555484	1.0136	0.945656	0.405234	0.415252	0.451827	0.656349	0.371669	0.318928	0.313119	0.442138	0.252053	0.257326	0.182411	0.160684
105	67	2.378	LPC(20:3)	LPC	C28 H52 O7 N1 P1	LPC(20:3)+HCOO	A	3.93433	4.38435	4.59798	4.3648	5.2478	0.618488	1.17494	0.659965	0.881993	0.797532	0.407292	0.341152	0.355566	0.0706942	0.184686	0.0240327	0.0424319	0.0166851	0.219413	0.184207	0.191272	0.239803	0.24921	0.177454	0.208917	0.0207233	0	0.0388579	0	0.0120931	0.143012	0.0735463	0.169895	0.239562	0.076123	0.11862	0.577605	0.17587	0.152674	0.0964605	0.0724131	0.117393
106	68	4.559	LPC(24:0)	LPC	C32 H66 O7 N1 P1	LPC(24:0)+HCOO	A	1.7455	0.93056	1.6307	0.590568	0.44384	1.72704	1.42716	0.971648	1.24773	1.23721	0.892652	0.863078	0.767589	0.760627	0.828819	0.69994	0.516625	0.334214	0.33291	0.383278	0.330813	0.547103	0.723566	0.238243	0.320589	3.1156	5.5557	0.483163	1.54267	1.73988	0.398806	0.414192	0.478986	0.650939	0.396456	0.259278	0.396736	0.304328	0.27864	0.221555	0.237891	0.224261
107	69	2.185	LPE(15:0)	LPE	C20 H42 O7 N1 P1	LPE(15:0)-H	B	2.06709	1.63014	3.47398	1.159	0.91754	1.30129	1.15858	1.47822	0.980303	1.15928	0.535435	0.428699	0.353357	0.264326	0.39386	0.165465	0.144283	0.0592845	0.0570538	0.01996	0.0816015	0.445777	0.571063	0.126258	0.206855	2.50168	4.79297	0.600653	1.36255	1.73747	0.350475	0.381819	0.305308	0.740896	0.247814	0.135101	0.115422	0.234387	0.128356	0.263816	0.117923	0.164632
108	70	2.587	LPE(16:0)	LPE	C21 H44 O7 N1 P1	LPE(16:0)-H	A	1.47363	1.10411	1.87378	0.95736	0.533231	1.06296	1.01631	0.90844	1.13682	1.0902	0.725622	0.665624	0.796429	0.744742	0.716101	0.526992	0.437546	0.318752	0.383416	0.371165	0.252808	0.485479	0.646465	0.292218	0.336063	1.42345	2.35271	0.265568	0.813238	1.00712	0.260399	0.249969	0.300277	0.751248	0.251165	0.287532	0.20155	0.187488	0.172814	0.226452	0.235581	0.132029
109	71	2.918	LPE(17:0)	LPE	C22 H46 O7 N1 P1	LPE(17:0)-H	B	2.76944	1.38269	3.23856	1.28012	0.699041	1.36452	1.1227	0.764028	0.877905	0.391986	0.442006	0.39252	0.303579	0.432639	0.413673	0.287895	0.161292	0.14159	0.109967	0.137386	0.0989748	0.28811	0.305615	0.120673	0.143454	4.1718	5.89913	0.469193	1.62703	2.54004	0.426948	0.429789	0.417567	0.651998	0.334751	0.189938	0.291175	0.241702	0.250324	0.369026	0.18189	0.2056
110	72	2.343	LPE(17:1)	LPE	C22 H44 O7 N1 P1	LPE(17:1)-H	A	1.11974	1.32355	1.31209	0.796747	0.634609	0.423833	0.697968	0.665831	0.575166	0.712502	0.393573	0.401748	0.44063	0.394563	0.239568	0.265639	0.334548	0.114151	0.177068	0.251929	0.0923202	0.392526	0.754135	0.14585	0.198812	1.07429	1.60096	0.513614	0.738568	0.741356	0.454713	0.364781	0.620504	0.935822	0.275107	0.507619	0.366633	0.33648	0.251557	0.38226	0.386646	0.231047
111	73	3.205	LPE(18:0)	LPE	C23 H48 O7 N1 P1	LPE(18:0)-H	B	2.46547	0.998199	2.43565	0.968727	0.486604	1.48547	1.07941	0.886635	1.12595	1.11643	0.941336	0.920074	1.0628	1.05521	0.96454	1.08454	0.756922	0.490052	0.515387	0.466323	0.30619	0.688223	0.711728	0.246581	0.386222	1.52977	2.43327	0.172446	0.554437	0.847686	0.341848	0.340817	0.298715	0.444145	0.217211	0.199557	0.326424	0.304447	0.257564	0.332991	0.220042	0.230732
112	74	2.418	LPE(18:1)	LPE	C23 H46 O7 N1 P1	LPE(18:1)-H	A	0.245337	0.289425	0.118409	0.192416	0.159776	0.467118	0.69499	0.659548	0.693654	0.68912	0.15971	0.111359	1.04053	0.0925955	0.0532992	0.897501	0.721095	0.0519105	0.760625	0.76038	0.0741145	0.172484	0.156048	0.0881633	0.703265	0.193486	0.226611	0.0604482	0.154305	0.117188	0.455637	0.0632583	0.0903493	0.69114	0.0548087	0.0739579	0.170051	0.0988715	0.0820467	0.056093	0.0450268	0.0524036
113	75	1.324	LPE(18:2)	LPE	C23 H44 O7 N1 P1	LPE(18:2)-H	B	2.43692	1.34679	0.999456	0.973178	0.962597	0.5913	0.610981	0.286573	0.3299	0.902084	1.13189	0.88901	1.7192	0.228485	0.226662	0.502612	0.264283	0.133415	0.188705	0.960853	0.21384	0.564766	0.258727	0.0893111	0.0973882	1.0226	0.530854	0.214049	0.326787	1.14101	0.429206	0.352214	0.140253	0.00182744	0.113111	0.00169009	0.526988	0.223107	0.363461	0.143899	0.000403124	0.207371
114	76	2.052	LPE(18:2)	LPE	C23 H44 O7 N1 P1	LPE(18:2)-H	A	1.29505	1.02651	1.1901	0.829312	0.686631	0.298672	0.517671	0.602761	0.402249	0.58143	0.645444	0.477243	0.639845	0.394228	0.429608	0.264371	0.25831	0.23404	0.229616	0.354579	0.11263	0.396453	0.416615	0.132187	0.143187	0.521382	0.726413	0.299522	0.507453	0.545941	0.209791	0.178505	0.301449	0.568034	0.191645	0.339733	0.264957	0.301095	0.219739	0.189847	0.206547	0.108352
115	77	3.245	LPE(20:1)	LPE	C25 H50 O7 N1 P1	LPE(20:1)-H	B	1.27561	0.924072	1.51704	0.804984	0.48137	1.12353	1.07784	0.961889	1.02515	0.956815	0.761942	0.690291	0.924282	0.884895	0.657748	1.02212	0.76898	0.69953	0.595233	0.573283	0.447803	0.835545	1.20005	0.352721	0.514658	1.35527	1.93988	0.335067	0.864872	1.07515	0.524618	0.493307	0.44606	0.527824	0.375485	0.484264	0.665527	0.630647	0.394799	0.474968	0.427933	0.393411
116	78	2.463	LPEt(16:1)	LPEt	C21 H41 O7 N0 P1	LPEt(16:1)-H	D	0.696268	0.266943	0.67237	0.268206	0.120967	0.385982	0.400486	0.432339	0.271535	0.259489	1.3506	0.864284	1.87756	1.42788	0.935869	0.34422	0.257075	0.447643	0.296216	0.317018	0.326582	1.46011	0.910373	0.559791	0.803475	2.08184	2.18384	0.174858	0.563008	1.00132	0.26978	0.233184	0.803545	0.591764	0.288833	1.31684	0.863787	0.650861	0.62156	0.713576	1.08063	0.213387
117	79	1.1	LPEt(16:2)	LPEt	C21 H39 O7 N0 P1	LPEt(16:2)-H	D	3.51954	0.62363	1.98762	0.638614	0.261399	0.888897	0.796618	0.719352	0.558378	0.573001	3.86297	2.02597	3.14689	1.42832	1.72967	0.322256	0.245802	0.226506	0.269177	0.342243	0.238887	1.23688	0.419882	0.377955	0.553215	3.84358	2.88892	0.237543	0.74785	1.67507	0.380948	0.317437	0.566654	0.154167	0.348248	0.362541	0.838693	0.727887	0.593596	0.574277	0.150798	0.230133
118	80	2.645	LPEt(18:1)	LPEt	C23 H45 O7 N0 P1	LPEt(18:1)-H	B	0.50784	0.00154384	0.708837	0.134627	0.0609596	0.182106	0.240559	0.191649	0.239026	0.0896387	0.295274	0.221113	0.291588	1.76112	1.19329	0.315847	0.26546	0.17644	0.310256	0.2282	0.188922	0.432032	0.4374	0.107157	0.164418	5.28998	2.37749	0.084057	1.8655	3.27546	0.750301	0.889931	1.78713	1.21843	0.916673	1.10768	1.44663	2.13287	0.220326	1.01189	1.20783	0.593338
119	81	2.184	LPEt(18:2)	LPEt	C23 H43 O7 N0 P1	LPEt(18:2)-H	B	0.556664	0.00898981	1.08895	0.107023	0.00276693	0.202748	0.353571	0.345267	0.244596	0.276408	0.31901	0.259374	0.262669	1.73012	1.20656	0.194729	0.173538	0.121941	0.124203	0.177787	0.0627998	0.217924	0.212824	0.0797151	0.0698357	5.75911	2.94544	0.0752613	1.97582	3.12888	0.652016	0.58934	1.35905	1.15224	0.633027	0.863405	0.691118	1.04203	0.740462	0.500467	0.935887	0.305915
120	82	1.017	LPG(16:0)	LPG	C22 H45 O9 N0 P1	LPG(16:0)-H	A	5.7751	4.57959	6.42545	3.4529	1.62818	4.1019	4.59717	0.486664	3.31021	4.47458	2.69069	2.07383	2.38568	0.869412	1.74667	1.39288	0.980318	0.983626	0.991513	1.40821	2.9185	1.17643	1.00543	0.589642	0.755991	2.11465	2.94961	0.568168	1.27349	1.37394	0.993311	0.790773	0.31952	0.301061	0.466846	0.240152	1.2727	1.24383	1.22043	0.502928	0.187372	0.665774
121	83	2.269	LPG(16:0)	LPG	C22 H45 O9 N0 P1	LPG(16:0)-H	B	3.22106	1.93843	3.44361	1.68646	0.797642	2.21729	2.14473	1.89418	2.23917	2.48965	1.21633	1.16845	1.05864	0.940679	0.879629	0.626822	0.535763	0.523602	0.487792	0.553423	0.362438	0.557384	0.821963	0.271067	0.365763	0.93545	1.76601	0.27179	0.477957	0.683054	0.3443	0.292353	0.404269	0.556585	0.234209	0.111963	0.321631	0.348964	0.250677	0.210298	0.0947795	0.21506
122	84	2.027	LPI(16:0)	LPI	C25 H49 O12 N0 P1	LPI(16:0)-H	A	1.74695	0.484127	1.2596	0.453379	0.360765	1.49629	2.30595	2.17437	1.78678	1.67652	1.76812	1.42555	1.60004	1.73051	1.80939	1.98553	1.48891	1.77012	1.67979	1.42952	1.62282	1.9233	2.13889	1.29587	1.77588	1.83249	3.16345	0.57125	0.765732	1.62064	0.724667	0.564466	1.04153	1.01381	0.661469	1.21243	1.19082	1.11167	0.7815	0.756447	1.04619	1.01959
123	85	1.576	LPI(18:2)	LPI	C27 H49 O12 N0 P1	LPI(18:2)-H	A	1.62338	1.21876	1.17797	0.960902	0.851388	0.591524	1.72126	1.19978	1.15182	0.737224	0.912937	0.750578	0.766848	0.881148	0.818655	0.857275	0.678612	1.02782	1.05431	0.793213	0.61672	0.854674	0.964914	0.368036	0.658275	0.808877	1.06616	0.790521	0.69411	0.919413	0.751094	0.613226	1.3313	1.18179	0.812533	1.73998	1.96887	1.43008	1.30798	0.565356	0.821605	0.71668
124	86	2.039	LPS(16:0)	LPS	C22 H44 O9 N1 P1	LPS(16:0)-H	A	1.22126	0.592663	1.04935	0.643649	0.410046	0.846625	2.53588	2.03684	1.6039	1.16089	1.11489	1.01615	0.952407	1.45963	1.19566	1.39311	1.16569	1.24358	1.13011	1.25663	0.839709	1.46589	2.24448	0.664147	0.944243	0.689223	1.03173	0.390626	0.457742	0.822963	0.582202	0.45057	0.931781	0.664218	0.578677	1.14333	0.946768	1.04875	0.701493	0.546224	0.989684	0.82051
125	87	1.07	MGDG(11:2/12:4)	MGDG	C32 H48 O10	MGDG(11:2/12:4)+HCOO	B	0.328948	0.335342	0.328189	0.271196	0.234627	0.843918	0.718369	0.716443	0.994143	0.709532	2.1483	2.11836	1.68678	1.61391	1.27447	1.75587	1.46549	7.92643	2.20786	1.06971	1.39455	1.74295	1.12345	1.85248	1.51884	0.879028	1.09228	1.46353	0.819626	1.17816	1.57942	1.39932	1.51796	2.49237	1.22163	1.07943	11.0463	1.28925	1.68726	1.4396	1.52558	1.11185
126	88	4.904	MGDG(18:2/18:3)	MGDG	C45 H76 O10	MGDG(18:2/18:3)+HCOO	A	1.50167	1.19017	1.19831	0.962489	0.937671	1.59924	1.27928	1.22827	1.15271	0.974621	1.45274	1.61221	1.55133	1.34383	1.35722	1.82396	1.71213	1.79055	1.54424	1.24671	2.60304	2.06143	1.62573	1.94953	1.87347	1.66174	1.40927	1.22753	0.986892	1.2159	1.89888	1.87148	1.40284	1.23017	1.23643	0.00976474	1.98291	1.82463	1.72428	1.72781	0.00574118	2.05335
127	89	4.577	MGDG(18:3/18:3)	MGDG	C45 H74 O10	MGDG(18:3/18:3)+HCOO	A	1.30245	1.04545	1.05563	0.855757	0.81503	1.54714	1.29661	1.20427	1.17931	1.04068	1.60232	1.53063	1.5066	1.35105	1.25037	1.72389	1.65102	1.56885	1.36661	1.26568	1.74593	1.7014	1.53697	1.48389	1.37545	1.68031	1.66892	1.59344	1.49184	1.30358	1.76828	1.72703	1.61642	1.46114	1.35439	0.00333187	1.72312	1.66442	1.5483	1.36527	0.00422776	1.79083
128	90	1.834	MGDG(28:7)	MGDG	C37 H56 O10	MGDG(28:7)-H	D	0.172223	0.257788	0.200291	0.196304	0.194171	0.541868	0.308711	0.786197	0.497715	0.714244	1.4951	1.72625	1.81221	1.20979	1.57528	1.57065	1.30512	3.03589	2.55321	1.45744	1.26625	1.82222	1.23521	1.76068	1.45906	0.155066	0.156232	0.482716	0.510286	0.44539	0.804386	0.737503	0.774112	2.15038	0.954664	0.674995	2.88689	0.901286	1.18066	0.756779	0.67041	0.63548
129	91	5.56	MGDG(37:4)	MGDG	C46 H80 O10	MGDG(37:4)-H	D	0.909463	0.76846	0.758472	0.527124	0.484393	1.18703	0.955942	0.930562	0.857961	0.809046	1.23273	1.18787	1.15469	0.819527	1.01669	0.981123	0.838846	0.653896	0.569815	0.633337	0.941207	1.07162	0.954698	0.589644	0.890409	1.43546	1.41351	0.751851	0.66701	0.923034	0.982865	0.960703	1.04657	0.615839	0.804591	1.08499	1.15749	1.1036	0.627724	0.852221	1.21431	0.826409
130	92	4.513	MGDG(40:11)	MGDG	C49 H72 O10	MGDG(40:11)-H	C	0.966042	1.27359	1.21963	1.21005	0.928254	0.893394	1.38694	0.991443	0.994712	0.888353	0.533636	0.465431	0.387807	0.419111	0.369771	0.331224	0.304273	0.298717	0.304299	0.30961	0.271848	0.32952	0.503763	0.206209	0.228896	1.50266	2.09457	2.44235	2.96309	1.87397	1.11343	1.1404	1.38893	2.109	1.28825	0.657902	0.962834	0.969408	0.900558	0.685716	0.421724	0.502877
131	93	4.642	PA(14:0/18:2)	PA	C35 H65 O8 N0 P1	PA(14:0/18:2)-H	B	0.950205	0.752473	1.21735	0.647528	0.464326	0.656913	0.591858	0.542579	0.412473	0.461199	1.07065	0.785403	0.847013	0.564696	0.521432	0.251951	0.228674	0.188193	0.290123	0.251105	0.152358	0.279052	0.319904	0.199665	0.221977	2.54755	2.51842	0.529605	1.04803	1.24334	0.601574	0.618113	0.849631	1.1845	0.631034	0.568019	0.650049	0.642918	0.637044	0.837533	0.632651	0.600138
132	94	4.887	PA(15:0/18:2)	PA	C36 H67 O8 N0 P1	PA(15:0/18:2)-H	B	1.55341	1.05362	1.45044	0.866428	0.534654	0.972132	0.604594	0.635544	0.492601	0.493243	0.605825	0.53424	0.542582	0.3871	0.429554	0.268677	0.217028	0.215031	0.221839	0.23584	0.247051	0.326145	0.323778	0.232857	0.238078	3.53785	3.20422	0.876397	1.42028	1.67458	0.607216	0.763569	0.628503	0.794774	0.508843	0.431159	0.564838	0.457131	0.437913	0.548926	0.463044	0.473022
133	95	3.432	PA(16:0/18:1)	PA	C37 H71 O8 N0 P1	PA(16:0/18:1)-H	B	1.6325	0.503343	0.846487	0.504576	0.579297	0.865214	0.842727	0.8606	0.692419	0.867196	1.07882	0.576118	0.718536	0.702685	1.12303	0.961593	0.615298	0.448314	0.461955	0.528202	0.660186	0.547429	0.691812	0.556513	0.606326	1.87398	1.42974	0.261899	0.536791	0.69095	0.601891	0.592728	0.57132	0.508776	0.495196	0.335281	0.42055	0.537159	0.603137	0.434852	0.195687	0.391165
134	96	5.496	PA(16:0/18:1)	PA	C37 H71 O8 N0 P1	PA(16:0/18:1)-H	B	0.664747	0.695541	0.664653	0.605081	0.429416	0.682004	0.76891	0.705333	0.636	0.716338	0.871016	0.703337	0.788461	0.673947	0.604934	0.651576	0.571292	0.491806	0.559127	0.55957	0.440781	0.672244	0.824173	0.40114	0.430534	1.36414	1.49111	0.7486	1.09684	0.97632	0.646904	0.714568	1.01514	1.13782	0.713924	0.615104	0.792693	0.685043	0.53904	0.521533	0.54864	0.451889
135	97	5.103	PA(16:0/18:2)	PA	C37 H69 O8 N0 P1	PA(16:0/18:2)-H	B	1.48864	1.18411	1.4409	1.06059	0.754484	0.736373	0.787098	0.732744	0.628285	0.748106	1.06731	0.843129	0.893976	0.692222	0.641879	0.414861	0.400113	0.314424	0.364983	0.407248	0.24945	0.395577	0.343994	0.242366	0.238851	1.59023	1.63683	0.588226	0.905285	0.94359	0.523039	0.547611	0.666723	0.733797	0.537756	0.382176	0.459841	0.398976	0.341279	0.43719	0.389547	0.336658
136	98	4.68	PA(16:0/18:3)	PA	C37 H67 O8 N0 P1	PA(16:0/18:3)-H	B	4.89659	2.46881	3.93439	1.9314	0.118708	0.721651	0.493854	0.600897	0.260004	0.424785	1.93469	1.25771	1.57794	0.783112	0.908938	0.270659	0.246862	0.179684	0.219211	0.273615	0.618156	0.527135	0.320539	0.283302	0.345803	3.30521	3.08273	0.520042	1.2776	1.45273	0.621394	0.684313	1.00504	0.787575	0.742426	0.569291	0.737863	0.49392	0.513143	0.819624	0.486745	0.285881
137	99	5.75	PA(17:0/18:1)	PA	C38 H73 O8 N0 P1	PA(17:0/18:1)-H	B	0.715699	0.775517	0.81025	0.670955	0.531206	0.634508	0.601699	0.375763	0.401853	0.548282	0.460469	0.425117	0.393796	0.321286	0.325789	0.261867	0.233979	0.160937	0.197902	0.23112	0.173852	0.242777	0.295142	0.15763	0.168612	3.03375	2.92421	1.4958	1.96371	1.92668	0.894968	1.03773	0.852173	1.76178	0.84266	0.53702	0.601805	0.64993	0.529483	0.546907	0.588352	0.529723
138	100	5.362	PA(17:0/18:2)	PA	C38 H71 O8 N0 P1	PA(17:0/18:2)-H	B	1.11751	0.620608	1.15537	0.767137	0.589204	0.638846	0.568112	0.481395	0.376059	0.489544	0.435007	0.508342	0.412993	0.369135	0.372296	0.225952	0.142995	0.15682	0.180575	0.193673	0.170293	0.226483	0.248745	0.145612	0.180276	2.85234	3.39804	1.15392	1.78748	1.99491	0.921769	0.972829	0.695071	1.43749	0.630969	0.580721	0.735091	0.577851	0.693265	0.797096	0.569188	0.420156
139	101	5.979	PA(18:0/18:1)	PA	C39 H75 O8 N0 P1	PA(18:0/18:1)-H	B	0.681719	0.782009	0.792093	0.683855	0.4723	0.56862	0.639427	0.624797	0.538324	0.721836	0.967785	0.727588	0.927744	0.659342	0.664274	0.66723	0.565084	0.411117	0.507653	0.574848	0.222245	0.433622	0.467041	0.203508	0.250079	1.38089	1.38494	0.529764	0.851704	0.9004	0.735718	0.791397	0.713025	1.64835	0.755173	0.362879	0.474661	0.5285	0.495168	0.624443	0.394145	0.311428
140	102	5.123	PA(18:1/18:2)	PA	C39 H71 O8 N0 P1	PA(18:1/18:2)-H	B	0.800766	0.364837	0.794533	0.354301	0.176548	0.791992	0.50625	0.557958	0.414229	0.520961	1.90545	1.21775	1.99557	1.02465	1.06631	0.345794	0.31538	0.288508	0.278562	0.35016	0.280868	0.966552	0.411255	0.485975	0.553653	2.20995	2.04454	0.421403	0.907781	1.12297	0.494328	0.532693	0.800249	0.59079	0.493352	0.596453	0.702096	0.550503	0.549563	0.659034	0.513581	0.29834
141	103	6.905	PA(18:1/22:0)	PA	C43 H83 O8 N0 P1	PA(18:1/22:0)-H	B	1.04214	0.38518	0.536591	0.482376	0.606267	0.434291	0.24908	0.222285	0.188951	0.991998	0.319146	0.271901	0.733904	0.449151	0.181948	0.606217	0.311109	0.118614	0.207489	0.688882	0.169049	0.248067	0.242396	0.097691	0.147265	2.04076	3.22592	0.848109	0.716319	1.32829	1.21884	0.952587	1.34407	3.10559	0.983979	0.517724	0.919256	0.31749	0.229628	0.304602	0.271568	0.18875
142	104	7.294	PA(18:1/24:0)	PA	C45 H87 O8 N0 P1	PA(18:1/24:0)-H	B	0.745085	0.846263	0.970218	0.931539	0.558337	0.47596	0.61123	0.533764	0.468643	0.583093	0.505344	0.463018	0.492223	0.303883	0.337802	0.42672	0.339863	0.173841	0.273934	0.264463	0.189111	0.328864	0.286318	0.153747	0.120194	1.99948	1.84115	0.891897	1.6042	1.39358	0.648151	0.713806	0.878676	1.52136	0.72629	0.52707	0.510331	0.502918	0.373949	0.35683	0.387323	0.297374
143	105	4.555	PA(18:2/17:2)	PA	C38 H67 O8 N0 P1	PA(18:2/17:2)-H	B	2.083	0.638373	1.9793	0.525642	0.303384	0.998342	0.617283	0.559549	0.335215	0.530884	1.27141	0.932384	0.917583	0.484668	0.640191	0.197926	0.173162	0.124545	0.130567	0.163512	0.137653	0.283888	0.239737	0.171779	0.154285	4.0641	4.32192	0.658632	1.59708	2.0176	0.443676	0.491338	0.503591	0.651714	0.402493	0.280061	0.440973	0.305214	0.313101	0.400442	0.325007	0.210269
144	106	4.449	PA(18:3/18:2)	PA	C39 H67 O8 N0 P1	PA(18:3/18:2)-H	B	4.20833	1.40046	3.62474	1.04341	0.585956	0.876152	0.678139	0.564407	0.392937	0.560816	0.949883	0.905516	0.937495	0.508156	0.561339	0.28573	0.276812	0.22195	0.263689	0.263459	0.232239	0.383151	0.419121	0.243601	0.229249	0.173221	0.166589	0.0794448	0.0851772	0.106387	0.0713061	0.0802916	0.075075	0.0880537	0.0713294	0.0156226	0.0871163	0.0813464	0.0688647	0.0655078	0.0200228	0.0804881
145	107	4.15	PA(18:3/18:3)	PA	C39 H65 O8 N0 P1	PA(18:3/18:3)-H	B	6.26426	1.6608	3.65006	1.06781	0.614002	0.700987	0.762276	0.491136	0.361757	0.431768	0.653642	0.589621	0.753223	0.393165	0.474386	0.321919	0.308876	0.293514	0.307885	0.28265	0.271932	0.368032	0.446034	0.262308	0.288726	0.172652	0.169883	0.146027	0.139327	0.129288	0.186975	0.158279	0.178186	0.157996	0.142108	0	0.187259	0.155793	0.135962	0.117482	0	0.151571
146	108	5.371	PA(19:1/18:2)	PA	C40 H73 O8 N0 P1	PA(19:1/18:2)-H	B	1.47687	0.339602	0.431329	0.590565	0.112997	0.281816	0.913688	0.254559	0.28031	0.263654	1.3582	0.27096	0.414155	0.389759	0.408269	0.454176	0.0902133	0.044555	0.122342	0.415044	0.0551753	0.583111	0.162335	0.292068	0.356941	3.12763	2.44172	0.317784	1.03747	1.28115	0.476867	0.409488	0.597781	0.630102	0.44463	0.409061	0.518964	0.405195	0.405638	0.445294	0.368786	0.157035
147	109	5.574	PA(20:1/18:2)	PA	C41 H75 O8 N0 P1	PA(20:1/18:2)-H	B	2.38557	0.706424	1.4983	0.709536	0.28479	1.00455	0.497082	0.510372	0.444433	0.695912	1.81006	1.20633	1.67475	0.645726	0.942755	0.353289	0.238244	0.223479	0.306235	0.269511	0.230571	0.462424	0.321322	0.242403	0.314902	3.19772	2.69342	0.326004	1.02884	1.3622	0.484256	0.505186	0.682901	0.540376	0.412775	0.448718	0.526077	0.459069	0.466352	0.535611	0.396721	0.250888
148	110	6.988	PA(24:0/18:2)	PA	C45 H85 O8 N0 P1	PA(24:0/18:2)-H	B	1.13913	1.22617	1.6966	1.20437	0.654196	0.474429	0.466449	0.590931	0.434693	0.566178	0.534323	0.519179	0.606773	0.370775	0.40013	0.186525	0.178118	0.12514	0.184465	0.188561	0.0965759	0.190662	0.227801	0.099857	0.107383	1.98154	2.09389	0.664814	1.31392	1.07568	0.299482	0.332387	0.416028	0.6537	0.324014	0.238348	0.246758	0.222034	0.248528	0.251114	0.211976	0.173628
149	111	4.755	PC(14:0/18:2)	PC	C40 H76 O8 N1 P1	PC(14:0/18:2)+HCOO	A	0.394433	1.18043	0.615434	0.89089	0.9189	0.322431	0.566475	0.680268	0.505084	0.757931	0.306527	0.283173	0.230906	0.201269	0.191786	0.262083	0.280874	0.233043	0.351578	0.366776	0.0884517	0.142705	0.205208	0.074598	0.0864279	0.664872	1.04215	1.81237	1.89503	1.06062	1.48353	1.55938	1.67771	3.41532	1.65731	0.780959	0.955675	1.30529	1.24307	0.964366	0.472359	0.50009
150	112	5.367	PC(15:0/18:1)	PC	C41 H80 O8 N1 P1	PC(15:0/18:1)+HCOO	A	0.384292	1.1052	0.658225	0.910841	0.76769	0.198685	0.527232	0.444284	0.293057	0.522972	0.0526154	0.0475036	0.0388725	0.011716	0.018114	0.0368262	0.00472684	0.0103965	0.0214225	0.0411512	0.0044706	0.0281041	0.0117643	2.01825e-05	0	1.85143	2.79362	3.39229	3.90484	2.67315	1.46022	1.62271	1.45484	3.41459	1.61346	0.516994	0.687787	0.830178	0.899632	0.847685	0.191713	0.367533
151	113	4.994	PC(15:0/18:2)	PC	C41 H78 O8 N1 P1	PC(15:0/18:2)+Cl	B	0.909613	1.73044	1.43873	1.34114	1.63686	0.525099	0.491264	1.19252	0.375105	0.570242	0.179593	0.164065	0.0991272	0.121047	0.0506739	0.1353	0.0568161	0.106783	0.0910994	0.04009	0.114128	0.108584	0.0652717	0.0393802	0.079777	0.828933	0.988947	2.21059	3.46992	2.3625	0.755427	0.810802	0.666067	1.42004	0.926904	0.317402	0.530584	0.497031	0.641574	0.36006	0.234353	0.214664
152	114	4.655	PC(15:0/18:3)	PC	C41 H76 O8 N1 P1	PC(15:0/18:3)+HCOO	A	1.4882	3.3492	1.75031	3.10056	2.21451	0.372093	0.761427	0.661645	0.410085	0.574347	0.2789	0.363082	0.256956	0.191593	0.272283	0.328243	0.167726	0.238916	0.178271	0.200124	0.0579321	0.17778	0.171662	0.159361	0.132641	0.837997	0.674353	0.373649	0.358053	0.561131	0.258587	0.214826	0.292107	0.267201	0.206564	0.014144	0.153776	0.185164	0.124201	0.145273	0.00537633	0.147442
153	115	5.584	PC(16:0/16:0)	PC	C40 H80 O8 N1 P1	PC(16:0/16:0)+HCOO	A	1.78522	0.578898	0.959316	0.367783	0.226441	1.77828	0.733087	0.643657	0.710746	0.573994	0.629492	0.633302	0.47565	0.767666	0.674702	0.518989	0.334284	0.352205	0.390464	0.298009	0.504242	0.444578	0.516549	0.35296	0.354316	3.10581	2.69576	0.475961	0.99452	1.33562	0.560532	0.612733	0.653913	0.60589	0.54237	0.491597	0.772853	0.591439	0.384397	0.353133	0.422858	0.422866
154	116	5.83	PC(16:0/17:0)	PC	C41 H82 O8 N1 P1	PC(16:0/17:0)+HCOO	A	0.989279	0.443773	0.750887	0.297082	0.265608	1.05964	0.396888	0.300092	0.253282	0.384919	0.296991	0.273624	0.26506	0.359373	0.317771	0.246036	0.173253	0.148387	0.181718	0.17748	0.215671	0.265455	0.313271	0.178159	0.208861	5.62062	4.22629	0.867632	1.81087	2.175	0.834186	0.846599	0.779071	1.09982	0.5975	0.59299	0.761008	0.697348	0.580241	0.60107	0.637636	0.647599
155	117	5.592	PC(16:0/18:1)	PC	C42 H82 O8 N1 P1	PC(16:0/18:1)+Cl	B	0.809719	1.50606	1.00121	1.18065	0.978838	0.511308	0.744584	0.737907	0.602122	0.673971	0.504475	0.492412	0.380653	0.367817	0.303385	0.348137	0.319855	0.263097	0.27597	0.342823	0.219751	0.165968	0.208743	0.138926	0.118927	1.19483	1.68981	1.60897	1.94183	1.4935	1.20045	1.18693	1.27279	1.78919	1.13319	0.745849	0.848492	0.884354	0.8081	0.791457	0.544487	0.572651
156	118	5.215	PC(16:0/18:2)	PC	C42 H80 O8 N1 P1	PC(16:0/18:2)+Cl	B	1.07854	1.72786	1.17889	1.52206	1.31482	0.55643	0.840007	0.72588	0.673852	0.757391	0.530255	0.506319	0.438886	0.397181	0.325265	0.313255	0.300527	0.289281	0.296113	0.339737	0.193518	0.199118	0.242477	0.12292	0.151847	0.922233	1.22418	1.44984	1.39665	1.11252	0.997849	0.982498	1.04752	1.50594	1.02198	0.581501	0.731681	0.769933	0.730453	0.633628	0.463007	0.445461
157	119	4.785	PC(16:1/18:2)	PC	C42 H78 O8 N1 P1	PC(16:1/18:2)+Cl	B	0.5171	1.15537	0.615045	0.767401	1.01125	0.457898	0.850534	0.900578	0.783442	0.944741	0.51433	0.462107	0.437774	0.496627	0.322102	0.649088	0.668914	0.525035	0.655795	0.936735	0.151666	0.318342	0.582812	0.229415	0.200057	0.633022	0.944499	1.91927	1.70454	1.00423	1.03534	1.12634	1.34907	1.8334	1.4218	0.79599	0.919533	0.7679	0.498627	0.577432	0.212414	0.402483
158	120	4.464	PC(16:2/18:2)	PC	C42 H76 O8 N1 P1	PC(16:2/18:2)+HCOO	A	0.930335	2.3702	1.21053	1.82255	1.81951	0.408328	0.867885	0.98929	0.626719	0.933496	0.358251	0.303167	0.252412	0.209165	0.21419	0.162832	0.194537	0.179295	0.247214	0.28857	0.0641797	0.110478	0.200056	0.0516404	0.0608448	0.316006	0.577661	1.14137	1.37282	0.722432	0.37277	0.313283	0.472388	0.769333	0.431212	0.183728	0.233703	0.264021	0.192685	0.140498	0.243096	0.298367
159	121	4.153	PC(16:2/18:3)	PC	C42 H74 O8 N1 P1	PC(16:2/18:3)+HCOO	A	1.65999	5.06086	2.34071	3.50892	3.70665	0.290775	0.565086	0.50477	0.361392	0.703508	0.270361	0.219611	0.187959	0.0814534	0.146362	0.110379	0.127786	0.158299	0.158342	0.220073	0.0326402	0.0841781	0.108155	0.0148592	0.0324275	0.211799	0.13589	0.106183	0.199252	0.0858967	0.0712261	0.0186112	0.101284	0.161612	0.0421267	0.0529916	0.104008	0.0606956	0.0121154	0.0354025	0.0474269	0.0254961
160	122	6.052	PC(17:0/17:0)	PC	C42 H84 O8 N1 P1	PC(17:0/17:0)+HCOO	A	0.76891	0.723571	0.708889	0.631796	0.540532	0.761868	0.733325	0.711956	0.672885	0.560093	0.715744	0.74301	0.690553	0.638154	0.572222	0.694275	0.682104	0.703652	0.668327	0.575174	0.736696	0.6639	0.70262	0.67944	0.572861	0.815563	0.816585	0.732736	0.645192	0.601351	0.736107	0.708761	0.704265	0.714791	0.576548	0.583265	0.78149	0.728583	0.672188	0.599797	0.558459	0.901341
161	123	5.854	PC(17:0/18:1)	PC	C43 H84 O8 N1 P1	PC(17:0/18:1)+HCOO	A	0.322191	0.619141	0.500291	0.521646	0.458624	0.201195	0.355312	0.336006	0.209406	0.33092	0.163614	0.199146	0.172277	0.116044	0.116991	0.155423	0.152542	0.129335	0.14513	0.169219	0.0512914	0.0848533	0.104173	0.0467194	0.0437562	1.87219	2.59938	2.89617	3.07807	2.17464	1.41222	1.78961	1.30254	3.53135	1.58508	0.580021	0.751988	1.00048	0.960434	0.997297	0.475189	0.525396
162	124	5.465	PC(17:1/18:1)	PC	C43 H82 O8 N1 P1	PC(17:1/18:1)+HCOO	A	0.492232	1.02795	0.725686	0.874666	0.78188	0.302916	0.542419	0.50968	0.395903	0.493227	0.257088	0.2568	0.204429	0.182795	0.166541	0.141053	0.184452	0.164966	0.187371	0.213751	0.0927972	0.141786	0.2233	0.0599804	0.0805831	1.36416	1.91258	2.5978	2.76844	1.95091	1.36386	1.69349	1.31386	2.98753	1.5529	0.649146	0.838545	1.02327	0.937312	0.86177	0.440987	0.585513
163	125	5.013	PC(17:1/18:2)	PC	C43 H80 O8 N1 P1	PC(17:1/18:2)+HCOO	A	0.349411	0.856949	0.640266	0.636698	0.591572	0.48395	0.930169	0.958537	0.765628	0.954385	0.44148	0.394186	0.318254	0.313651	0.283539	0.289792	0.321534	0.253078	0.315753	0.348491	0.124383	0.225199	0.396186	0.0975416	0.0954414	0.996346	1.5745	2.07058	2.30554	1.62996	0.891745	1.02024	1.18981	1.73544	0.995454	0.538	0.715825	0.731035	0.597511	0.449428	0.34107	0.413316
164	126	6.304	PC(18:0/17:0)	PC	C43 H86 O8 N1 P1	PC(18:0/17:0)+HCOO	A	0.51605	0.30862	0.433006	0.259203	0.200407	0.499635	0.34339	0.265149	0.230322	0.296889	0.215022	0.242084	0.226722	0.318035	0.242169	0.3673	0.288826	0.198242	0.248738	0.267996	0.230188	0.344268	0.314349	0.181423	0.174821	3.73	3.16672	0.725352	1.36793	1.63118	0.833471	0.977983	0.843456	1.98618	0.767567	0.574735	0.735735	1.00353	0.721957	0.751033	0.725817	0.783181
165	127	6.518	PC(18:0/18:0)	PC	C44 H88 O8 N1 P1	PC(18:0/18:0)+HCOO	A	0.4666	0.285835	0.329322	0.224765	0.146599	0.54201	0.383805	0.336797	0.236443	0.341257	0.431648	0.521127	0.465874	0.746718	0.543097	1.4451	0.96732	0.451758	0.819982	0.72297	0.555027	1.04753	0.874667	0.310633	0.373007	1.38851	1.4005	0.361705	0.740451	0.608337	0.775699	0.821997	0.694567	1.70735	0.699122	0.458368	0.6422	0.809972	0.661384	0.733766	0.719504	0.702424
166	128	6.073	PC(18:0/18:1)	PC	C44 H86 O8 N1 P1	PC(18:0/18:1)+Cl	B	0.30727	0.681609	0.520983	0.549429	0.445967	0.307202	0.637301	0.623063	0.441022	0.612816	0.542819	0.548502	0.541279	0.443864	0.390186	0.629131	0.599335	0.613285	0.687238	0.656876	0.156808	0.24266	0.334232	0.0999833	0.127859	0.96767	1.31968	1.29648	1.35134	1.11603	1.55554	1.64614	1.42516	2.73453	1.53165	0.580712	0.805806	0.986998	0.935178	0.915114	0.420885	0.424147
167	129	5.142	PC(18:1/14:0)	PC	C40 H78 O8 N1 P1	PC(18:1/14:0)+HCOO	A	0.305391	0.786815	0.475967	0.617608	0.511334	0.214059	0.395434	0.439119	0.379323	0.448822	0.211332	0.212219	0.203653	0.176327	0.168849	0.213403	0.224359	0.232486	0.270787	0.255035	0.0450675	0.118667	0.197799	0.0585636	0.0499681	0.927317	1.47266	2.02157	2.23204	1.38662	1.6632	1.86214	1.86689	4.33333	1.94132	0.809145	1.08835	1.54441	1.43439	1.26483	0.523227	0.640246
168	130	5.624	PC(18:1/18:1)	PC	C44 H84 O8 N1 P1	PC(18:1/18:1)+Cl	B	0.407426	0.354351	0.283218	0.588282	0.489879	0.474893	0.517021	0.78202	0.752607	1.02002	0.674217	0.62738	0.596435	0.541772	0.655319	0.870127	0.535714	0.809169	0.902591	0.841209	0.433811	0.688056	1.00645	0.331412	0.409416	0.776608	0.986394	1.16527	0.873821	1.03373	1.27154	1.25728	1.36473	2.38091	1.83482	0.882827	1.15426	1.17982	0.847076	0.827471	0.588695	0.673029
169	131	5.24	PC(18:1/18:2)	PC	C44 H82 O8 N1 P1	PC(18:1/18:2)+Cl	B	0.550506	0.953895	0.693973	0.815255	0.717994	0.764612	1.14416	1.11906	1.04354	1.08714	0.95101	0.829351	0.767853	0.753794	0.594859	0.973913	0.86015	0.806162	0.800868	0.955972	0.428098	0.663024	0.908368	0.388431	0.382564	0.800749	1.03012	1.33427	1.27744	1.04448	0.81453	0.773614	1.13873	1.18055	0.851746	0.735129	0.892626	0.766078	0.662928	0.537665	0.457936	0.51094
170	132	6.753	PC(18:1/21:0)	PC	C47 H92 O8 N1 P1	PC(18:1/21:0)+HCOO	A	0.259939	0.462836	0.3075	0.349583	0.296569	0.215495	0.198452	0.46814	0.327947	0.46243	0.0774857	0.327453	0.07043	0.694741	0.0774207	0.31711	0.267776	0.0551966	0.33402	0.134959	0.408415	0.0170056	0.0402254	0.340421	0.0149937	1.58441	2.39951	2.34812	2.54043	1.9318	1.42073	1.73119	1.35196	4.95473	1.7403	0.674871	0.820475	1.12139	1.02294	1.22847	0.582909	0.532757
171	133	6.963	PC(18:1/22:0)	PC	C48 H94 O8 N1 P1	PC(18:1/22:0)+HCOO	A	0.352117	0.709195	0.59423	0.607917	0.489178	0.269169	0.464153	0.510204	0.369505	0.537925	0.330281	0.256932	0.255304	0.240896	0.217744	0.358752	0.274769	0.236407	0.291345	0.330165	0.106401	0.175796	0.265623	0.0884585	0.107756	1.40919	2.03269	1.51747	2.20877	1.62582	1.31013	1.2712	1.33486	3.09278	1.44294	0.715424	0.884046	1.10234	1.0055	0.676736	0.465667	0.405558
172	134	7.168	PC(18:1/23:0)	PC	C49 H96 O8 N1 P1	PC(18:1/23:0)+HCOO	A	0.343735	0.886125	0.529021	0.712065	0.524792	0.238069	0.446337	0.335068	0.260463	0.444221	0.177333	0.158062	0.123518	0.0907325	0.118749	0.0726929	0.112183	0.0406462	0.105612	0.113869	0.01506	0.0730887	0.118986	0.0458615	0.008149	1.80381	3.44662	2.39624	3.48858	2.46644	1.07914	1.54792	1.20384	3.08155	1.1003	0.590779	0.722551	0.93783	0.707767	0.676451	0.406449	0.427285
173	135	7.35	PC(18:1/24:0)	PC	C50 H98 O8 N1 P1	PC(18:1/24:0)+HCOO	A	0.481142	0.944105	0.765759	0.873068	0.704303	0.406604	0.648011	0.671794	0.471173	0.696973	0.356081	0.311642	0.293668	0.264031	0.249095	0.237502	0.247707	0.194594	0.250035	0.289574	0.132896	0.201802	0.288513	0.0980005	0.0951216	1.4152	2.02698	1.55751	2.18484	1.48081	0.844001	0.874935	1.0352	1.75229	0.924319	0.501471	0.578898	0.704802	0.664371	0.464421	0.327766	0.31457
174	136	4.655	PC(18:2/17:2)	PC	C43 H78 O8 N1 P1	PC(18:2/17:2)+HCOO	A	0.745442	1.85975	1.10098	1.53549	1.41031	0.478062	1.0755	1.12678	0.786715	1.03923	0.332533	0.346242	0.250029	0.237538	0.194609	0.156301	0.190901	0.153359	0.194908	0.241055	0.054198	0.0863925	0.143588	0.0453216	0.0424608	0.578297	0.991457	1.66256	1.93914	1.16334	0.486615	0.49904	0.714222	1.11945	0.612469	0.213509	0.302449	0.335367	0.27302	0.192201	0.103685	0.124318
175	137	4.35	PC(18:2/17:3)	PC	C43 H76 O8 N1 P1	PC(18:2/17:3)+HCOO	A	1.25366	3.80617	1.7867	2.86135	2.81428	0.268944	0.680286	0.708853	0.42523	0.561017	0.217388	0.284361	0.177818	0.172399	0.14304	0.113855	0.12122	0.125626	0.141997	0.190845	0.0378667	0.05625	0.108586	0.0317766	0.0312325	0.024767	0.0468591	0.0708935	0.0759369	0.0476241	0.0216623	0.0247311	0.0460299	0.0563851	0.0332003	0.0101919	0.0217655	0.019831	0.0174574	0.0162265	0.00449124	0.00831119
176	138	4.854	PC(18:2/18:2)	PC	C44 H80 O8 N1 P1	PC(18:2/18:2)+HCOO	A	0.904899	1.58782	1.06412	1.3829	1.14456	0.748452	1.15772	1.25871	1.00212	1.29247	0.835134	0.692942	0.538673	0.551956	0.465115	0.450742	0.47619	0.425739	0.493868	0.628782	0.186614	0.29211	0.468509	0.160537	0.161293	0.522041	0.766678	1.01001	1.12288	0.788608	0.483296	0.539311	0.678668	0.80038	0.548528	0.323325	0.454848	0.417044	0.325662	0.246582	0.1838	0.208265
177	139	6.392	PC(18:2/21:0)	PC	C47 H90 O8 N1 P1	PC(18:2/21:0)+HCOO	A	0.394548	0.859482	0.610138	0.72464	0.615509	0.257156	0.506277	0.518522	0.328805	0.491241	0.243736	0.246052	0.192193	0.163796	0.159083	0.254591	0.192907	0.221855	0.231598	0.233563	0.0968608	0.156651	0.294856	0.0774442	0.0646073	1.18402	2.0448	2.44395	2.67929	1.71612	1.02234	1.3763	1.00118	3.5719	1.32211	0.408958	0.569119	0.782946	0.718393	0.752434	0.268874	0.362231
178	140	6.829	PC(18:2/23:0)	PC	C49 H94 O8 N1 P1	PC(18:2/23:0)+HCOO	A	0.641439	1.6057	1.12307	1.26189	1.10728	0.310022	0.58136	0.510345	0.407253	0.587683	0.217234	0.216205	0.153511	0.145727	0.122892	0.109579	0.134494	0.0680282	0.118667	0.1378	0.0607353	0.0992357	0.110447	0.0425212	0.0440227	1.37913	1.87355	1.95556	2.52398	1.63375	0.855064	0.889987	0.872919	2.02357	0.857851	0.39153	0.488233	0.62597	0.450288	0.411611	0.260127	0.293505
179	141	4.052	PC(18:3/17:3)	PC	C43 H74 O8 N1 P1	PC(18:3/17:3)+HCOO	A	1.7349	4.82373	1.43318	3.28797	3.73575	0.106812	0.392583	0.40004	0.248512	0.255943	0.118925	0.127561	0.102905	0.0541647	0.0585145	0.0430359	0.105838	0.068913	0.0982361	0.117793	0	0.0289963	0.0843672	0.00806795	0.00988244	0.00155695	0.00688258	0	0	0.00685417	0	0	0.0110284	0.00227389	0	0	0	0	0	0.0120582	0	0
180	142	4.549	PC(18:3/18:2)	PC	C44 H78 O8 N1 P1	PC(18:3/18:2)+Cl	B	1.19499	2.20524	1.42724	1.735	1.80499	0.490448	1.00896	0.97116	0.786764	0.888732	0.505982	0.531725	0.467113	0.349641	0.312022	0.301372	0.306013	0.304728	0.34804	0.436373	0.119533	0.166451	0.276087	0.084048	0.0984731	0.0663457	0.0947888	0.106202	0.153137	0.0811216	0.0588323	0.0576529	0.0874524	0.0929707	0.0629304	0.0233485	0.0552404	0.053204	0.0357298	0.0293964	0.0118455	0.0312894
181	143	4.241	PC(18:3/18:3)	PC	C44 H76 O8 N1 P1	PC(18:3/18:3)+Cl	B	1.78697	3.58296	1.63021	2.97824	3.04985	0.393586	0.599742	0.643998	0.406661	0.589052	0.457865	0.271021	0.283026	0.186352	0.153361	0.186362	0.209768	0.24772	0.257397	0.293392	0.0822983	0.110666	0.119572	0.199742	0.0947338	0.0707251	0.213942	0.0558749	0.308494	0.3112	0.280995	0.154716	0.089848	0.258978	0.23565	0.0167948	0.0769051	0.0609461	0.169867	0.202525	0.0121111	0.152257
182	144	4.636	PC(18:3/20:3)	PC	C46 H80 O8 N1 P1	PC(18:3/20:3)+HCOO	A	1.79544	3.87993	1.82521	2.97219	3.34324	0.173628	0.328785	0.377184	0.175955	0.344192	0.14579	0.136872	0.106593	0.0795653	0.0832571	0.0615124	0.0776684	0.0450702	0.0653483	0.101984	0.0166223	0.0511097	0.032702	0.0111856	0.0139734	0.00162646	0.0174353	0.00289169	0.0167589	0.000100427	5.58976e-05	0.00100936	7.82504e-05	0.0193415	0.000170264	0.0025714	0.00125887	0.00287813	0.00108888	0.00567264	5.08717e-06	0.00361803
183	145	6.305	PC(19:0/18:1)	PC	C45 H88 O8 N1 P1	PC(19:0/18:1)+HCOO	A	0.183241	0.299907	0.240381	0.249014	0.244298	0.142771	0.285609	0.307077	0.202538	0.244019	0.319421	0.271213	0.226192	0.11304	0.186903	0.174769	0.297083	0.267141	0.511501	0.490824	0.0371648	0.0763928	0.102032	0.0277711	0.0639949	1.53582	2.32041	2.52195	2.67611	1.89234	1.6252	2.12365	1.31848	5.86484	2.0082	0.459783	0.651745	1.00454	1.04282	1.1079	0.377902	0.377526
184	146	5.864	PC(19:1/18:1)	PC	C45 H86 O8 N1 P1	PC(19:1/18:1)+HCOO	A	0.298012	0.651077	0.491184	0.62772	0.528921	0.36075	0.616386	0.673324	0.540032	0.581336	0.373619	0.864289	0.303165	0.268773	0.212695	1.38902	0.38291	1.40219	0.405542	1.21649	0.152042	1.45594	2.93803	0.733199	0.144631	1.28682	2.13861	2.34177	2.68308	1.86125	1.30163	1.57913	1.64526	6.49557	1.39251	0.808425	1.1454	1.23023	0.912667	0.760776	0.484775	0.66068
185	147	5.47	PC(19:1/18:2)	PC	C45 H84 O8 N1 P1	PC(19:1/18:2)+HCOO	A	0.870082	1.95092	0.950596	1.61351	0.948068	0.401851	0.931848	0.736261	0.585151	0.865748	0.365809	0.41827	0.258744	0.23146	0.212409	0.481975	0.236521	0.21348	0.261875	0.294462	0.198912	0.290055	0.705368	0.145768	0.168307	0.689613	1.12494	1.63629	1.8265	1.17018	0.611874	0.696912	0.823175	1.23107	0.750892	0.329521	0.330901	0.500345	0.300624	0.298469	0.194391	0.206673
186	148	6.53	PC(20:0/18:1)	PC	C46 H90 O8 N1 P1	PC(20:0/18:1)+Cl	B	0.0589841	0.0900006	0.111969	0.189039	0.160052	0.185197	0.394022	0.474332	0.367058	0.532494	0.381782	0.338017	0.342553	0.29683	0.317677	0.512673	0.433096	0.389154	0.436293	0.471582	0.0489504	0.202458	0.302738	0.0239169	0.048216	0.830731	1.13761	1.14149	1.51379	0.995764	1.69402	1.57736	1.50981	3.62008	2.1054	0.769418	1.06804	1.30147	1.1851	1.25685	0.599559	0.505622
187	149	6.061	PC(20:1/18:1)	PC	C46 H88 O8 N1 P1	PC(20:1/18:1)+HCOO	A	0.37409	0.853237	0.568496	0.704851	0.554304	0.370794	0.627059	0.66881	0.652178	0.695866	0.412798	0.354748	0.386796	0.310207	0.272221	0.544089	0.433972	0.450364	0.518089	0.509468	0.17286	0.324939	0.516651	0.128525	0.180032	0.944024	1.29759	1.51529	1.92279	1.267	0.985898	1.11039	1.41937	1.77228	1.19993	0.767893	1.07189	1.26259	0.795426	0.668861	0.371298	0.419132
188	150	5.686	PC(20:1/18:2)	PC	C46 H86 O8 N1 P1	PC(20:1/18:2)+HCOO	A	1.18273	2.14983	1.44247	1.88616	1.48282	0.611179	0.959216	0.951597	0.905701	0.952253	0.553158	0.421552	0.416804	0.359579	0.303496	0.367304	0.41079	0.315252	0.389404	0.450851	0.118508	0.22314	0.324383	0.107282	0.117092	0.739123	1.06152	1.27708	1.62359	1.0252	0.549075	0.596506	0.768878	0.825246	0.589971	0.401436	0.50901	0.555666	0.37004	0.264873	0.208012	0.22494
189	151	5.298	PC(20:2/18:2)	PC	C46 H84 O8 N1 P1	PC(20:2/18:2)+HCOO	A	1.13112	2.20393	1.40242	1.85491	1.58077	0.56143	1.07908	1.07548	0.888744	1.05562	0.573145	0.494371	0.411331	0.384712	0.313643	0.275562	0.329503	0.24497	0.31618	0.399939	0.0835957	0.139234	0.197918	0.073453	0.0807266	0.442673	0.608963	0.900177	1.12025	0.679611	0.366961	0.392756	0.496597	0.647686	0.430212	0.201449	0.272604	0.278138	0.201503	0.156085	0.0932253	0.101107
190	152	4.958	PC(20:3/18:2)	PC	C46 H82 O8 N1 P1	PC(20:3/18:2)+HCOO	A	1.52242	3.37444	2.08424	2.67402	2.69881	0.362614	0.694339	0.70653	0.452332	0.595307	0.275794	0.260102	0.258384	0.189189	0.158289	0.125461	0.161967	0.121985	0.151163	0.199965	0.0446279	0.0890382	0.0929713	0.0346839	0.0375879	0.0213085	0.0331232	0.0324876	0.0491166	0.032579	0.0187818	0.0222428	0.0290639	0.0360687	0.0245841	0.00813216	0.0169649	0.0192046	0.011604	0.00901871	0.00414652	0.00832894
191	153	6.608	PC(22:0/18:2)	PC	C48 H92 O8 N1 P1	PC(22:0/18:2)+HCOO	A	0.563923	1.41876	0.828855	1.17474	0.9607	0.369369	0.607399	0.0121469	0.56573	0.794195	0.339346	0.359485	0.284152	0.226109	0.211993	0.237346	0.221524	0.206453	0.251064	0.266922	0.0708511	0.116261	0.178802	0.0577996	0.0657443	0.693242	1.12912	1.32286	1.4241	0.955294	0.911054	0.966265	1.02032	2.30785	0.863601	0.385535	0.577115	0.804524	0.647925	0.55708	0.246383	0.250323
192	154	6.139	PC(22:1/18:2)	PC	C48 H90 O8 N1 P1	PC(22:1/18:2)+HCOO	A	0.866569	2.02701	1.31114	1.52841	1.31482	0.49465	0.931912	0.950855	0.774062	1.01068	0.429675	0.384989	0.278532	0.241782	0.316525	0.211906	0.285494	0.171321	0.352827	0.346617	0.124226	0.108623	0.148141	0.0625905	0.0552113	0.786813	1.1664	1.13318	1.57905	0.996875	0.445034	0.475689	0.615838	1.30551	0.596085	0.202929	0.322558	0.374481	0.262206	0.189855	0.0532611	0.0630801
193	155	7.026	PC(24:0/18:2)	PC	C50 H96 O8 N1 P1	PC(24:0/18:2)+HCOO	A	0.696082	1.54093	1.12352	1.31949	1.11458	0.455434	0.863761	0.937508	0.636305	0.870987	0.391461	0.407618	0.311653	0.272823	0.258361	0.22729	0.18948	0.167567	0.225446	0.282283	0.0954509	0.141916	0.199487	0.0807376	0.0695475	0.904473	1.35353	1.23916	1.70605	1.0943	0.602215	0.622776	0.736948	1.29541	0.680564	0.306553	0.408802	0.42483	0.425475	0.272236	0.240472	0.188828
194	156	6.734	PC(24:0/18:3)	PC	C50 H94 O8 N1 P1	PC(24:0/18:3)+HCOO	A	1.23033	3.04613	1.96436	2.27168	2.06328	0.490669	0.741421	0.964492	0.527456	0.697481	0.465025	0.456951	0.358049	0.303783	0.257333	0.234545	0.250909	0.183795	0.262451	0.29897	0.0905443	0.170055	0.227456	0.060747	0.0511623	0.0375607	0.143915	0.121717	0.202019	0.16173	0.089117	0.146424	0.0992993	0.199306	0.0613815	0.015419	0.0612757	0.0799061	0.0569779	0.0198686	0	0.00522652
195	157	7.733	PC(26:0/18:1)	PC	C52 H102 O8 N1 P1	PC(26:0/18:1)+HCOO	A	0.681429	1.49704	0.945993	1.19502	0.947169	0.575895	0.822279	0.681372	0.704071	0.919095	0.412159	0.397423	0.292759	0.270972	0.283914	0.25281	0.196923	0.168943	0.206604	0.310745	0.123421	0.166995	0.243799	0.0988592	0.131775	1.17299	2.01366	1.48202	1.59669	1.52654	0.688436	0.768832	0.810072	1.28145	0.788551	0.49064	0.571877	0.507029	0.505277	0.304584	0.352829	0.306972
196	158	3.131	PC(8:0e/10:0)	PC	C26 H54 O7 N1 P1	PC(8:0e/10:0)+HCOO	B	1.57642	1.25532	1.74259	1.02607	0.661407	0.879664	1.18853	0.970098	0.947085	1.20179	1.01828	0.974959	1.10671	0.969066	0.882704	1.28766	0.910794	0.642937	0.633932	0.617182	0.20928	0.438364	0.579291	0.124808	0.240115	1.83501	3.49323	0.44017	0.979572	1.38999	0.745992	0.728432	0.570223	1.04093	0.503942	0.328622	0.511259	0.527613	0.442769	0.535658	0.302169	0.33945
197	159	2.509	PC(8:0e/8:0)	PC	C24 H50 O7 N1 P1	PC(8:0e/8:0)+HCOO	B	2.09999	3.1478	3.41198	1.70389	1.68468	1.04836	1.49512	1.19511	1.22841	1.27673	0.735551	0.713183	0.63518	0.60184	0.544805	0.289461	0.258913	0.186382	0.192464	0.307217	0.198089	0.181208	0.350563	0.174626	0.189887	2.28097	3.41076	0.704895	1.47121	1.75576	0.620935	0.576884	0.599518	0.953704	0.450918	0.311339	0.227652	0.309976	0.359345	0.449446	0.243226	0.18595
198	160	2.635	PC(8:0p/10:0)	PC	C26 H52 O7 N1 P1	PC(8:0p/10:0)+HCOO	B	0.638458	0.82199	0.774833	0.722014	0.4669	0.514529	0.993095	1.01043	1.00866	0.266922	0.891937	0.71791	0.753916	0.745504	0.63526	1.0179	0.85566	0.800107	0.966383	0.964259	0.378562	0.856775	1.6364	0.444328	0.472064	1.07687	1.32253	0.582051	0.962738	1.05234	0.631206	0.584834	0.689348	1.07881	0.561334	0.714384	0.739266	0.838344	0.623351	0.590162	0.391955	0.401216
199	161	4.897	PE(14:0/18:2)	PE	C37 H70 O8 N1 P1	PE(14:0/18:2)-H	A	0.705701	1.47774	1.06496	1.21889	0.878637	0.480236	0.877473	0.937553	0.740643	0.859777	0.585122	0.516491	0.463055	0.381236	0.338428	0.33302	0.35502	0.273774	0.324368	0.362679	0.112112	0.221226	0.338951	0.110903	0.111191	0.512399	0.815951	1.01722	1.14462	0.778475	0.644403	0.81161	0.933527	1.92542	0.855581	0.376809	0.562626	0.644404	0.557509	0.513053	0.283277	0.265456
200	162	5.731	PE(16:0/16:0)	PE	C37 H74 O8 N1 P1	PE(16:0/16:0)-H	B	1.26781	0.290441	0.817533	0.26194	0.120381	2.00547	0.656226	0.614079	0.761023	0.682798	0.718142	0.618261	0.679959	0.948679	0.812463	0.582035	0.460657	0.390383	0.417272	0.354939	0.748112	0.781519	0.84292	0.615065	0.632209	2.8944	2.08025	0.250834	0.796209	1.06515	0.376438	0.403328	0.567976	0.45018	0.371911	0.278256	0.437452	0.438217	0.253962	0.240611	0.313125	0.279057
201	163	5.767	PE(16:0/18:1)	PE	C39 H76 O8 N1 P1	PE(16:0/18:1)-H	B	0.596395	1.01093	0.911281	0.816279	0.61147	0.685317	0.945652	0.975481	0.828878	0.94423	0.79538	0.686188	0.784156	0.632193	0.555086	0.723858	0.657597	0.623717	0.643191	0.608503	0.403875	0.647567	0.825839	0.415411	0.397411	0.927151	1.16336	1.17543	1.35678	0.971239	0.785189	0.839491	1.07578	1.33176	0.842444	0.615623	0.789097	0.725143	0.628615	0.513288	0.445567	0.442844
202	164	5.388	PE(16:0/18:2)	PE	C39 H74 O8 N1 P1	PE(16:0/18:2)-H	A	0.94322	1.50314	1.2509	1.28767	1.02811	0.773239	1.14741	1.04887	0.965673	1.07596	0.921657	0.784033	0.713291	0.630117	0.56429	0.557527	0.555024	0.453507	0.543728	0.638812	0.24986	0.39537	0.505065	0.226199	0.231809	0.645789	0.866635	0.965083	1.15587	0.781546	0.615673	0.61953	0.771895	1.00444	0.647351	0.37129	0.492796	0.418471	0.395671	0.335607	0.248038	0.248187
203	165	5.04	PE(16:1/18:2)	PE	C39 H72 O8 N1 P1	PE(16:1/18:2)-H	A	0.186244	2.29933	2.07319	1.44029	1.3024	0.150592	0.258923	0.280004	0.634446	0.70192	0.263093	0.168865	0.185994	0.759088	0.713491	0.170698	0.15591	0.128842	0.759022	0.644084	0.354882	0.679308	0.217076	0.0687298	0.330129	0.216643	0.222658	0.162169	0.172051	0.149304	0.267617	0.293145	0.219426	0.253475	0.184281	0.0856975	0.233848	0.224158	0.174414	0.148234	0.0671624	0.164447
204	166	4.593	PE(16:2/18:2)	PE	C39 H70 O8 N1 P1	PE(16:2/18:2)-H	B	0.89858	1.79982	1.13756	1.42875	1.23407	0.424416	0.999994	0.912193	0.834883	0.908568	0.663066	0.567061	0.405857	0.35448	0.303002	0.290446	0.279509	0.277241	0.332439	0.378231	0.137319	0.275886	0.464507	0.128638	0.139027	0.591672	0.557257	0.974357	1.13302	0.734263	0.520401	0.531733	0.77405	1.23404	0.629967	0.303739	0.413637	0.48273	0.374966	0.336038	0.291546	0.273623
205	167	5.989	PE(17:0/18:1)	PE	C40 H78 O8 N1 P1	PE(17:0/18:1)-H	B	0.55081	1.04076	1.0002	0.846148	0.639842	0.464404	0.681438	0.619708	0.488469	0.643008	0.375676	0.366565	0.312011	0.266177	0.245415	0.243441	0.219259	0.172787	0.211727	0.245453	0.109159	0.187989	0.26093	0.10876	0.0996413	1.52273	2.03893	1.92102	2.34957	1.66243	0.904146	1.06672	0.853962	2.23171	0.98779	0.346224	0.44299	0.525852	0.500901	0.575122	0.316246	0.328254
206	168	5.623	PE(17:0/18:2)	PE	C40 H76 O8 N1 P1	PE(17:0/18:2)-H	B	0.925852	1.77174	1.60852	1.3869	1.1718	0.573091	0.883884	0.987052	0.636909	0.758796	0.444427	0.424188	0.359386	0.332467	0.296544	0.230267	0.238285	0.189824	0.219085	0.263286	0.121651	0.189947	0.259614	0.100196	0.112098	1.12269	1.34966	1.5214	1.88841	1.57592	0.735029	0.813223	0.726195	1.69312	0.805176	0.280419	0.404539	0.407306	0.482405	0.453399	0.70444	0.272247
207	169	5.179	PE(17:1/18:2)	PE	C40 H74 O8 N1 P1	PE(17:1/18:2)-H	B	0.466159	0.841612	0.87402	0.683355	0.622147	0.35858	0.619279	0.55472	0.505979	0.568747	0.350342	0.342085	0.281138	1.0773	0.767569	0.23838	0.238498	0.166994	0.250613	0.240706	0.146701	0.258136	0.225502	0.126825	0.1061	2.42908	2.09428	1.20741	2.48224	2.49619	0.988479	1.09849	1.46518	1.53998	1.24811	0.685173	0.872903	0.961614	0.943509	0.820395	0.581164	0.577615
208	170	6.196	PE(18:0/16:0)	PE	C39 H78 O8 N1 P1	PE(18:0/16:0)-H	B	1.06009	0.317088	0.689539	0.266613	0.160091	1.52188	0.607661	0.625551	0.600973	0.708715	0.692878	0.653531	0.548856	0.918756	0.794536	0.665687	0.461093	0.352957	0.431925	0.392283	0.4957	0.718273	0.745821	0.391926	0.44505	2.27308	1.85716	0.338856	0.847633	1.01565	0.424254	0.401236	0.496065	0.732906	0.409328	0.321869	0.410101	0.428226	0.303419	0.279097	0.350894	0.338743
209	171	6.217	PE(18:0/18:1)	PE	C41 H80 O8 N1 P1	PE(18:0/18:1)-H	B	0.667103	1.04963	0.983905	0.875852	0.677679	0.569988	0.833667	0.894229	0.689273	0.862264	0.764072	0.684539	0.740812	0.573801	0.511291	0.792457	0.695896	0.651223	0.737138	0.676542	0.225184	0.460927	0.576482	0.202353	0.236026	0.570482	0.862225	0.730863	0.918592	0.663317	0.752601	0.852559	0.751409	1.93693	0.848906	0.315751	0.47492	0.54403	0.543867	0.561846	0.309509	0.282692
210	172	5.29	PE(18:1/14:0)	PE	C37 H72 O8 N1 P1	PE(18:1/14:0)-H	B	0.517309	0.82954	0.636346	0.71999	0.569386	0.399402	0.605886	0.635871	0.55998	0.693292	0.534172	0.438623	0.467828	0.383732	0.333046	0.389055	0.367976	0.297663	0.381232	0.404771	0.175436	0.299447	0.441524	0.167107	0.189278	0.932229	1.32103	1.28013	1.76226	1.15685	1.00479	1.03453	1.23057	2.25829	1.1907	0.571121	0.815081	0.835222	0.707308	0.683376	0.388531	0.37126
211	173	5.791	PE(18:1/18:1)	PE	C41 H78 O8 N1 P1	PE(18:1/18:1)-H	B	0.504898	0.806198	0.657055	0.67339	0.514786	0.516621	0.780636	0.832604	0.737934	0.803734	0.7982	0.639835	0.757599	0.63244	0.545863	0.972447	0.870991	0.849014	0.9182	0.829826	0.472885	0.860755	1.21053	0.459768	0.501404	0.558221	0.678602	0.757435	0.901214	0.674998	0.880358	0.991643	1.11353	1.5245	0.941557	0.719067	0.916892	1.00466	0.783446	0.681036	0.522335	0.510352
212	174	5.415	PE(18:1/18:2)	PE	C41 H76 O8 N1 P1	PE(18:1/18:2)-H	B	0.508575	0.841584	0.647954	0.70581	0.569285	0.637647	0.99541	1.00201	0.920075	1.00906	0.948091	0.757687	0.788181	0.682933	0.619246	0.790472	0.7416	0.673839	0.778762	0.847701	0.351387	0.656676	0.939037	0.334943	0.360938	0.72523	0.851953	1.0451	1.2623	0.922072	0.853039	0.89408	1.14568	1.3601	0.88433	0.704125	0.854588	0.879	0.718474	0.550181	0.435124	0.451125
213	175	5.296	PE(18:1/19:3)	PE	C42 H76 O8 N1 P1	PE(18:1/19:3)-H	B	1.18108	2.35753	2.01463	1.86516	1.43775	0.779569	1.36402	1.35157	1.08268	1.32658	0.735365	0.642516	0.552143	0.487493	0.422683	0.328213	0.296602	0.277819	0.338345	0.378582	0.116647	0.242685	0.290181	0.118566	0.119937	0.195735	0.209979	0.269599	0.299889	0.213013	0.145311	0.175484	0.200425	0.284179	0.190819	0.0926032	0.132059	0.14278	0.126063	0.102208	0.00415123	0.0655113
214	176	5.03	PE(18:2/18:2)	PE	C41 H74 O8 N1 P1	PE(18:2/18:2)-H	A	0.786621	1.03168	0.928746	0.865036	0.68499	0.766344	0.90104	0.981478	0.838197	0.960904	0.937426	0.757963	0.823921	0.799601	0.756738	0.661141	0.684161	0.46946	0.694436	0.635775	0.214956	0.591379	1.04639	0.20373	0.242162	0.937316	1.20691	0.905179	0.983965	0.899545	0.77687	0.900615	1.0238	1.26218	0.78066	0.643172	0.942063	0.906962	0.655467	0.48531	0.407532	0.321384
215	177	4.683	PE(18:3/18:2)	PE	C41 H72 O8 N1 P1	PE(18:3/18:2)-H	A	1.35795	2.6322	1.9781	2.03121	1.85794	0.470732	0.915787	0.954752	0.649907	0.830327	0.469051	0.499294	0.475717	0.3498	0.318962	0.281552	0.293521	0.290498	0.332828	0.393778	0.116592	0.192333	0.270824	0.0989156	0.101676	0.0521059	0.0680127	0.077522	0.098202	0.0674058	0.0671414	0.0697568	0.092033	0.125752	0.0782404	0.0338332	0.0758622	0.0855957	0.0623103	0.0471583	0.0197609	0.0422966
216	178	4.365	PE(18:3/18:3)	PE	C41 H70 O8 N1 P1	PE(18:3/18:3)-H	B	1.4028	3.03679	1.87787	2.1195	2.15735	0.470249	0.854535	0.863809	0.542148	0.719679	0.495901	0.516899	0.480737	0.364099	0.306117	0.340329	0.354581	0.330966	0.407728	0.416326	0.207737	0.267701	0.316992	0.176818	0.147711	0.144407	0.152821	0.148026	0.135813	0.113014	0.152035	0.143067	0.14214	0.142825	0.127268	0.00198269	0.137725	0.132525	0.126931	0.116512	0	0.137984
217	179	6.437	PE(19:0/18:1)	PE	C42 H82 O8 N1 P1	PE(19:0/18:1)-H	B	0.427784	0.640963	0.68425	0.621623	0.520635	0.380318	0.510039	0.479913	0.30857	0.500624	0.356215	0.333442	0.359994	0.325425	0.284468	0.364762	0.342017	0.267077	0.277421	0.30646	0.120296	0.267695	0.24832	0.100805	0.102126	1.57918	2.2543	1.94615	2.21389	1.39984	1.20791	1.49285	1.31463	4.60049	1.6202	0.408781	0.595077	0.843485	0.811657	0.944858	0.471258	0.442473
218	180	5.991	PE(19:1/18:1)	PE	C42 H80 O8 N1 P1	PE(19:1/18:1)-H	B	0.281183	0.628375	0.525351	0.50664	0.403601	0.402677	0.762456	0.605535	0.566372	0.686455	0.431924	0.444453	0.402006	0.40421	0.321153	0.424822	0.387621	0.332759	0.404877	0.424567	0.167535	0.328329	0.506664	0.145118	0.198831	0.824432	1.23341	1.30652	1.69394	1.26442	1.06745	1.20823	1.28895	2.11552	1.19568	0.632389	0.826277	0.997002	0.756125	0.706235	0.445989	0.470038
219	181	4.92	PE(19:3/18:2)	PE	C42 H74 O8 N1 P1	PE(19:3/18:2)-H	B	1.39647	2.96636	2.42841	2.278	1.9781	0.700846	1.16921	1.17155	0.73349	1.07287	0.446364	0.417869	0.33988	0.323416	0.267287	0.180659	0.180848	0.171338	0.206436	0.218772	0.0715816	0.141322	0.188476	0.0676914	0.0713357	0.0139961	0.0123814	0.0122257	0.0283526	0.0178985	0.0141904	0.00817457	0.016342	0.0229962	0.0146863	0.0107553	0.0176833	0.0205624	0.0117746	0.00480743	0.00810873	0.0168608
220	182	6.665	PE(20:0/18:1)	PE	C43 H84 O8 N1 P1	PE(20:0/18:1)-H	A	0.277005	0.470562	0.392438	0.383228	0.292813	0.324362	0.546763	0.609427	0.460132	0.618848	0.581263	0.508813	0.576643	0.449552	0.433374	0.604943	0.490835	0.447026	0.555641	0.497685	0.172452	0.335331	0.495577	0.1427	0.18793	0.771936	1.11637	0.840163	1.06678	0.820088	1.15372	1.30523	1.28137	3.32044	1.22179	0.595999	0.873256	1.00824	0.964796	0.942952	0.581504	0.504063
221	183	6.205	PE(20:1/18:1)	PE	C43 H82 O8 N1 P1	PE(20:1/18:1)-H	A	0.320745	0.595132	0.52322	0.478379	0.385954	0.415086	0.666568	0.686317	0.643696	0.749851	0.561187	0.501067	0.592387	0.446831	0.370002	0.758964	0.672359	0.598658	0.68659	0.616109	0.26925	0.566457	0.916041	0.252741	0.31991	0.798022	1.08608	1.11054	1.50096	1.03889	0.945427	0.993787	1.31375	1.6131	1.08955	0.807072	1.0543	1.20458	0.711103	0.587395	0.438487	0.392538
222	184	5.833	PE(20:1/18:2)	PE	C43 H80 O8 N1 P1	PE(20:1/18:2)-H	B	0.60741	1.08129	0.884948	0.902787	0.757222	0.648943	0.98176	1.00387	0.849558	0.978435	0.856877	0.691123	0.717569	0.563057	0.517615	0.633306	0.639913	0.486349	0.608586	0.695332	0.199409	0.361974	0.519573	0.177973	0.21472	0.757376	0.908169	1.02504	1.30921	0.956294	0.73092	0.799061	0.981594	1.12088	0.785133	0.561213	0.699111	0.732065	0.507444	0.419769	0.333772	0.297482
223	185	5.457	PE(20:2/18:2)	PE	C43 H78 O8 N1 P1	PE(20:2/18:2)-H	B	0.836087	1.48714	1.17789	1.24206	1.03668	0.708528	1.26342	1.24927	1.04012	1.17316	0.895059	0.874951	0.70943	0.627546	0.548463	0.527057	0.553664	0.40719	0.554398	0.691351	0.155873	0.286853	0.337898	0.14261	0.156974	0.500513	0.675851	0.843271	1.02839	0.703686	0.633144	0.726865	0.873164	1.1738	0.753311	0.375372	0.515921	0.548594	0.443216	0.349447	0.235352	0.254477
224	186	6.731	PE(22:0/18:2)	PE	C45 H86 O8 N1 P1	PE(22:0/18:2)-H	A	0.559687	0.943483	0.789544	0.76262	0.596543	0.415234	0.632265	0.692124	0.523899	0.720613	0.563474	0.569949	0.520284	0.408171	0.383367	0.520251	0.488032	0.346163	0.467978	0.483328	0.207305	0.340279	0.396526	0.164155	0.167839	0.723703	0.981641	0.81362	1.02922	0.82813	0.994023	0.958877	1.0143	1.92399	0.938147	0.518174	0.6688	0.749324	0.646167	0.558209	0.409679	0.382263
225	187	7.132	PE(24:0/18:2)	PE	C47 H90 O8 N1 P1	PE(24:0/18:2)-H	A	0.615326	1.04212	1.05303	0.96524	0.768702	0.57866	0.861108	0.906811	0.649962	0.935458	0.609582	0.578331	0.531215	0.462457	0.44202	0.471624	0.409078	0.323894	0.395364	0.478871	0.212829	0.344507	0.44306	0.189533	0.181109	0.726536	1.21073	0.791899	1.12274	0.852745	0.696294	0.72161	0.815111	1.33428	0.760368	0.381282	0.500884	0.492979	0.41236	0.310327	0.304665	0.241037
226	188	7.512	PE(26:0/18:2)	PE	C49 H94 O8 N1 P1	PE(26:0/18:2)-H	B	0.668673	1.41368	1.26158	1.20984	0.890438	0.731311	1.04821	1.02338	0.750345	0.991771	0.635568	0.626705	0.496573	0.473333	0.461259	0.457158	0.375647	0.251101	0.357612	0.325348	0.243874	0.316552	0.385244	0.159491	0.19127	0.662381	0.996328	0.733913	1.03356	0.77144	0.444785	0.47704	0.640845	0.8203	0.508431	0.248876	0.40183	0.325786	0.312216	0.189522	0.276928	0.204037
227	189	5.477	PEt(16:0/14:0)	PEt	C35 H69 O8 N0 P1	PEt(16:0/14:0)-H	B	0.933311	0.286664	0.598517	0.291517	0.144857	0.908155	0.505969	0.486326	0.450302	0.457104	0.60615	0.541626	0.554186	0.674514	0.645312	0.741074	0.57209	0.39003	0.483062	0.464711	0.556998	0.579808	0.769122	0.4854	0.516129	2.80089	1.67038	0.302154	0.61243	0.943583	0.519074	0.719089	0.946954	1.42153	0.610044	0.512309	0.737529	0.756258	0.628952	0.743986	0.681534	0.416032
228	190	5.963	PEt(16:0/16:0)	PEt	C37 H73 O8 N0 P1	PEt(16:0/16:0)-H	B	0.249287	0.148224	0.213383	0.120828	0.0730654	0.222826	0.228306	0.175925	0.15951	0.186131	0.258903	0.312376	0.333613	0.372552	0.433178	2.30572	1.9124	0.503026	1.40527	1.15447	0.496561	0.652903	0.686635	0.214052	0.352048	0.620631	0.51504	0.142806	0.235505	0.283017	0.465521	0.515945	0.429063	3.9377	0.624613	0.320402	0.495064	0.720499	0.791935	2.02621	1.33158	0.660162
229	191	5.497	PEt(16:0/16:1)	PEt	C37 H71 O8 N0 P1	PEt(16:0/16:1)-H	B	0.664346	0.704037	0.664771	0.606159	0.428789	0.682346	0.768894	0.705919	0.635192	0.717026	0.871056	0.702989	0.790245	0.673721	0.612201	0.651963	0.569415	0.486581	0.559931	0.558352	0.44047	0.674742	0.843528	0.404328	0.436191	1.36875	1.49465	0.748492	1.09868	0.977691	0.647907	0.715119	1.01446	1.14417	0.715395	0.615552	0.793144	0.68526	0.539569	0.518049	0.551187	0.451914
230	192	5.103	PEt(16:0/16:2)	PEt	C37 H69 O8 N0 P1	PEt(16:0/16:2)-H	B	1.5096	1.21068	1.48916	1.07553	0.765107	0.746741	0.798181	0.743061	0.637131	0.75864	1.08234	0.866056	0.90289	0.701968	0.650916	0.420702	0.383119	0.319852	0.328328	0.37626	0.252962	0.380002	0.348837	0.245778	0.242214	1.61262	1.65942	0.596508	0.918032	0.956876	0.530403	0.555321	0.675933	0.744129	0.545328	0.382285	0.466315	0.404593	0.346084	0.443345	0.395031	0.351618
231	193	5.555	PEt(16:0/18:1)	PEt	C39 H75 O8 N0 P1	PEt(16:0/18:1)-H	B	0.206303	0.0812205	0.450402	0.0889058	0.0311965	0.156868	0.250282	0.188817	0.138597	0.177386	0.138217	0.216997	0.371464	0.474228	0.327255	0.167	0.162806	0.135631	0.127439	0.122473	0.17223	0.242864	0.199922	0.127869	0.101366	4.38908	2.45216	0.375513	2.07898	2.42635	0.921175	0.969558	1.78186	1.19503	0.856362	0.945987	1.05679	1.22264	0.789043	0.586577	1.53884	1.05166
232	194	5.169	PEt(16:0/18:2)	PEt	C39 H73 O8 N0 P1	PEt(16:0/18:2)-H	B	0.262426	0.0735349	1.27064	0.075462	0.0316949	0.427359	0.359339	0.187193	0.13361	0.208397	0.524521	0.220808	0.339757	0.714814	0.446936	0.141938	0.128109	0.102582	0.0929913	0.0989322	0.13312	0.224911	0.129656	0.0610561	0.0743219	4.39405	2.49793	0.187489	2.18972	2.21999	0.755755	0.785307	1.36043	0.950459	0.732783	0.671362	0.827569	0.877285	0.583594	0.452555	1.30509	1.03226
233	195	4.683	PEt(16:1/16:2)	PEt	C37 H67 O8 N0 P1	PEt(16:1/16:2)-H	B	4.09803	2.07363	0.767355	1.62371	1.30812	0.681119	1.3417	0.518766	0.338772	0.731005	1.38243	0.931015	1.21727	0.727166	0.944186	0.576485	0.530522	0.479634	0.712646	0.702963	0.518935	0.47049	0.636911	0.22903	0.292481	3.30689	3.1779	0.457613	1.37483	1.2457	0.621734	0.582873	1.3605	0.893134	0.754962	0.454131	0.517811	0.396161	0.409585	1.0289	0.353303	0.248935
234	196	5.514	PEt(16:1/18:1)	PEt	C39 H73 O8 N0 P1	PEt(16:1/18:1)-H	B	0.607233	0.475434	0.614158	0.427643	0.280572	0.551113	0.441082	0.443116	0.375831	0.450201	1.25754	0.911091	1.43489	0.764194	0.828262	0.508378	0.422474	0.37818	0.41007	0.419422	0.366482	1.12234	0.614914	0.554752	0.714032	2.12333	1.89503	0.414576	0.813699	1.09604	0.709787	0.774111	0.94593	0.978551	0.687215	0.980677	1.08643	0.823226	0.868695	1.13693	0.818032	0.463156
235	197	5.122	PEt(16:1/18:2)	PEt	C39 H71 O8 N0 P1	PEt(16:1/18:2)-H	B	0.799486	0.364621	0.793922	0.353938	0.176385	0.794205	0.508729	0.55941	0.413359	0.520865	1.91045	1.27437	2.003	1.02217	1.06672	0.347209	0.31623	0.289411	0.278415	0.349909	0.281015	0.971563	0.412244	0.4848	0.552845	2.30814	2.04937	0.422762	0.909219	1.12482	0.49506	0.534292	0.801483	0.590504	0.493026	0.598025	0.701358	0.551776	0.548677	0.659637	0.516388	0.303089
236	198	4.641	PEt(16:2/14:0)	PEt	C35 H65 O8 N0 P1	PEt(16:2/14:0)-H	B	1.06629	0.72952	1.09271	0.624395	0.393875	0.640407	0.578364	0.534003	0.379746	0.476526	1.0114	0.770024	0.847088	0.571115	0.518164	0.254801	0.221963	0.195445	0.282866	0.244313	0.152556	0.278215	0.288451	0.189951	0.20866	2.525	2.45268	0.520055	1.00102	1.07737	0.582415	0.696648	0.821171	0.958668	0.62074	0.495027	0.616318	0.60145	0.629675	0.83835	0.629135	0.522868
237	199	4.747	PEt(16:2/18:2)	PEt	C39 H69 O8 N0 P1	PEt(16:2/18:2)-H	B	1.74051	0.594142	1.59047	0.622908	0.261224	1.07716	0.63377	0.754259	0.465783	0.625004	2.07764	1.38112	1.5757	0.896737	1.065	0.25832	0.229877	0.19812	0.219104	0.267316	0.212999	0.507474	0.313466	0.29512	0.335335	2.05687	1.92289	0.367981	0.791214	1.00704	0.35338	0.368022	0.508781	0.404465	0.340843	0.297957	0.389471	0.318066	0.312669	0.352156	0.303534	0.200786
238	200	4.449	PEt(16:2/18:3)	PEt	C39 H67 O8 N0 P1	PEt(16:2/18:3)-H	B	4.2006	1.39781	3.61818	1.04132	0.584784	0.895488	0.699672	0.571963	0.392151	0.559694	0.970554	0.903371	0.978004	0.50714	0.561381	0.290268	0.280746	0.18939	0.262436	0.263083	0.236245	0.38347	0.419951	0.248657	0.232529	0.137346	0.131431	0.0792859	0.0835569	0.107703	0.0711634	0.080131	0.0749248	0.0878775	0.0711867	0.0155914	0.0713074	0.0811837	0.068727	0.0653768	0.0199828	0.0803271
239	201	4.974	PEt(17:1/18:2)	PEt	C40 H73 O8 N0 P1	PEt(17:1/18:2)-H	B	0.174815	0.0478875	0.63624	0.08456	0.0153008	0.128592	0.181783	0.1495	0.101506	0.0851886	0.0832673	0.114984	0.107348	0.775544	0.565368	0.0830743	0.111037	0.0435309	0.0541424	0.0498685	0.0662511	0.39459	0.133077	0.0494528	0.046211	9.09691	5.47636	0.319212	2.93595	3.55421	1.40757	1.44283	1.70777	0.919827	0.579116	0.664819	0.95486	1.11391	0.644706	0.819098	0.873288	0.635185
240	202	5.979	PEt(18:0/16:1)	PEt	C39 H75 O8 N0 P1	PEt(18:0/16:1)-H	B	0.681007	0.780228	0.799706	0.685443	0.47199	0.569513	0.643892	0.624038	0.538887	0.719118	0.967445	0.728864	0.926195	0.655479	0.663224	0.666838	0.563275	0.410317	0.506616	0.573843	0.220414	0.435267	0.467933	0.203397	0.251304	1.38017	1.38153	0.527144	0.849467	0.899398	0.735205	0.791905	0.721381	1.64804	0.753426	0.36369	0.479941	0.52582	0.49488	0.628164	0.393263	0.310751
241	203	5.575	PEt(18:1/18:1)	PEt	C41 H77 O8 N0 P1	PEt(18:1/18:1)-H	B	0.0522621	0.00735511	0.189531	0.0191532	0.00399531	0.126627	0.104702	0.116423	0.0627279	0.0658745	0.0719158	0.0749192	0.0991571	0.843142	0.598853	0.217586	0.181993	0.113194	0.125216	0.0902518	0.128209	0.306969	0.267165	0.0927353	0.0947686	3.99425	2.06283	0.0665985	1.78577	2.34021	1.00874	1.06556	1.79966	0.638896	0.915961	1.05168	1.43454	1.57034	1.04702	0.853815	1.22975	0.640799
242	204	5.955	PEt(18:1/18:1)	PEt	C41 H77 O8 N0 P1	PEt(18:1/18:1)-H	B	0.210284	0.122611	0.224076	0.313686	0.158641	0.697974	0.574859	0.674105	0.474969	0.303924	0.64841	0.532613	0.789611	0.375898	0.465379	0.504287	0.391307	0.180402	0.187648	0.16918	0.139172	0.368703	0.261544	0.162561	0.199231	1.12213	2.99057	0.338167	0.592826	1.56781	1.09827	1.04365	0.550397	0.566235	0.844964	0.948391	0.548614	0.983539	1.03906	1.20031	0.90548	0.235731
243	205	5.201	PEt(18:1/18:2)	PEt	C41 H75 O8 N0 P1	PEt(18:1/18:2)-H	B	0.16648	0.0161503	0.646908	0.0551743	0.0079271	0.20516	0.26319	0.239185	0.170258	0.183009	0.189933	0.160925	0.144785	1.25969	0.878432	0.2715	0.233486	0.139226	0.170338	0.188173	0.147145	0.295323	0.3038	0.134667	0.124643	3.70838	1.97576	0.109788	1.90381	2.17899	0.767525	0.865063	1.55352	0.77652	0.824455	0.689205	0.901448	1.04534	0.694062	0.573121	0.775755	0.654714
244	206	5.574	PEt(18:1/18:2)	PEt	C41 H75 O8 N0 P1	PEt(18:1/18:2)-H	B	2.38557	0.794477	1.4983	0.725751	0.283522	1.00455	0.497082	0.510372	0.444433	0.695912	1.80369	1.20633	1.61989	0.645726	0.942755	0.353289	0.238244	0.223479	0.306235	0.269511	0.230571	0.462424	0.321322	0.242403	0.314902	3.19772	2.69342	0.326004	1.02884	1.3622	0.484256	0.505186	0.682901	0.540376	0.412775	0.448718	0.526077	0.459069	0.466352	0.535611	0.396721	0.250888
245	207	7.271	PEt(18:1/24:0)	PEt	C47 H91 O8 N0 P1	PEt(18:1/24:0)-H	B	0.0977932	0	0.583016	0	0	0.000819056	0.123199	0.0420431	0	0	0.0514752	0.000256729	0	0.402305	0.0946459	0	0.0298965	0.0426157	0.0481365	0	0	0.0573016	0.0674524	0	0	6.84827	3.98463	0.233676	3.3818	3.78659	1.18028	1.0833	1.82717	1.4711	1.07028	1.03691	0.980754	1.45648	0.67885	0.775599	1.81763	1.18683
246	208	4.62	PEt(18:2/17:2)	PEt	C40 H71 O8 N0 P1	PEt(18:2/17:2)-H	B	0.418429	2.57032	1.50758	0.153776	2.19355	0.337146	0.366273	0.29583	0.189822	0.205218	0.135215	0.239181	0.151521	0.769327	0.42807	0.184499	0.199825	0.157218	0.132706	0.172492	0.1205	0.239167	0.224444	0.1294	0.067227	4.72378	3.12421	0.263766	2.36819	2.7487	0.641243	0.663885	1.09287	0.878693	0.757098	0.41018	0.616842	0.614473	0.426231	0.413807	0.70635	0.578353
247	209	4.828	PEt(18:2/18:2)	PEt	C41 H73 O8 N0 P1	PEt(18:2/18:2)-H	B	0.449351	0.0262877	1.54388	0.14959	0.013038	0.35656	0.51468	0.456642	0.277152	0.314236	0.269946	0.257813	0.19462	1.35333	0.87414	0.252873	0.226817	0.127966	0.182246	0.215214	0.146548	0.266089	0.300253	0.139205	0.125971	3.60656	2.2057	0.160547	2.03196	2.02852	0.64214	0.696693	1.15119	0.73997	0.68818	0.460599	0.640617	0.628151	0.473683	0.343966	0.620784	0.446634
248	210	4.516	PEt(18:3/18:2)	PEt	C41 H71 O8 N0 P1	PEt(18:3/18:2)-H	B	2.17238	0.1393	8.11034	0.822424	0.0588318	0.685555	1.11869	0.517025	0.299366	0.563923	0.541239	0.57586	0.401458	0.930712	0.640104	0.450151	0.452236	0.214897	0.312993	0.353279	0.258616	0.597987	0.755643	0.339002	0.216296	0.247544	0.147103	0.0246901	0.179661	0.179686	0.045327	0.0521294	0.0971449	0.0849719	0.0524655	0.0513681	0.0708389	0.0697629	0.0417713	0.0302575	0.127715	0.084194
249	211	6.46	PEt(20:0/18:1)	PEt	C43 H83 O8 N0 P1	PEt(20:0/18:1)-H	B	0.0115664	0	0.223956	0	0	0.0315369	0.0359584	0.0372756	0.0106026	0.0188004	0.0133288	0.0303706	0.0131325	0.774332	0.433159	0.128274	0.0518849	0.0186482	0.0264908	0.0447732	0.00703722	0.0973496	0.172902	0.0128008	0.0198636	3.99919	2.1002	0.0741348	1.74414	2.59025	1.02963	0.924279	1.30268	1.36026	0.678791	1.08314	1.12485	1.32282	0.953233	0.977418	2.36231	2.05575
250	212	5.241	PEt(20:2/18:2)	PEt	C43 H77 O8 N0 P1	PEt(20:2/18:2)-H	B	0.539826	0.251656	1.37211	0.375046	0.312654	0.432399	0.607262	0.604167	0.639268	0.551946	0.311356	0.393011	0.0802085	0.844357	0.593988	0.256254	0.144189	0.173144	0.240652	0.302656	0.121544	0.193526	0.30992	0.0741482	0.128356	3.13841	1.72604	0.0507693	1.63854	1.99489	0.463323	0.572	0.943096	0.584197	0.616414	0.461057	0.508604	0.571233	0.392208	0.306469	0.405847	0.291743
251	213	6.977	PEt(22:0/18:2)	PEt	C45 H85 O8 N0 P1	PEt(22:0/18:2)-H	B	1.13285	1.27957	1.31813	1.2189	0.526108	0.470481	0.606815	0.596613	0.437866	0.570054	0.487762	0.514858	0.601724	0.367689	0.3968	0.184973	0.176636	0.124098	0.18293	0.186992	0.0957722	0.189075	0.225906	0.0990261	0.106489	1.98267	2.0762	0.659282	1.30298	1.11027	0.29699	0.329621	0.412567	0.649106	0.321318	0.236364	0.244705	0.220187	0.24646	0.249025	0.210212	0.172183
252	214	6.953	PEt(24:0/18:2)	PEt	C47 H89 O8 N0 P1	PEt(24:0/18:2)-H	B	0.305357	0.0336413	1.44595	0.140747	0.0873234	0.397264	0.787751	0.198203	0.194473	0.317358	0.408757	0.232367	0.242478	0.594887	0.487414	0.249574	0.214043	0.223062	0.219545	0.19293	0.187316	0.363593	0.402409	0.259251	0.177115	4.6309	2.82005	0.139918	2.46488	2.90955	0.573599	0.655373	1.008	0.87966	0.53721	0.589995	0.724129	0.73972	0.52706	0.473151	1.09033	0.899848
253	215	5.33	PEt(37:3)	PEt	C42 H77 O8 N0 P1	PEt(37:3)-H	C	0.994424	0.353777	0.873922	0.355861	0.125135	1.06253	0.322921	0.383533	0.289524	0.388427	1.62861	1.31462	1.28951	0.703619	0.77597	0.321443	0.326421	0.172645	0.170455	0.216899	0.136739	0.895443	0.302146	0.187276	0.238647	3.53926	2.37403	0.296943	1.5235	1.71298	0.8315	0.804479	0.774449	0.556072	0.457467	0.494377	0.787414	0.49513	0.450148	0.565151	0.464087	0.283377
254	216	4.95	PEt(37:4)	PEt	C42 H75 O8 N0 P1	PEt(37:4)-H	C	2.75458	0.918763	2.31628	0.767071	0.296538	1.66806	0.555367	0.669753	0.390304	0.54293	1.81603	1.30126	1.11228	0.683241	0.687363	0.236495	0.29023	0.17879	0.172447	0.155347	0.169951	0.544016	0.230626	0.124334	0.145371	3.00122	2.18364	0.36741	1.28425	1.50683	0.539162	0.636965	0.587907	0.552479	0.390083	0.297551	0.484555	0.365649	0.28962	0.34961	0.337642	0.208536
255	217	5.012	PG(15:0/18:1)	PG	C39 H75 O10 N0 P1	PG(15:0/18:1)-H	B	0.741497	1.29909	1.12932	0.914726	0.705437	0.798182	0.994235	1.24073	0.874564	1.00043	0.590191	0.411382	0.44035	0.40651	0.314441	0.254816	0.245975	0.157575	0.188724	0.254211	0.0923129	0.26137	0.408787	0.0633294	0.101941	0.528792	1.31023	0.834764	1.16975	0.640076	0.373523	0.454604	0.556575	1.02198	0.496185	0.179978	0.326414	0.364227	0.265168	0.203361	0.11294	0.155727
256	218	4.636	PG(15:0/18:2)	PG	C39 H73 O10 N0 P1	PG(15:0/18:2)-H	B	1.14644	2.08428	1.79807	1.59927	1.40823	0.94585	1.50224	1.59107	1.13198	1.54129	0.585987	0.486547	0.369169	0.360425	0.293995	0.212507	0.221945	0.187018	0.192384	0.264952	0.155644	0.199976	0.222069	0.110556	0.113687	0.503132	0.734466	0.810961	1.06502	0.621131	0.390261	0.335884	0.386244	0.810175	0.352594	0.0757835	0.240406	0.206947	0.215369	0.18439	0.0775626	0.202121
257	219	5.181	PG(16:0/16:0)	PG	C38 H75 O10 N0 P1	PG(16:0/16:0)-H	B	1.62586	1.18762	1.22148	1.01657	0.968847	1.90791	1.40928	1.19593	1.24856	0.976363	1.38851	1.40522	1.32269	1.19566	1.06188	1.56656	1.4944	1.39593	1.19398	0.950043	1.87155	1.44535	1.09283	1.29307	1.34948	1.45228	1.24407	1.32786	0.871057	0.890776	1.20305	1.32278	1.15236	1.23782	1.07306	0.0557871	1.1629	1.26404	1.15221	1.12167	0.0575431	1.36386
258	220	5.212	PG(16:0/18:1)	PG	C40 H77 O10 N0 P1	PG(16:0/18:1)-H	B	0.923278	1.60372	1.1692	1.13362	1.12759	0.927011	1.295	1.36476	1.27875	1.42419	0.906942	0.663759	0.628054	0.515625	0.49966	0.52271	0.470546	0.405506	0.490992	0.598933	0.202747	0.361263	0.564125	0.180546	0.200805	0.40332	0.608546	0.575421	0.714039	0.480248	0.384992	0.402721	0.512671	0.62277	0.453103	0.228867	0.303352	0.329673	0.257128	0.204095	0.124884	0.175545
259	221	4.855	PG(16:0/18:2)	PG	C40 H75 O10 N0 P1	PG(16:0/18:2)-H	B	0.992907	1.93235	1.39198	1.45297	1.21812	0.932319	1.38456	1.57892	1.27303	1.4814	0.775549	0.707824	0.568653	0.52149	0.442213	0.323744	0.320302	0.273703	0.32945	0.399545	0.160819	0.219755	0.319308	0.120838	0.128758	0.338152	0.565346	0.626641	0.745204	0.463687	0.31938	0.347985	0.436545	0.61609	0.389728	0.11224	0.259413	0.259357	0.226576	0.184036	0.0697489	0.141866
260	222	4.542	PG(16:0/18:3)	PG	C40 H73 O10 N0 P1	PG(16:0/18:3)-H	B	1.33494	2.47107	1.73361	1.72995	1.75332	1.03603	1.26248	1.30804	1.08363	1.16601	0.910873	0.867387	0.787319	0.702595	0.678585	0.79732	0.753752	0.726211	0.655503	0.618681	0.756165	0.684705	0.744868	0.60759	0.558675	0.705676	0.712771	0.685004	0.668037	0.563948	0.715598	0.708092	0.696254	0.718712	0.560632	0.00643076	0.698679	0.698251	0.661599	0.52807	0.00403434	0.710944
261	223	5.64	PG(18:0/16:0)	PG	C40 H79 O10 N0 P1	PG(18:0/16:0)-H	B	0.714071	0.772766	0.789826	0.758844	0.579907	0.781746	0.950337	0.851569	0.610918	0.677383	0.603716	0.641263	0.615401	0.558598	0.611307	0.715821	0.604517	0.592982	0.621828	0.535835	0.476794	0.53121	0.538265	0.371752	0.300701	0.698074	0.848375	0.399625	1.02706	0.720707	0.942197	1.00858	1.0702	2.72215	0.96938	0.0978548	0.693304	0.906708	0.813179	0.883719	0.222835	0.645235
262	224	5.308	PG(18:1/18:1)	PG	C42 H79 O10 N0 P1	PG(18:1/18:1)-H	B	1.14254	1.93752	2.05193	1.46407	1.04958	0.915032	0.946939	1.10306	0.839421	1.16084	0.90132	0.69017	0.780772	0.56926	0.664235	0.38505	0.372345	0.272046	0.326594	0.436354	0.119988	0.199118	0.179701	0.102224	0.103519	0.271087	0.27763	0.171669	0.333186	0.230167	0.24869	0.214335	0.230305	0.51408	0.364482	0.0963452	0.169535	0.194214	0.247193	0.166121	0.0954118	0.111803
263	225	4.882	PG(18:1/18:2)	PG	C42 H77 O10 N0 P1	PG(18:1/18:2)-H	B	0.829667	1.12947	1.7871	0.763416	0.586301	1.76522	1.27471	1.19695	0.944522	1.04479	1.39578	1.00286	1.25393	1.16656	1.03199	0.29454	0.260472	0.197868	0.261856	0.411412	0.193139	0.350714	0.296576	0.150056	0.183614	0.502433	0.446734	0.231264	0.378027	0.355079	0.220475	0.25841	0.478405	0.430421	0.280861	0.225645	0.314221	0.29437	0.237791	0.151745	0.19085	0.155335
264	226	4.529	PG(18:2/18:2)	PG	C42 H75 O10 N0 P1	PG(18:2/18:2)-H	B	1.30462	1.63279	2.93111	1.42978	0.914935	1.80669	1.15262	1.30063	0.884472	1.13749	1.18824	0.812951	0.731871	0.84204	0.795363	0.268943	0.238539	0.172129	0.187961	0.266994	0.210448	0.238992	0.26893	0.153238	0.152563	0.40466	0.351583	0.19053	0.351767	0.286814	0.17864	0.225243	0.378795	0.358556	0.219546	0.17977	0.26673	0.222668	0.204316	0.133493	0.156853	0.154239
265	227	5.1	PG(32:2)	PG	C38 H71 O10 N0 P1	PG(32:2)-H	C	1.47083	1.14401	1.27179	0.948691	0.660162	0.834412	0.838251	0.720592	0.573391	0.709551	1.03085	0.845808	0.839922	0.521193	0.586712	0.412864	0.359633	0.335572	0.251896	0.346586	0.207355	0.351487	0.281981	0.166466	0.15213	1.76676	1.59918	0.67289	0.908782	0.726688	0.529013	0.397874	0.667041	0.697803	0.336898	0.351168	0.576416	0.392877	0.214812	0.327589	0.334053	0.309007
266	228	3.571	PG(33:4)	PG	C39 H69 O10 N0 P1	PG(33:4)-H	C	0.885273	0.207462	0.539628	0.164557	0.072475	0.477827	0.342558	0.409758	0.244731	0.406415	1.39941	0.720546	0.576387	0.331968	0.406854	0.0891732	0.0741985	0.0486046	0.0641679	0.120737	0.0737758	0.107687	0.0692771	0.0443505	0.0612326	1.22771	1.02836	0.109483	0.295503	0.361401	0.0728459	0.0621674	0.143877	0.112765	0.0741305	0.0311689	0.0766076	0.0358427	0.057204	0.0778413	0.0381001	0.0281359
267	229	4.745	PG(34:4)	PG	C40 H71 O10 N0 P1	PG(34:4)-H	C	2.76391	0.528379	1.86684	0.526485	0.197941	1.43362	0.679034	0.801648	0.512858	0.577261	2.82106	1.44862	1.58182	0.763085	0.943261	0.220852	0.206451	0.246367	0.235052	0.261671	0.192398	0.701107	0.214984	0.251297	0.28248	2.6432	1.76147	0.374606	0.633653	0.944698	0.272633	0.481045	0.559396	0.51041	0.341543	0.466511	0.450086	0.226466	0.209038	0.289761	0.357712	0.172304
268	230	5.51	PG(35:2)	PG	C41 H77 O10 N0 P1	PG(35:2)-H	C	1.19153	1.26564	0.842956	1.13875	0.73401	0.557469	0.538134	0.321162	0.282044	0.493071	0.643989	0.395266	0.438757	0.471571	0.383786	0.500493	0.25569	0.176925	0.255288	0.236927	0.106273	0.486883	0.682095	0.0435701	0.09536	2.38046	1.56565	1.3289	0.766833	0.739527	0.356943	0.310449	0.860976	0.714752	0.346513	0.957009	0.780244	0.612405	0.463802	0.28349	0.391382	0.081905
269	231	5.145	PG(35:3)	PG	C41 H75 O10 N0 P1	PG(35:3)-H	C	2.8017	1.99028	2.0225	1.93995	1.10456	0.7911	0.694342	0.457057	0.426488	0.78703	0.815146	0.618659	0.585469	0.570869	0.440481	0.366608	0.271618	0.22097	0.231714	0.258426	0.141401	0.37355	0.387825	0.107885	0.159721	2.55681	1.49779	1.15441	0.616866	0.598928	0.316647	0.315686	0.554147	0.498557	0.31163	0.465978	0.53342	0.513904	0.38482	0.297042	0.24715	0.14506
270	232	5.978	PG(36:4)	PG	C42 H75 O10 N0 P1	PG(36:4)-H	C	1.102	1.04359	0.997998	0.886499	0.561676	0.915103	0.876709	0.819249	0.816459	0.788355	1.48488	1.22568	1.55774	0.802923	0.948557	1.02259	0.943589	0.734776	0.702976	0.677656	0.392122	0.731453	0.642344	0.372599	0.414005	1.45958	1.44827	0.666046	0.838524	0.827693	0.877092	1.00905	0.841655	1.38787	0.858432	0.602654	0.714027	0.855026	0.771492	0.914267	0.661943	0.523422
271	233	5.531	PG(36:5)	PG	C42 H73 O10 N0 P1	PG(36:5)-H	C	1.05971	0.613584	0.900644	0.548404	0.386566	1.02363	0.661635	0.660032	0.484549	0.472303	1.93008	1.64775	2.24075	1.25056	1.32279	0.858793	0.870372	0.810577	0.702697	0.68685	0.900266	2.06527	1.04803	1.27924	1.41607	2.07203	1.79662	0.501188	0.700418	1.08086	1.06942	1.12422	1.20029	0.645602	0.790635	1.66813	1.61952	1.29889	1.27715	1.62864	1.54588	0.975199
272	234	5.131	PG(36:6)	PG	C42 H71 O10 N0 P1	PG(36:6)-H	C	1.32777	0.561593	1.0111	0.443265	0.305509	1.44336	0.70707	0.719322	0.488721	0.653474	2.29065	2.0221	2.14583	1.17822	1.49682	0.680835	0.673728	0.536322	0.423618	0.569336	0.780128	1.65428	0.547723	0.940581	1.09034	2.42221	1.98095	0.638019	0.754996	1.2237	0.834103	0.867108	0.935901	0.505622	0.613773	1.11739	1.07367	0.842775	0.758659	0.895873	1.16048	0.761356
273	235	5.527	PG(37:3)	PG	C43 H79 O10 N0 P1	PG(37:3)-H	C	0.640046	0.473772	0.630588	0.572332	0.321438	0.367528	0.25156	0.184246	0.153614	0.200419	0.980051	0.45805	0.933455	0.451462	0.455177	0.448773	0.181233	0.182775	0.214473	0.140191	0.0554232	1.06735	0.588175	0.0504054	0.294007	5.09306	2.68283	0.782629	0.533355	0.898977	0.310484	0.302737	0.852808	0.577055	0.353356	2.1393	1.31247	0.872679	1.12877	0.754521	0.790007	0.0709098
274	236	4.809	PG(37:5)	PG	C43 H75 O10 N0 P1	PG(37:5)-H	C	3.81144	1.06245	2.7663	1.77924	0.423996	0.924544	0.537706	0.381647	0.236612	0.418457	1.83325	0.987526	1.12817	0.692601	0.630377	0.201392	0.113789	0.0740259	0.0780538	0.118297	0.0562459	0.344129	0.200663	0.0681449	0.0741116	3.89962	2.14461	0.632006	0.596759	0.670503	0.175465	0.121683	0.342011	0.243189	0.165697	0.332247	0.327791	0.241312	0.269168	0.146256	0.15899	0.0688421
275	237	4.291	PI(14:0/18:2)	PI	C41 H75 O13 N0 P1	PI(14:0/18:2)-H	A	1.04434	1.41883	1.06771	1.3393	1.03542	0.733411	1.19181	1.02459	0.959827	1.04843	0.755489	0.552709	0.470398	0.584484	0.445889	0.486514	0.43576	0.388354	0.47867	0.540668	0.191166	0.346106	0.459977	0.183749	0.209118	0.791419	1.20505	1.03694	1.30753	1.06058	0.888929	0.838418	1.06496	1.62621	1.04566	0.404866	0.717213	0.685806	0.540999	0.395859	0.25478	0.275546
276	238	4.51	PI(15:0/18:2)	PI	C42 H77 O13 N0 P1	PI(15:0/18:2)-H	A	1.02359	1.2663	1.23103	1.22386	0.966405	0.875809	1.35623	0.993149	1.01341	0.945761	0.530887	0.462338	0.379411	0.414997	0.392805	0.310642	0.28919	0.292464	0.28371	0.335037	0.247917	0.307312	0.470986	0.209757	0.244354	1.48016	2.06335	2.45756	2.87675	2.03366	1.12062	1.14604	1.42304	2.09841	1.37333	0.594372	0.884931	0.957375	0.88101	0.717574	0.432556	0.48453
277	239	5.047	PI(16:0/16:0)	PI	C41 H79 O13 N0 P1	PI(16:0/16:0)-H	A	0.878677	0.077476	0.388254	0.064434	0.0307518	1.57201	0.596518	0.475253	0.706639	0.335876	0.895535	0.594491	0.802255	1.46144	1.16707	1.02326	0.618521	0.427461	0.634158	0.472772	1.10111	1.17295	0.990634	0.747911	0.864608	4.70687	3.9724	0.310061	0.674928	1.44558	0.84784	1.20694	1.31096	0.76407	0.865926	0.759234	1.25199	1.23799	0.698701	0.662137	0.763485	0.590086
278	240	5.066	PI(16:0/18:1)	PI	C43 H81 O13 N0 P1	PI(16:0/18:1)-H	A	0.484237	0.583601	0.479776	0.505852	0.44592	0.750472	0.995631	0.871064	0.971785	0.829002	0.970778	0.683183	0.829724	0.832049	0.729672	1.26593	1.01109	0.935682	0.993949	0.981322	0.794047	1.14341	1.4401	0.681188	0.798186	1.02537	1.33074	1.04511	1.22618	1.0424	1.28452	1.20979	1.50892	1.47981	1.22218	1.06236	1.57496	1.31078	1.05648	0.89365	0.734242	0.8383
279	241	4.718	PI(16:0/18:2)	PI	C43 H79 O13 N0 P1	PI(16:0/18:2)-H	A	0.910723	1.09104	0.825432	0.948994	0.885472	0.909756	1.21168	1.10259	1.04128	1.03344	0.885212	0.78053	0.68115	0.717855	0.686546	0.750924	0.752813	0.6242	0.720872	0.793343	0.442204	0.583955	0.746887	0.35508	0.416736	0.801438	1.11831	1.26351	1.30412	1.01498	1.12676	1.03366	1.30035	1.42443	1.14501	0.856369	1.16387	1.04722	0.967789	0.763616	0.582958	0.630285
280	242	4.347	PI(16:0/18:3)	PI	C43 H77 O13 N0 P1	PI(16:0/18:3)-H	A	0.956614	1.41741	0.900471	1.29279	1.16874	0.599352	1.17236	0.93946	0.990891	0.826456	0.886337	0.564911	0.481111	0.573468	0.430054	0.513482	0.447147	0.350224	0.449697	0.543045	2.25842	2.54242	3.05709	1.52548	1.63388	0.690783	1.07518	1.15436	1.47838	0.925633	0.760336	0.689864	1.11083	1.18864	0.951022	0.483914	0.763541	0.769762	0.607077	0.475352	0.243995	1.20565
281	243	5.335	PI(17:0/18:1)	PI	C44 H83 O13 N0 P1	PI(17:0/18:1)-H	A	0.500045	0.62322	0.638493	0.606142	0.543746	0.471723	0.675425	0.498052	0.47343	0.445594	0.315157	0.315027	0.278515	0.2809	0.240817	0.352066	0.289865	0.282716	0.280105	0.290884	0.247527	0.336786	0.443911	0.224463	0.24582	2.41401	3.11896	2.74485	2.94563	2.45837	1.67098	1.71559	1.2354	2.6943	1.57672	0.724995	1.02085	1.12992	1.20795	1.31326	0.664612	0.943785
282	244	4.961	PI(17:0/18:2)	PI	C44 H81 O13 N0 P1	PI(17:0/18:2)-H	A	0.746966	0.888178	0.880579	0.860632	0.734099	0.482646	0.660867	0.508909	0.455617	0.439408	0.311877	0.278728	0.231547	0.255467	0.216747	0.23799	0.212832	0.171163	0.196124	0.210639	0.146827	0.194525	0.272129	0.1154	0.129065	1.9262	2.5398	2.41313	2.70752	2.13244	1.41839	1.66349	1.21511	2.80275	1.48161	0.631717	0.917344	1.12551	1.11607	1.19973	0.540727	0.746233
283	245	4.857	PI(17:1/16:0)	PI	C42 H79 O13 N0 P1	PI(17:1/16:0)-H	A	0.597016	0.66466	0.599152	0.541703	0.565623	0.708181	1.05998	0.901885	0.943062	0.575558	0.569003	0.586117	0.50975	0.475356	0.522574	0.472278	0.459899	0.564496	0.569003	0.396551	0.804965	0.964032	1.22296	0.739494	0.84318	1.82937	2.60497	2.10746	2.14726	1.84831	1.82666	1.64623	1.90196	2.32604	1.74664	1.33372	1.82565	1.70512	2.02453	1.58345	1.29714	1.62427
284	246	4.546	PI(17:1/18:2)	PI	C44 H79 O13 N0 P1	PI(17:1/18:2)-H	A	1.07517	1.34181	1.19413	1.23256	0.979151	0.70693	1.14435	0.979762	0.945374	0.818603	0.580633	0.395677	0.351685	0.417852	0.337887	0.333209	0.312386	0.272094	0.298732	0.330938	0.19961	0.331506	0.477731	0.167811	0.244859	1.85776	2.88981	2.63138	3.52934	2.51203	1.18175	1.27464	1.20212	2.18763	1.49031	0.653643	1.00641	0.728118	0.668467	0.560537	0.41888	0.594313
285	247	5.543	PI(18:0/18:1)	PI	C45 H85 O13 N0 P1	PI(18:0/18:1)-H	A	0.718231	0.853286	0.784183	0.858236	0.690754	0.884129	1.20297	1.05424	1.00965	0.969373	0.929584	0.762506	0.910324	0.798337	0.793421	1.48452	1.18064	1.3527	1.32847	1.15099	0.635027	0.926115	1.16481	0.566485	0.682823	0.775838	1.07168	0.85421	0.918844	0.875968	1.00244	1.05029	0.817352	1.39809	0.992619	0.451762	0.729934	0.703265	0.854805	0.856763	0.445687	0.569082
286	248	5.186	PI(18:1/18:1)	PI	C45 H83 O13 N0 P1	PI(18:1/18:1)-H	A	1.42031	0.530964	1.39347	1.40993	1.26182	1.19134	1.48528	0.350765	1.31117	0.41675	1.02511	0.950741	0.317328	0.336237	0.240275	0.586428	0.537895	0.578109	0.602969	0.515364	0.533963	0.898746	1.22264	0.497034	0.520574	0.293675	1.12617	1.10167	1.12523	0.361334	1.34263	0.506719	0.502278	1.68421	0.469802	0.37614	0.606349	0.485585	1.28136	1.20898	0.255059	0.366659
287	249	4.765	PI(18:1/18:2)	PI	C45 H81 O13 N0 P1	PI(18:1/18:2)-H	A	0.933941	1.40797	0.999339	1.21958	1.16909	0.847361	1.16202	1.06663	1.05816	1.00298	0.681505	0.630712	0.629851	0.633706	0.583734	0.879905	0.825584	0.803882	0.838281	0.81911	0.587502	0.96492	1.33979	0.572667	0.657367	0.727808	0.982183	1.20232	1.30483	0.947197	0.752593	0.691419	0.890893	1.00765	0.756184	0.558998	0.781484	0.729758	0.646369	0.451093	0.359151	0.412037
288	250	6.811	PI(18:1/24:0)	PI	C51 H97 O13 N0 P1	PI(18:1/24:0)-H	A	0.8566	0.984853	0.850437	0.902479	0.785834	0.852863	1.11264	0.9359	0.843059	0.855378	0.648134	0.487034	0.543851	0.566747	0.501631	0.903017	0.774949	0.814981	0.742531	0.689075	0.685206	0.914945	1.19592	0.62453	0.654204	0.977615	1.48663	1.00822	1.19854	1.02075	0.678518	0.73792	0.693732	0.77805	0.683581	0.364878	0.623849	0.497928	0.566831	0.440355	0.420867	0.449442
289	251	4.416	PI(18:2/18:2)	PI	C45 H79 O13 N0 P1	PI(18:2/18:2)-H	A	1.6626	2.26869	1.80035	2.09519	1.7356	0.711989	1.20238	1.05125	0.967789	0.965298	0.60712	0.526573	0.464222	0.437683	0.394744	0.335586	0.347725	0.322124	0.350103	0.403293	0.185296	0.289792	0.402521	0.161859	0.168408	0.523034	0.836937	0.915431	1.10566	0.717512	0.32685	0.330008	0.506532	0.583194	0.404175	0.182388	0.315888	0.304667	0.254243	0.183487	0.103467	0.127776
290	252	4.129	PI(18:3/18:2)	PI	C45 H77 O13 N0 P1	PI(18:3/18:2)-H	A	2.31403	3.58446	2.38411	2.75058	2.72656	0.498099	0.965767	0.827467	0.571987	0.685677	0.419778	0.400625	0.365923	0.312912	0.300061	0.258269	0.267793	0.271062	0.277865	0.326519	0.130614	0.19188	0.28893	0.105189	0.117979	0.0412027	0.053139	0.0486576	0.0644541	0.0431735	0.037411	0.0355164	0.0508135	0.0572653	0.0403495	0.0108831	0.0365193	0.0418101	0.0279629	0.0215622	0.00623587	0.022809
291	253	3.864	PI(18:3/18:3)	PI	C45 H75 O13 N0 P1	PI(18:3/18:3)-H	A	1.84807	2.50442	1.33016	1.68839	1.93822	0.354628	0.507444	0.476997	0.360064	0.445599	0.488835	0.358225	0.331704	0.336062	0.306696	0.308823	0.240363	0.216618	0.242832	0.275478	0.191731	0.274045	0.345266	0.159852	0.163766	0.13049	0.149288	0.0894051	0.0902041	0.0935511	0.088507	0.104512	0.0969511	0.0976342	0.0765447	3.468e-05	0.094223	0.10808	0.0693322	0.0683054	0.000898133	0.108396
292	254	5.18	PI(20:1/18:2)	PI	C47 H85 O13 N0 P1	PI(20:1/18:2)-H	A	1.7336	1.70141	1.57546	1.71521	1.6424	0.9004	1.02618	0.754415	0.951655	0.656631	0.629524	0.397172	0.673647	0.622411	0.448413	0.61144	0.596242	0.564576	0.588058	0.456858	0.404778	0.599897	0.458007	0.326841	0.354698	1.0852	1.26947	1.09896	1.14522	1.01068	0.701295	0.610707	0.588472	0.681063	0.646754	0.370723	0.526114	0.59127	0.460771	0.333762	0.299887	0.355649
293	255	6.488	PI(24:0/18:2)	PI	C51 H95 O13 N0 P1	PI(24:0/18:2)-H	A	1.11558	1.24273	1.22473	1.5774	1.01045	0.846496	1.2356	0.791648	0.846379	0.817053	0.574812	0.56353	0.425386	0.486411	0.458177	0.61475	0.52883	0.415995	0.571239	0.499341	0.338925	0.440695	0.541143	0.293936	0.288591	0.809491	1.21799	0.96304	1.14461	0.848669	0.525144	0.579206	0.671906	0.683148	0.580794	0.311677	0.536227	0.46174	0.441427	0.370301	0.286464	0.346592
294	256	4.437	PIP(18:0p/18:2)	PIP	C45 H84 O15 N0 P2	PIP(18:0p/18:2)-H	B	1.27819	2.08469	2.19877	1.68893	0.966729	0.853788	1.75584	1.71303	1.39199	0.944223	0.929424	0.758574	0.839889	0.816361	0.527786	0.679432	0.681389	0.642599	0.481932	0.726698	0.590407	0.538468	0.95968	0.427263	0.478645	0.728134	1.332	1.52302	1.44763	0.806248	0.686973	0.645613	2.00607	0.80563	0.451305	0.850502	1.55064	1.72104	0.78043	0.487683	0.725144	0.926756
295	257	5.079	PIP(40:7p)	PIP	C49 H82 O15 N0 P2	PIP(40:7p)-H	C	0.966872	1.04438	0.592327	0.873138	1.13655	2.24532	2.06158	1.6388	2.07218	1.32023	1.44203	1.59353	1.44523	1.85652	1.76964	4.93957	4.82134	4.55756	4.40393	3.19871	6.02254	3.80116	3.71599	4.43339	3.92152	1.09548	1.04673	2.49799	1.28234	1.10559	3.81462	3.54438	2.34048	1.75748	2.5469	4.37825	3.47891	3.08131	3.56367	3.11353	4.48925	5.74814
296	258	4.7	PIP(40:8p)	PIP	C49 H80 O15 N0 P2	PIP(40:8p)-H	C	0.737833	0.552919	0.480233	0.743397	1.20449	1.6204	1.46542	1.37089	1.41987	1.13861	1.07923	1.35257	1.11427	1.33417	1.02535	2.53572	2.55195	2.39858	2.17136	1.59976	2.49274	1.6749	2.06325	1.73663	1.88709	1.08267	1.22783	1.99494	1.30081	1.15396	2.52713	2.32047	1.92516	1.48871	1.78417	2.64797	2.38094	2.27602	2.23685	1.8583	2.47168	2.79972
297	259	6.917	PIP(50:1)	PIP	C59 H114 O16 N0 P2	PIP(50:1)-H	C	0.332745	0.202507	0.275182	0.100088	0.110181	0.967005	0.648705	0.562798	0.584183	0.692572	0.791184	0.528159	0.536631	0.902841	0.713333	0.659493	0.518599	0.495913	0.481512	0.555068	0.752485	0.823233	0.951996	0.646684	0.674555	0.574279	0.74247	0.159907	0.360621	0.386082	0.500409	0.485528	0.808958	0.62943	0.519822	0.664631	0.897914	1.00085	0.781659	0.453386	0.677757	0.666938
298	260	6.608	PIP(50:2)	PIP	C59 H112 O16 N0 P2	PIP(50:2)-H	C	0.276096	0.134531	0.258415	0.11308	0.0676989	0.899584	0.616334	0.447085	0.420333	0.610594	0.573963	0.361071	0.542176	0.825715	0.668661	0.4483	0.312655	0.267627	0.311605	0.436286	0.665261	0.602489	0.849358	0.435671	0.532866	0.774747	0.856987	0.0419367	0.310941	0.235117	0.32311	0.314115	0.89628	0.392143	0.382879	0.859277	1.29499	0.970016	0.640471	0.401859	0.568407	0.43206
299	261	6.924	PIP(52:2)	PIP	C61 H116 O16 N0 P2	PIP(52:2)-H	C	0.618501	0.317469	0.575809	0.319255	0.17853	0.610298	0.581958	0.409729	0.500217	1.1093	0.607897	0.862621	0.527413	1.13304	0.909058	0.638695	0.512545	0.45436	0.438954	0.476018	1.01073	0.932179	1.46191	0.613263	0.554201	1.43222	1.34108	0.348616	0.732864	0.314077	0.740169	0.443903	0.983175	1.68902	0.514551	0.780575	1.70994	1.04821	1.03292	0.682073	1.12686	1.06758
300	262	6.635	PIP(52:3)	PIP	C61 H114 O16 N0 P2	PIP(52:3)-H	C	0.321505	0.242705	0.432863	0.215838	0.133348	0.731708	0.66117	0.582096	0.596641	0.657912	0.876731	0.423298	0.651385	0.899213	0.798309	0.696832	0.582137	0.471863	0.396958	0.198058	0.728461	0.859722	1.03837	0.597181	0.664857	0.868303	1.05148	0.29767	0.599226	0.502461	0.413314	0.609046	1.06711	0.7532	0.581726	0.766272	1.22984	0.916253	0.67699	0.582422	0.780506	0.690973
301	263	6.307	PIP(52:4)	PIP	C61 H112 O16 N0 P2	PIP(52:4)-H	C	0.316288	0.207558	0.287627	0.175231	0.151754	0.582829	0.671553	0.495884	0.452003	0.67313	0.811958	0.54082	0.62476	0.87584	0.76039	0.651668	0.446848	0.417041	0.471941	0.545064	0.645893	0.737858	0.864732	0.50141	0.571329	0.870293	1.00766	0.248281	0.533425	0.488858	0.518122	0.557785	0.983661	0.661966	0.469804	0.72604	1.2184	0.892	0.666162	0.550053	0.817267	0.731647
302	264	6.473	PIP(53:4)	PIP	C62 H114 O16 N0 P2	PIP(53:4)-H	D	0.133163	0.12442	0.158732	0.0833619	0.0220909	0.306318	0.355919	0.262537	0.239043	0.403506	0.230897	0.285135	0.222212	0.496935	0.412805	0.364378	0.57747	0.167568	0.345504	0.221379	0.446465	0.403792	0.55009	0.365002	0.434248	1.50908	1.78366	0.167043	0.828395	0.631506	0.487492	0.650724	0.945668	0.807818	0.612664	0.998453	1.38309	1.21332	0.455597	0.806613	1.18561	0.817121
303	265	6.866	PIP(54:3)	PIP	C63 H118 O16 N0 P2	PIP(54:3)-H	C	0.284596	0.133007	0.297212	0.212229	0.134407	0.390925	0.458128	0.435553	0.387808	0.458541	0.709286	0.592945	0.345825	0.860842	0.599931	0.402383	0.535541	0.466634	0.538649	0.550673	0.439599	1.36271	1.03875	0.380895	0.449973	0.828249	1.03309	0.282511	0.562895	0.234024	0.503809	0.335757	0.961465	0.837527	0.30021	0.541503	0.879913	0.955178	0.589305	0.36503	0.608949	0.617949
304	266	6.637	PIP(54:4)	PIP	C63 H116 O16 N0 P2	PIP(54:4)-H	C	0.265081	0.292564	0.210061	0.223355	0.156458	0.266078	0.251333	0.269524	0.502437	0.589155	0.585142	0.312025	0.487679	0.426486	0.41164	0.462345	0.332342	0.201242	0.338146	0.361104	0.412198	0.66886	1.51562	0.358218	1.01652	1.30149	1.03791	0.316681	0.447062	0.660173	0.88112	0.37313	1.34335	0.957712	0.324095	1.24348	0.77502	1.40005	0.946565	0.80122	0.361374	0.333969
305	267	6.259	PIP(54:5)	PIP	C63 H114 O16 N0 P2	PIP(54:5)-H	C	0.400675	0.278319	0.337899	0.278794	0.142389	0.413076	0.412115	0.318972	0.346454	0.422125	0.787584	0.496347	0.749965	0.633624	0.539376	0.579657	0.509118	0.412397	0.434986	0.391758	0.592399	0.96127	1.05278	0.564428	0.597368	1.36473	2.02045	0.3144	0.706931	0.59181	0.410268	0.528749	0.77438	0.537969	0.416612	0.502713	0.949274	0.664957	0.521121	0.452215	0.531895	0.466789
306	268	5.939	PIP(54:6)	PIP	C63 H112 O16 N0 P2	PIP(54:6)-H	C	0.720895	0.283019	0.669389	0.210301	0.243557	0.390509	0.43133	0.350472	0.380935	0.443146	0.923801	0.525083	0.694534	0.698138	0.579953	0.641551	1.38726	0.374283	0.423781	0.518668	0.671049	2.6123	1.01621	0.492087	0.615592	1.19194	1.41188	0.25839	0.526031	0.605956	0.376869	0.557765	0.704983	0.559138	0.39147	2.00957	1.02488	0.589408	0.543536	0.446822	0.608687	0.534972
307	269	5.738	PIP(54:7)	PIP	C63 H110 O16 N0 P2	PIP(54:7)-H	C	1.55642	0.858793	2.19498	0.3616	0.347034	1.09772	1.132	0.943251	0.729626	0.656056	1.49074	0.933859	1.20485	1.50754	1.188	1.43881	1.25315	1.16104	1.17956	1.14164	1.45525	2.15416	3.0112	1.36885	1.94259	0.0496653	0.0353451	0	0	0	0	0	0.0442969	0	0	0.0798047	0.0842432	0.0706627	0.0215526	0	0.120453	0.0785053
308	270	6.312	PIP(54:7)	PIP	C63 H110 O16 N0 P2	PIP(54:7)-H	C	0.350475	0.221179	0.340414	0.181442	0.115303	0.76508	0.733744	0.619943	0.61551	0.583607	0.864985	0.625067	0.733983	1.08125	0.83136	0.761094	0.674705	0.529488	0.573511	0.550934	0.805742	0.910815	1.09815	0.622395	0.703821	0.910565	1.08812	0.153852	0.492927	0.521742	0.54577	0.622934	1.12179	0.602199	0.556517	0.870003	1.43607	1.08119	0.812277	0.586973	0.914866	0.843328
309	271	5.547	PIP3(33:1)	PIP3	C42 H82 O22 N0 P4	PIP3(33:1)-H	C	6.97017	0.802447	2.67256	2.30609	1.6568	7.25951	2.40024	1.51906	2.69372	0.921196	5.72597	6.93803	7.23774	6.15957	6.08099	8.20924	8.63013	11.3063	7.18243	4.32208	18.8888	11.8856	4.7655	22.9162	16.8452	0.561913	0.299226	1.0182	0.258951	0.220271	4.26898	4.54673	1.64244	0	2.08032	10.0713	3.61832	5.0558	7.236	6.48473	14.614	14.0869
310	272	5.478	PMe(15:0/16:0)	PMe	C35 H69 O8 N0 P1	PMe(15:0/16:0)-H	B	0.968288	0.341351	0.637649	0.283671	0.175864	0.956937	0.608274	0.518856	0.450102	0.461836	0.664717	0.585405	0.555708	0.706726	0.601543	0.707023	0.584268	0.416691	0.539126	0.453004	0.54047	0.594074	0.718152	0.494449	0.491226	2.66206	1.65166	0.322044	0.653824	1.00824	0.594858	0.76734	1.01138	1.51626	0.654765	0.546523	0.808919	0.801368	0.613319	0.750275	0.69501	0.571706
311	273	4.889	PMe(15:0/17:2)	PMe	C36 H67 O8 N0 P1	PMe(15:0/17:2)-H	B	1.49278	0.820045	1.4541	0.804317	0.48207	0.852874	0.603424	0.631913	0.494433	0.494996	0.608107	0.527977	0.544588	0.406921	0.431156	0.269731	0.234694	0.215844	0.217875	0.23669	0.26195	0.327319	0.325018	0.231077	0.238952	3.59119	3.10505	0.869562	1.37445	1.65242	0.601577	0.715877	0.634333	0.798129	0.58814	0.432771	0.554286	0.456421	0.455591	0.568243	0.478397	0.449707
312	274	5.107	PMe(16:0/17:2)	PMe	C37 H69 O8 N0 P1	PMe(16:0/17:2)-H	B	1.43205	1.18468	1.4545	0.967762	0.75076	0.816099	0.800948	0.769354	0.644976	0.77444	1.03256	0.822716	0.893829	0.688275	0.625561	0.401672	0.399647	0.306811	0.37464	0.353216	0.240774	0.393555	0.359676	0.232499	0.23941	1.54276	1.5972	0.632084	0.848304	0.936501	0.502352	0.526838	0.655221	0.716466	0.513457	0.378153	0.509283	0.428582	0.337382	0.424166	0.368925	0.346497
313	275	4.767	PMe(16:0/17:3)	PMe	C37 H67 O8 N0 P1	PMe(16:0/17:3)-H	B	3.9136	1.97926	3.15422	1.54841	1.23862	0.578552	0.42525	0.81879	0.293758	0.352355	1.04107	1.00831	1.27566	0.602431	0.667713	0.216273	0.181034	0.144645	0.169065	0.222365	0.49558	0.422608	0.247691	0.221549	0.277232	2.68304	3.18004	0.400749	1.02426	1.16467	0.550973	0.548618	0.464951	0.620307	0.352593	0.454054	0.545136	0.395979	0.41139	0.368631	0.390227	0.229193
314	276	5.053	PMe(16:0/18:2)	PMe	C38 H71 O8 N0 P1	PMe(16:0/18:2)-H	B	1.27345	0.982752	1.02796	0.806614	0.828859	1.24724	0.986899	1.05515	0.943459	0.803306	1.57979	1.29764	1.6274	1.26771	1.18529	1.66801	1.49854	1.03842	1.29451	1.11896	1.60508	1.86099	1.56462	1.01757	1.24107	2.02916	1.83587	1.15143	1.0762	1.17624	1.65516	1.58918	1.3646	1.47267	1.25213	0.0130016	1.68589	1.6988	0.962772	1.02588	0.0230961	1.36858
315	277	5.271	PMe(17:1/15:0)	PMe	C36 H69 O8 N0 P1	PMe(17:1/15:0)-H	B	0.77045	0.767026	0.8275	0.560464	0.41736	0.815291	0.665308	0.550175	0.504388	0.605716	0.520846	0.501851	0.495898	0.396639	0.328884	0.283813	0.251615	0.185375	0.230956	0.23151	0.244799	0.362848	0.405441	0.258913	0.253458	3.08384	3.2426	1.07502	1.65163	1.86931	0.819081	0.844477	0.975131	1.41802	0.844102	0.513454	0.626334	0.655041	0.585266	0.744425	0.628611	0.559523
316	278	5.497	PMe(17:1/16:0)	PMe	C37 H71 O8 N0 P1	PMe(17:1/16:0)-H	B	0.679394	0.720595	0.667318	0.607007	0.432432	0.684162	0.771329	0.700673	0.630575	0.710513	0.888044	0.708583	0.805096	0.6877	0.623909	0.653553	0.584694	0.486514	0.571706	0.559779	0.434658	0.686488	0.856521	0.412762	0.445464	1.34932	1.48103	0.743976	1.09227	0.968032	0.646745	0.708092	1.02935	1.15939	0.705839	0.610703	0.787413	0.680809	0.538731	0.516633	0.543645	0.446163
317	279	5.752	PMe(17:1/17:0)	PMe	C38 H73 O8 N0 P1	PMe(17:1/17:0)-H	B	0.705239	0.771216	0.778966	0.666791	0.529105	0.614269	0.612702	0.499255	0.41777	0.544503	0.45569	0.423629	0.392453	0.333538	0.31669	0.267116	0.234968	0.117538	0.19721	0.231166	0.175864	0.241936	0.297605	0.158441	0.168928	3.02319	2.81002	1.43993	1.95687	1.92001	0.85923	1.03122	0.81903	1.73327	0.812895	0.53514	0.594559	0.643409	0.508814	0.697417	0.564109	0.520033
318	280	5.362	PMe(17:1/17:1)	PMe	C38 H71 O8 N0 P1	PMe(17:1/17:1)-H	B	1.09041	0.60556	1.12735	0.767897	0.571389	0.615762	0.492823	0.343343	0.28445	0.353187	0.549265	0.476195	0.517305	0.370857	0.363268	0.159876	0.148371	0.11945	0.139396	0.135708	0.122535	0.292045	0.188554	0.142752	0.175841	3.62002	3.31715	1.10597	1.31882	1.94654	0.637951	0.90959	0.894162	1.45442	0.590583	0.622262	0.610678	0.68516	0.672786	0.96411	0.701601	0.545966
319	281	4.917	PMe(17:1/17:2)	PMe	C38 H69 O8 N0 P1	PMe(17:1/17:2)-H	B	1.17541	0.5226	1.2214	0.448801	0.288736	0.76911	0.503484	0.517225	0.321947	0.350089	0.796259	0.787164	0.821611	0.564613	0.470466	0.15967	0.241183	0.0405952	0.198796	0.268654	0.111467	0.301745	0.360498	0.329127	0.357236	4.12374	3.96234	0.657616	1.10196	1.92512	0.468613	0.70134	0.886876	0.684589	0.480148	0.555387	0.685382	0.450774	0.473715	0.665464	0.56461	0.288042
320	282	5.981	PMe(17:1/18:0)	PMe	C39 H75 O8 N0 P1	PMe(17:1/18:0)-H	B	0.682511	0.782381	0.793591	0.686548	0.472836	0.570725	0.642549	0.625523	0.539776	0.722886	0.969396	0.725817	0.928668	0.656962	0.66384	0.667546	0.567251	0.413107	0.507342	0.572662	0.220915	0.436063	0.466145	0.203545	0.251642	1.38309	1.38201	0.528467	0.84475	0.887353	0.733562	0.790125	0.713089	1.64989	0.746053	0.36406	0.48076	0.52335	0.495732	0.629508	0.394603	0.309953
321	283	5.511	PMe(17:1/18:1)	PMe	C39 H73 O8 N0 P1	PMe(17:1/18:1)-H	B	0.61894	0.471503	0.611033	0.437409	0.287147	0.551606	0.43796	0.445127	0.383395	0.460358	1.23079	0.900593	1.45444	0.779346	0.839678	0.499092	0.439441	0.367366	0.417277	0.421106	0.369404	1.15866	0.604127	0.540377	0.698678	2.08382	1.85708	0.411104	0.827564	1.11537	0.723064	0.77329	0.928421	0.96174	0.672156	0.961399	1.06675	0.813954	0.847125	1.1063	0.833823	0.465971
322	284	4.555	PMe(17:2/17:2)	PMe	C38 H67 O8 N0 P1	PMe(17:2/17:2)-H	B	2.14473	0.66434	2.06015	0.53807	0.295942	1.01918	0.633016	0.603279	0.342835	0.471153	1.30276	0.848277	0.941787	0.514153	0.658197	0.202813	0.17744	0.127632	0.134715	0.167567	0.141066	0.29091	0.214435	0.17619	0.192123	4.24612	4.37494	0.675001	1.64337	1.7257	0.416196	0.503508	0.515987	0.658219	0.434419	0.33288	0.451931	0.327361	0.319895	0.459486	0.287283	0.24608
323	285	5.123	PMe(18:1/17:2)	PMe	C39 H71 O8 N0 P1	PMe(18:1/17:2)-H	B	0.800398	0.364299	0.792464	0.352785	0.174791	0.793069	0.509122	0.560019	0.4136	0.520426	1.91139	1.27508	2.00047	1.02422	1.06188	0.347451	0.315949	0.289158	0.27844	0.349028	0.280768	0.970345	0.412418	0.483301	0.549207	2.30952	2.05105	0.423101	0.909173	1.12383	0.495644	0.534724	0.801806	0.589998	0.492606	0.597501	0.701775	0.551915	0.547286	0.657622	0.515935	0.303387
324	286	5.851	PMe(18:1/18:1)	PMe	C40 H75 O8 N0 P1	PMe(18:1/18:1)-H	B	0.530311	0.334667	0.553286	0.365154	0.224224	0.442902	0.502961	0.369388	0.277193	0.401732	0.814084	0.679246	0.875114	0.477752	0.57683	0.366294	0.274464	0.270954	0.27477	0.378284	0.267064	0.958376	0.620181	0.498441	0.659818	3.6622	3.29282	0.669798	1.28316	0.989056	0.765626	0.880801	0.607982	1.34003	0.807326	0.7005	0.466749	0.353628	0.397353	1.05317	0.667366	0.272399
325	287	4.975	PMe(18:1/18:2)	PMe	C40 H73 O8 N0 P1	PMe(18:1/18:2)-H	B	0.18807	0.03212	0.542443	0.0838799	0.00867952	0.137508	0.187497	0.149413	0.094309	0.0910282	0.0884805	0.154163	0.113147	0.303257	0.57355	0.0732801	0.116723	0.0455606	0.0566882	0.0521729	0.0739204	0.133073	0.123382	0.0517594	0.0475542	9.51639	4.43647	0.114316	3.05499	2.50981	1.56065	1.52182	1.7484	0.874835	0.596604	0.698059	0.988621	1.16254	0.738885	0.41079	1.20792	0.528028
326	288	5.371	PMe(18:1/18:2)	PMe	C40 H73 O8 N0 P1	PMe(18:1/18:2)-H	B	1.67591	0.38537	0.799253	0.670155	0.136372	0.319796	1.03682	0.288865	0.318087	0.299187	0.671164	1.16582	1.22408	0.347413	0.480602	0.515384	0.102371	0.0505597	0.138829	0.470978	0.0626112	0.661696	0.184213	0.33143	0.405045	3.54914	2.77079	0.360612	1.17729	1.45381	0.541133	0.464674	0.678343	0.71502	0.504552	0.46419	0.588904	0.459803	0.460306	0.505305	0.418486	0.178199
327	289	4.641	PMe(18:2/13:0)	PMe	C35 H65 O8 N0 P1	PMe(18:2/13:0)-H	B	0.99503	0.760836	1.26905	0.666817	0.415364	0.684679	0.61207	0.584139	0.423844	0.499158	1.13668	0.7395	0.885218	0.737924	0.566028	0.29071	0.240371	0.202242	0.302473	0.259011	0.168473	0.392553	0.323685	0.203477	0.218676	2.72745	2.33318	0.542605	1.08866	1.29564	0.704864	0.749554	0.859441	1.05734	0.655384	0.524405	0.722319	0.661474	0.671858	0.864616	0.664832	0.540046
328	290	4.743	PMe(18:2/17:2)	PMe	C39 H69 O8 N0 P1	PMe(18:2/17:2)-H	B	1.71827	0.54794	1.56598	0.606549	0.253782	1.07525	0.623615	0.741728	0.458651	0.613203	2.0292	1.38575	1.59102	0.900226	1.06337	0.256139	0.233127	0.201164	0.220068	0.261365	0.209549	0.509504	0.30858	0.288937	0.336555	1.99581	1.91706	0.364233	0.783871	1.00728	0.354793	0.367122	0.502497	0.405006	0.346135	0.318101	0.391029	0.315124	0.312264	0.354376	0.309982	0.200244
329	291	4.719	PMe(18:2/18:2)	PMe	C40 H71 O8 N0 P1	PMe(18:2/18:2)-H	B	1.25748	1.11868	1.19041	0.850538	0.954711	1.33278	1.1338	1.02359	0.99918	1.02048	1.3232	1.45318	1.14426	0.939885	0.990036	1.15385	1.1487	1.13834	0.990329	0.933385	1.20543	1.16877	1.00466	0.945783	0.86541	1.39239	1.32407	1.26357	1.192	1.01835	1.29269	1.1646	1.14134	1.11285	0.982044	0.0182884	1.09612	1.11056	1.05447	0.901438	0.0502231	1.24889
330	292	4.449	PMe(18:3/17:2)	PMe	C39 H67 O8 N0 P1	PMe(18:3/17:2)-H	B	4.20285	1.39856	3.62012	1.04188	0.581115	0.895967	0.700047	0.572269	0.392361	0.552634	0.971074	0.903854	0.978528	0.507411	0.561681	0.290423	0.280897	0.189491	0.263303	0.263223	0.236372	0.383675	0.420176	0.24879	0.232654	0.13742	0.131502	0.0793283	0.0836016	0.107761	0.0712015	0.0801739	0.0749649	0.0879246	0.0712248	0.0155997	0.0713455	0.0812272	0.0687637	0.0654118	0.0199935	0.0803701
331	293	4.15	PMe(18:3/17:3)	PMe	C39 H65 O8 N0 P1	PMe(18:3/17:3)-H	B	6.00822	1.55516	3.50374	1.00526	0.70198	0.655727	0.731889	0.461459	0.343873	0.416807	0.614101	0.674892	0.719204	0.37364	0.445562	0.309005	0.294279	0.28193	0.292837	0.271482	0.309258	0.341832	0.418463	0.253111	0.323874	0.194164	0.165986	0.141309	0.143542	0.121135	0.180856	0.15068	0.170485	0.151182	0.135957	0	0.164953	0.154283	0.132996	0.11219	0.00120107	0.14561
332	294	4.414	PMe(18:3/18:2)	PMe	C40 H69 O8 N0 P1	PMe(18:3/18:2)-H	B	1.38898	1.43342	1.38771	1.22877	1.27004	1.31505	1.25643	1.19884	1.0042	0.939842	1.3143	1.20679	1.06928	1.06278	0.974233	1.24162	1.07355	1.09042	1.0464	0.977832	1.42775	1.16022	1.09705	1.04945	0.915534	1.25391	1.20099	1.18032	1.04015	0.996831	1.106	1.22857	1.15886	1.03578	0.93619	0	1.18642	1.15055	1.00602	0.956766	0	1.08032
333	295	5.573	PMe(20:1/17:2)	PMe	C41 H75 O8 N0 P1	PMe(20:1/17:2)-H	B	2.46416	0.681606	1.54189	0.585799	0.281657	0.920751	0.506754	0.536605	0.439063	0.539474	1.77547	1.24872	1.32814	0.905182	0.982421	0.345098	0.248294	0.224477	0.311416	0.275776	0.232326	0.459448	0.322513	0.256261	0.392421	3.41248	2.16541	0.374208	0.826888	1.14732	0.485536	0.526624	0.635043	0.501777	0.436676	0.468833	0.537223	0.461665	0.380575	0.472655	0.400633	0.260404
334	296	4.592	PS(15:0/18:2)	PS	C39 H72 O10 N1 P1	PS(15:0/18:2)-H	A	0.618215	1.2874	0.706453	0.883586	0.856611	0.660549	1.3485	1.01157	0.915313	0.948206	0.404566	0.310502	0.266763	0.378626	0.265917	0.278078	0.265368	0.25717	0.212126	0.341394	0.217726	0.220884	0.363019	0.136267	0.199629	0.487121	0.8445	1.31927	1.52428	1.1234	0.568756	0.57308	0.923786	0.951935	0.760151	0.435498	0.55028	0.773572	0.497674	0.42482	0.336219	0.442677
335	297	5.152	PS(16:0/16:0)	PS	C38 H74 O10 N1 P1	PS(16:0/16:0)-H	A	0.713126	0.12179	0.404702	0.119695	0.0837187	1.37905	0.913709	0.638371	0.795394	0.574822	0.876745	0.667694	0.695962	1.13024	0.911375	0.970111	0.778822	0.667152	0.639262	0.592806	1.17089	1.18167	1.21948	0.829587	0.965148	1.39665	1.23097	0.202832	0.46341	0.578724	0.699959	0.646326	0.973474	0.594666	0.720232	0.852918	0.972794	1.00377	0.673633	0.486804	0.802385	0.813986
336	298	4.714	PS(16:0/16:1)	PS	C38 H72 O10 N1 P1	PS(16:0/16:1)-H	A	0.334396	0.548584	0.330168	0.426355	0.47058	0.405694	0.876289	0.654197	0.663868	0.60207	0.515138	0.456232	0.492164	0.443919	0.387212	0.583196	0.538653	0.560347	0.670445	0.811827	0.293363	0.656734	0.872144	0.26928	0.312019	0.524327	0.731985	1.57684	1.61954	0.981876	1.45165	1.38659	1.62125	2.24914	1.38979	0.951048	1.15258	1.4573	1.4269	0.709453	0.906447	0.869181
337	299	5.181	PS(16:0/18:1)	PS	C40 H76 O10 N1 P1	PS(16:0/18:1)-H	A	0.324951	0.465372	0.320998	0.405681	0.358503	0.604463	1.17044	0.91345	1.0252	0.838163	0.833095	0.624601	0.717152	0.76167	0.630624	1.08718	0.911868	0.921911	1.01503	1.0288	0.612298	1.04128	1.66456	0.578571	0.699171	0.44691	0.699213	0.816554	0.907113	0.748236	1.04232	1.05635	1.42506	1.26377	1.09204	0.976504	1.23043	1.25003	0.929606	0.670933	0.746723	0.783677
338	300	4.81	PS(16:0/18:2)	PS	C40 H74 O10 N1 P1	PS(16:0/18:2)-H	A	0.685856	1.01379	0.723587	0.907844	0.814045	0.705953	1.38129	1.16633	1.02809	0.965764	0.82469	0.69207	0.667626	0.644588	0.5464	0.524025	0.578669	0.500455	0.555084	0.690749	0.293792	0.482539	0.659282	0.271128	0.288481	0.43057	0.590214	0.863119	0.932425	0.656119	0.760273	0.62863	1.04992	0.898254	0.686466	0.711332	0.781132	0.846134	0.718348	0.474747	0.527977	0.492824
339	301	4.495	PS(16:0/18:3)	PS	C40 H72 O10 N1 P1	PS(16:0/18:3)-H	A	1.25924	2.34898	1.58782	1.97736	1.93321	0.55568	1.28966	0.964792	0.732326	0.791706	0.537124	0.508284	0.458924	0.452099	0.39578	0.348009	0.335969	0.313278	0.39818	0.522013	0.232761	0.389258	0.594525	0.182888	0.217943	0.151043	0.229224	0.411416	0.471137	0.355674	0.303311	0.301692	0.410044	0.465658	0.356115	0.21969	0.154859	0.215863	0.215279	0.125382	0.0737611	0.0820851
340	302	4.808	PS(16:0/20:5)	PS	C42 H72 O10 N1 P1	PS(16:0/20:5)-H	B	0.999661	1.10897	0.947025	0.958867	0.893857	1.21676	1.49297	1.2799	1.25744	0.856508	1.29086	1.2166	1.19881	1.16388	0.964594	1.39663	1.4491	1.3924	1.51816	1.20368	1.22246	1.3502	1.76012	1.06987	0.979392	0.727307	1.01496	1.23198	0.98549	0.88523	1.45793	1.32642	1.49012	1.17546	1.16471	1.6073	1.62551	1.74339	1.60152	1.21113	1.62844	1.54876
341	303	5.434	PS(17:0/18:1)	PS	C41 H78 O10 N1 P1	PS(17:0/18:1)-H	A	0.427769	0.630784	0.449244	0.600419	0.572913	0.381795	0.87507	0.70017	0.534575	0.579366	0.380809	0.273982	0.327942	0.270178	0.237819	0.335007	0.274669	0.258119	0.335455	0.338569	0.167589	0.30914	0.536042	0.215688	0.195854	0.786239	1.44993	1.94966	1.94857	1.65845	1.27402	1.4783	1.2744	2.12791	1.29321	0.781692	0.904582	1.19984	1.0282	0.83803	0.669474	0.830716
342	304	5.039	PS(17:0/18:2)	PS	C41 H76 O10 N1 P1	PS(17:0/18:2)-H	A	0.611988	0.86237	0.704609	0.796646	0.729147	0.405899	0.833751	0.642659	0.522506	0.553694	0.363665	0.274275	0.244906	0.267111	0.220856	0.200062	0.190784	0.136559	0.218466	0.26007	0.0873893	0.192567	0.335724	0.0747128	0.0992971	0.685781	1.20009	1.43293	1.45272	1.37829	0.880105	1.07044	1.0356	1.80757	0.967741	0.549437	0.673108	0.944432	0.691216	0.546086	0.440362	0.433681
343	305	4.69	PS(17:1/18:2)	PS	C41 H74 O10 N1 P1	PS(17:1/18:2)-H	A	0.920926	1.57151	0.970276	1.21585	1.21454	0.703017	1.22032	1.05542	0.957644	0.98091	0.572441	0.460125	0.402485	0.426131	0.404528	0.279222	0.28056	0.225107	0.363063	0.477254	0.112485	0.214099	0.389318	0.136805	0.141737	0.707349	1.0785	0.799906	2.24113	1.39872	0.354283	0.455254	0.674833	0.673577	1.22072	0.797057	0.367541	0.418076	0.304709	0.499486	0.220285	0.248832
344	306	5.65	PS(18:0/18:1)	PS	C42 H80 O10 N1 P1	PS(18:0/18:1)-H	A	0.53758	0.668284	0.528886	0.676221	0.551999	0.682273	1.28925	1.13283	0.986072	0.966434	0.790522	0.663392	0.781529	0.747322	0.681577	1.15333	1.00897	1.05632	1.12774	1.14199	0.358231	0.667992	1.06725	0.335929	0.410099	0.239884	0.514871	0.601342	0.615136	0.51345	0.673311	0.809591	0.669835	1.40098	0.760266	0.372754	0.537474	0.69902	0.692948	0.600965	0.411613	0.454951
345	307	5.286	PS(18:1/18:1)	PS	C42 H78 O10 N1 P1	PS(18:1/18:1)-H	A	0.940296	0.959683	0.124764	1.24811	1.00273	0.505173	1.53092	1.21539	0.765251	1.07388	0.596029	0.482863	0.448842	0.477629	0.423179	0.508556	0.507413	0.423989	0.568321	0.653885	0.163314	0.364729	0.426742	0.145046	0.194327	0.21475	0.383084	0.689123	0.561468	0.412303	0.563386	0.605031	0.575766	1.71313	0.619998	0.338217	0.441724	0.664702	0.575307	0.484231	0.346802	0.360172
346	308	4.834	PS(18:1/18:2)	PS	C42 H76 O10 N1 P1	PS(18:1/18:2)-H	A	0.819454	1.07108	0.762008	1.08295	0.93324	0.615545	1.1846	1.00028	0.89768	0.937633	0.558113	0.499589	0.443373	0.556867	0.438693	0.515604	0.493571	0.487251	0.625556	0.695544	0.209092	0.431626	0.660817	0.17118	0.235355	0.34046	0.447186	0.751959	0.683787	0.574958	0.51524	0.538151	0.736392	0.853829	0.586606	0.431008	0.556139	0.783268	0.509129	0.423767	0.352201	0.418958
347	309	4.484	PS(18:2/18:2)	PS	C42 H74 O10 N1 P1	PS(18:2/18:2)-H	A	1.29103	1.89134	1.13436	1.8167	1.5035	0.542988	1.29024	0.982171	0.843987	0.922453	0.473834	0.368832	0.29827	0.334162	0.280285	0.194926	0.20249	0.177868	0.246251	0.332923	0.0857006	0.142047	0.212213	0.07053	0.0889593	0.260163	0.401407	0.612824	0.788117	0.475585	0.266501	0.297882	0.392049	0.549437	0.321443	0.195007	0.278823	0.360747	0.265909	0.172797	0.149471	0.154658
348	310	4.186	PS(18:3/18:2)	PS	C42 H72 O10 N1 P1	PS(18:3/18:2)-H	A	1.52123	2.9544	1.58344	2.46463	2.49385	0.352048	0.905284	0.696272	0.423921	0.564708	0.246368	0.250766	0.233507	0.202583	0.190328	0.122323	0.119664	0.119169	0.15752	0.214505	0.0547532	0.0969788	0.133036	0.0481086	0.059654	0.0150861	0.0229074	0.0343287	0.0420523	0.0250514	0.0257278	0.0220658	0.0375474	0.042101	0.027262	0.0186629	0.0299372	0.0441707	0.0230802	0.0156664	0.0125735	0.016483
349	311	4.404	PS(19:3/18:2)	PS	C43 H74 O10 N1 P1	PS(19:3/18:2)-H	A	1.25591	2.62541	1.63096	1.93051	2.1632	0.472311	0.998581	0.949114	0.535357	0.759137	0.304242	0.283768	0.323705	0.183827	0.238786	0.116084	0.399823	0.380826	0.399723	0.208038	0.33238	0.532345	0.662975	0.0620419	0.013579	0.00702854	0.895314	0.611261	0.00986986	0.658367	0.610577	0.615885	0.742868	0.0102079	0.589724	0.584382	0.798056	0.625483	0.48344	0.331546	0.486948	0.314115
350	312	4.947	SQDG(16:0/16:0)	SQDG	C41 H78 O12 S1	SQDG(16:0/16:0)-H	A	1.4128	1.18752	1.06105	0.936892	0.974484	1.70781	1.16621	1.09525	1.08407	0.796829	1.33418	1.32911	1.32867	1.35138	1.17435	1.76703	1.36902	1.43248	1.39057	1.01346	1.82584	1.62684	1.64886	1.5057	1.33214	1.51476	1.5818	1.35947	1.04249	1.11775	1.70054	1.57283	1.56782	1.30295	1.15974	0	1.7101	1.64435	1.63495	1.36014	0	1.87226
351	313	4.345	SQDG(16:0/18:3)	SQDG	C43 H76 O12 S1	SQDG(16:0/18:3)-H	A	1.50661	1.30185	1.25186	1.10511	1.00859	1.48334	1.46875	1.21748	1.08066	1.01374	1.46989	1.40992	1.33063	1.19039	1.06583	1.47158	1.45623	1.37561	1.23793	1.06209	1.48163	1.32507	1.34947	1.24972	1.07112	1.5064	1.3924	1.33195	1.22862	1.08081	1.4716	1.45291	1.39634	1.24391	1.19037	0	1.49909	1.37313	1.30589	1.17852	0	1.54203
352	314	4.323	SQDG(18:2/18:2)	SQDG	C45 H78 O12 S1	SQDG(18:2/18:2)-H	B	1.28765	1.34417	1.53866	1.11482	0.964287	1.52341	1.33436	1.34804	1.01808	1.22225	1.36198	1.21067	1.13546	1.18116	1.06644	1.22508	1.35358	1.27603	1.22579	1.15332	1.62717	1.60319	1.37486	1.11135	1.15811	1.58484	1.41767	1.21701	0.912501	0.952054	1.50206	1.56097	1.52567	1.14094	1.18618	0	1.34662	1.19013	1.19463	1.23835	0	1.53033
353	315	4.714	SQDG(40:12)	SQDG	C49 H70 O12 S1	SQDG(40:12)+HCOO	D	3.02826	0	5.98018	0	0	1.53019	0	0	0	0	0	0	2.28459	11.2791	10.2751	8.68192	6.23361	4.14157	3.45449	0	22.9536	11.8215	3.9847	15.3446	13.1524	57.2323	12.8065	0	4.65559	10.1161	9.69656	11.6066	4.65484	0	7.36264	14.69	4.83942	8.90636	9.37158	13.0254	42.4918	28.3649
354	316	2.596	SQDG(44:4)	SQDG	C53 H94 O12 S1	SQDG(44:4)+HCOO	D	0.320836	0.511247	0.515397	0.375433	0.237121	0.0862271	0.484743	0.541821	0.332341	0.548177	0.571672	0.394977	0.737849	0.47856	0.400019	0.68758	0.290277	0.517344	0.57506	0.66861	0.1374	1.11611	2.61484	0.163667	0.30768	0.711985	0.934919	0.190422	0.485229	0.681048	0.189093	0.111044	0.346539	0.713596	0.185631	0.395831	0.290713	0.630535	0.198682	0.298297	0.137117	0.0497239
[truncated: 8 more columns]
