# Supplementary material for: Integrated metabolomics and lipidomics analyses suggest the temperature-dependent lipid desaturation promotes aflatoxin biosynthesis in Aspergillus flavus
Source: Front Microbiol. 2023 Mar 31;14:1137643. doi: 10.3389/fmicb.2023.1137643 (PMC10102665; doi:10.3389/fmicb.2023.1137643)
Supplement: Supplementary file 5 [file Table_5.xlsx]

## Sheet: Supplementary Table S5
Supplementary Table S5 The peak information for fatty acids in mycelia samples detected by GC-MS.
1
2	Experiment title:		The peak information for fatty acid in mycelia samples detected by GC-MS.
3	Plant species:		Aspergillus flavus
4	Organ/tissue:		mycelia
5	Analytical tool:		GC-MS
6
7	Peak no.- number referenced back to the main text
8	RT- Retention time
9	Corresponding metabolite name in literature
10	Molecular formula of the metabolite
11	Qualitative ion
12	1, 2- different isomers
13	Identification level (A; B; C; D)- (A) standard or NMR; (B) MS/MS; (C) MSE; (D) MS only
14	Peak No.	RT (min)	Corresponding metabolite name in literature	Molecular formula	Qualitative ion	Identification level (A-D)	28-2D-1	28-2D-2	28-2D-3	28-2D-4	28-2D-5	28-3D-1	28-3D-2	28-3D-3	28-3D-4	28-3D-5	28-4D-1	28-4D-2	28-4D-3	28-4D-4	28-4D-5	28-5D-1	28-5D-2	28-5D-3	28-5D-4	28-5D-5	28-6D-1	28-6D-2	28-6D-3	28-6D-4	28-6D-5	37-2D-1	37-2D-2	37-2D-3	37-2D-4	37-2D-5	37-3D-1	37-3D-2	37-3D-3	37-3D-4	37-3D-5	37-4D-1	37-4D-2	37-4D-3	37-4D-4	37-4D-5	37-5D-1	37-5D-2	37-5D-3
15	1	7.503	2-Heptanol, tert-butyldimethylsilyl ether	C13H30OSi	75	D	0.940017	0.908047	0.873802	0.7808	0.663249	0.983364	0.67688	0.763477	0.629215	0.675816	0.979505	0.773455	0.622724	0.613768	0.602023	0.958626	1.10693	0.763721	0.669351	0.771866	0.986407	1.27349	0.894849	1.18955	0.710764	0.90902	0.814305	0.809873	0.730043	0.601953	0.917236	0.821985	0.667314	0.652715	0.535132	0.838632	0.917744	1.34011	0.75757	0.865122	0.868116	1.39353	0.72493
16	2	17.363	1-Hepten-4-ol, 4-propyl-	C10H20O	115	D	0.88575	1.72661	1.03556	1.18689	1.14174	0.837074	0.845397	1.05322	1.00303	1.0913	0.876671	0.923077	0.814628	1.02371	1.06683	0.932913	2.42951	0.906431	0.861034	1.24842	0.895839	1.84918	0.947289	2.10794	1.02144	0.908449	1.0058	1.10946	1.1483	1.11602	0.898613	0.925095	0.976545	0.94401	0.964691	0.861791	1.44741	2.9942	0.921564	1.3947	0.916267	3.08953	0.869609
17	3	18.14	Methyl laurate(C12:0)	C13H26O2	143	A	0.80025	0.851829	0	0.34542	0.442326	0.0765864	0.143795	0	0.0765864	0.678337	0.412629	0.40794	0.296968	0.928415	0.257893	0.822132	2.01157	0.804939	0.382932	1.11128	0.451704	1.6724	1.0644	3.44952	1.28321	0.540794	0.873711	0.428259	0.262582	0.553298	1.3473	1.18943	0	1.18162	1.48328	1.86152	2.64145	6.55986	1.05033	1.38168	0.531416	3.598	1.30041
18	4	18.266	Methyl 6-methyloctanoate	C10H20O2	75	D	0.946644	1.19	0.664085	0.857238	1.12067	0.486231	0.708548	1.09772	0.674125	0.764965	0.741538	0.818034	0.998757	0.866322	0.970071	0.938994	1.70157	1.02553	1.13167	0.781698	0.917479	1.30905	0.917001	1.56531	1.04609	1.02553	0.9476	0.562249	0.694683	0.963855	1.24068	0.679862	0.426946	1.01501	1.08051	0.703289	1.05613	2.0372	0.815644	0.996845	0.825206	1.81392	0.662651
19	5	21.138	Methyl tridecanoate(C13:0)	C14H28O2	185	A	0.742825	2.32736	0.521746	1.61428	2.17059	0.243589	0.643942	0.86261	0.452609	0.900394	0.859394	0.388295	0.627864	0.33202	0.266902	0.319961	1.28145	0.622237	0.502452	1.19383	0.644746	2.21481	0.798296	2.20516	0.716296	0.773374	0.601335	1.10218	1.93263	2.30485	1.18418	0.982394	0.681727	1.07243	0.771766	0.340863	0.664844	2.15451	0.687354	0.897178	0.51853	2.12879	0.114961
20	6	23.825	Methyl myristate(C14:0)	C15H30O2	199	A	0.117919	0.294131	0.0314028	0.169283	0.224333	0.19827	0.160574	0.0600085	0.167248	0.815073	0.71953	0.461061	0.518018	1.13508	0.484009	0.663018	1.85359	0.860525	0.666768	1.32775	0.888558	1.98696	1.77693	3.92248	1.59722	0.563152	0.892118	0.670328	0.624241	0.713046	1.30849	1.61101	0.612227	1.25446	1.59938	1.38916	2.10106	4.74582	1.3624	2.04811	1.05835	3.67374	1.49424
21	7	23.927	Methyl myristoleate (C14:1)	C15H28O2	166	A	0	3.2373	0	0.992418	0.833207	0	0.265353	5.32297	0	0.493556	0.297195	0	0.705838	1.23654	0	0.238817	2.51024	0.642153	0.281274	0.870356	0.785444	2.81274	1.279	3.17362	0.509477	0.742987	0.769522	0.976497	1.36922	3.03563	0	1.9583	0.222896	1.66111	0.302502	0.769522	1.67703	5.58832	0.382108	1.40637	0.238817	4.75512	0.419257
22	8	26.469	Methyl pentadecanoate(C15:0)	C16H32O2	143	A	0.28131	0.695243	0.0631581	0.38904	0.529149	0.225553	0.225553	0.0642514	0.195109	1.16838	0.633935	0.436304	0.542016	0.806926	0.537138	0.482053	1.56154	0.652521	0.563545	0.964779	0.59996	1.59678	1.0948	2.85843	1.00708	1.14433	1.74093	1.61083	1.57441	1.29882	1.40562	1.72268	0.625105	1.83503	1.60612	1.13415	1.85698	4.68286	1.25114	1.94402	0.950146	4.38137	1.05098
23	9	26.59	Ethyl hydrogen sebacate	C12H22O4	98	D	0.69027	2.14091	0.193656	0.894618	1.41381	0.141381	0.0712843	2.23001	0.361174	0.768682	0.345729	0.216229	0.500178	0.888678	0.4681	0.525128	2.28823	0.450279	0.378995	0.748485	0.990852	2.20981	0.970655	2.5995	0.994416	0.860164	0.88749	1.43519	1.3746	1.60033	1.03481	1.48747	0.583343	1.37579	1.07045	1.09778	1.74765	3.54758	0.784127	1.71558	0.719971	4.41606	0.904123
24	10	28.876	Methyl palmitoleate (C16:1)	C17H32O2	152	A	0	0	0	0	0	0	0	0	0	1.08298	0.546197	0.178926	0.257403	2.3951	0.269959	0.953228	4.44596	1.22528	0.975201	2.3951	1.00555	3.69154	7.562	18.8595	6.38694	0.050225	0.719891	0.214502	0.107774	0.226012	0.885215	2.1241	0.0460396	1.16982	1.7924	1.00031	2.02051	6.72177	1.17924	1.535	0.567124	4.23459	1.45862
25	11	29.029	Methyl palmitate(C16:0)	C17H34O2	227	A	0.281748	0.51965	0.0984783	0.342922	0.440497	0.446498	0.372917	0.176931	0.365599	1.17309	1.03956	0.701965	0.851374	1.45744	0.723152	0.931562	1.92578	1.17316	0.90024	1.49724	1.11692	1.99444	1.9164	3.45659	1.82238	0.753659	1.0977	0.8662	0.749533	0.790491	1.31427	1.70609	0.679157	1.18906	1.4396	1.21846	1.67899	3.60121	1.20777	1.65336	0.937469	2.55306	1.20327
26	12	31.236	cis-10-Heptadecanoic acid methyl ester (C17:1)	C18H34O2	250	A	0	0	0	0	0	0	0	0	0	0.820759	0.0983082	0	0	1.24371	0.114312	0	2.60174	0.640146	0.107453	0.953361	0.617284	1.83128	3.1893	11.5729	2.38683	0.489255	1.70325	0.761317	0.482396	0.612711	2.36854	6.12711	0.118884	3.13443	4.6845	2.49657	4.79652	15.064	2.83722	4.89255	1.18656	10.3498	2.1262
27	13	31.417	Methyl heptadecanoate(C17:0)	C18H36O2	241	A	0.149333	0.384036	0.0240623	0.201246	0.302332	0.124747	0.151044	0.0314136	0.0995144	0.565603	0.465774	0.388698	0.463679	0.573059	0.401183	0.37878	0.989364	0.530976	0.43443	0.676991	0.503561	1.03941	0.81913	1.68818	0.703306	1.23711	1.73861	1.54683	1.40441	1.24579	2.44834	2.65584	1.35445	2.55589	2.52168	2.35321	3.41623	6.93082	2.08769	2.97176	1.55675	4.81811	1.68357
28	14	32.781	Cyclohexane, 2-ethyl-1,3-dimethyl-	C10H20	201	D	0.14991	0.387247	0.0244702	0.225934	0.300057	0.330467	0.21453	0.0677088	0.275824	1.27103	1.07051	0.53977	0.756676	1.96736	0.664022	0.81108	3.31607	0.971681	0.889955	1.88064	1.31545	3.94232	2.18284	6.33184	1.95857	0.826998	1.52761	1.12373	0.877601	0.976908	1.33184	2.4646	0.567329	1.10639	1.33636	0.979996	1.82766	5.89209	1.15319	2.01226	0.760952	4.39205	1.33422
29	15	32.847	Decanal dimethyl acetal	C14H30O2	129	D	0.160702	0.413804	0.0475316	0.188529	0.299835	0.353358	0.204106	0.114369	0.264819	1.33088	1.19335	0.516856	0.753315	1.84401	0.714172	0.940113	3.17396	0.99337	0.985248	1.93641	1.34912	3.64835	2.17141	5.91548	2.15357	0.953294	1.71473	1.03704	0.964744	1.14369	1.36377	2.47191	0.521249	1.16073	1.44326	1.06101	1.76386	4.94115	1.19015	1.9934	0.785669	4.17066	1.21359
30	16	33.107	9-Nonadecyne	C19H36	294	D	0	1.54759	0	0.266996	0.212608	0.509271	0	0	0	3.19901	1.47837	0	0.8356	2.90729	1.34981	0	5.04821	0.959209	0.242274	3.46601	1.82447	8.54388	0.736712	4.86032	1.77998	0.479604	3.23857	1.69098	1.41409	1.04326	0.529048	3.8665	0	0.504326	0.716934	0	1.04821	5.24598	0.232386	0.415328	0	5.92336	0.212608
31	17	33.312	Methyl 2-octylcyclopropene-1-heptanoate	C19H34O2	294	D	0.389931	2.28003	0	0.538263	0.99337	0.661872	0.389931	0	0.180919	2.06203	1.42488	0.879874	0.897854	1.90696	1.16867	0.803461	3.34757	0.874256	1.04506	1.88223	1.79121	5.20508	0.977638	3.12957	0.933813	1.08552	1.74177	1.8429	1.80133	1.0327	0.587706	2.12046	0.497809	1.2271	0.823688	0.34723	0.946174	3.17451	0.767502	1.50242	0.265198	3.45657	0.814698
32	18	33.545	trans-9-Elaidic acid methyl ester (C18:1)	C19H36O2	264	A	0.0918662	0.187395	0.00963826	0.113405	0.150618	0.169402	0.182033	0.0439251	0.163524	1.19065	1.11015	0.575365	0.815042	1.87445	0.60341	1.1486	2.44704	2.11963	1.00382	1.99432	1.44576	2.65283	3.99741	7.44597	3.41036	0.334695	0.747205	0.384041	0.289773	0.350117	1.21524	2.07682	0.328534	0.911403	1.49468	1.13606	1.59436	3.33453	1.14665	1.60537	0.854257	2.53315	1.48868
33	19	33.694	9-Octadecenoic acid (Z)-, methyl ester 2	C19H36O2	264	D	0.255815	0.510705	0.0756337	0.31881	0.428457	0.449946	0.4113	0.137658	0.358892	1.27147	1.27527	0.861958	1.02778	1.68757	0.894817	1.14384	2.42765	1.67001	1.09555	1.51113	1.38689	2.58126	2.05059	3.79668	1.7625	0.670181	1.0128	0.743243	0.609424	0.69433	1.20698	1.82185	0.652715	0.980966	1.22275	1.0929	1.54543	3.03628	0.985554	1.54824	0.957797	2.68278	1.32105
34	20	33.764	Methyl stearate (C18:0)	C19H38O2	298	A	0.224319	0.394874	0.068349	0.253156	0.33226	0.3553	0.349112	0.121868	0.259478	0.971755	0.994222	0.716805	0.852644	1.25293	0.675427	0.891996	1.91758	1.70765	0.94901	1.49106	1.16923	2.14706	2.25379	3.80262	1.85499	0.542655	0.719653	0.576775	0.533282	0.501375	1.34152	1.82977	0.792378	1.26468	1.40357	1.47551	2.1258	4.27385	1.49675	2.19039	1.24651	3.83452	1.32854
35	21	33.954	9,12-Octadecadienoic acid, methyl ester	C19H34O2	294	D	0.497302	0.798627	0.0102777	0.747004	0.661279	0.576254	0.730186	0.0733456	0.424891	1.5781	1.48046	0.94088	1.13522	1.94156	0.958866	1.13359	2.59373	1.81916	1.1142	1.97636	1.21838	2.25199	2.53066	4.21761	2.07447	0.903039	1.10976	0.757048	0.772231	0.639789	1.01189	1.84065	0.590269	0.880381	1.09948	0.907711	1.0488	2.43325	0.872906	1.33704	0.784611	2.28586	0.808203
36	22	34.103	Methyl linolelaidate (C18:2)	C19H34O2	294	A	0.694169	1.26667	0.126655	0.698667	1.03998	0.758834	0.566178	0.204811	0.561802	1.66729	1.39818	1.2725	1.1862	1.75262	1.01348	0.9978	2.31661	1.34154	1.06976	1.70121	1.47196	2.53419	1.76891	3.06159	1.233	1.01518	1.19155	1.17526	1.06259	0.803564	1.06088	1.69404	0.504309	0.801497	0.828117	0.652478	0.996098	2.03389	0.701584	1.28113	0.591946	2.30993	0.632422
37	23	34.201	Methyl linoleate (C18:2)	C19H34O2	292	A	0.66441	2.44829	0	1.1646	1.60963	0	0.658142	0	0.211859	4.03661	2.14116	1.75505	2.27278	4.73862	1.7563	2.14868	5.12097	5.99097	1.94183	4.10806	1.92178	3.91501	7.2872	18.7	5.69512	0	0	0	0	0	0	0	0	0	0	0	0	0	0	0	0	0.117839	0
38	24	35.942	Nonadecanoic acid, methyl ester	C20H40O2	312	D	0	0.0804136	0	0	0.031591	0	0	0	0	0.292217	0.468122	0.114159	0.308013	0.466686	0.155083	0.361861	1.10066	0.628949	0.201752	0.626077	0.633975	1.59894	1.97013	3.94673	0.779006	1.06045	1.90336	1.68868	1.49627	0.924038	3.08731	3.89072	1.23492	3.04997	2.60985	2.94586	4.61732	10.774	2.70175	5.77685	1.5537	10.3016	1.96152
39	25	35.998	1,E-8,Z-10-Hexadecatriene	C16H28	294	D	0.268378	1.32555	0	0.487281	0.671645	0.26231	0.207235	0	0.147025	2.09288	1.50805	0.818203	1.28681	2.2049	0.891015	0.923687	3.5706	1.172	1.31389	2.23151	1.74469	3.07398	2.52042	5.63127	2.08588	1.06231	1.39463	1.4273	1.2098	1.04317	1.1846	1.95613	0.34119	1.25881	1.12439	0.732322	1.54166	3.1944	0.960093	2.05554	0.576896	3.72555	0.849942
40	26	36.18	9,12-Octadecadienoic acid (Z,Z)-, methyl ester 1	C19H34O2	294	D	0.278866	0.152587	0	0.453815	0	0.798451	0	0.0436714	0.419614	1.66846	0.502485	0.786875	0.868167	3.31087	0.732681	1.08363	2.23329	1.62137	1.30751	3.60921	0	2.36247	2.46612	0.240193	1.42143	0	0	1.02996	0.993131	0.816077	1.51403	2.17778	0	0.985764	0	0.587986	1.41958	2.56399	0.675592	1.06311	0.722157	5.50576	1.10362
41	27	36.18	Methyl 6,11-octadecadienoate	C19H34O2	294	D	0.407153	0.904443	0.0144629	0.533959	0.928109	0.472016	0.39342	0.0392982	0.31497	1.75396	1.58449	0.889541	1.37018	1.81181	0.986399	1.19984	2.64992	1.29611	1.2628	1.84964	1.51875	3.47898	2.71479	5.59495	1.86469	1.03286	1.61663	1.27872	1.1769	0.967992	1.17588	2.08923	0.520957	1.03417	0.965508	0.771501	1.28778	2.90003	0.935414	1.97674	0.702839	4.23383	0.8967
42	28	36.44	Cyclopropane, (2,2-dimethylpropylidene)-	C8H14	227	D	0.673321	1.48853	0.0750894	0.700238	1.1174	0.83229	0.530145	0.0711661	0.354291	1.72134	1.58815	1.07231	1.22825	1.654	0.969557	1.01222	2.29847	0.870083	1.13016	1.92893	1.79355	3.59004	1.63036	3.22482	1.20515	1.18911	1.36745	1.44994	1.0816	1.06173	0.900377	1.70371	0.523937	0.912396	0.698351	0.676847	1.00566	2.34108	0.838151	1.48446	0.658721	3.09679	0.644517
43	29	36.534	2-Fluorobenziic acid, cyclohexyl ester	C13H15FO2	241	D	0.712859	1.4377	0.104788	0.752994	1.10391	0.876443	0.562532	0.0878985	0.418199	1.7202	1.53205	1.14236	1.18545	1.55398	0.999664	0.961163	2.16382	0.855648	1.12479	1.79529	1.77191	3.16185	1.59879	3.10732	1.16525	1.19244	1.32724	1.41882	1.1692	1.04357	0.914036	1.63843	0.544371	0.857555	0.737149	0.689204	0.989539	2.16704	0.846114	1.52347	0.663552	2.88626	0.679443
44	30	36.762	5-Hepten-2-ol, 6-methyl-	C8H16O	155	D	0.675821	1.65327	0.109625	0.766691	1.24584	0.835057	0.469823	0.103672	0.400949	1.75507	1.57142	1.17517	1.20941	1.44087	0.968004	0.962833	2.49705	0.894895	1.12599	1.9405	1.80189	3.64576	1.46755	2.76439	1.20993	1.18924	1.34774	1.41527	1.27951	1.00405	0.861619	1.46281	0.400949	0.869777	0.700646	0.638369	0.941247	2.43682	0.824128	1.29688	0.58501	2.54743	0.639755
45	31	36.836	1,1-Cyclohexane diacetic acid	C10H16O4	141	D	0.740916	1.40059	0.131526	0.734061	1.08925	0.919864	0.46514	0.0922679	0.414439	1.79027	1.55866	1.12895	1.28294	1.41023	0.942977	1.01088	2.06544	0.880212	1.2283	1.93694	1.81218	3.39567	1.42091	2.62987	1.13703	1.19085	1.29146	1.41513	1.19778	0.984656	0.900228	1.39261	0.413538	0.820657	0.680685	0.652843	0.904001	2.11776	0.799909	1.21563	0.659614	2.1705	0.677645
46	32	36.934	Methyl 10-trans,12-cis-octadecadienoate	C19H34O2	164	D	0.351919	1.15822	0	0.635997	1.16105	0.299625	0.502438	0	0.309519	1.49459	1.58787	0.76673	1.47693	2.4076	1.13702	1.64723	3.298	1.77373	1.32711	2.39347	1.10522	2.05145	4.19193	7.47156	3.23228	0.624691	1.42746	0.858597	0.744117	0.79853	0.797117	1.64087	0.113773	0.780157	0.81761	0.564624	1.02678	1.50237	0.635997	1.28401	0.525758	1.8663	0.656491
47	33	37.022	Octanoic acid, 2-methoxy-, methyl ester	C10H20O3	129	D	0.582599	1.2403	0.0904676	0.679071	0.951158	0.655418	0.46298	0.116345	0.406314	1.67767	1.51748	0.91788	1.27272	1.56821	1.06608	1.22934	2.63559	1.28172	1.12316	1.86699	1.29245	2.47953	1.9196	3.67495	1.89734	0.897346	1.20808	1.04768	0.867324	0.725999	0.848716	1.19797	0.323429	0.857944	0.767414	0.60732	0.927809	2.06975	0.732619	1.04908	0.632763	2.14869	0.65812
48	34	37.157	Bicyclo[3.1.1]heptan-3-one, 2,6,6-trimethyl-	C10H16O	201	D	0.344337	0.64243	0.105871	0.390792	0.532787	0.582722	0.439826	0.164304	0.431416	1.18295	1.24817	0.854599	1.02599	1.46923	0.907367	1.11059	2.29759	1.20789	1.06856	1.49051	1.31855	2.31615	1.88485	3.33174	1.50485	0.763054	1.03632	0.813207	0.6647	0.804235	1.1402	1.52338	0.650878	0.939569	1.10056	1.05262	1.45033	2.94199	1.0181	1.62109	0.933042	2.98924	1.25955
49	35	37.316	9,12-Octadecadienoic acid (Z,Z)-, methyl ester 2	C19H34O2	294	D	0	1.61297	0	0	1.80126	0	0	0	0	2.59833	0	0	1.11088	0	0.60251	0.495816	0	0.728033	0.960251	1.85774	1.5251	2.19038	4.18619	0	2.12762	0.633891	2.37866	0.320084	0.577406	0	0.665272	3.01255	0	0	0	0	0.721757	4.88912	0	0.671548	0	0	0
50	36	37.879	Methyl cis-11-eicosenoate(C20:1)	C21H40O2	292	A	0	0	0	0	0	0	0	0	0	2.6259	1.54317	0.334532	0.741007	3.69784	0.151079	1.15468	5.08633	2.20504	1.03957	4.08273	2.28058	8.36331	12.9353	23.0755	7.47482	0	1.84173	0.564748	0	0	1.84173	5.55036	0	0.730216	2.78777	1.43165	2.55396	10.0144	1.76978	5.32374	0.161871	10.2122	2.22662
51	37	38.079	Methyl arachidate(C20:0)	C21H42O2	326	A	0.112738	0.290037	0.00360761	0.153173	0.220215	0.272976	0.230286	0.0296125	0.146935	1.00532	1.08138	0.607131	0.804197	1.57247	0.747828	0.870036	2.06641	1.25402	0.77511	1.5276	1.22403	2.34878	3.49608	6.56367	1.98584	0.602471	0.959174	0.687175	0.615323	0.547605	1.51843	2.42619	0.687325	1.34278	1.38096	1.5297	2.22883	4.87749	1.6211	2.54096	1.28401	7.36644	1.41975
52	38	39.271	cis-13-Octadecenoic acid	C18H34O2	125	D	0.150689	0.660322	0.0112569	0.216696	0.390411	0.281423	0.213626	0.456418	0.255584	1.12723	1.13158	0.597129	0.949932	1.01415	0.906951	1.01108	3.23688	1.12109	0.931	1.55423	1.24619	2.91478	1.8927	4.21598	1.53197	0.649321	0.895694	0.856295	0.613503	0.984726	1.38512	2.14496	0.410367	1.08399	1.16791	1.33011	2.56991	7.03175	1.09039	1.69724	1.10702	6.19822	1.76401
53	39	39.373	Oxiraneoctanoic acid, 3-octyl-, methyl ester	C19H36O3	155	D	0.280453	0.634836	0.0815352	0.34449	0.500114	0.466394	0.234926	0.115947	0.388741	1.37067	1.34126	0.771739	1.00996	1.38956	0.966721	1.20665	4.90833	1.32158	1.0156	1.86488	1.41695	4.57873	2.21634	9.20784	1.9227	0.64207	1.03033	0.725945	0.510326	0.753974	1.00411	1.35084	0.319386	0.864549	1.14038	0.890983	1.47582	6.48888	0.929278	1.51891	0.763229	6.01557	1.16899
54	40	40.113	1-Penten-3-ol, 2-methyl-	C6H12O	129	D	0.504013	1.25772	0.0955833	0.682378	1.06816	0.607105	0.39372	0.118048	0.347128	1.79559	1.65077	0.888316	1.37214	1.54921	0.840493	1.31484	3.50027	1.29521	1.12983	1.81885	1.50484	2.89193	2.27554	4.50497	2.0107	1.01966	1.28364	1.17291	0.832923	0.756912	0.884561	1.29114	0.312477	0.847818	0.739925	0.58741	0.939954	2.37598	0.727984	1.06483	0.61129	2.52505	0.625385
55	41	40.211	Ethanedioic acid, bis(3-methybutyl)ester	C12H22O4	255	D	0.562471	1.27124	0.0487646	0.632163	0.868286	0.716958	0.535917	0.0818337	0.378962	1.64901	1.62039	0.928995	1.32513	1.93894	0.946665	1.26946	2.76132	1.12317	1.17104	1.7344	1.35346	2.67919	2.52855	4.47065	1.84723	0.930772	1.25584	1.41723	0.866312	0.702447	0.872926	1.01952	0.423581	0.78586	0.588235	0.586656	0.773324	2.02028	0.679151	0.910931	0.600871	3.40918	0.636506
56	42	40.3	2-Nonen-1-ol, 2-methyl-	C10H20O	201	D	0.69593	1.3224	0.0754899	0.836539	0.889237	0.867893	0.561471	0.110341	0.446548	1.37498	1.83033	0.937112	1.20314	1.33422	0.845945	1.19325	2.25927	0.850769	1.02044	1.64329	1.68538	2.79723	1.89436	3.16973	1.25475	1.17733	1.3259	1.40054	0.798071	0.731625	0.924329	1.33844	0.42448	0.645282	0.539041	0.671932	0.748387	1.97033	0.838227	0.845342	0.655773	2.4855	0.714501
57	43	40.467	2,15-Hexadecanedione	C16H30O2	215	D	0.459979	1.0343	0	0.786123	0.56263	0.788721	0.200104	0	0.0688669	1.56835	1.40073	1.2422	1.41762	1.12916	1.43581	0.602911	1.8854	0.658784	1.00702	0.873181	1.38773	1.79574	1.86071	2.4974	0.838098	0.852391	1.21102	1.53586	1.15904	0.966736	0.534044	1.4657	0.24948	0.595114	0.548337	0.216996	0.597713	2.13098	0.510655	0.908264	0.280665	3.00546	0.378119
58	44	41.287	1,7-Nonadiene, 4,8-dimethyl-	C11H20	201	D	0.0941307	0.530946	0	0.026455	0.23871	0.0596776	0.0621386	0.68537	0.200566	0.913006	0.89578	0.320536	0.932693	0.652147	0.691522	1.11665	3.42623	1.18802	0.878553	1.40458	1.1148	3.13953	1.84139	5.76412	1.7651	0.526024	0.696444	0.866864	0.408515	0.968992	1.43226	1.88077	0.154424	1.18125	1.22185	1.34244	2.41541	8.48037	1.10065	1.71465	1.18125	8.81383	1.74296
59	45	42.413	Methyl behenate (C22:0)	C23H46O2	354	A	0	0.221618	0	0.0898452	0.125783	0.208257	0.0516034	0	0.0350166	1.05096	0.999816	0.505437	0.715536	1.49189	0.506358	0.716458	2.95153	1.06708	0.95282	1.60247	1.10947	2.81238	3.72143	6.70752	1.98443	0.537228	1.02009	0.630759	0.561648	0.488389	1.43061	2.00101	0.483782	1.32556	1.66006	1.54856	2.6373	8.9002	1.56976	2.4871	1.16522	10.7418	1.32787
60	46	48.986	Methyl lignocerate(C24:0)	C25H50O2	382	A	0.179491	0.43085	0	0.193793	0.301416	0.323227	0.270488	0.015911	0.203804	1.36013	1.34994	0.926773	1.10948	1.3081	0.968607	1.11663	3.30825	1.40571	1.30328	2.02589	1.39445	3.9715	4.0448	6.31204	2.07702	0.695795	0.994887	0.809675	0.794658	0.636978	1.16401	1.40661	0.474113	1.20692	1.19959	0.954305	1.67155	5.11263	1.33563	2.03643	0.945545	9.28275	0.990239
[truncated: 7 more columns]
