# Supplementary material for: Integrated metabolomics and lipidomics analyses suggest the temperature-dependent lipid desaturation promotes aflatoxin biosynthesis in Aspergillus flavus
Source: Front Microbiol. 2023 Mar 31;14:1137643. doi: 10.3389/fmicb.2023.1137643 (PMC10102665; doi:10.3389/fmicb.2023.1137643)
Supplement: Supplementary file 6 [file Data_Sheet_1.docx]

***Supplementary Material***

**Integrated metabolomics and lipidomics analyses suggest the temperature-dependent lipid desaturation promotes aflatoxin biosynthesis in *Aspergillus flavus***

**Shaowen Wu1, Wenjie Huang1, Fenghua Wang1, Xinlu Zou1, Xuan Li1, Chun-Ming Liu2, Wenyang Zhang1, Shijuan Yan1***

1Guangdong Key Laboratory for Crop Germplasm Resources Preservation and Utilization, Agro-biological Gene Research Center, Guangdong Academy of Agricultural Sciences, Guangzhou, 510640, China

2Key Laboratory of Plant Molecular Physiology, Institute of Botany, Chinese Academy of Sciences, 20 Nanxincun, Fragrant Hill, Beijing, 100093, China

*** Correspondence:** Shijuan Yan: [shijuan@agrogene.ac.cn](mailto:shijuan@agrogene.ac.cn)

1. **Supplementary Figures and Tables**
2. **Supplementary Figures**


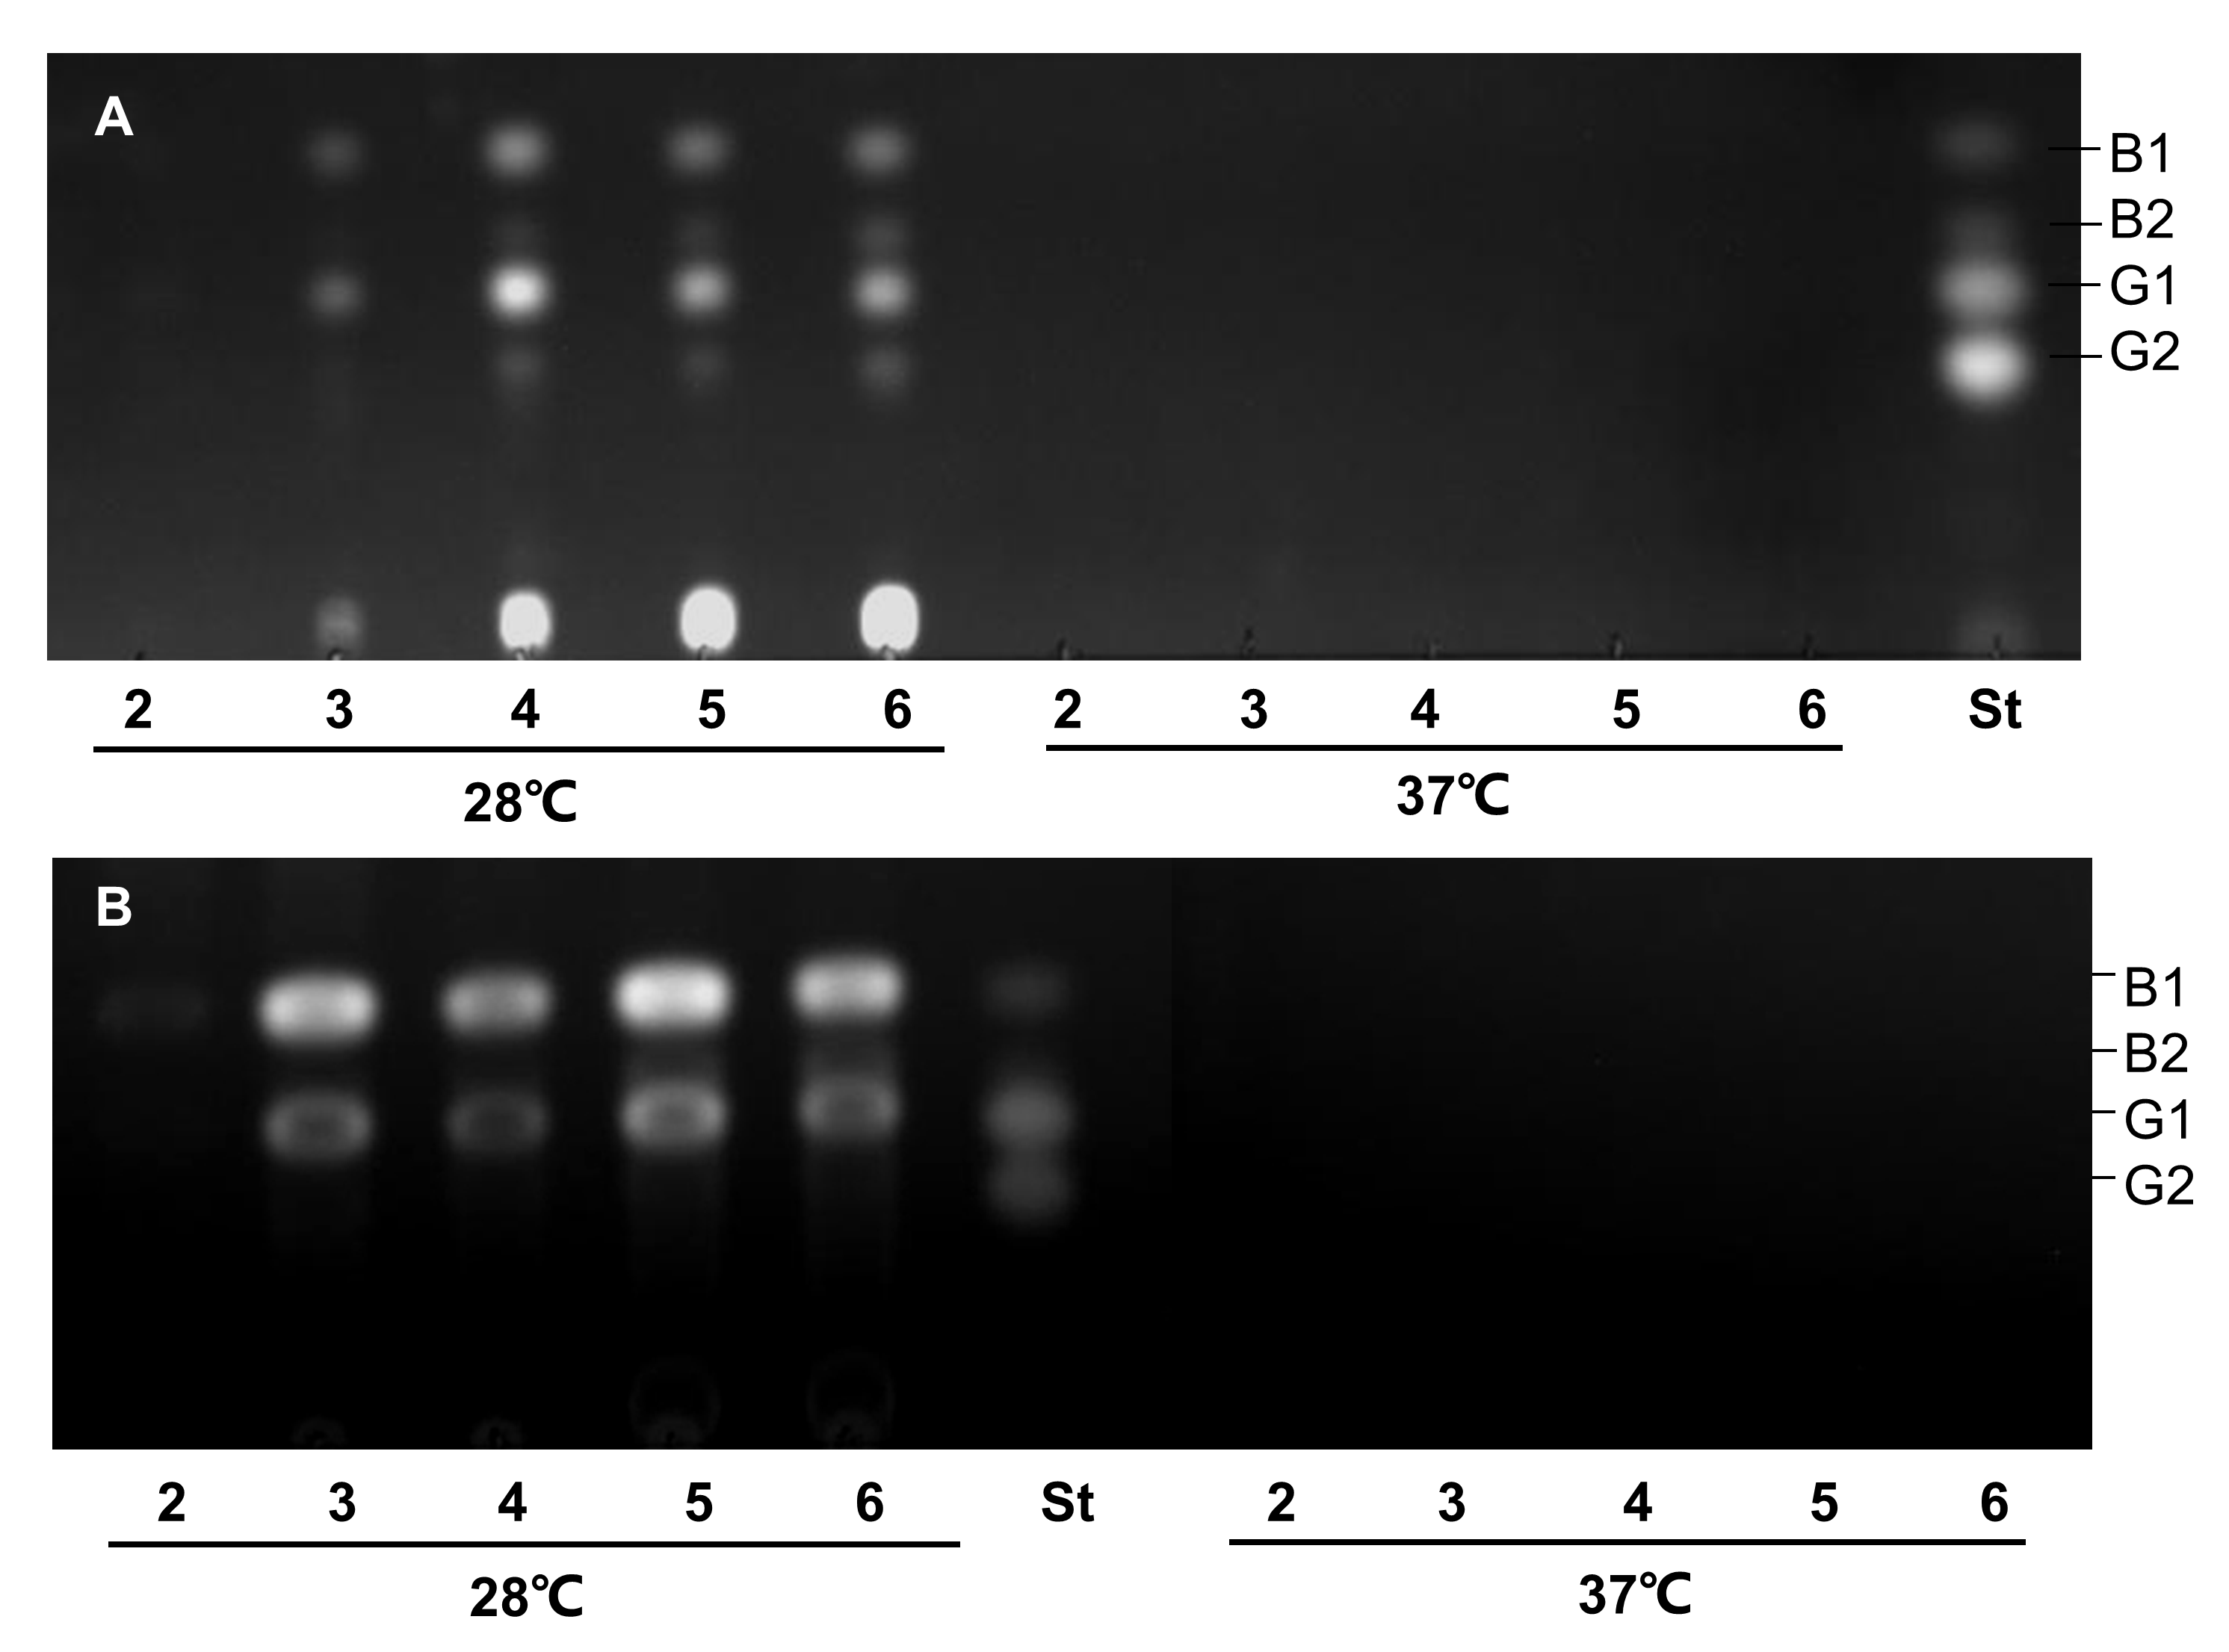


**Supplementary Figure 1. Effects of temperature on AF production in *A. flavus*.** (A) The contents of AFs in mycelia across 6 days. (B) The contents of AFs in GMS media across 6 days.


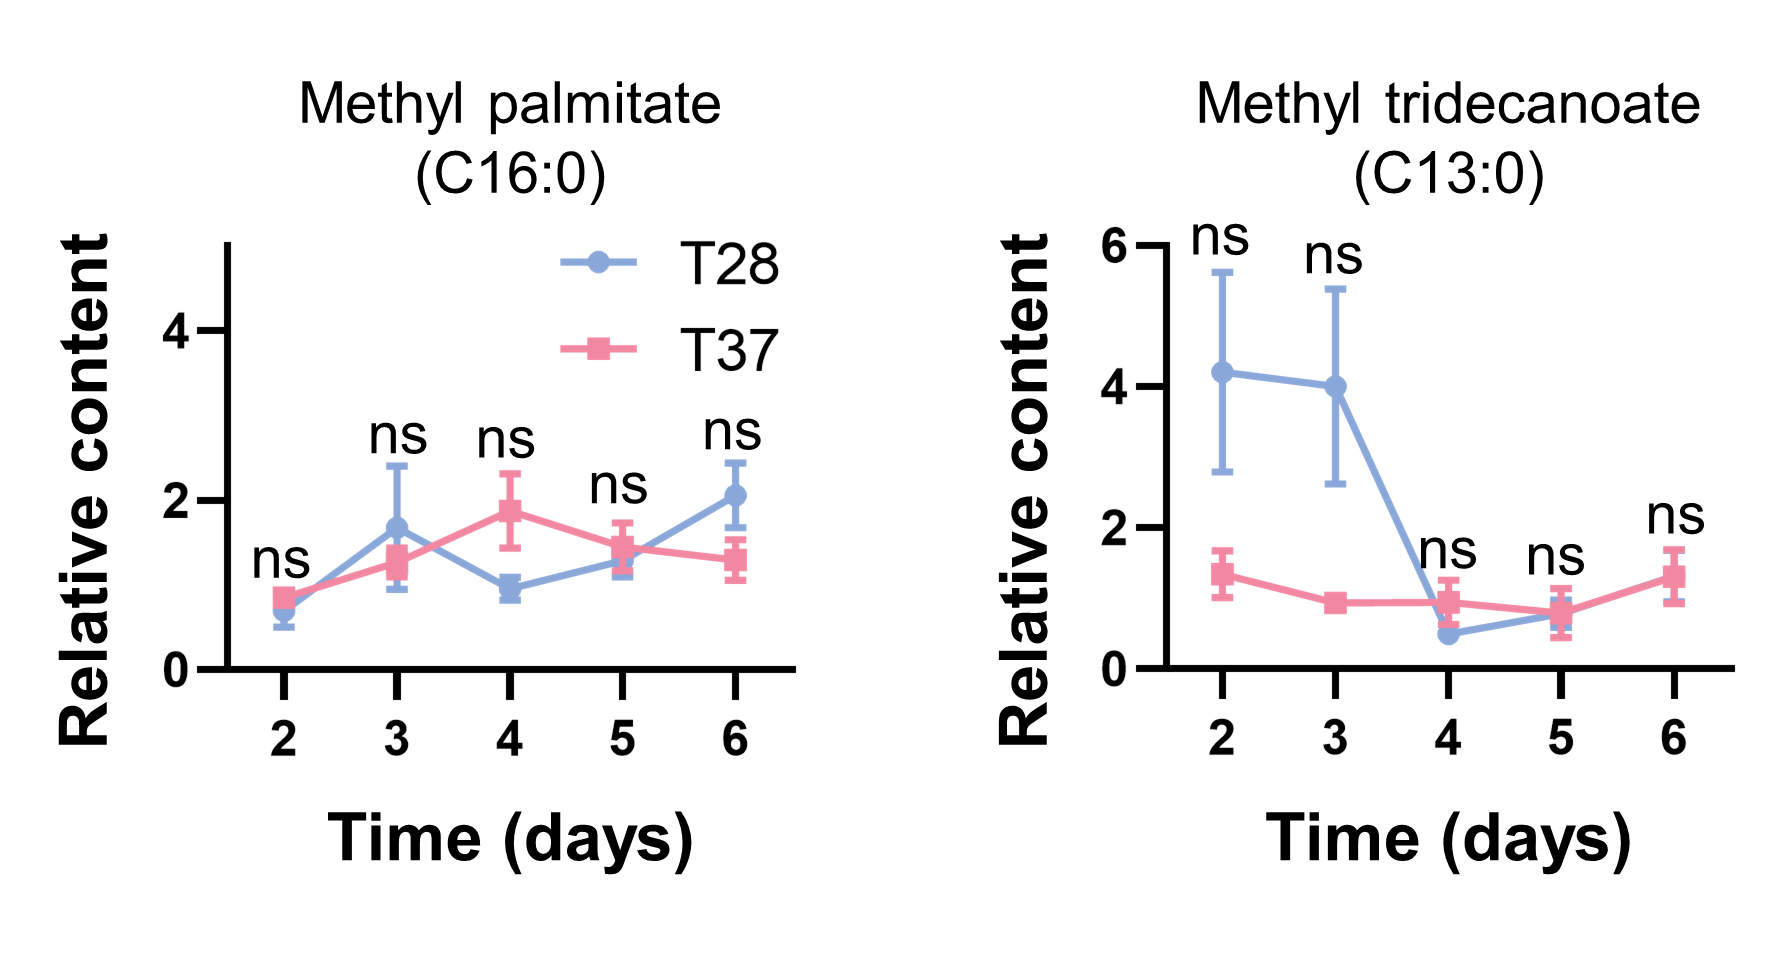


**Supplementary Figure 2.** The relative contents of fatty acids quantified by GC-MS.

1. **List of Supplementary Tables**

**Supplementary Table S1**. List of genes and primers used in this study.

**Supplementary Table S2**. The total peak information for primary metabolome in mycelia samples detected by GC-MS.

**Supplementary Table S3**. The total peak information for lipidome in mycelia samples detected by LC-MS (ESI+).

**Supplementary Table S4**. The total peak information for lipidome in mycelia samples detected by LC-MS (ESI-).

**Supplementary Table S5**. The peak information for fatty acids in mycelia samples detected by GC-MS.
